# Supplementary material for: Activity of Estrogen Receptor β Agonists in Therapy-Resistant Estrogen Receptor-Positive Breast Cancer
Source: PubMed Central journal article supplement (PMC9097292; doi:10.3389/fonc.2022.857590), 2022-04-25
Supplement: DataSheet_1.pdf [file DataSheet_1.pdf]

## Supplemental Data

### Preparation of MCSR-18-006

#### Synthetic Scheme for the Preparation of MCSR-18-006

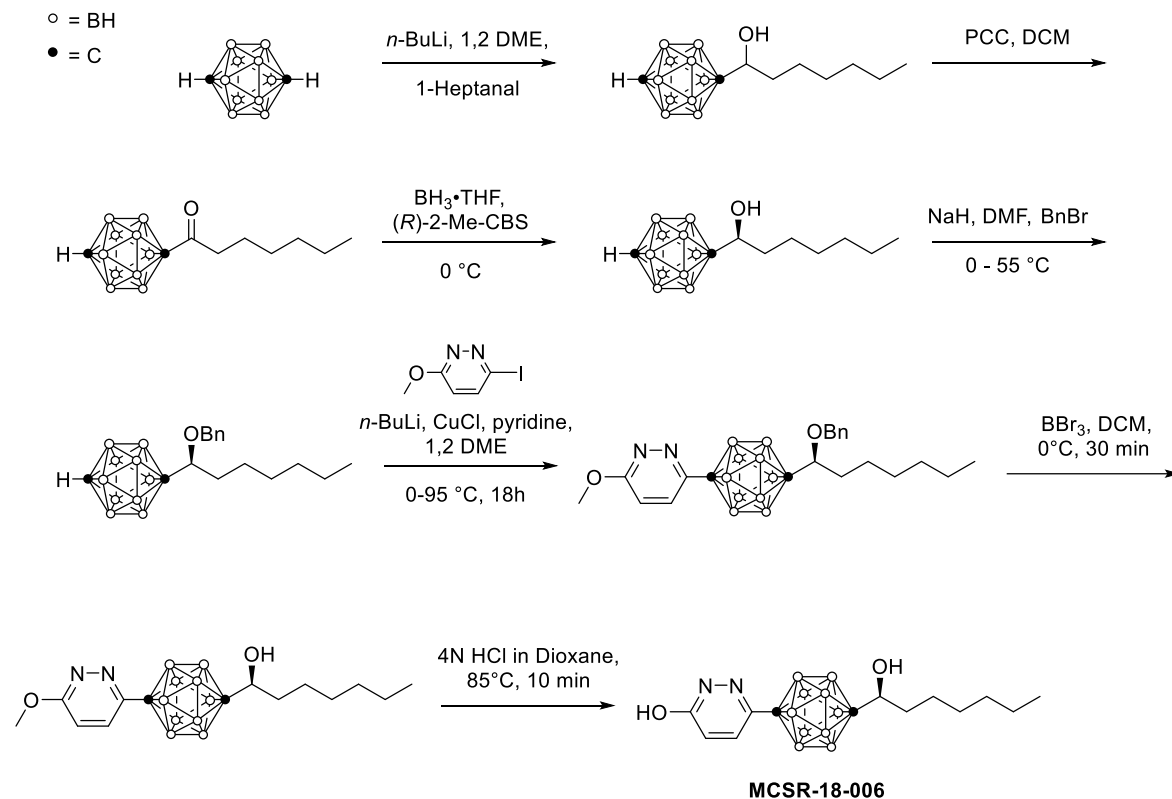

#### Procedure for the synthesis of MCSR-18-006

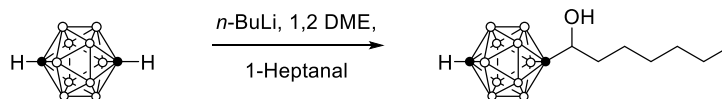

*1-(1-hydroxyheptyl)-1,12-dicarba-closo-dodecaborane*: *n*-BuLi solution (2.5M in hexane, 4.4 ml) was added dropwise at 0 °C under Ar to a solution of 1,12-dicarba-closo-dodecaborane (1.44 g, 10 mmol) in 1,2 dimethoxyethane (50 ml). We stirred the mixture at room temperature for 1 hour and then added 1-heptanal (1.55 ml, 11 mmol) at 0 °C. This mixture was then stirred at room temperature overnight. We then poured the mixture into 1 M HCl aqueous solution (100 ml), and

performed extraction with ethyl acetate (3 X 25 ml). We then washed the combined organic phases with brine and dried them over MgSO<sub>4</sub>. We evaporated the solvents and purified the residue using Teledyne Isco (RediSepRf column) to yield a colorless oil. Yield 1.4g. <sup>1</sup>H NMR (CDCl<sub>3</sub>) δ 3.38-3.45(m, 1 H), 3.35-1.14 (m, 22H), 0.88 (t, 3 H), MS 258.291.

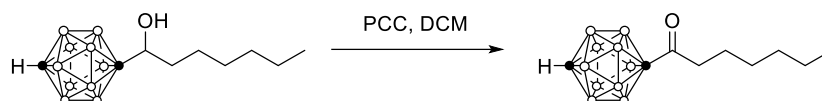

*1-(Heptan-1-one)-1,12-dicarba-closo-dodecaborane*: We suspended pyridinium chlorochromate (PCC, 1.7 g, 7.71 mmol) in anhydrous DCM (50 ml). We then added a solution of 1-(heptan-1-yl)-1,12-dicarba-closo-dodecaborane (1.3 g, 5.04 mmol) in DCM (10 ml), and stirred the reaction mixture at room temperature overnight. Diethyl ether (50 ml) was added to the mixture followed by molecular sieves, and then stirred for 1 h. We decanted the supernatant and washed the insoluble residue with dry ether (3 x 20 ml). We then passed the combined organic phases through a short column of Celite followed by evaporation. We then purified the residue with Teledyne Isco (RediSepRf column) to yield a colorless oil, yield 1.2g. <sup>1</sup>H NMR (CDCl<sub>3</sub>) δ 1.16 (m, 21H), 0.88 (t, 3 H), MS 256.189.

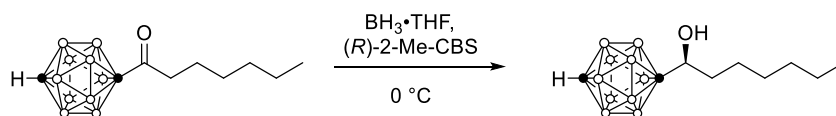

*(R)-1-(1-hydroxyheptyl)-1,12-dicarba-closo-dodecaborane*: We added Borane-tetrahydrofuran complex (51 mL, 51 mmol, 1.0 M solution in THF, stabilized with 0.005 M N-isopropyl-N-methyl-tert-butylamine (NIMBA) followed by (R)-2-methyl-CBS-oxazaborolidine [(2-MeCBS) (5.1 mL, 5.1 mmol, 1.0 M solution in toluene) to 50 mL anhydrous THF. The reaction mixture was stirred at room temperature for 15 minutes. We then added 1-(Heptan-1-one)-1,12-dicarba-

*closo*-dodecaborane (1.3 g, 5.08 mmol) in 25 mL of anhydrous THF slowly over a period of 2 h at 0 °C. The reaction mixture was stirred overnight at room temperature. We then carefully quenched the mixture by the addition of 2.0 M HCl (80 mL) in small portions to control H<sub>2</sub> development. We added diethyl ether (100 mL) and washed the organic phase with brine and saturated NaHCO<sub>3</sub>. We then dried the organic phase over MgSO<sub>4</sub>, filtered, and evaporated. The residue was then purified by Teledyne Isco (RediSepRf column) to yield a colorless oil, yield 1.1g 81%. <sup>1</sup>H NMR (CDCl<sub>3</sub>) δ 3.38-3.45(m, 1 H), 3.35-1.14 (m, 22H), 0.88 (t, 3 H), MS 258.291.

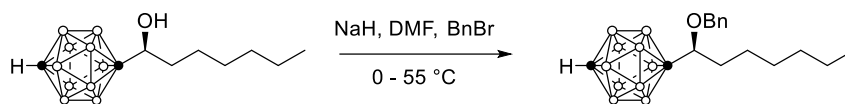

*(R)*-1-(1-benzyloxy)heptyl)- 1,12-dicarba-*closo*-dodecaborane: We added NaH (60% in mineral, 175 mg, 4.36 mmol) in one portion at 0 °C to a solution of *(R)*-1-(1-hydroxyheptyl)- 1,12-dicarba-*closo*-dodecaborane (900 mg, 3.49 mmol) in anhydrous DMF (10 ml), , and then stirred at same temperature for 30 min. We then added BnBr (746 mg, 4.36 mmol) and stirred the reaction mixture at 55°C for 3 h. We then cooled it down to room temperature and added methanol (0.5 ml) slowly, followed by dilution with ethyl acetate (50ml), washing with water and brine and drying with Na<sub>2</sub>SO<sub>4</sub>. The solvents were then evaporated and the residue purified by Teledyne Isco (RediSepRf column) to yield a colorless oil, yield 1.1g 93%. <sup>1</sup>H NMR (300 MHz, CDCl<sub>3</sub>) δ 7.28-7.35 (m, 5H), 4.63 (d, *J* = 11 Hz), 4.30 (d, *J* = 11 Hz), 3.12-3.23 (m, 1H), 2.75 (s, 1H), 0.98-1.40 (m, 10H), 0.96-3.30 (m, 10H), 0.87 (t, *J* = 7 Hz, 3H).

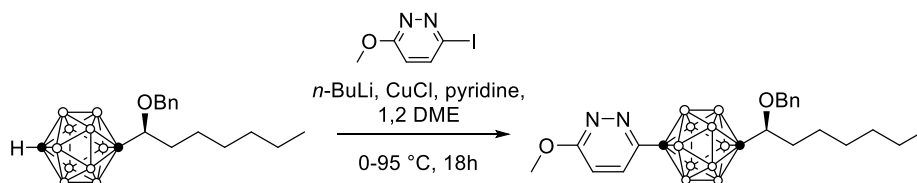

*(R)*-1-(1-(benzyloxy)heptyl)-12-(6-methoxypyridazin-3-yl)-1,12-dicarba-closo-dodecaborane: *n*-BuLi solution (2.5 M in hexanes, 274  $\mu$ l, 0.68 mmol) at 0°C under Ar was added dropwise to a solution of *(R)*-1-(1-(benzyloxy)heptyl)-1,12-dicarba-closo-dodecaborane (197 mg, 0.56 mmol) in 1,2-dimethoxyethane (14.1 ml). We then stirred the mixture at room temperature for 1h, and added CuCl (68 mg, 0.68 mmol) in one portion. Stirring was continued at room temperature for 1 h. We then added pyridine (637  $\mu$ l, 7.91 mmol), and 3-iodo-6-methoxypyridazine (161 mg, 0.68 mmol) sequentially and heated the mixture at 95°C for 18 h. Following cooling, the reaction mixture was diluted with Et<sub>2</sub>O and then stirred at room temperature for 3 h. We then filtered the insoluble materials through a short pad of silica, washed the filtrate with 10% aqueous Na<sub>2</sub>S<sub>2</sub>O<sub>3</sub> and brine, and dried the organic layer over Na<sub>2</sub>SO<sub>4</sub>, followed by filtration and concentration. We then purified the resulting residue using Combiflash (SiO<sub>2</sub>, RediSepRf 12 g gold column, gradient: EtOAc/Hex) to yield 108 mg (42%) of a clear colorless oil. <sup>1</sup>H NMR (300 MHz, CDCl<sub>3</sub>):  $\delta$  7.22-7.38 (m, 6H), 6.80 (d, *J* = 9.2 Hz, 1H), 4.65 (d, *J* = 11.0 Hz, 1H), 4.33 (d, *J* = 11.0 Hz, 1H), 4.09 (s, 3H), 3.23-3.29 (m, 1H), 1.41-3.66 (m, 10H), 1.01-1.44 (m, 10H), 0.85 (t, *J* = 7.0 Hz, 3H).

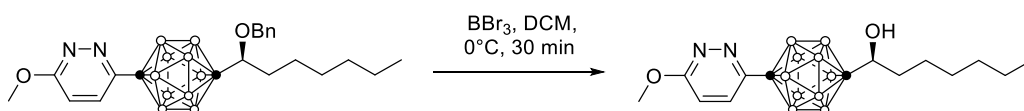

*(R)*-1-(1-hydroxyheptyl)-12-(6-methoxypyridazin-3-yl)-1,12-dicarba-closo-dodecaborane: 1 M solution of BBr<sub>3</sub> in CH<sub>2</sub>Cl<sub>2</sub> (0.70 mL, 0.70 mmol) was added dropwise at 0 °C to a solution of *(R)*-1-(1-(benzyloxy)heptyl)-12-(6-methoxypyridazin-3-yl)-1,12-dicarba-closo-dodecaborane (91 mg, 0.20 mmol) in CH<sub>2</sub>Cl<sub>2</sub> (2 ml). The mixture was stirred at 0 °C for 30 min and then poured into ice water and NaHCO<sub>3</sub>. We then extracted the mixture 3x with CH<sub>2</sub>Cl<sub>2</sub> (*note: 1-2% methanol was added to clarify the emulsion*). We washed the organic layer with brine, dried it over Na<sub>2</sub>SO<sub>4</sub>, and filtered and concentrated it *in vacuo*. We purified the resulting residue using Combiflash (SiO<sub>2</sub>, RediSepRf 4g column, gradient: EtOAc/Hex) to yield 61 mg (83%) of a white powder. <sup>1</sup>H NMR (400 MHz, CDCl<sub>3</sub>):  $\delta$  7.25 (d, *J* = 9.3 Hz, 1H), 6.80 (d, *J* = 9.3 Hz, 1H), 4.09 (s, 3H), 3.44-3.50 (m, 1H), 1.63-3.40 (m, 10H), 1.59 (d, *J* = 6.2 Hz, 1H), 1.11-1.49 (m, 10H), 0.87 (t, *J* = 6.9 Hz, 3H).

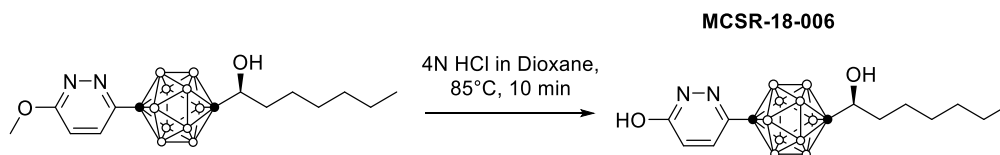

*(R)*-1-(1-hydroxyheptyl)-12-(6-hydroxypyridazin-3-yl)-1,12-dicarba-closo-dodecaborane : We added a solution of 4N HCl in Dioxane (0.5 mL) to *(R)*-1-(1-hydroxyheptyl)-12-(6-methoxypyridazin-3-yl)-1,12-dicarba-closo-dodecaborane (50 mg, 0.14 mmol). We then heated the mixture at 85 °C for 10 min, cooled it to room temperature, evaporated it to dryness with a gentle stream of argon, treated the residue with saturated aq. NaHCO<sub>3</sub> and extracted it 3x with ethyl acetate. We then washed the organic layer with brine, dried it over Na<sub>2</sub>SO<sub>4</sub>, filtered and concentrated it *in vacuo*. We purified the resulting residue using Combiflash (SiO<sub>2</sub>, RediSepRf 4g gold column, gradient: MeOH/DCM) to yield 38 mg (79%) of a white powder. <sup>1</sup>H NMR (400 MHz, CDCl<sub>3</sub>): δ 10.79 (br s, 1H), 7.14 (d, *J* = 10.0 Hz, 1H), 6.79 (d, *J* = 10.0 Hz, 1H), 3.40-3.50 (m, 1H), 1.66-3.30 (m, 10H), 1.62 (d, *J* = 6.3 Hz, 1H), 1.11-1.50 (m, 10H), 0.87 (t, *J* = 6.9 Hz, 3H). MS (APCI-): *m/z* calcd. for C<sub>13</sub>H<sub>27</sub>B<sub>10</sub>N<sub>2</sub>O<sub>2</sub> (M-H)<sup>-</sup> 351.3, found 351.1.

### NMR Spectra for carborane compounds

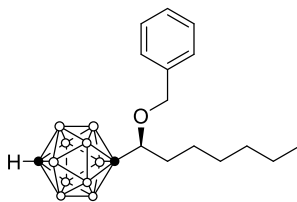

Molecular Weight: 348.53  
Chemical Formula: C<sub>16</sub>H<sub>32</sub>B<sub>10</sub>O

(R)-1-(1-Benzyloxy)heptyl)- 1,12-dicarba-closo-dodecaborane

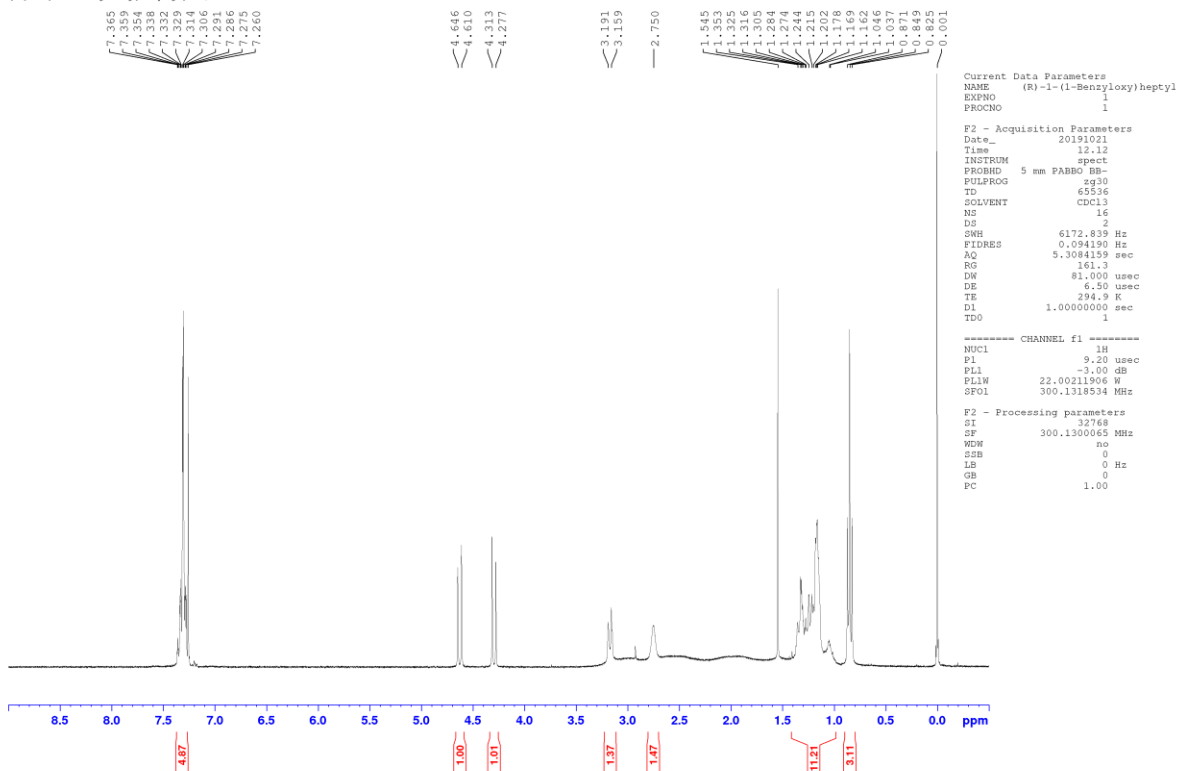

$^1\text{H}$  NMR ( $\text{CDCl}_3$ , 300MHz) of Compound (R)-1-(1-benzyloxy)heptyl)- 1,12-dicarba-closo-dodecaborane.

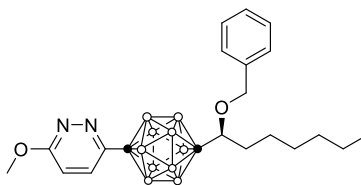

Molecular Weight: 456.63  
Chemical Formula:  $\text{C}_{21}\text{H}_{36}\text{B}_{10}\text{N}_2\text{O}_2$

(R)-1-(1-(benzyloxy)heptyl)-12-(6-methoxypyridazin-3-yl)-1,12-dicarba-closo-dodecaborane

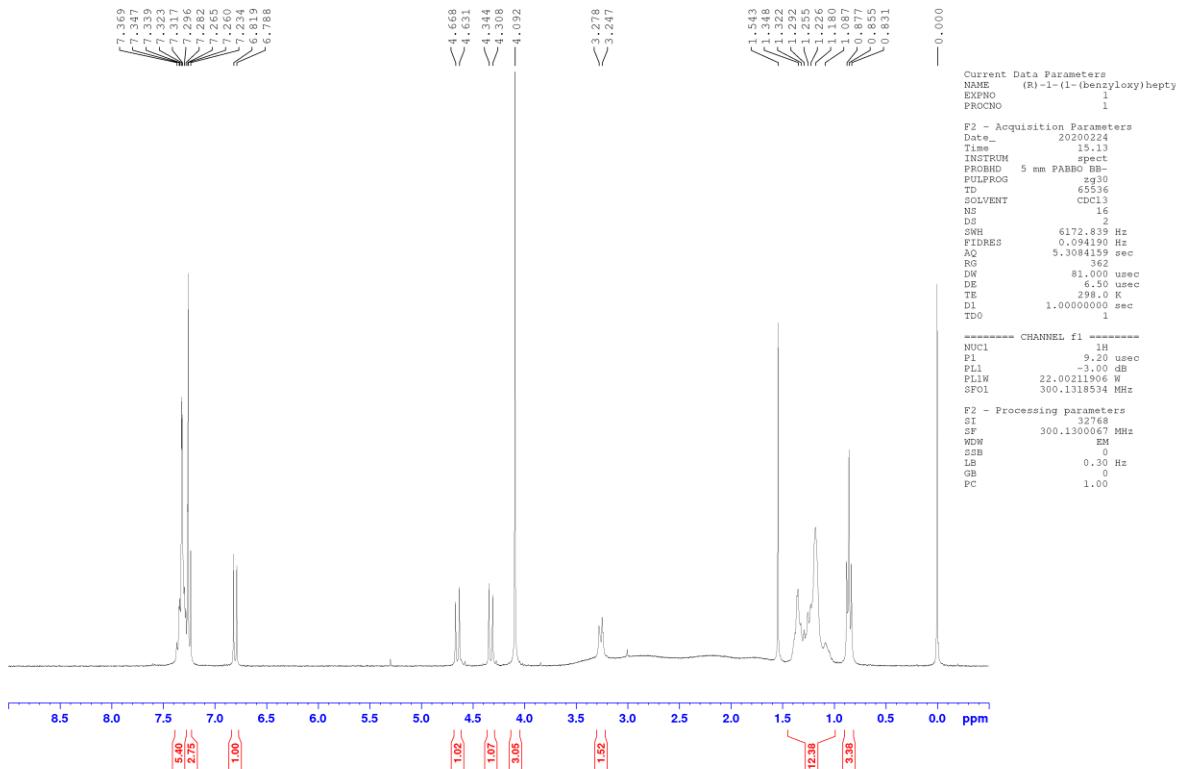

$^1\text{H}$  NMR ( $\text{CDCl}_3$ , 300MHz) of Compound (R)-1-(1-(benzyloxy)heptyl)-12-(6-methoxypyridazin-3-yl)-1,12-dicarba-closo-dodecaborane.

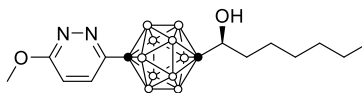

Molecular Weight: 366.51  
Chemical Formula:  $\text{C}_{14}\text{H}_{30}\text{B}_{10}\text{N}_2\text{O}_2$

(R)-1-(1-hydroxyheptyl)-12-(6-methoxypyridazin-3-yl)-1,12-dicarba-closo-dodecaborane

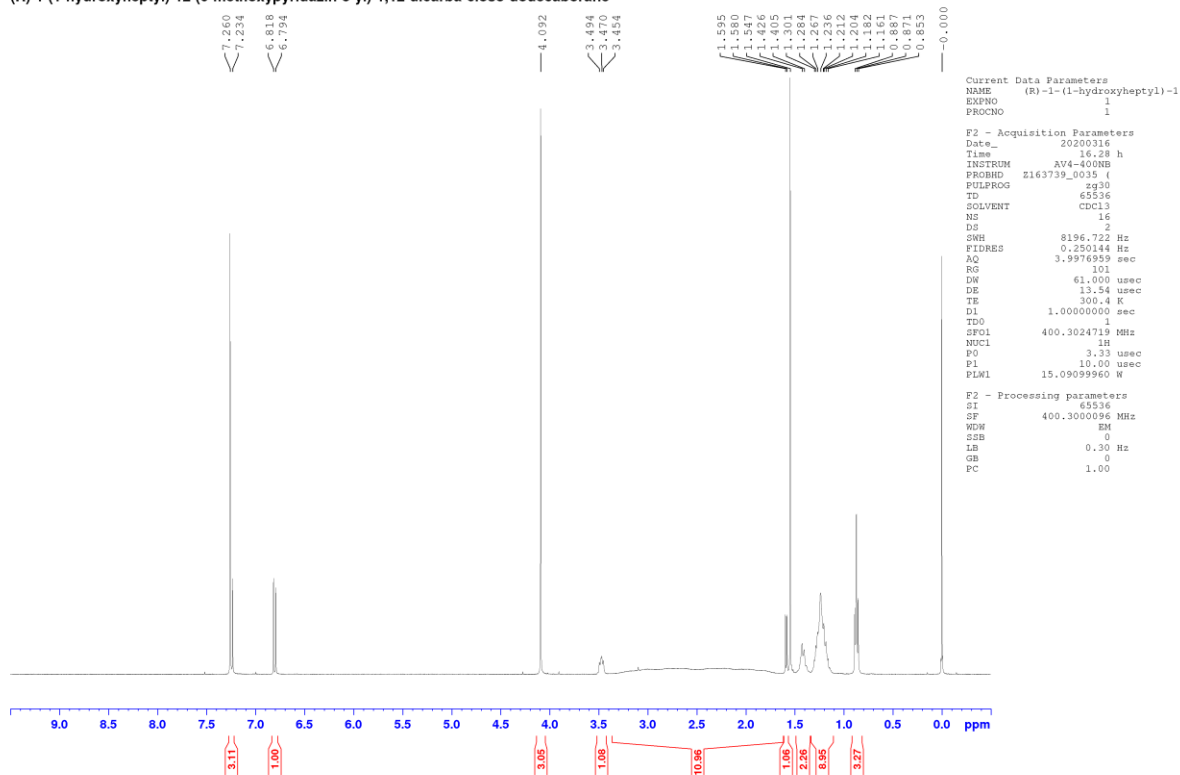

$^1\text{H}$  NMR ( $\text{CDCl}_3$ , 400MHz) of Compound (R)-1-(1-hydroxyheptyl)-12-(6-methoxypyridazin-3-yl)-1,12-dicarba-closo-dodecaborane.



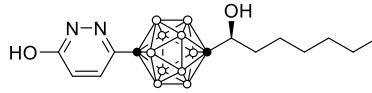

Molecular Weight: 352.48  
 Chemical Formula: C<sub>13</sub>H<sub>28</sub>B<sub>10</sub>N<sub>2</sub>O<sub>2</sub>

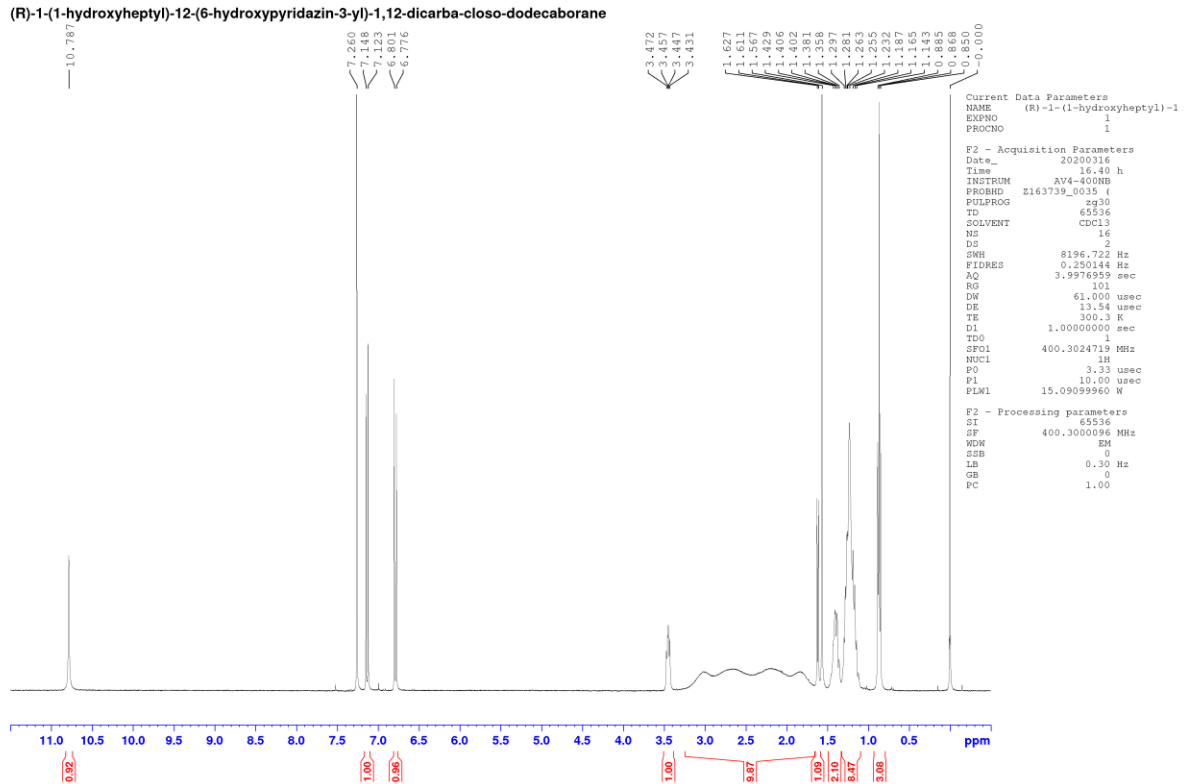

<sup>1</sup>H NMR (CDCl<sub>3</sub>, 400MHz) of Compound (R)-1-(1-hydroxyheptyl)-12-(6-hydroxypyridazin-3-yl)-1,12-dicarba-*closo*-dodecaborane (**MCSR-18-006**).

**Supplemental Table 1.** P-values and 95% confidence intervals (CIs) were determined for expression of the indicated genes in each cell line compared with that in the normal mammary epithelial line MCF10A.

| <b>qRT-PCR</b>   |                         |               |                          |                 |                |                     |
|------------------|-------------------------|---------------|--------------------------|-----------------|----------------|---------------------|
| <b>Cell Line</b> | <b>ESR2 Full Length</b> |               | <b>ESR2 All Isoforms</b> |                 | <b>ESR1</b>    |                     |
|                  | <b>p-value</b>          | <b>95% CI</b> | <b>p-value</b>           | <b>95% CI</b>   | <b>p-value</b> | <b>95% CI</b>       |
| MCF10A           |                         | 0.862-1.420   |                          | 0.994-1.131     |                | 0.664-1.408         |
| MCF7             | 0.7665                  | 0.962-1.440   | 0.0524                   | 2.999-3.998     | 0.0311         | 49770798-6034.474   |
| MCF7-TamR        | 0.0035                  | 3.240-4.291   | 0.0106                   | 24.990-37.228   | 0.0179         | 9606.865-10728.515  |
| MCF7-FasR        | 0.1196                  | 1.502-1.526   | 0.0369                   | 1.533-2.193     | 0.0227         | 429.422-493.742     |
| MCF7-CDK6 O/E    | 0.1411                  | 1.797-3.375   | 0.001                    | 17.438-23.868   | 0.0147         | 2616.120-2864.450   |
| MCF7-CDK4/6iR    | 0.0001                  | 5.051-7.505   | 0.0018                   | 31.568-54.566   | 0.0041         | 286.422-294.303     |
| T47D             | 0.0265                  | 6.536-8.202   | 0.001                    | 72.211-81.421   | 0.0425         | 11597.865-15091.175 |
| T47D-TamR        | 0.0009                  | 4.698-5.294   | 0.0197                   | 10.835-19.461   | 0.0203         | 3880.165-4398.077   |
| T47D-FasR        | 0.0617                  | 3.377-5.023   | 0.0194                   | 26.819-46.711   | 0.0072         | 3071.065-3209.830   |
| T47D-CDK4/6iR    | 0.0075                  | 4.531-5.427   | 0.002                    | 25.766-30.575   | 0.0331         | 7660.326-9398.086   |
| ZR-75-1          | 0.0001                  | 19.319-20.873 | 0.0145                   | 201.031-219.808 | 0.052          | 230.515-318.321     |
| MDA-MB-231       | 0.0404                  | 3.616-4.985   | 0.0075                   | 10.580-14.571   | 0.0496         | 1.577-1.896         |
| MDA-MB-468       | 0.0003                  | 5.041-5.283   | 0.0761                   | 3.191-4.695     | 0.0158         | 76.036-84.139       |

**Supplemental Table 2.** 95% confidence intervals (CIs) and p-values were determined for ERE-Luciferase activity in ER $\alpha$  and ER $\beta$  overexpressing cells treated with the ER $\beta$  agonists OSU-ERb-12 and LY500307. Left & middle columns: p-values were determined for each protein compared with corresponding untreated control. Right column: p-values were determined for each concentration of agonist treated ER $\beta$  overexpressing cells compared with that of ER $\alpha$  overexpressing cells.

| <b>ERE-Luciferase Activity</b>                   |                              |               |                             |                   |                                                      |
|--------------------------------------------------|------------------------------|---------------|-----------------------------|-------------------|------------------------------------------------------|
| <b>OSU-ERb-12</b>                                |                              |               |                             |                   |                                                      |
|                                                  | <b>ER<math>\alpha</math></b> |               | <b>ER<math>\beta</math></b> |                   | <b>ER<math>\alpha</math> vs ER<math>\beta</math></b> |
| <b>Concentration<br/>(<math>\mu</math>mol/L)</b> | <b>p-value</b>               | <b>95% CI</b> | <b>p-value</b>              | <b>95% CI</b>     | <b>p-value</b>                                       |
| 0                                                |                              | 0.92-1.08     |                             | 0.83-1.17         | 1                                                    |
| 0.01                                             | 0.1435                       | 0.8296-0.9896 | 0.034                       | 2.6241-4.2436     | 0.0232                                               |
| 0.03                                             | 0.0002                       | 3.4941-3.7271 | 0.0053                      | 35.7287-47.0914   | 0.0059                                               |
| 0.1                                              | 0.013                        | 1.6786-1.9486 | 0.0012                      | 37.5178-42.9054   | 0.0012                                               |
| 0.3                                              | 0.0215                       | 1.1673-1.2809 | 0.009                       | 34.5350-49.9702   | 0.0092                                               |
| 1                                                | 0.4306                       | 0.9962-1.1483 | 0.0051                      | 25.8500-33.8219   | 0.0048                                               |
| 5                                                | 0.0003                       | 0.4797-0.6667 | 0.0014                      | 18.9422-21.4334   | 0.0012                                               |
| 10                                               | 0.0263                       | 0.3552-0.5607 | 0.0154                      | 14.2808-22.4943   | 0.0129                                               |
| <b>LY500307</b>                                  |                              |               |                             |                   |                                                      |
|                                                  | <b>ER<math>\alpha</math></b> |               | <b>ER<math>\beta</math></b> |                   | <b>ER<math>\alpha</math> vs ER<math>\beta</math></b> |
| <b>Concentration<br/>(<math>\mu</math>mol/L)</b> | <b>p-value</b>               | <b>95% CI</b> | <b>p-value</b>              | <b>95% CI</b>     | <b>p-value</b>                                       |
| 0                                                |                              | 0.92-1.08     |                             | 0.83-1.17         | 1                                                    |
| 0.01                                             | 0.0009                       | 2.0095-2.2620 | 0.0037                      | 73.7896-93.6231   | 0.0038                                               |
| 0.03                                             | 0.002                        | 1.5881-1.7544 | 0.005                       | 105.2260-107.7026 | 0.0051                                               |
| 0.1                                              | 0.0096                       | 1.6203-1.9066 | 0.0102                      | 63.9673-95.3686   | 0.0102                                               |
| 0.3                                              | 0.0029                       | 1.8031-2.1447 | 0.0373                      | 66.8043-80.2037   | 0.0372                                               |
| 1                                                | 0.0441                       | 1.4546-2.0269 | 0.0019                      | 67.8878-80.1651   | 0.0017                                               |
| 5                                                | 0.0221                       | 1.4274-1.6103 | 0.0003                      | 79.5217-79.9028   | 0.0014                                               |
| 10                                               | 0.046                        | 1.1926-1.3828 | 0.0011                      | 66.5517-77.7049   | 0.0011                                               |

**Supplemental Table 3A.** IC50 values, p-values , and 95% confidence intervals (CIs) were determined for cell viability in cytotoxicity assay with OSU-ERb-12 and LY500307. P-value (for IC50) for each cell line was determined by comparing with MCF10A.

| <b>Cytotoxicity</b> |                      |                |               |                      |                |               |
|---------------------|----------------------|----------------|---------------|----------------------|----------------|---------------|
|                     | <b>OSU-ERb-12</b>    |                |               | <b>LY500307</b>      |                |               |
| <b>Cell Line</b>    | <b>IC50 (μmol/L)</b> | <b>p-value</b> | <b>95% CI</b> | <b>IC50 (μmol/L)</b> | <b>p-value</b> | <b>95% CI</b> |
| MCF10A              | 13.96                |                | 7.186-19.64   | 30.53                |                | 23.983-41.510 |
| MCF7                | 11.22                | 0.0750         | 9.578-13.10   | 3.48                 | 0.0225         | 3.396-3.444   |
| MCF7-TamR           | 9.27                 | 0.0249         | 4.563-14.68   | 7.01                 | 0.0286         | 6.678-7.215   |
| MCF7-FasR           | 4.86                 | 0.0087         | 2.643-8.555   | 1.67                 | 0.0200         | 1.449-1.917   |
| MCF7-CDK6 OE        | 10.75                | 0.0538         | 9.313-12.31   | 7.66                 | 0.0288         | 6.766-8.409   |
| MCF7-CDK4/6iR       | 7.18                 | 0.0089         | 5.391-9.214   | 6.89                 | 0.0337         | 6.714-7.066   |
| T47D                | 10.43                | 0.0403         | 9.715-11.29   | 7.29                 | 0.0297         | 7.260-7.560   |
| T47D-TamR           | 9.40                 | 0.0301         | 9.439-9.461   | 6.66                 | 0.0258         | 5.281-7.925   |
| T47D-FasR           | 9.48                 | 0.0304         | 9.457-9.483   | 7.75                 | 0.0307         | 7.693-7.973   |
| T47D-CDK4/6iR       | 9.08                 | 0.0245         | 8.878-9.042   | 7.47                 | 0.0281         | 6.230-7.838   |

**Supplemental Table 3B.** P-values were determined for cell viability in cytotoxicity assay with OSU-ERb-12 and LY500307. P-value (for IC50) for each cell resistant cell line was determined by comparing with corresponding parental cell line (MCF7 or T47D).

| <b>Cytotoxicity (parental vs drug resistant)</b> |                   |                 |
|--------------------------------------------------|-------------------|-----------------|
|                                                  | <b>OSU-ERb-12</b> | <b>LY500307</b> |
| <b>Cell Line</b>                                 | <b>p-value</b>    | <b>p-value</b>  |
| MCF7                                             |                   |                 |
| MCF7-TamR                                        | 0.0118            | 0.0014          |
| MCF7-FasR                                        | 0.0483            | 0.0043          |
| MCF7-CDK6 OE                                     | 0.1302            | 0.0106          |
| MCF7-CDK4/6iR                                    | 0.0031            | 0.0421          |
| T47D                                             |                   |                 |
| T47D-TamR                                        | 0.0415            | 0.3096          |
| T47D-FasR                                        | 0.0478            | 0.0915          |
| T47D-CDK4/6iR                                    | 0.0271            | 0.4181          |

**Supplemental Table 4.** IC50 values, p-values , and 95% confidence intervals (CIs) were determined for viability of T47D cells in cytotoxicity assay with OSU-ERb-12, LY500307 and combination of drugs as indicated. P-value (for IC50) for each combination was determined by comparing with OSU-ERb-12 or LY500307 alone (as indicated).

| <b>T47D Cytotoxicity</b>        |                      |                |               |
|---------------------------------|----------------------|----------------|---------------|
| <b>Drug</b>                     | <b>IC50 (µmol/L)</b> | <b>p-value</b> | <b>95% CI</b> |
| OSU-ERb-12                      | 14.10                |                | 14.035-14.271 |
| OSU-ERb-12+ 0.5µmol/L 4OH-Tam   | 1.00                 | <0.0001        | 0.6828-1.53   |
| OSU-ERb-12+ 0.25µmol/L Fas      | 4.47                 | 0.0179         | 2.789-8.391   |
| OSU-ERb-12+ 1µmol/L Elacestrant | 6.18                 | <0.0001        | 5.450-7.024   |
| OSU-ERb-12+ 0.75µmol/L MPP      | 3.29                 | 0.0038         | 2.646-4.170   |
| <b>T47D Cytotoxicity</b>        |                      |                |               |
| <b>Drug</b>                     | <b>IC50 (µmol/L)</b> | <b>p-value</b> | <b>95% CI</b> |
| OSU-ERb-12                      | 10.41                |                | 9.715-11.29   |
| OSU-ERb-12+0.75µmol/L MPP       | 1.22                 | 0.0005         | 0.8112-1.823  |
| LY500307                        | 7.29                 |                | 7.131-7.708   |
| LY500307+0.75µmol/L MPP         | 4.48                 | 0.001          | 4.346-4.598   |

**Supplemental Table 5.** Cell viability, Bliss prediction, synergy ratio, synergy 95% CI, and p-values were determined at each drug combination (in T47D cells) as indicated.

| <b>Bliss Independence Model</b>            |                              |                         |                      |                       |                |
|--------------------------------------------|------------------------------|-------------------------|----------------------|-----------------------|----------------|
| <b>Combination</b>                         | <b>Combination Viability</b> | <b>Bliss prediction</b> | <b>Synergy Ratio</b> | <b>Synergy 95% CI</b> | <b>p-value</b> |
| 0.125 µmol/L OSU-ERb-12 + 0.025 µmol/L Tam | 0.83                         | 1.59                    | 1.9                  | 1.44-2.51             | 0.001          |
| 0.250 µmol/L OSU-ERb-12 +0.0 50 µmol/L Tam | 0.83                         | 1.54                    | 1.84                 | 1.42-2.39             | 0.001          |
| 0.500 µmol/L OSU-ERb-12 + 0.100 µmol/L Tam | 0.86                         | 1.8                     | 2.1                  | 1.66-2.65             | <0.001         |
| 1.25 µmol/L OSU-ERb-12 + 0.250 µmol/L Tam  | 0.81                         | 1.75                    | 2.16                 | 1.52-3.05             | 0.002          |
| 2.5 µmol/L OSU-ERb-12 + 0.500 µmol/L Tam   | 0.82                         | 1.97                    | 2.41                 | 1.85-3.13             | <0.001         |
| 5 µmol/L OSU-ERb-12 + 1 µmol/L Tam         | 0.54                         | 1.27                    | 2.35                 | 1.83-3.02             | <0.001         |

**Supplemental Table 6.** IC50 values, p-values, and 95% confidence intervals (CIs) were determined for cell viability in cytotoxicity assay (in T47D cells) with OSU-ERb-12 alone, MCSR-18-006 alone and combination as indicated. P-value (for IC50) for OSU-ERb-12 alone/combination were determined by comparing with MCSR-18-006 alone or respective combination treatment.

| <b>T47D Cytotoxicity</b>       |                      |                |               |
|--------------------------------|----------------------|----------------|---------------|
| <b>Drug</b>                    | <b>IC50 (μmol/L)</b> | <b>p-value</b> | <b>95% CI</b> |
| MCSR-18-006                    | 33.68                |                | 30.82-36.64   |
| OSU-ERb-12                     | 10.41                | 0.0026         | 9.715-11.29   |
| <b>T47D Cytotoxicity</b>       |                      |                |               |
| <b>Drug</b>                    | <b>IC50 (μmol/L)</b> | <b>p-value</b> | <b>95% CI</b> |
| MCSR-18-006+0.5μmol/L 4-OH-Tam | 39.23                |                | 36.56-41.01   |
| OSU-ERb-12+0.5μmol/L 4-OH-Tam  | 1.02                 | <0.0001        | 0.6044-1.552  |

**Supplemental Table 7.** p-values and 95% confidence intervals (CIs) were determined for proliferation of MCF7 and T47D cells. P-value was determined by comparing with the percentage of cell proliferation in each drug treatment with that of the corresponding control (in each cell line).

| <b>Proliferation</b> |                |               |                       |                |               |
|----------------------|----------------|---------------|-----------------------|----------------|---------------|
| <b>MCF7</b>          |                |               | <b>T47D</b>           |                |               |
| <b>Treatment</b>     | <b>p-value</b> | <b>95% CI</b> | <b>Treatment</b>      | <b>p-value</b> | <b>95% CI</b> |
| Control              |                | 50.125-53.475 | Control               |                | 46.355-48.978 |
| Fas 0.5μmol/L        | 0.002          | 18.996-23.504 | Fas 0.5μmol/L         | 0.0033         | 26.163-28.237 |
| OSU-ERb-12 0.5μmol/L | 0.0096         | 36.073-51.861 | OSU-ERb-12 0.5 μmol/L | 0.0087         | 54.730-61.137 |
| OSU-ERb-12 10μmol/L  | 0.0163         | 23.900-26.167 | OSU-ERb-12 10 μmol/L  | 0.0074         | 12.722-20.678 |
| Control              |                | 24.232-28.035 | Control               |                | 46.355-48.978 |
| Fas 0.5 μmol/L       | 0.001          | 12.180-13.687 | Fas 0.5μmol/L         | 0.0189         | 26.796-33.871 |
| LY500307 0.5 μmol/L  | 0.2491         | 39.082-41.918 | LY500307 0.5μmol/L    | 0.02           | 57.681-62.986 |
| LY500307- 3 μmol/L   | 0.0028         | 4.483-10.250  | LY500307- 7μmol/L     | 0.0154         | 30.541-35.192 |

**Supplemental Table 8.** p-values and 95% confidence intervals (CIs) were determined for each phase of cell cycle in OSU-ERb-12- and LY500307-treated MCF7 and T47D cells. P-value for each phase for each treatment was determined by comparing with the percentage of cells present in the corresponding control (DMSO treated) cells.

| Cell Cycle           |         |             |         |               |         |               |         |               |
|----------------------|---------|-------------|---------|---------------|---------|---------------|---------|---------------|
| MCF7                 |         |             |         |               |         |               |         |               |
|                      | Sub G0  |             | G0/G1   |               | S       |               | G2/M    |               |
| Treatment            | p-value | 95% CI      | p-value | 95% CI        | p-value | 95% CI        | p-value | 95% CI        |
| Control              |         | -           |         | 66.396-67.338 |         | 13.971-15.896 |         | 15.313-17.354 |
| OSU-ERb-12 0.5µmol/L | -       | -           | 0.0200  | 55.239-61.028 | 0.0059  | 21.098-21.569 | 0.0890  | 16.706-21.561 |
| OSU-ERb-12 11µmol/L  | 1.0000  | 0.087-0.313 | 0.0038  | 75.655-78.145 | 0.0347  | 9.219-11.581  | 0.0020  | 10.239-11.694 |
| LY500307 0.5µmol/L   | 0.2254  | 0.187-0.413 | 0.0191  | 49.863-57.937 | 0.0493  | 19.719-24.414 | 0.0097  | 20.821-21.512 |
| LY500307 3µmol/L     | 0.1221  | 0.338-1.195 | 0.4598  | 66.517-68.216 | 0.2556  | 14.843-16.090 | 0.2965  | 15.172-15.695 |
| T47D                 |         |             |         |               |         |               |         |               |
|                      | Sub G0  |             | G0/G1   |               | S       |               | G2/M    |               |
| Treatment            | p-value | 95% CI      | p-value | 95% CI        | p-value | 95% CI        | p-value | 95% CI        |
| Control              |         | 0.305-1.162 |         | 81.475-82.858 |         | 6.794-7.139   |         | 7.7664-9.803  |
| OSU-ERb-12 0.5µmol/L | 0.1942  | 1.084-4.382 | 0.0036  | 74.582-76.685 | 0.0015  | 11.931-12.402 | 1.0000  | 7.719-9.748   |
| OSU-ERb-12 10µmol/L  | 0.2799  | 0.317-3.017 | 0.6010  | 84.704-82.096 | 0.0130  | 8.903-9.630   | 0.0749  | 6.199-7.867   |
| LY500307 0.5µmol/L   | 0.2107  | 0.956-4.244 | 0.0018  | 73.166-75.834 | 0.0004  | 13.168-13.299 | 0.8758  | 7.779-9.954   |
| LY500307 7µmol/L     | 0.0068  | 5.781-6.819 | 0.0079  | 42.248-53.019 | 0.0060  | 17.673-21.860 | 0.0135  | 15.508-17.092 |

**Supplemental Table 9.** p-values and 95% confidence intervals (CIs) were determined for induction of apoptosis in OSU-ERb-12- and LY500307-treated MCF7 and T47D cells. P-value (for apoptosis induction) for each treatment was determined by comparing with the percentage of apoptotic cells present in the corresponding control (DMSO treated) cells.

| Apoptosis              |         |           |                        |         |           |
|------------------------|---------|-----------|------------------------|---------|-----------|
| MCF7                   |         |           | T47D                   |         |           |
| Treatment              | p-value | 95% CI    | Treatment              | p-value | 95% CI    |
| Control                |         | 4.56-6.64 | Control                |         | 5.16-7.84 |
| OSU-ERb-12 (0.5µmol/L) | 0.4     | 6.03-7.97 | OSU-ERb-12 (0.5µmol/L) | 0.3     | 4.77-7.29 |
| OSU-ERb-12 (10µmol/L)  | 0.04    | 7.45-9.95 | OSU-ERb-12 (10µmol/L)  | 0.0226  | 12-13.9   |
| Control                |         | 4.56-6.64 | Control                |         | 2.23-4.17 |
| LY500307 (0.5µmol/L)   | 0.03    | 6.03-7.97 | LY500307 (0.5µmol/L)   | 0.003   | 8.88-11.4 |
| LY500307 (3µmol/L)     | 0.015   | 7.45-9.95 | LY500307 (7µmol/L)     | 0.0005  | 9.26-13   |

**Supplemental Table 10.** p-values and 95% confidence intervals (CIs) were determined for assessing the colony forming ability in OSU-ERb-12- and LY500307-treated MCF7 and T47D cells. P-value (for percentage of colony formation) for each treatment was determined by comparing with the percentage of that in the corresponding control (DMSO treated) cells.

| <b>Colony Formation Assay</b> |                |                   |                |                   |
|-------------------------------|----------------|-------------------|----------------|-------------------|
|                               | <b>MCF7</b>    |                   | <b>T47D</b>    |                   |
| <b>Treatment</b>              | <b>p-value</b> | <b>95% CI</b>     | <b>p-value</b> | <b>95% CI</b>     |
| Control                       |                | 560.6272-622.0394 |                | 409.86-532.14     |
| OSU-ERb-12 (3µmol/L)          | 0.050162       | 502.12-515.88     | 0.180841       | 533.9786-569.3546 |
| OSU-ERb-12 (5µmol/L)          | 0.001899       | 315.0875-350.2457 | 0.011064       | 107.4305-227.2361 |
| LY500307 (3µmol/L)            | 0.003087       | 96.5738-152.7594  | 0.014908       | 316.7503-437.9163 |
| LY500307 (5µmol/L)            | 0.000701       | 0                 | 0.005          | 21.04-24.93       |

**Supplemental Table 11.** p-values and 95% confidence intervals (CIs) were determined for assessing the cell migration ability in OSU-ERb-12- and LY500307-treated MCF7 cells. P-value (for percentage of cell migration) for each treatment was determined by comparing with the percentage of that in the corresponding control (DMSO treated) cells.

| <b>Cell Migration Assay</b> |                 |                 |
|-----------------------------|-----------------|-----------------|
|                             | <b>24 Hours</b> |                 |
| <b>Treatment</b>            | <b>p-value</b>  | <b>95% CI</b>   |
| Control                     |                 | 91.76-108.24    |
| OSU-ERb-12 (5µmol/L)        | 0.0004368       | 61.0140-69.5791 |
| OSU-ERb-12 (10µmol/L)       | 0.0026058       | 52.0192-62.1763 |
| LY500307 (5µmol/L)          | 8.438E-06       | 23.4626-36.1402 |
| LY500307 (10µmol/L)         | 2.756E-05       | 5.1938-11.0745  |



**Supplemental Table 12: Patient demographics.**

|                           | Overall<br>(n=37) |
|---------------------------|-------------------|
| <b>Age at diagnosis</b>   |                   |
| Median [min, max]         | 56 [35, 169]      |
| <b>Race</b>               |                   |
| Asian                     | 1 (3%)            |
| Black or African American | 1 (3%)            |
| White                     | 35 (95%)          |
| <b>Ethnicity</b>          |                   |
| NOT Hispanic or Latino    | 37 (100%)         |
| <b>BMI</b>                |                   |
| Median [min, max]         | 28 [19, 47]       |
| <b>Stage (pathologic)</b> |                   |
| I                         | 5 (14%)           |
| II                        | 8 (22%)           |
| III                       | 15 (41%)          |
| IV                        | 7 (19%)           |
| Unknown                   | 2 (5%)            |
| <b>Grade</b>              |                   |
| High grade (3)            | 7 (19%)           |
| Intermediate grade (2)    | 23 (62%)          |
| Low grade (1)             | 4 (11%)           |
| Unknown                   | 3 (8%)            |
| <b>ER status</b>          |                   |
| Positive                  | 37 (100%)         |
| <b>PR status</b>          |                   |
| Negative                  | 4 (11%)           |
| Positive                  | 33 (89%)          |
| <b>HER2 status</b>        |                   |
| Equivocal                 | 2 (5%)            |
| Negative                  | 34 (92%)          |
| Positive                  | 1 (3%)            |
| <b>Chemotherapy</b>       |                   |
| No                        | 8 (22%)           |
| Yes                       | 29 (78%)          |
| <b>Hormone therapy</b>    |                   |
| No                        | 1 (3%)            |
| Yes                       | 36 (97%)          |
| <b>Targeted therapy</b>   |                   |
| No                        | 20 (54%)          |
| Yes                       | 17 (46%)          |

# Figure S1

**A.**

## 4-OH Tamoxifen Treatment

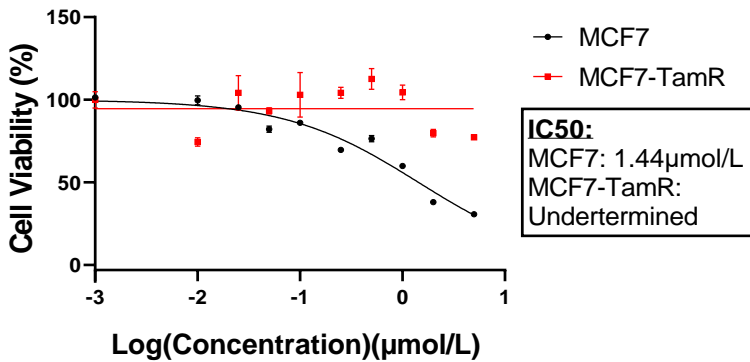

## 4-OH Tamoxifen Treatment

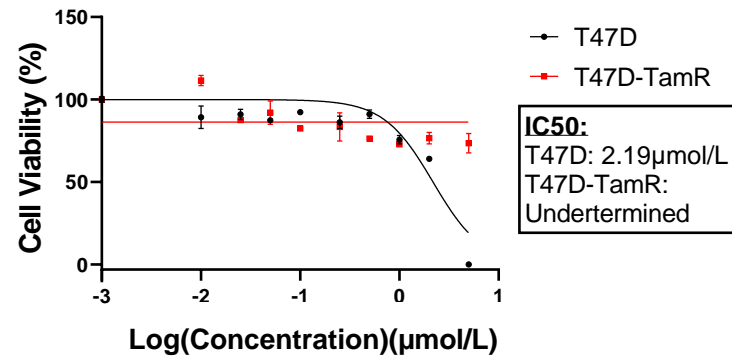

**B.**

## Fulvestrant Treatment

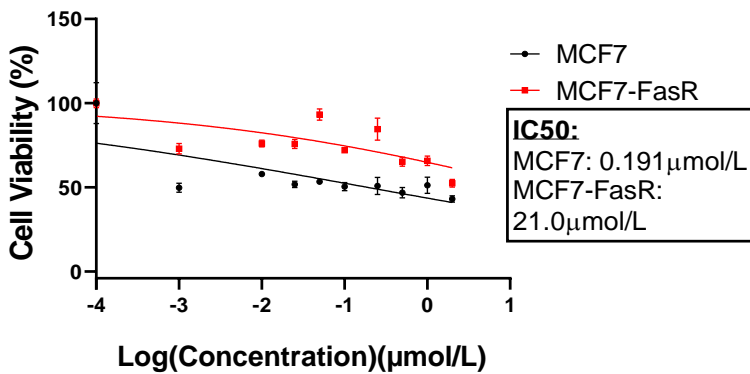

## Fulvestrant Treatment

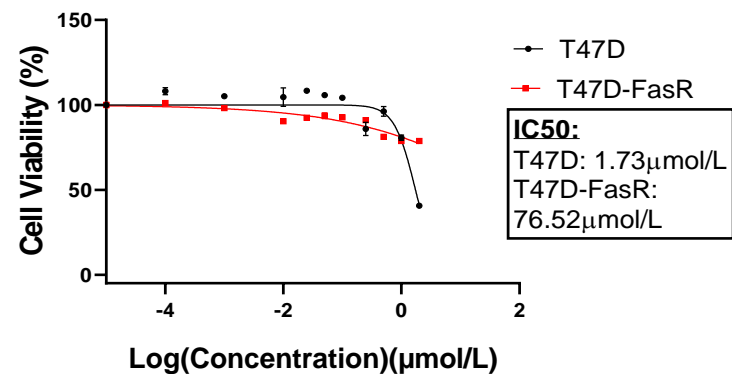

**C.**

## Abemaciclib Treatment

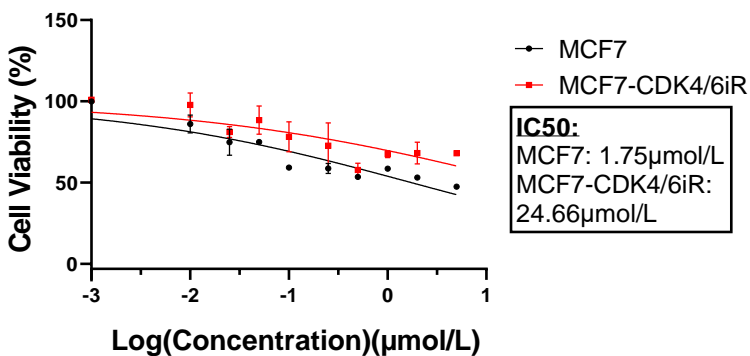

## Abemaciclib Treatment

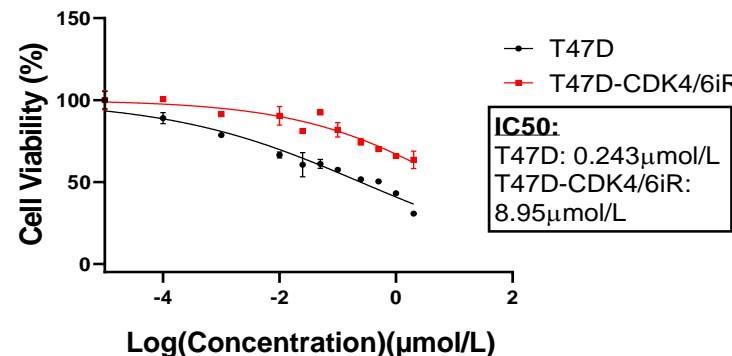

**Supplemental Figure S1.** Development of resistance in ER $\alpha$ + breast cancer cells after chronic exposure to estrogen receptor antagonists and CDK4/6 inhibitor. Resistance was induced by chronic exposure of MCF7 and T47D cell lines to estrogen receptor antagonists and CDK4/6 inhibitor. Control cells were treated with DMSO in parallel. Control and resistant cells were treated for 72 hours with different concentrations of the drugs as indicated and the cell viability was measured. The percentage of viable cells relative to DMSO (control) are shown as mean  $\pm$  SD. All the assays were performed in quadruplicate and repeated twice. Treatment with: **A**, 4-OH-tamoxifen **B**, fulvestrant **C**, abemaciclib.

**Figure S2**

**OSU-ERb-12**

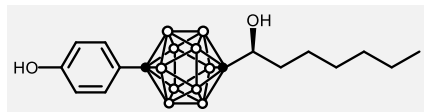

(*R*)-1-[1-(4-Hydroxyphenyl)-1,12-dicarb-*c*loso-dodecaborane-12-yl]heptan-1-ol.

Black dots are carbon, white dots represent B-H

**MCSR-18-006**

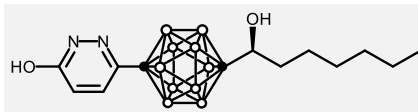

**LY500307**

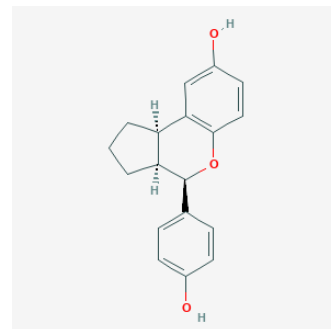

**4-OH-Tamoxifen**

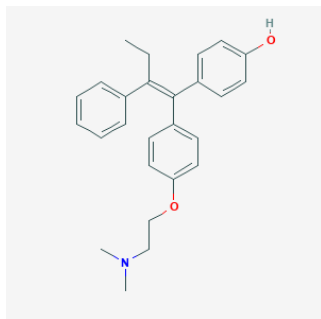

**Elacestrant**

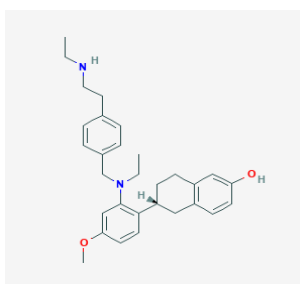

**Fulvestrant**

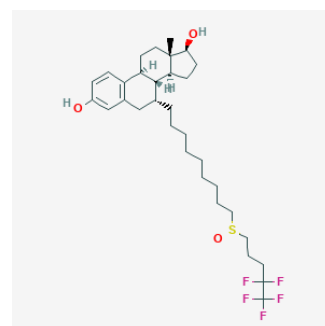

**DPN (Diarylpropionitrile)**

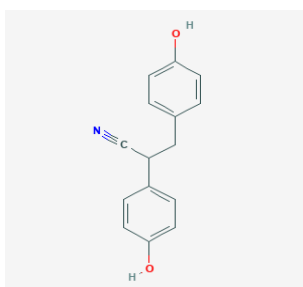

**AC186**

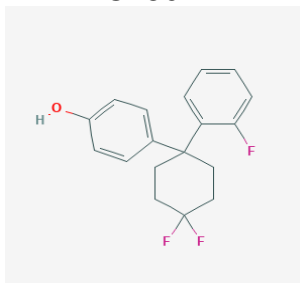

**WAY 200070**

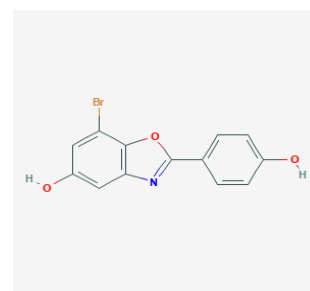

**MPP (Methyl-piperidino-pyrazole)**

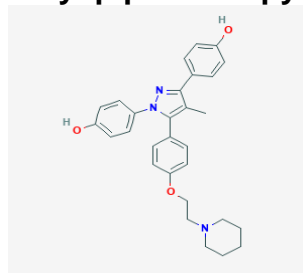

**Supplemental Figure S2.** Chemical Structures of the inhibitors used in the study

**Figure S3**

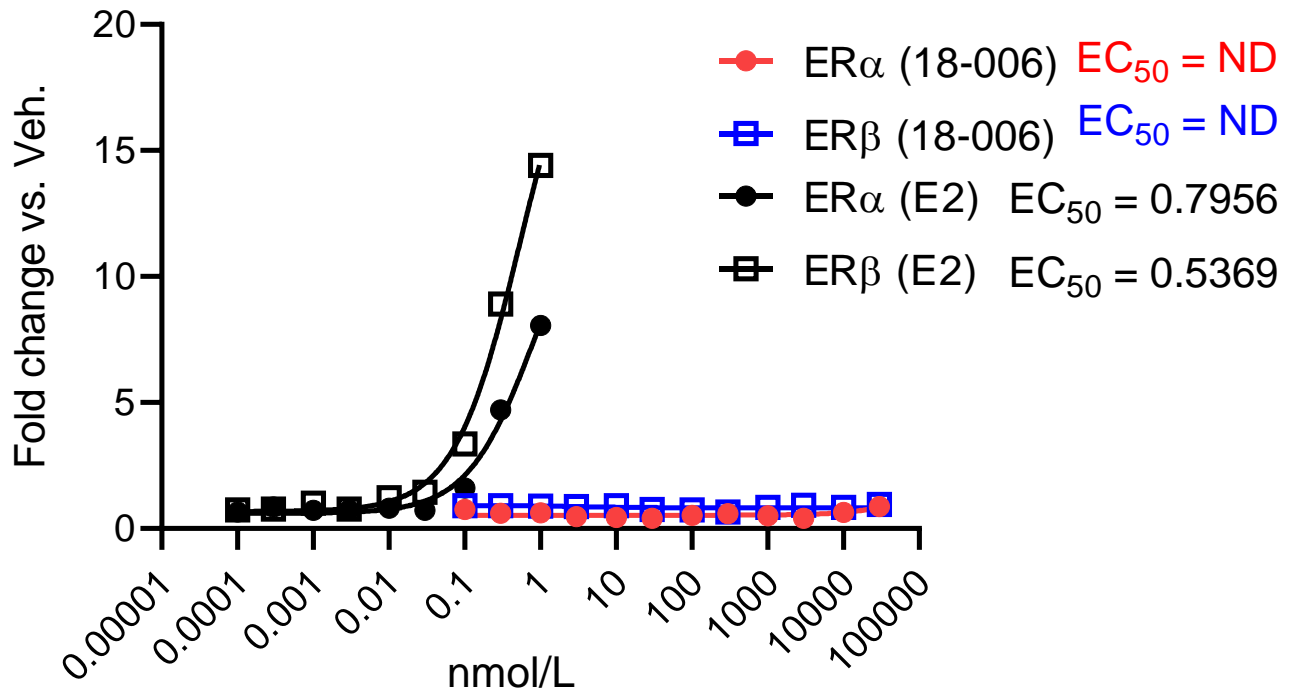

**Supplemental Figure S3.** ER $\alpha$ /ER $\beta$  driven ERE-Luciferase promoter activity is unaffected by MCSR-18-006, the chemical analog of the ER $\beta$  specific agonist OSU-ERb-12. The cell viability was measured in extracts prepared from human full-length ER $\alpha$  or ER $\beta$  expressing Sf9 cells in presence of vehicle or different concentrations of estrogen (E2) or MCSR-18-006 as indicated. Fold change in cell viability was determined by comparing with the vehicle control.

## Figure S4

### Radio-ligand Displacement Assay

DES (+) control

#### Reference Compound

| Assay Name           | Reference Compound | IC <sub>50</sub> |
|----------------------|--------------------|------------------|
| Estrogen ER $\alpha$ | Diethylstilbestrol | 1.32 nmol/L      |
| Estrogen ER $\beta$  | Diethylstilbestrol | 1.06 nmol/L      |

ER $\alpha$ : IC<sub>50</sub> = 1.32 nmol/L, K<sub>i</sub> = 0.38 nmol/L

ER $\beta$ : IC<sub>50</sub> = 1.06 nmol/L, K<sub>i</sub> = 0.22 nmol/L

### Radio-ligand Displacement Assay

MCSR-18-006: Test Compound

#### Test Compound Experimental Results

| Assay Name           | Batch * | Spec. | Rep. | Conc.           | % Inh. | IC <sub>50</sub> * | K <sub>i</sub> |
|----------------------|---------|-------|------|-----------------|--------|--------------------|----------------|
| Estrogen ER $\alpha$ | 461679  | hum   | 2    | 100 $\mu$ mol/L | 24     | >100 $\mu$ mol/L   |                |
|                      |         | hum   | 2    | 10 $\mu$ mol/L  | 6      |                    |                |
|                      |         | hum   | 2    | 1 $\mu$ mol/L   | 3      |                    |                |
|                      |         | hum   | 2    | 0.1 $\mu$ mol/L | 8      |                    |                |
|                      |         | hum   | 2    | 10 nmol/L       | -6     |                    |                |
|                      |         | hum   | 2    | 1 nmol/L        | 3      |                    |                |
|                      |         | hum   | 2    | 0.1 nmol/L      | 1      |                    |                |
|                      |         | hum   | 2    | 10 pmol/L       | 4      |                    |                |
| Estrogen ER $\beta$  | 461680  | hum   | 2    | 100 $\mu$ mol/L | 39     | >100 $\mu$ mol/L   |                |
|                      |         | hum   | 2    | 10 $\mu$ mol/L  | 8      |                    |                |
|                      |         | hum   | 2    | 1 $\mu$ mol/L   | -2     |                    |                |
|                      |         | hum   | 2    | 0.1 $\mu$ mol/L | 0      |                    |                |
|                      |         | hum   | 2    | 10 nmol/L       | -7     |                    |                |
|                      |         | hum   | 2    | 1 nmol/L        | 5      |                    |                |
|                      |         | hum   | 2    | 0.1 nmol/L      | 4      |                    |                |
|                      |         | hum   | 2    | 10 pmol/L       | -3     |                    |                |

**Supplemental Figure S4.** Radio-ligand displacement assay demonstrated insignificant binding of the non-specific chemical analog MCSR-18-006, to ER $\alpha$ /ER $\beta$ . Recombinant human full-length ER $\alpha$  and ER $\beta$  were expressed in Sf9 cells, prepared the cell lysates, and the relative binding affinity of MCSR-18-006 was measured by radiolabeled <sup>3</sup>H estradiol competition binding assays. The IC<sub>50</sub> the reference compound diethylstilbestrol was more than 100-fold less compared to MCSR-18-006 towards both ER $\alpha$  and ER $\beta$ . The binding affinities (K<sub>i</sub>s) of the reference compound for ER $\alpha$  and ER $\beta$  were 0.38 nmol/L and 0.22 nmol/L. The binding affinity value of MCSR-18-006 for ER $\alpha$  or ER $\beta$  could not be determined.

# Figure S5

**A.**

Exon Map of Isoforms in *ESR2*

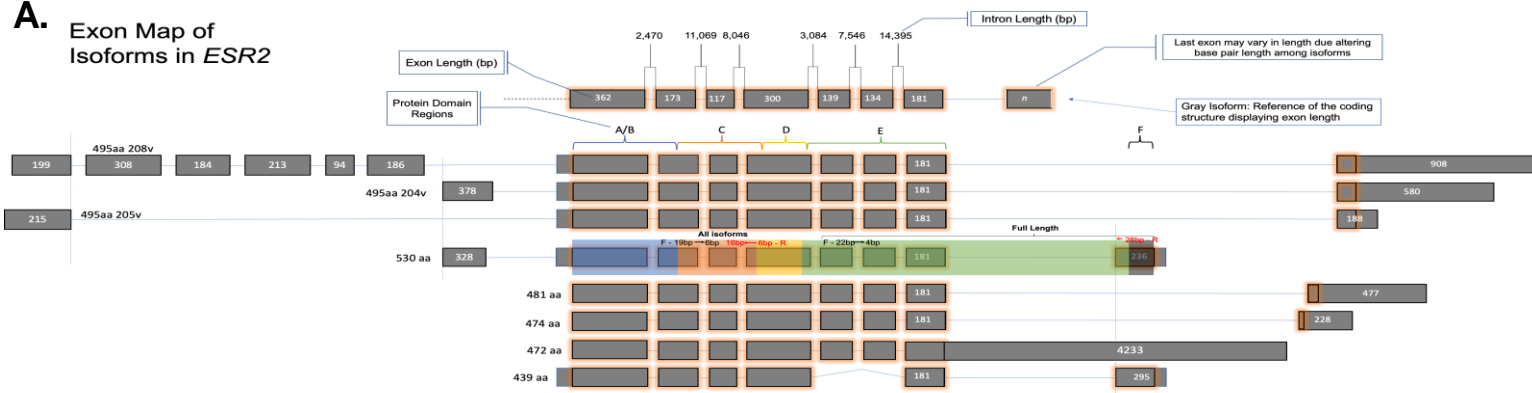

**B.**

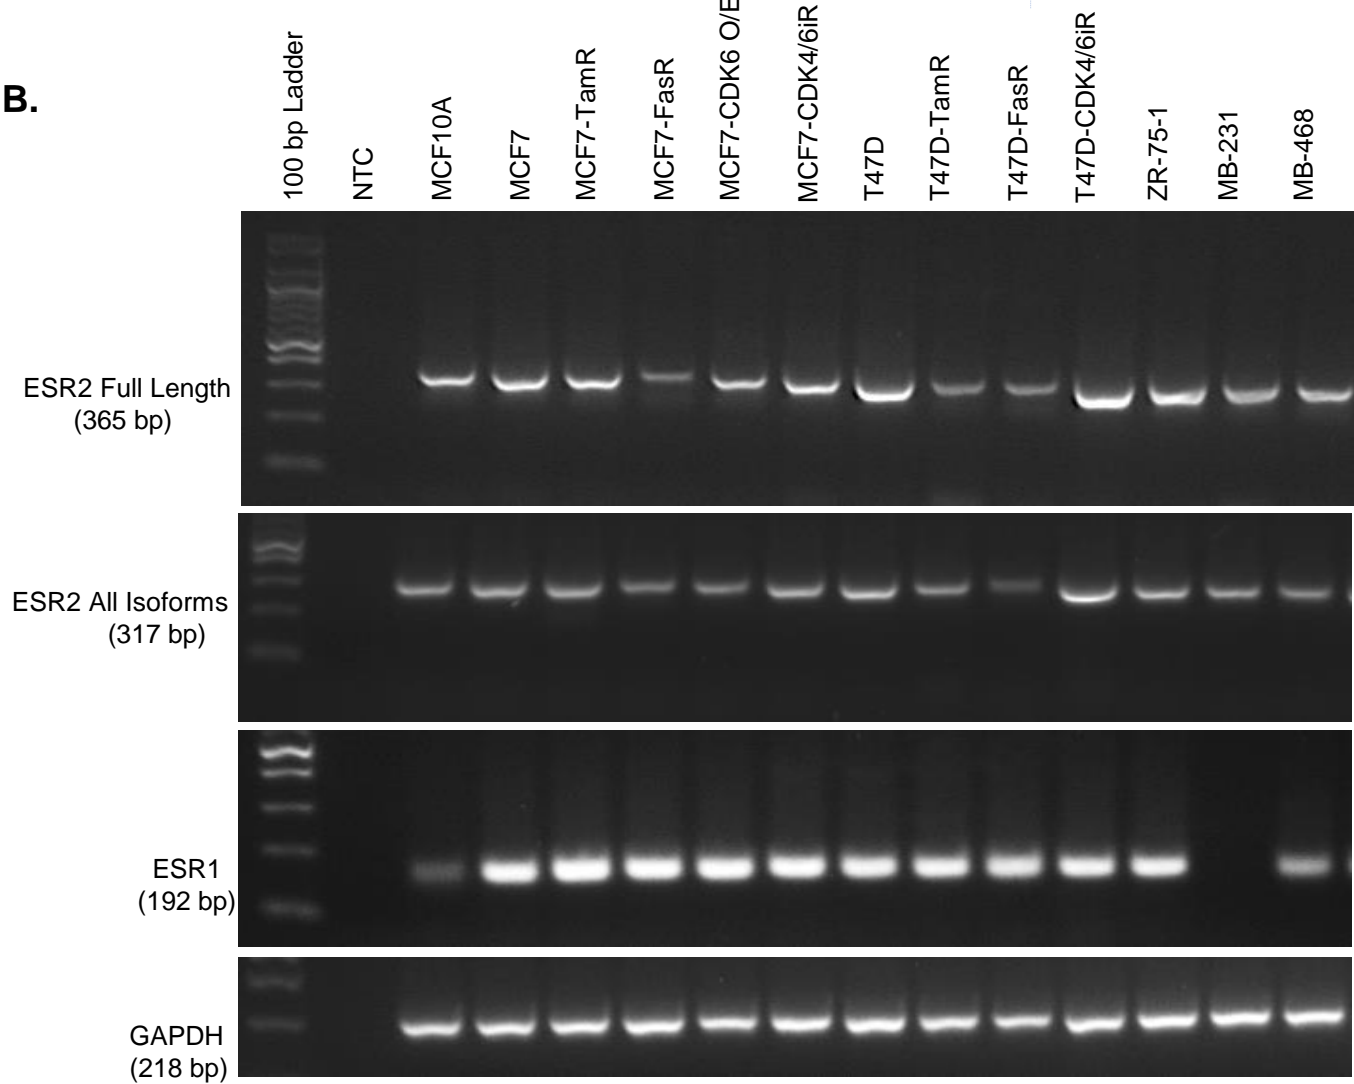

**Supplemental Figure S5. A,** Schematic diagram of primer design for qRT-PCR amplification of full length and all isoforms of *ESR2* gene. **B,** Agarose gel electrophoresis of qRT-PCR products of *ESR2* full length, all isoforms, *ESR1*, and *GAPDH* showing a single band (of projected length) of corresponding gene product demonstrated specificity of the primers used in the study. qRT-PCR products of the indicated genes with the RNA isolated from the cell lines were separated on 2% agarose gels, stained with Gel Green dye, and photographed. Each assay was done in triplicate and repeated twice. Similar results were obtained. A representative picture of each gene product has been shown.

**Figure S6**

**A.**

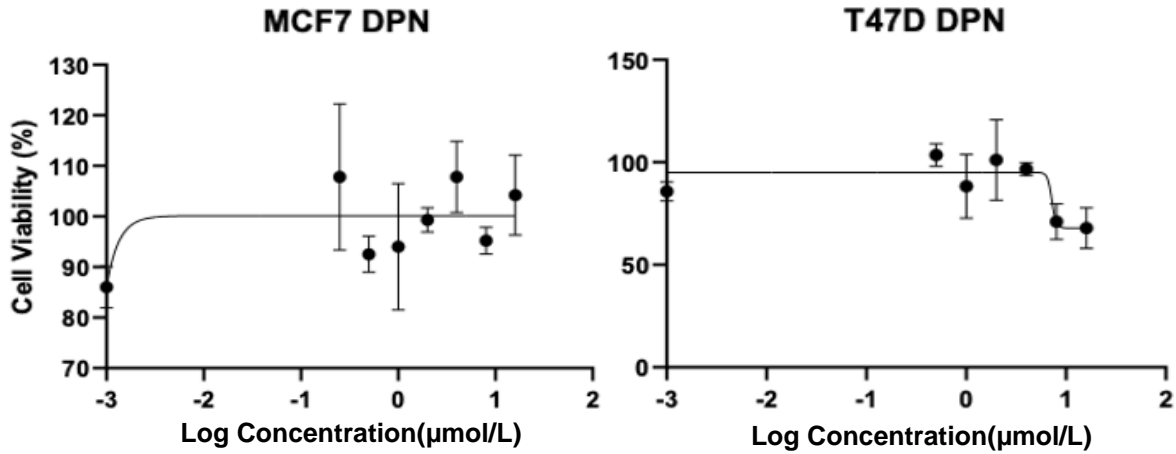

**B.**

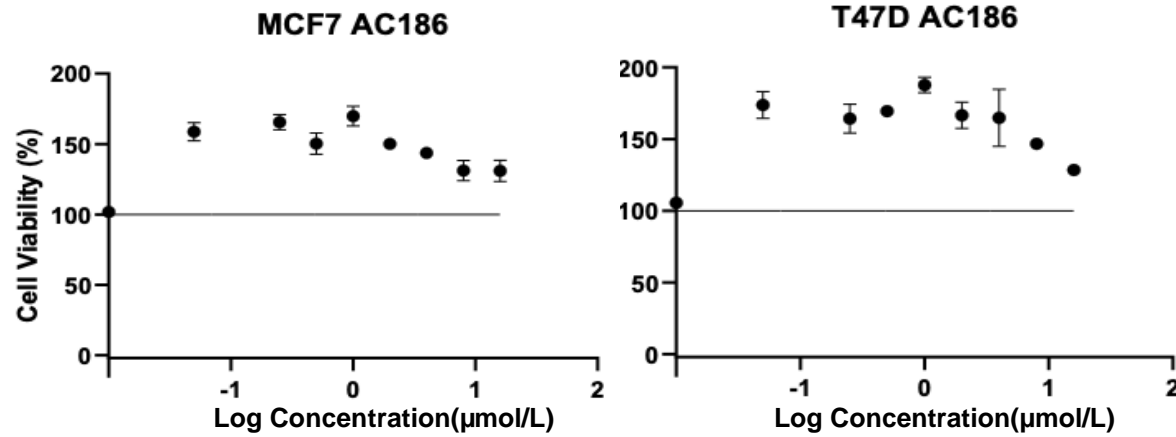

**C.**

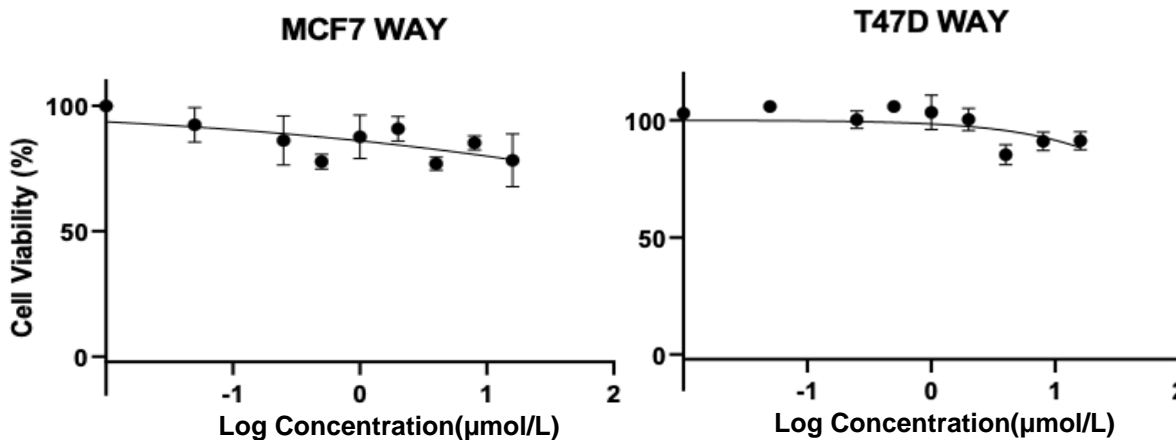

**Supplemental Figure S6.** Less selective ER $\beta$  agonists did not reveal cytotoxicity in ER $\alpha$ + breast cancer cell lines. Cell viability assays were performed after 7 days of treatment of MCF7 and T47D cells with the agonists. Cell viability was determined relative to the viable cells upon treatment with the vehicle control (DMSO). Each assay was performed in quadruplicate and repeated twice. Data was presented as mean  $\pm$  SD. Similar results were obtained. Representative data has been presented. Treatment with: **A**, DPN **B**, AC186 **C**, WAY200070.

# Figure S7

**A.**

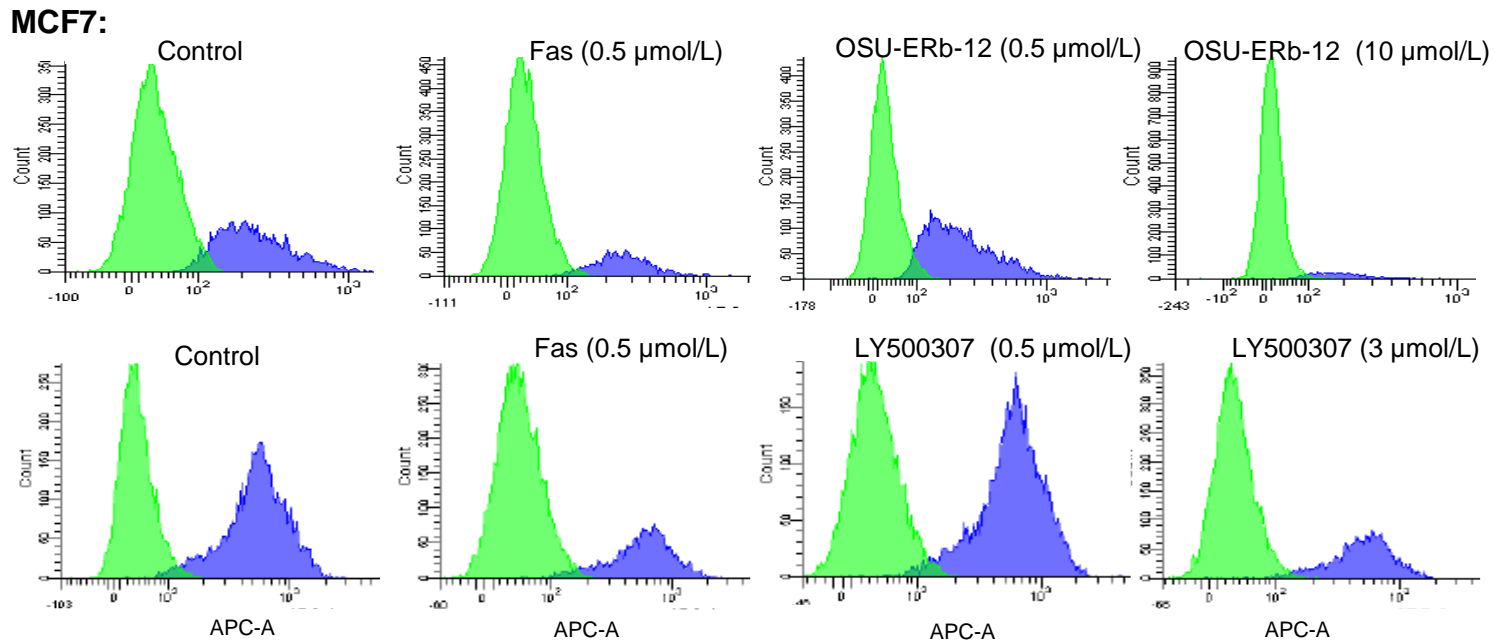

**B.**

**T47D:**

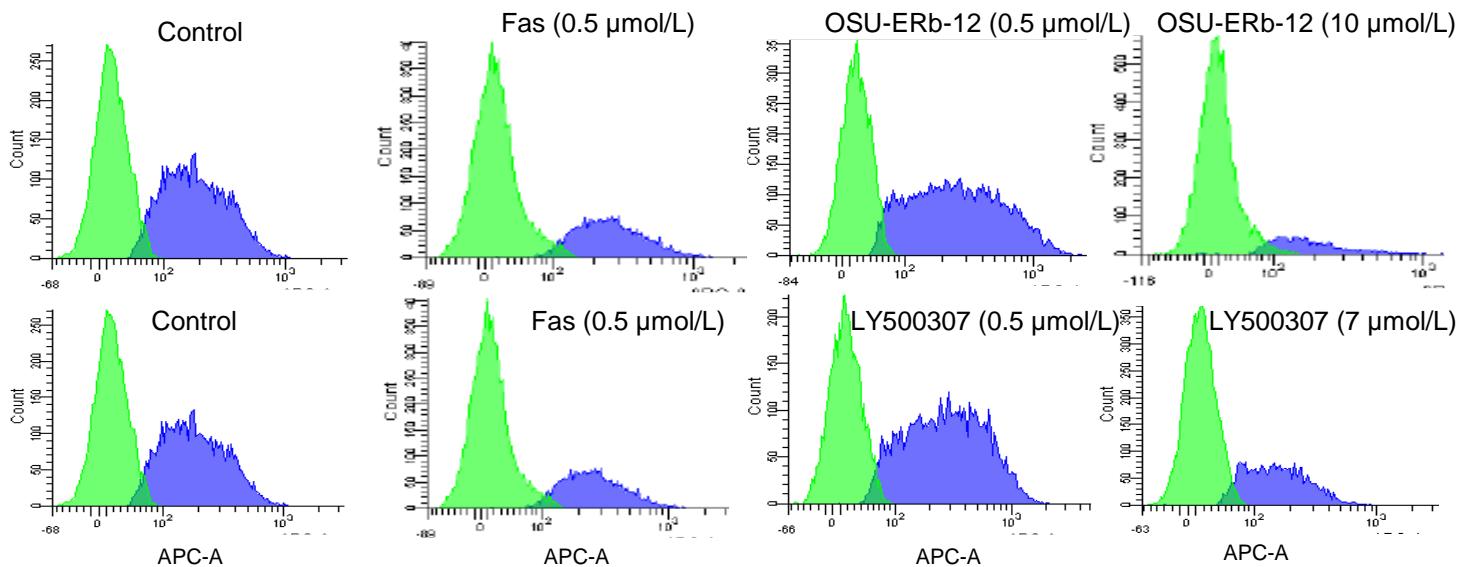

**Supplemental Figure S7.** Specific ER $\beta$  agonists OSU-ERb-12 and LY500307 inhibited proliferation of ER $\alpha$ + breast cancer cells. Cell proliferation was measured after treatment with DMSO (control), fulvestrant, OSU-ERb-12 or LY500307 for 3 days. Washed cells were processed and proliferation was measured by FACS analysis as described in detail before (Materials and Methods). Each experiment was done in triplicate and repeated twice. Similar results were obtained. A representative profile has been presented. **A**, MCF7 **B**, T47D.



# Figure S8

## Cell Cycle Analysis

**A.**

**MCF7:**

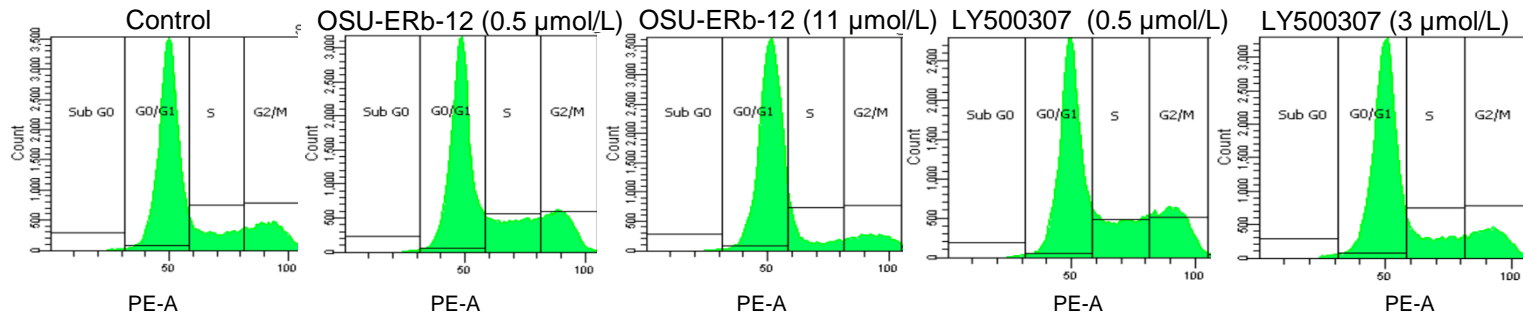

**B.**

**T47D:**

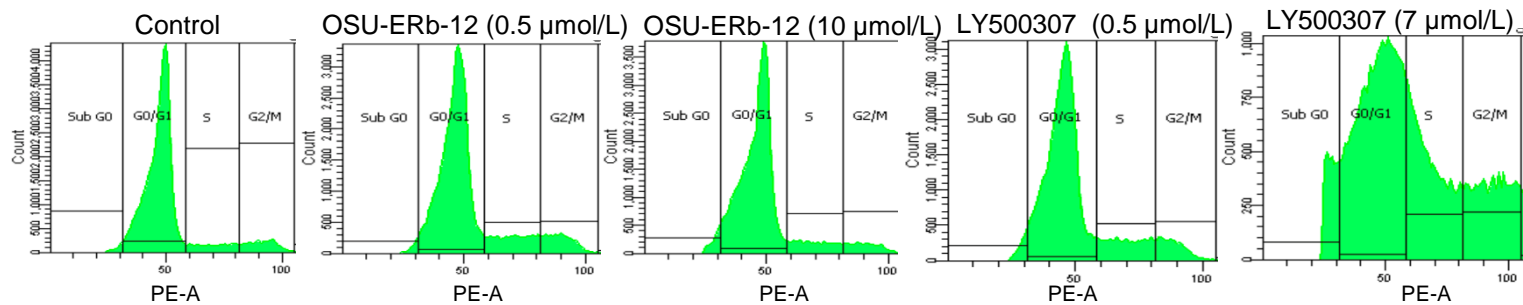

**Supplemental Figure S8.** Specific ER $\beta$  agonists OSU-ERb-12 and LY500307 caused S and/or G2/M phase arrest in ER $\alpha$ + breast cancer cells. Cell cycle analyses were performed after treatment of cells with DMSO (control), OSU-ERb-12 or LY500307 for 3 days. Washed cells were processed and cell cycle profile was measured by FACS analysis as described in detail before (Materials and Methods). Each experiment was done in triplicate and repeated twice. Similar results were obtained. A representative profile has been presented. **A,** MCF7 **B,** T47D.

# Figure S9

## MCF7

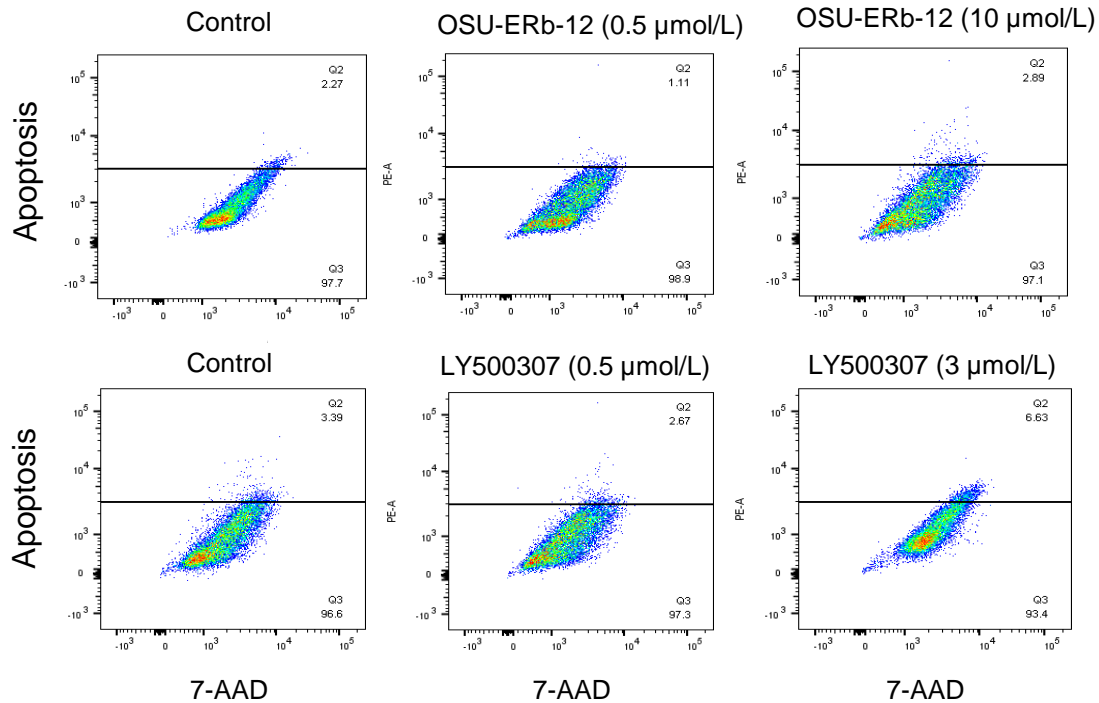

## T47D

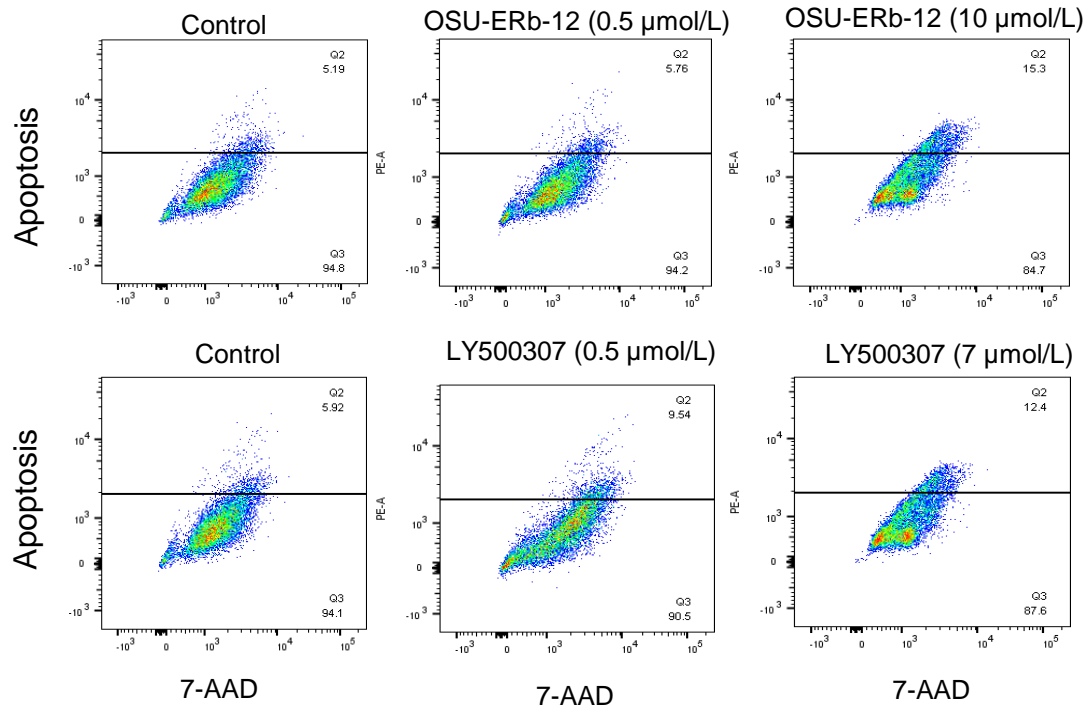

**Supplemental Figure S9.** Specific ER $\beta$  agonists OSU-ERb-12 and LY500307 induced apoptosis in ER $\alpha$ + breast cancer cells. Apoptosis was measured after treatment of cells with DMSO (control), OSU-ERb-12 or LY500307 for 48 hours. Washed cells were processed, stained and apoptosis was measured by FACS analysis as described in detail before (Materials and Methods). Each experiment was done in triplicate and repeated twice. Similar results were obtained. A representative profile has been presented. **Top, MCF7 Bottom, T47D.**
