# Supplementary material for: Activity of Estrogen Receptor β Agonists in Therapy-Resistant Estrogen Receptor-Positive Breast Cancer
Source: Front Oncol. 2022 Apr 25;12:857590. doi: 10.3389/fonc.2022.857590 (PMC9097292; doi:10.3389/fonc.2022.857590)
Supplement: Supplementary file 2 [file Table_13.xlsx]

## Sheet: RNAseq_Avatar_Cherian
gene_id	1	2	3	4	5	6	7	8	9	10	11	12	13	14	15	16	17	18	19	20	21	22	23	24	25	26	27	28	29	30	31	32	33	34	35	36	37	38
1/2-SBSRNA4	0	0.0436326	0	0	0	0	0.107844	0	0	0.0228553	0.0373858	0.0205413	0	0	0	0.0212731	0	0	0.0198368	0	0	0	0	0	0	0	0.00969159	0	0	0	0	0.0467757	0.0136854	0.0342996	0.0559209	0.0185431	0.0146266	0.0325714
A1BG	2.92668	1.10328	4.07458	1.4049	5.15003	4.02459	0.76418	0.722193	0.970326	6.28049	2.04349	4.42317	4.94834	1.77136	4.32643	1.12979	2.18199	3.50288	1.05154	1.62438	3.87655	1.17601	4.12926	1.94119	1.63467	2.00721	3.55527	7.91682	2.79287	3.06664	1.81367	5.64241	2.60128	6.17443	2.50234	8.48458	2.60905	1.76917
A1BG-AS1	0.501121	1.63232	2.8104	1.37033	0.364983	3.97367	2.22409	2.22702	4.90171	14.7304	2.00275	1.99653	2.99681	0.652396	1.3579	1.67991	1.49889	12.8534	1.67642	0.869521	0.591416	0.620514	0.454543	0.236316	0.270219	0.604355	0.433052	0.21059	0.486265	0.234792	1.86095	2.45062	1.98578	2.66323	1.64948	3.77948	2.26394	1.94386
A1CF	0.00763046	0	0	0.00971117	0.00144174	0.0063958	0.00195288	0	0	0.00206179	0.00495467	0	0.0383112	0	0.00237877	0.00567681	0.039285	0.00396442	0.0105543	0	0.0299694	0.0217941	0.000757248	0.00163064	0.000719528	0.00235106	0.00413918	0.00281176	0.0276997	0.000942641	0.000959571	0.017865	0.0012303	0.0195635	0.0211248	0	0.0078531	0.0217099
A2LD1	0.175332	0.0421743	0.188381	0.0846545	0.143161	0.0617483	0.211613	0.0179405	0	0.02235	0.0719829	0.118425	0.217871	0.181992	0.0257476	0.26691	0.0950976	0.19295	0.197847	0.15094	0.0531556	0.0708483	0.193298	0.149608	0.0556202	0.18114	0.136669	0.0929907	0.163914	0.171917	0.0628249	0.0873717	0.0712291	0.0297548	0.17089	0.24554	0.0852576	0.0580099
A2M	160.996	217.491	105.388	81.6251	244.993	384.782	76.7084	85.0877	122.549	89.9198	82.6142	58.3173	178.632	111.407	103.413	113.071	218.228	70.8665	251.563	799.022	160.979	420.049	337.091	353.978	246.502	75.5409	124.711	203.961	106.223	236.697	97.4974	96.2847	180.614	177.996	169.157	65.7734	117.188	139.319
A2ML1	0.078251	0.0245522	0.479941	0.0527324	0.291124	6.41493	3.1507	1.89367	0.0448509	0.718087	0.120112	0.158921	0.287487	0.218432	0.493518	0.175293	0.158738	0.00716143	0.229249	0.428327	0.177245	0.0635806	0.0479289	0.370202	0.14181	0.0149444	0.122043	0.105707	6.36627	0.0668965	2.57874	0.544944	0.166303	0.137889	0.395315	0	0.127696	0.070671
A2MP1	0	0	0.0203051	0	0	0	0	0.0141372	0	0.0176424	0	0	0	0.0142695	0	0.0163592	0.0189639	0	0	0	0	0	0	0	0	0	0	0	0	0	0	0	0	0	0	0	0	0
A4GALT	4.74162	8.74901	9.1701	4.21889	2.24744	5.43793	10.3068	5.01127	8.09127	8.20337	10.5048	3.21106	5.29104	8.9653	3.2776	4.17968	5.3232	2.52627	8.02572	9.43398	4.97293	8.08424	6.63815	5.12759	1.83981	2.69531	1.47539	5.27563	15.5736	5.7976	10.8197	6.5327	8.97144	39.3158	4.88952	3.8995	6.67914	4.9274
A4GNT	0.00740469	0.28314	0.396951	0.196954	0	0.310472	0.35916	0	0.992198	0.287745	0.0930219	0.0102072	0.11235	0.513914	0	0.0956303	0.208922	0.583877	0.029669	0.00944165	0	0	0.0792391	0.00934818	0.00829257	0.00673698	0	0.0107592	0.0309338	0.0489541	0.124508	0.0645894	0.0343943	0.080465	0.117992	0	0.0659421	0.170683
AA06	0	0	0	0	0	0	0	0	0	0	0	0	0	0	0	0	0	0	0	0	0	0	0	0	0	0	0	0	0	0	0	0	0	0	0	0	0	0
AAA1	0	0	0	0	0	0	0	0.00330879	0	0.0288589	0	0.0072488	0	0.000899481	0	0	0	0	0	0	0	0	0	0	0	0	0	0	0.0015465	0	0	0	0	0	0	0	0	0.00289362
AAAS	52.8648	40.8352	49.0512	38.538	36.3366	36.8274	47.0835	34.3334	52.8348	50.5907	37.497	43.0465	50.2917	34.991	49.1675	32.7617	29.1981	44.9214	26.2573	40.2511	36.1382	50.0065	29.9944	18.1742	34.9367	42.1094	40.4963	41.1506	36.7832	36.4416	33.2637	33.3843	43.3048	45.7471	36.6458	38.7423	37.1574	39.1602
AACS	12.547	6.77813	3.513	5.00932	11.0814	4.81287	17.664	15.5573	5.19253	5.30154	7.99193	8.03868	7.94931	4.18838	5.74622	3.28087	4.2513	4.4897	6.14675	6.65887	9.9773	6.14688	12.6018	7.21033	5.44435	9.79522	11.7754	5.56732	6.91167	11.3054	5.93278	10.3778	10.4187	6.66871	3.58674	11.8919	3.5464	4.40946
AACSP1	0	0	0	0	0	0	0.0961873	0	0	0	0	0	0.0245817	0	0	0	0.0196914	0.00127156	0	0	0	0	0	0	0	0	0	0	0.0105717	0.00433371	0	0	0	0.000230713	0	0	0	0.00162896
AADAC	0.0330592	1.34537	0.412037	0.121832	0.0277799	0.239129	0.108887	0.595175	2.27317	1.22856	0.258921	0.295524	0.818153	0.560585	2.77905	0.520315	0.670498	3.0607	2.12467	0.374222	0.228622	0.164369	1.63918	0.48515	0.00926105	0.0150374	0	0.00600371	0.123338	0.261249	0.397831	0.22205	1.25462	0.108661	0.443679	0	0.407577	1.04937
AADACL2	0.116106	2.13027	0.618468	0.223396	0.0800734	0.0716006	0.0781992	0.309535	0.459812	1.30992	0.189898	0.183911	1.40863	1.88916	6.25546	0.816013	1.15122	4.31171	2.9204	0.284854	0.313814	0.447016	0.0479424	0.112741	0	0.00812431	0.0342581	0	0	0	1.39788	0.577151	1.02224	0.303066	1.0977	1.90718	0.887472	2.04845
AADACL3	0	0	0	0	0	0.0249148	0	0	0	0	0	0	0	0	0	0	0.0108147	0	0	0	0	0	0.00569152	0	0	0	0	0	0	0	0.0539735	0	0	0.0381614	0	0	0	0.0035826
AADACL4	0	0	0	0	0.0189344	0	0	0	0	0	0	0	0	0	0	0	0	0	0.0674865	0	0.00631673	0.00454309	0	0.00533298	0	0	0	0	0	0	0	0	0	0	0	0	0.00832762	0.00924258
AADAT	1.19065	5.25853	1.47024	1.16837	0.840885	1.24699	5.84275	4.6644	2.36975	1.11645	3.74973	0.380146	4.98653	2.55297	0.582134	2.05946	4.25469	4.16089	4.43821	1.7975	0.534371	1.60477	1.01834	1.8884	0.56697	0.411215	0.183979	0.0754364	0.663368	0.698552	2.84041	1.47982	1.55125	2.48164	2.20795	0.0313845	2.1856	1.98538
AAGAB	29.475	5.88825	11.8228	9.28927	18.2538	9.51202	9.43882	13.3052	3.52677	13.9303	12.0443	10.4907	16.9598	15.4901	7.56029	15.4995	9.09627	9.01619	7.98142	11.3809	18.9196	14.008	21.5513	18.9221	19.0675	50.5972	22.729	31.0913	24.5162	23.4899	12.5928	15.9347	11.9907	12.9065	9.75467	4.88183	12.8962	13.629
AAK1	2.00054	3.72258	2.86276	3.00619	2.07736	2.7811	1.70818	2.55736	4.23272	3.48203	3.88397	2.39062	3.36095	3.98174	2.80537	3.56286	4.45532	3.32393	3.60232	3.40763	2.4531	2.68882	2.55787	1.93164	3.04564	3.39007	3.24367	2.36071	3.22135	1.69201	3.08977	1.96734	2.59676	2.82729	2.76686	3.17641	3.25101	2.84528
AAMP	57.3678	19.351	23.0049	18.1468	29.4063	28.4779	31.8995	25.6045	16.2604	19.3076	20.7643	26.4647	23.229	20.7842	15.0281	18.4829	16.8838	8.00132	18.8465	38.3985	31.4255	38.0221	29.8841	43.6467	38.248	51.0359	49.93	52.5804	63.1179	39.7398	22.5596	36.3445	36.178	48.7739	48.6772	73.4012	27.4681	22.0127
AANAT	0.0279361	0.02003	0.0365253	0.0905427	0	0.208716	0.170304	0	0.0677001	0.0210927	0.0855267	0.00938366	0.131538	0.646946	0	0.11727	0.0564945	0.20112	0.0363766	0.0803289	0	0.0075887	0	0.0260963	0.04681	0	0	0	0.0334014	0	0.0100283	0.0486256	0.0378789	0.347127	0.226536	0.278278	0.175338	0.00125448
AARS	77.9564	59.3433	41.2804	51.1033	49.1162	281.222	80.966	67.9748	36.1586	38.6075	64.5086	32.3051	70.7624	126.248	35.6184	40.7676	48.759	37.2334	55.4526	77.5322	82.3869	79.9892	98.0266	64.6963	65.1545	43.2705	147.802	45.8032	143.814	107.902	59.4536	52.0557	63.776	96.3841	57.0309	59.0364	74.2066	58.2696
AARS2	4.22965	4.73572	7.37018	6.53991	3.11685	7.22162	3.68489	7.05006	4.99477	4.7237	3.40257	4.31345	4.70571	5.49032	4.11937	3.87549	3.72234	5.26974	3.62523	6.18972	6.7302	6.33898	2.72465	2.72736	2.73201	3.8891	4.11589	2.39734	3.25716	3.08322	3.74028	3.93633	6.4653	7.95848	6.20963	18.8231	7.46833	3.59035
AARSD1	17.0357	8.78801	6.46757	7.52865	3.68299	7.72912	13.0555	12.2354	4.81479	8.35862	8.18112	10.2191	8.41979	11.64	13.4594	4.06579	7.49127	7.60549	6.29602	8.04653	7.6263	11.3903	10.9645	6.53358	6.92061	9.1637	11.4712	14.5847	12.3708	10.2471	8.06206	7.43019	12.0261	13.2518	10.0145	12.6152	6.49967	5.53945
AASDH	6.5079	10.1886	6.91298	7.65029	5.15792	4.05392	7.86039	6.69148	10.1379	7.78655	9.85149	9.44006	9.3442	8.00776	13.4988	9.67646	7.2211	8.53195	8.01449	5.46295	3.4544	6.55566	5.98806	7.09567	6.37145	6.81323	5.39634	8.48253	4.75057	4.20938	7.67394	6.1525	6.72216	2.82767	10.4366	1.21221	5.30621	7.30188
AASDHPPT	5.87115	2.75078	2.65245	4.47333	4.86504	2.91342	2.59762	3.80063	2.13064	3.13202	3.6092	4.22639	1.96517	4.05255	1.5287	2.35386	2.46816	1.59778	3.04712	3.82867	2.69086	3.09567	10.6643	4.26658	5.00496	5.34779	4.12937	3.44135	4.34636	6.71175	3.51662	3.41731	2.99764	2.10453	3.10883	1.56084	2.38479	2.7826
AASS	1.22364	25.7446	6.08327	4.21977	4.24129	4.09822	1.18272	3.62446	15.7552	12.3505	6.42869	3.50692	7.91471	10.9308	6.54394	4.83342	14.6587	15.4217	23.5843	7.30427	1.42465	10.8578	4.1984	5.99745	1.05426	4.52219	8.87682	3.57411	4.39266	3.91037	7.32438	2.24738	13.6642	7.23773	5.11929	6.64954	8.97514	7.06783
AATF	56.6954	17.892	11.8598	20.3166	18.5495	25.0055	32.8859	29.1234	31.5106	24.2637	21.3253	26.4884	29.4766	23.7096	29.4192	25.6658	17.0819	21.5274	27.9633	22.2238	26.5	22.1022	31.5164	23.836	34.1727	30.332	38.366	25.8613	33.117	20.1267	26.3726	49.9453	27.6317	53.507	67.8945	34.2399	18.1194	17.9478
AATK	0.171799	0.0680288	0.109251	0.14714	0.0802981	0.448691	0.138011	0.418323	0.521345	0.407334	0.332978	0.194061	0.222276	0.506108	0.109874	0.0702422	0.150447	0.350874	0.108823	0.18805	0.250665	0.10309	0.345021	0.228536	0.0387511	0.032696	0.222003	0.0283113	0.0599349	0.0234555	0.157998	0.120171	0.124974	0.241776	0.190048	4.31373	0.0739535	0.11522
AATK-AS1	0	0	0	0	0	0.0813178	0	0	0.266958	0.0130542	0.0422697	0	0.0115926	0	0	0.0361943	0	0.112384	0	0	0	0	0.0100538	0	0	0.00767523	0	0	0	0	0.0246017	0.0199869	0	0.00652029	0.00637469	0	0	0.0369186
ABAT	10.5416	2.90423	13.0418	10.8346	32.9322	1.65864	4.69392	13.0493	2.99173	25.2999	12.2512	11.254	10.5314	2.29094	9.93061	5.05857	5.01158	9.56089	9.05014	9.39025	13.7231	9.50225	7.36974	6.93022	6.04219	209.896	15.4932	21.3396	9.70494	39.389	10.6381	17.0088	16.0445	6.55952	1.9547	12.7941	3.98601	19.3863
ABCA1	31.177	36.4556	12.9395	22.0833	38.0896	18.61	16.9633	21.7215	36.0693	16.0405	17.5822	8.78347	23.9624	26.9139	8.27979	16.3783	36.0716	14.7918	22.9878	50.9508	16.4104	13.0127	22.6411	35.2772	19.3491	4.89919	7.2512	19.4295	21.6547	14.1355	26.0391	16.301	27.7955	38.9669	12.8118	9.74961	22.9343	16.9341
ABCA10	0.345138	29.0723	4.97564	0.622246	1.62069	2.11749	1.76435	0.5524	17.3053	5.02604	1.24867	1.98444	9.88138	7.2337	5.80005	3.4973	12.4253	5.22455	25.4622	6.85013	0.572995	4.65186	1.9647	1.57028	0.268596	0.194804	0.199914	0.0518575	0.195818	0.528134	1.6585	1.54345	7.80332	4.1309	5.69036	0.490945	4.18807	8.01637
ABCA11P	7.77924	11.8819	16.8906	13.0764	5.42471	7.61094	6.71372	16.1065	6.58816	7.42466	7.44816	8.06152	9.13716	12.0157	4.44467	7.55589	4.94699	11.3384	10.3747	7.73678	6.30917	6.37382	3.4283	3.65562	4.55019	6.3917	2.74088	6.56213	2.50279	4.94705	5.40982	3.54753	8.2814	6.38867	12.0237	9.40242	12.143	7.3845
ABCA12	17.7593	0.877632	12.5852	3.80132	13.4116	0.133814	17.1253	9.87201	1.00663	7.04543	0.53558	6.51681	9.68783	0.53778	1.86727	8.67627	2.73348	5.22627	1.81421	1.93169	17.0192	5.54376	1.66891	1.44467	85.5977	0.526425	55.4701	7.1932	17.1013	11.6348	4.63147	1.61426	1.21802	0.74211	0.898145	5.09351	5.44043	8.72353
ABCA13	0.00207196	0.190448	0.0515783	0.021847	0.0455258	0.477734	0.0463432	0.0666657	0.0865429	0.0531254	0.0121672	0.0134468	0.0198723	1.01469	0.00404657	0.0134377	0.0937769	0.0696761	0.207314	0.0386591	0.0147234	0.0117924	0.00607282	0.0493623	0.00462039	0.00257284	0.00532481	0.0031141	0.245851	0.0132179	0.0899849	0.0149976	0.0278657	0.0116268	0.0400003	0.0193513	0.0690634	0.0267132
ABCA17P	0.0840848	0	0.0441565	0.0936511	0.0666896	0.0192475	0.0484504	0.00373461	0	0.167485	0.00373331	0.117333	0.0726997	0.0113778	0.00536224	0.0128216	0.0394467	0	0.0198672	0.0603718	0.326878	0.109276	0.429568	0.0944608	0.109721	0.47263	0.392078	0.182323	0.229054	0.29838	0.115086	0.0189538	0.119425	0.474584	0.0846644	0	0.0915169	0.0661453
ABCA2	31.2504	0	7.99907	3.8351	3.56965	0	0	13.7278	7.1214	0	8.15791	10.5636	11.0517	15.8789	4.38291	5.78229	6.07919	0	0	10.3533	0	7.58174	8.12284	5.96175	4.01634	7.17833	10.5208	3.37952	3.3802	8.27712	7.84775	20.6077	7.54185	10.1517	26.3024	22.1402	6.54003	12.0379
ABCA3	26.8109	7.57734	15.4998	23.0608	16.1779	5.5796	26.341	28.1896	7.64053	30.5471	13.4592	38.7748	29.7499	24.1503	28.2111	7.43421	7.66734	15.5	8.57573	15.2419	27.8237	22.1736	54.3431	16.036	18.9999	66.8069	57.4309	43.9927	17.9707	38.333	13.6408	10.5864	10.8229	23.6716	12.291	29.1767	8.54129	12.8079
ABCA4	2.14592	1.29431	1.65008	6.65706	1.09534	0.466306	17.5126	20.006	0.134119	5.65387	0.836161	0.101321	2.72875	0.704523	2.01854	0.616108	1.40671	1.6557	0.847732	0.487574	1.64205	3.59101	0.117833	7.64823	1.59243	0.571935	0.262915	3.32046	1.12297	5.22324	1.8962	0.894704	1.89761	1.02047	0.487042	0.471037	0.470882	1.33934
ABCA5	4.93571	11.127	3.08779	2.84371	4.0574	5.61829	2.65937	3.01755	9.17792	8.25477	6.9427	5.83718	11.2069	8.66232	6.44324	4.16289	6.83513	7.57844	12.2626	4.08941	1.03744	3.0895	4.4088	2.00309	0.692422	1.54232	2.19237	0.3429	2.26816	0.982565	2.93113	2.23729	3.20558	2.93593	11.7018	0.865797	4.82362	4.13945
ABCA6	1.63335	45.4725	9.68163	2.76241	6.51787	3.57766	5.25737	4.79973	35.262	15.5636	4.24759	4.06861	16.9291	15.6522	17.781	8.44019	25.4229	16.582	39.2125	11.7818	2.04472	8.50808	10.2025	11.4059	2.69742	0.522867	0.777068	0.252209	2.27559	3.50514	7.51336	3.92561	19.4762	9.83392	12.9098	1.98138	10.6142	16.5116
ABCA7	1.58069	1.35817	4.46405	2.73643	2.49476	2.48228	2.03421	13.0267	3.86956	6.42408	1.8334	2.02445	5.58624	4.17623	3.68366	2.12858	2.07797	3.17008	1.44406	2.28194	0.885761	2.02862	1.67223	1.63203	1.69159	2.41987	2.38894	1.71567	0.940922	1.38604	1.49482	3.46102	3.16172	5.65203	3.99527	10.3607	2.54648	2.81096
ABCA8	0.74244	21.5121	2.43824	0.447089	1.24251	2.8595	1.92835	1.74068	16.7064	3.94778	2.15255	2.61064	5.62704	7.68862	6.65529	6.19175	13.2153	5.43582	31.4386	18.7665	1.42718	6.26314	22.2486	14.6409	1.22867	0.14549	0.580082	0.228266	0.32238	8.31942	4.87034	1.66763	14.787	8.40087	6.30523	1.07771	5.28022	11.6981
ABCA9	0.859078	26.6083	5.99349	1.44506	3.16931	2.14044	2.73181	0.854733	23.3637	11.5112	2.16405	2.15574	12.465	9.78576	5.89525	4.34193	20.0838	7.50619	28.6263	9.26834	1.03793	5.099	4.52358	4.12166	1.1209	0.165463	0.448622	0.085147	1.1086	1.36279	5.0823	3.13617	14.2123	8.44846	9.57902	1.20675	6.22217	10.3436
ABCB1	1.1579	10.8359	3.41682	0.739916	6.16815	2.06663	1.25058	9.41889	4.02491	2.91536	2.11133	0.738356	4.42533	6.39077	2.45352	2.14975	5.36773	2.79393	11.837	14.4192	3.61116	13.3277	2.24642	4.5248	2.27382	0.921634	1.33538	0.891135	1.65348	2.40068	1.31119	1.5784	3.58678	3.14972	2.37157	1.74809	2.81827	1.81929
ABCB10	8.9166	4.64986	5.47914	7.36434	9.00759	4.63245	8.06439	4.91382	4.92602	7.5124	6.48235	7.67131	6.74023	4.24412	9.10096	7.11509	4.39371	4.59371	5.19794	6.31742	5.55196	4.03446	5.1318	5.56306	10.5507	4.40267	7.28825	4.12381	5.39607	5.70208	6.09653	5.51601	6.45077	6.30748	5.61993	12.2342	4.78901	5.41918
ABCB11	0.0153482	0.317339	0.0373264	0.0689858	0.00285992	0.00420251	0	0	0	0.207278	0.0130376	0.164367	0.0323452	0.000194964	0	0.0522489	0.146364	0.00780336	0.267143	0.0472163	0.0554849	0.0938733	0.273974	0.0549211	0.00999477	0.0116441	0.0328328	0.124606	0.059464	0.0280721	0.104265	0.310415	0.150413	0.15001	0.0158471	0	0.0644571	0.0228258
ABCB4	1.4098	2.56332	2.24056	1.42498	1.68768	0.478237	1.54744	3.0756	4.13526	1.72759	1.04781	0.775108	1.24878	5.12367	1.21263	1.77439	3.36501	0.612721	1.75307	1.95208	1.33196	2.6334	1.76702	1.45554	1.67543	1.00495	1.19845	2.19555	0.826735	2.80386	3.08467	0.554119	2.25771	1.30471	1.05539	1.14678	3.04748	1.57734
ABCB5	0.145104	6.39199	0.0335846	0.0937553	1.37652	0.0735905	0.355098	0.0107103	7.30872	2.06587	0.448488	0.307053	3.03673	0.851481	1.90787	0.159166	3.814	0.916332	7.62235	1.33657	0.101826	0.28221	0.0494977	0.309643	0.0983556	0.0209456	0.078403	0.0386586	0.0118041	0.117537	0.565745	0.377652	0.95386	1.34138	1.78229	0.427066	1.13826	0.541841
ABCB6	18.693	3.0441	3.19885	2.9116	2.70783	1.88822	9.65278	2.72313	2.19919	4.08621	2.85437	5.18228	2.83614	3.00786	2.09335	2.68834	3.7772	3.34828	4.16687	6.97627	4.56897	4.54555	5.98354	6.57758	20.8904	4.07442	13.4587	7.93247	4.3783	5.79038	5.37137	15.5333	6.57074	6.77402	16.1281	9.97441	3.29692	3.84455
ABCB7	25.4534	18.5263	15.1017	14.1571	31.6262	12.1787	16.8135	10.2707	17.9203	18.1224	17.6497	23.5568	12.8698	12.0385	31.4021	17.0624	14.717	16.2289	20.7296	25.5218	21.2211	22.8907	32.7141	21.5861	27.355	31.8758	24.2725	37.4881	23.4177	23.1388	18.4478	15.5028	16.2434	10.5276	17.8595	7.47575	15.9177	17.0267
ABCB8	2.20837	1.03764	1.6851	1.42337	1.87658	1.59499	2.27312	3.07905	1.15465	2.18517	0.555371	1.3708	1.60601	1.02113	1.69596	0.712044	0.975072	1.19014	0.562823	1.0052	1.11092	1.37317	0.864946	0.868686	1.44834	1.26664	2.68864	1.46322	1.05181	1.96332	1.03351	2.64968	1.69791	1.50769	2.03713	4.33327	1.24094	0.780898
ABCB9	11.501	1.3988	0.253248	1.4513	4.39593	1.63579	3.05484	8.17719	1.21544	2.9536	0.33108	1.552	4.15217	0.671925	1.20076	0.978963	0.590728	0.24819	0.840105	1.46057	2.26155	1.07006	1.27588	0.913223	4.05365	2.55216	3.70506	1.97326	1.12542	3.94552	0.869156	1.40727	0.722766	0.841868	1.86633	4.65579	1.48097	0.981057
ABCC1	8.36219	7.95287	8.59641	10.0946	8.23875	16.2716	22.6039	12.6819	9.23889	13.8972	7.67886	6.45558	10.9593	14.7323	4.05576	8.40622	10.2694	8.94635	9.66127	14.3732	9.42736	7.82052	6.27356	7.50033	6.65842	17.4911	5.27334	6.74333	12.6821	12.6045	12.3343	12.3791	9.73687	17.0577	9.76145	10.6392	9.24383	8.4489
ABCC10	3.05852	3.37003	2.84989	3.57718	1.17517	4.74943	3.55221	6.63807	2.15946	3.61147	2.35136	2.01796	4.09089	3.8146	1.5331	2.34283	2.15702	2.68649	2.1023	3.22295	1.87514	2.81376	1.05832	2.14792	1.26657	1.46209	1.8075	0.818817	1.46813	1.5128	2.42838	3.53616	2.84112	5.0971	3.85342	5.60574	3.07984	2.16063
ABCC11	1.14677	12.5167	7.27329	10.4806	8.27673	0.450664	17.5136	61.0461	0.0991458	1.10908	4.37	51.1692	24.3448	0.611166	2.48666	29.2638	7.51016	12.9081	4.14192	1.92159	7.03409	4.01754	1.06899	5.72724	75.8	11.5753	140.037	18.5236	1.26869	11.063	9.74189	0.093204	11.1438	0.378348	6.66533	4.89495	26.9503	15.2379
ABCC12	0	1.69866	0.296803	0.328503	0.252878	0.0193703	0.688343	11.2527	0.0040614	0.116162	0.123168	4.23502	2.44168	0.0122255	0.0777677	2.97396	0.539591	0.769909	0.46368	0.0644837	0.0440597	0.0901949	0.000346508	0.122011	3.70619	0.0557747	2.4757	0.227849	0.0814541	0.26543	0.576572	0	0.116304	0.0672805	0.175316	0.00619374	1.39635	0.302443
ABCC13	4.11254	0	0.735257	5.34675	0.0406219	0.028974	0.119392	3.26116	0	0	0.0227914	0.0250609	1.7523	0.133726	0.00807107	0	0.0670353	1.48603	0.0481376	0.0479758	3.1941	0.31218	0.0368138	12.3913	0.356126	0.0323987	0.0119095	0	0.0112166	0.360608	0.277066	91.8073	0.18674	0.0664527	0.0135804	0	0.0177824	1.95389
ABCC2	0.282313	1.89072	0.383136	0.911394	0.798473	0.967789	29.0333	0.566692	1.62566	1.40791	2.15308	1.05201	1.02776	1.45806	0.150383	1.38419	1.49493	1.35539	1.41441	0.589714	0.537819	0.631219	0.42302	0.252936	0.931917	0.378573	0.398003	2.88062	0.490417	0.503053	0.62612	0.957078	0.69382	1.63211	0.949792	0.221917	0.888186	0.753949
ABCC3	10.1776	3.25556	10.0139	5.29447	3.40243	8.0736	4.15115	5.36858	7.70083	11.3202	3.27325	4.26302	6.95535	5.27621	5.20448	7.11136	10.0081	8.50838	5.97235	12.2976	2.27615	11.409	2.96254	4.23874	3.71384	6.45087	1.67034	50.772	5.33229	2.93136	10.5017	3.10961	7.42286	10.3783	9.24147	5.09804	3.80008	4.425
ABCC4	1.51664	3.66647	1.8547	1.46121	2.75738	2.36326	2.1838	2.2725	5.84184	2.35727	1.64778	0.563856	1.85023	4.87057	0.964058	13.7708	4.32908	2.12281	2.65358	2.76123	1.0536	3.11787	1.53725	1.79107	1.27316	0.663382	3.99909	1.09594	0.947469	2.13036	3.42294	1.2787	2.02781	2.17378	2.51366	2.14257	2.87372	1.82482
ABCC5	54.7549	13.5352	8.08177	24.3863	13.1233	12.5246	37.7189	39.4754	15.1607	19.2737	15.5409	2.76623	34.565	27.3893	14.2149	16.7349	10.8939	8.96542	7.23574	13.5213	14.7842	8.57373	4.04826	11.5079	17.1708	13.8779	4.47495	1.58287	6.53565	20.5978	8.84589	32.2189	9.3306	9.19775	34.8927	21.3965	6.20674	13.9224
ABCC6	5.06366	3.7592	0.957646	0.705833	2.44459	0.63892	3.39618	3.69118	4.23131	0.476972	2.63771	0.44395	2.68762	2.54303	0.547097	7.19902	2.47295	2.41784	2.47282	6.70913	1.36744	4.00885	7.32207	2.56171	1.9864	2.39173	0.140685	1.97907	0.702237	1.23073	4.02457	5.02949	6.96633	2.04055	8.77116	2.01627	4.31262	0.673825
ABCC6P1	2.37011	2.44755	0.0445955	0.241089	0.65071	0.699127	1.75279	2.3683	4.81557	0.138306	1.89557	0.23168	1.9845	2.68593	0.505823	4.6451	2.00758	0.826441	0.525513	3.27225	0.58607	1.8168	3.93239	1.51639	0.79907	1.35354	0.0546421	0.662691	0.277163	0.714371	2.76173	3.52431	4.1367	1.07126	5.06553	1.19607	3.19601	0.309612
ABCC6P2	0.418514	0.816806	0.0378974	0	0.931597	0	0.222864	0	0	0.0410428	0.0946048	0.0238912	0.143669	0.157025	0	0.840536	0.30871	0	0.11502	0.956523	0.485547	0.224502	1.30253	0.36294	0.308084	1.15794	0.0169582	1.23854	0.157056	0.437446	1.0549	0.21744	0.397329	0.262049	0.826751	0	0.301581	0.0188681
ABCC8	0.203324	3.13531	8.3504	2.42676	0.873636	0.225467	3.49911	1.13169	0.552839	11.3512	9.6543	14.4907	5.91871	5.96117	10.6267	1.39506	1.78147	7.89202	1.43246	0.450587	1.16346	9.05564	0.164304	0.883289	0.89843	20.9594	10.9685	7.65672	22.2058	0.224005	6.38134	0.710214	9.6716	0.565183	0.685125	16.3465	0.876886	6.02705
ABCC9	4.61799	38.8524	5.46516	5.90513	6.01468	4.70722	5.30234	2.75031	14.4983	12.2151	6.91373	3.28854	12.6815	10.6198	20.3762	14.4146	22.8026	5.75029	25.1357	23.0768	6.74929	15.871	25.9684	26.6197	8.39016	3.48424	3.75155	1.37249	2.47108	14.5784	14.2104	5.33312	13.1371	11.9603	8.14437	2.34579	8.25312	7.35475
ABCD1	9.25776	3.12406	2.3066	2.7696	3.66505	4.89166	7.76798	8.18177	5.63312	3.78244	2.12361	2.20141	4.77425	4.28803	0.498632	2.35691	2.2949	0.809919	2.38323	5.80597	3.7131	2.64085	2.39492	4.53927	2.95925	3.75127	4.37092	2.02168	3.20129	4.28453	2.71753	6.21505	3.11947	5.85279	2.13573	4.57154	2.34327	2.19376
ABCD2	0.0751476	3.16835	0.686162	0.239017	0.97754	0.146063	0.0617474	0.221045	0.624377	0.554278	0.191662	0.203735	0.425972	1.69328	0	0.575321	0.790075	0.633071	2.12989	4.09996	0.182249	0.234836	2.61164	3.1205	0.374896	0.0414644	0.103778	0.062916	0.0800764	0.149906	0.339476	0.494298	1.55253	0.542042	0.474923	0	0.56064	0.147457
ABCD3	136.301	43.4935	63.1942	51.5758	154.906	33.632	66.9565	62.4777	36.0346	49.3175	32.1655	40.7237	81.9583	58.0735	67.6957	36.9089	39.2385	74.2074	38.6711	37.2992	141.127	77.9388	138.017	87.0366	79.4348	159.79	74.3929	155.733	99.0801	108.487	70.1465	64.0109	77.7161	37.5208	28.592	35.8465	37.1795	88.693
ABCD4	2.58105	8.16693	5.14354	4.9034	8.50494	4.57135	5.99991	7.43726	5.49199	4.91092	4.03561	4.0784	4.98358	6.72009	2.13393	4.59459	6.37031	5.26839	6.3537	12.2378	4.55981	8.58327	6.02184	7.04242	3.85932	6.74536	5.23479	5.25664	6.72643	6.04601	5.65003	7.54094	8.90881	7.08083	4.83529	14.3925	4.17949	4.09781
ABCE1	13.8362	7.50832	5.22537	6.59304	10.889	9.93142	12.4887	5.04164	4.94967	4.76164	10.4141	6.49056	7.13811	7.00983	12.2756	10.8033	7.789	7.57995	11.0814	7.69667	8.88915	7.61484	13.7131	11.0534	12.085	7.24445	10.1648	10.3738	8.33826	9.22462	11.0763	11.6139	6.21202	3.53458	8.89756	0.391484	5.16095	8.61323
ABCF1	31.6498	18.5824	16.7195	23.1141	11.9592	33.3547	24.1381	25.8217	17.3759	16.3152	24.1056	23.2475	25.8522	22.9007	23.1299	25.1489	23.4152	19.0513	36.2859	27.0606	62.4375	26.2919	25.3965	33.6145	36.639	36.6149	36.1022	20.3226	30.3425	33.861	31.8865	40.212	30.3307	41.9448	37.3044	16.7074	35.5813	27.2837
ABCF2	30.2942	8.08288	11.1362	14.2546	18.2682	25.2093	16.7946	16.508	15.0318	16.7909	12.105	12.2408	14.6292	9.16221	9.40958	15.5051	15.4602	16.1397	17.297	20.0083	32.73	23.296	28.5314	33.1221	30.957	26.7593	35.5655	48.9868	33.9318	33.8125	22.2696	39.1729	23.0633	16.8339	27.6665	17.5798	17.8236	19.3104
ABCF3	42.9954	12.1204	13.0227	14.4562	17.2246	20.6787	15.4604	36.8368	13.2359	13.1996	13.6637	15.2454	12.5758	18.3974	5.73281	10.5293	10.336	15.6327	12.1979	18.8395	24.3333	21.0567	23.1671	18.4427	19.4475	20.3355	22.9978	24.1871	17.6891	19.293	13.4576	21.6596	12.9411	16.837	20.2401	22.6054	14.9919	11.5036
ABCG1	11.3574	4.17918	3.20038	9.37114	21.1466	4.9548	8.24301	7.84442	6.01673	6.7051	13.7078	11.5889	12	7.08405	1.48014	5.90508	4.54241	5.06966	4.5353	17.8625	19.1902	9.87061	16.1693	9.18005	6.74458	20.3085	5.94943	17.6985	9.27946	11.0597	8.49956	8.25617	8.62533	13.9455	7.80915	9.47825	6.57143	7.13671
ABCG2	0.279296	1.20604	0.372915	0.289843	0.776065	0.390388	0.274286	0.00704735	0.993844	0.886666	0.380307	0.440098	1.27607	0.833872	1.34082	0.850664	1.51153	0.644632	1.9902	3.28629	1.96416	6.30444	0.886154	1.68856	0.489361	0.352442	0.45603	1.31884	1.66648	0.655603	0.776239	0.393392	0.715329	0.308714	0.7039	0.0725083	0.459521	0.517823
ABCG4	0.0514085	0.0919368	0.112105	0.0768306	0.0153313	0.131796	0.112952	0	0	0	0.0217785	0.00477523	0.0335934	0.0839683	0.0124981	0.0299111	0.023012	0	0.0324474	0.10692	0.0487013	0.0292111	0.00404081	0.0216404	0.00957023	0.00935896	0.00439631	0	0.0122594	0.0225827	0.0405384	0.0110501	0.0420969	0	0.0290865	0	0.0103282	0.00381112
ABCG5	0	0.375235	0.174516	0.0547654	0	0.172302	0.0410773	0	0	0	0.227021	0.0893752	0.108918	0.588846	0	0.0732422	0.0768907	0.492486	0.662642	0.184416	0.0378062	0.0245352	0	0.0319186	0.00770615	0.00418294	0.0117832	0.00334035	0.0294637	0.0202086	0.0169321	0	0.00432073	0.0397128	0.059984	0	0.14708	0.0203664
ABCG8	0	0.0140511	0	0.0845994	0.00529798	0.10028	0	1.38669	0	0.581006	0.509548	0.0591709	0.026389	0	0	0.00685652	0.0079185	0	0.146681	0.0904777	0.0389494	0.0834368	0	0.10463	0	0.00861877	0	0.00688265	0.0705954	0.00694075	0.0418499	0.0151842	0.115668	0	0	0	0.0520606	0.0314592
ABHD1	0.484322	0.639759	0.809049	0.369608	0.177471	0.477186	0.895431	0.575399	5.69563	0.832584	0.605078	0.31932	0.433685	1.57053	0.0824172	0.411658	0.368997	1.48221	1.18707	0.920998	0.598796	0.601935	1.27872	0.86412	0.104438	0.254158	1.2263	0.967356	0.689598	0.373477	0.318337	0.4104	0.660914	1.09722	0.343577	1.89049	0.457508	0.711181
ABHD10	4.1211	4.27203	1.5876	2.87218	8.24473	3.67925	2.06115	1.10294	2.58149	1.38954	4.17721	5.49183	5.94741	1.2347	5.09341	3.84426	3.31386	2.49142	6.55327	4.14283	4.87453	3.28973	7.91084	4.80885	6.0327	6.11507	19.0148	6.37914	3.95867	7.89631	5.56371	4.84986	4.62956	2.24151	6.05941	1.1009	3.94206	6.92632
ABHD11	29.053	4.71714	6.13311	8.91671	10.1354	5.14489	28.7025	29.8598	8.82684	18.7144	3.95374	4.04301	25.3584	18.6923	7.96959	7.92488	5.13715	10.9496	7.08906	5.32575	18.9205	7.3762	8.15532	13.6044	22.1462	9.4311	6.84729	27.1914	7.16018	20.5806	6.52413	19.7143	6.37649	14.3285	18.6216	9.19406	6.02553	6.91405
ABHD11-AS1	0	0	0.127835	0	0	0	0	0.0439927	0	0	0	0.0515467	0	0	0	0	0	0	0	0	0.0608265	0	0	0	0	0.110806	0	0	0	0	0	0.0854237	0	0	0.0543955	0	0.0358292	0
ABHD12	55.2039	27.2372	24.0975	49.0803	35.3807	36.0773	220.318	46.2705	38.6272	58.6494	77.8936	95.5311	44.5682	31.8209	41.1261	32.555	33.5621	27.0045	25.79	50.146	62.603	55.5107	56.2081	29.9091	83.3219	80.7231	85.4009	90.4952	49.11	89.4492	39.451	43.3944	28.9325	33.0836	39.6759	99.9565	33.1563	33.9318
ABHD12B	0.0999929	0.547492	0.756897	0.213967	0.086774	0	0.271622	1.69901	1.99102	4.30909	0.958174	2.9377	0.236733	37.8361	2.92679	1.08327	0.165167	0.214555	0.720249	0.123102	0.0407741	0.073405	0.598584	3.12247	0.0152871	0.0992255	0.0174321	3.67395	0.00542716	0	0.656329	0.0071588	0.16775	0.545825	0.0547979	0	0.26814	0.129
ABHD13	2.68004	2.19343	1.62989	1.71675	1.92126	1.84524	1.50002	0.855682	2.6429	1.67172	2.86744	2.10089	2.88494	3.6532	4.6842	3.97394	2.71664	3.04901	1.78782	1.30552	0.913039	0.981906	1.66266	1.65328	1.25877	1.83416	1.27396	1.06104	1.16381	2.00226	1.62004	0.971901	1.30935	1.30708	1.681	1.0891	1.15059	1.58819
ABHD14A	1.81286	2.37623	1.09002	1.51761	2.23219	1.52891	2.44887	2.38387	0.597253	0.884577	1.62933	2.49195	1.67195	0.83759	3.14457	1.76692	1.83019	0.602347	1.41959	2.25459	1.58343	2.51182	1.95515	2.75986	2.62124	5.26532	8.63275	5.80609	3.40759	1.9575	1.36206	0.804667	2.74356	1.55101	0.786678	14.3863	1.50377	1.71618
ABHD14A-ACY1	2.59684	3.61766	7.76939e-15	0.00687492	1.14609	1.75814e-11	0.0633684	8.14956e-09	2.01187	1.35045	0.772329	0.591603	1.24884	0.811583	2.68024e-18	0.711039	0.586725	2.34484	0.845487	0.0201709	0.184954	0.722003	0.95462	0.471712	0.120017	0.763842	0.392036	1.12638	0.324106	0.919321	0.624313	0.412311	0.467202	1.02374	0.222056	5.65551	0.945362	3.35758e-10
ABHD14B	2.66271	2.37099	0.646779	1.24371	2.35573	0.888596	1.77237	1.19024	1.59805	0.624825	1.94265	2.11367	1.48361	0.860908	0.428876	1.8024	1.19357	1.83368	1.27138	2.51621	1.08665	2.57214	2.3032	2.26896	1.38705	2.40197	3.67743	2.96882	1.7665	1.01104	1.21412	0.63713	1.7635	1.08171	1.12496	1.63149	1.35877	1.30039
ABHD15	1.29079	0.86559	0.958806	0.794865	0.940463	0.585023	1.99809	1.48942	1.23751	1.18407	1.02073	1.19833	1.54218	2.62927	1.04205	1.22998	1.04833	0.74648	0.982029	1.27891	0.413225	0.726124	0.9164	1.743	0.700382	0.813417	1.59323	0.829982	0.399735	0.724246	0.891962	0.799533	1.43276	2.1774	0.896252	2.68483	1.16079	0.961224
ABHD16A	22.1465	4.93801	11.766	11.5354	19.2682	10.1895	9.17885	13.162	6.58882	9.43834	8.02489	12.6574	17.6664	8.65959	5.99001	12.8535	7.46343	8.52889	7.08447	12.8428	18.8204	19.0439	8.954	14.9321	12.7446	20.3935	22.6739	16.5048	17.9036	17.0876	10.7011	12.8499	10.4256	21.0195	12.0933	35.5754	13.4678	8.53795
ABHD16B	0.361689	0.531974	1.00255	1.03628	0.421641	1.13095	2.11587	2.59516	0.531699	1.51468	0.695518	1.02775	0.753497	1.19241	0.685928	0.603802	0.698348	0.878656	0.57184	0.691774	0.358728	0.899159	0.403707	0.358774	0.719174	0.638003	0.552625	0.461193	0.519813	0.216886	0.480308	1.0537	0.541775	1.98258	0.610568	1.55306	0.8108	0.59961
ABHD2	8.47473	3.67104	4.54144	4.71194	11.9456	3.53154	4.71434	5.9433	4.44891	3.28827	5.85363	16.7847	3.1009	6.5217	19.7172	2.67716	4.48843	1.98049	3.31461	4.94228	6.4809	4.03463	5.78375	5.49761	4.12236	6.32324	10.3733	12.1771	8.48384	4.04897	3.77437	5.78394	5.79337	8.84189	3.19338	7.54608	3.501	5.79263
ABHD3	2.91863	3.44155	3.41154	7.02324	14.8126	3.7354	3.38983	4.78611	3.68764	6.23006	3.22985	5.0384	4.35504	3.2378	9.99717	3.91653	3.22611	2.27278	2.72271	2.62075	2.24312	2.17202	4.08455	4.39517	13.0784	16.2307	13.9825	13.3923	3.4267	2.1052	2.82819	2.6341	5.98607	1.66233	5.04151	8.59288	3.00774	3.34666
ABHD4	8.20065	2.74858	3.39221	4.43472	3.87889	4.17665	2.89901	6.12045	2.58996	3.8973	3.31704	3.39979	3.89071	1.44008	5.10759	2.11959	3.72313	3.26389	2.41356	4.22624	4.48129	4.72994	3.28797	3.10393	3.48881	6.23101	3.52269	6.20969	3.89666	7.19017	4.49918	4.06988	2.79721	3.23648	3.89894	2.88118	3.98006	3.13562
ABHD5	5.57073	5.76467	1.55172	2.38807	5.34873	1.95797	4.02148	1.36095	1.85709	2.05298	3.12616	1.8135	3.30727	2.8304	4.24259	2.94961	2.35328	4.5185	3.95079	5.35269	2.28556	3.75344	5.03337	8.01339	4.0363	5.14929	3.57713	6.3439	5.75887	4.00066	4.1553	3.73551	3.54017	2.09649	1.06744	3.05327	2.77841	2.92966
ABHD6	0.537147	0.685204	0.565648	0.569194	0.988045	0.734826	1.44479	1.3725	0.666971	0.392195	0.517583	0.412881	0.628469	0.65158	0.768329	0.760916	0.754746	0.503814	1.48005	2.89692	0.560752	0.759082	1.19935	1.28933	1.25499	1.21968	1.1108	1.43779	0.913604	1.39226	1.00117	0.387072	0.782882	1.0079	0.671676	2.36864	0.49859	0.440841
ABHD8	1.39316	0.66454	0.852617	1.60885	2.28431	2.1774	1.59498	1.8396	0.98774	1.22369	1.01037	0.898906	1.52914	1.57404	0.454454	0.657355	0.780309	1.14444	0.661233	1.46923	0.857348	1.42252	1.35243	1.22973	1.22783	2.64205	2.05267	2.3651	1.44903	1.27112	1.12153	0.712405	0.719601	1.80378	0.827509	3.39671	0.80281	0.597876
ABI1	21.2368	16.9855	15.9242	13.8738	21.5961	19.5099	19.2083	15.5988	19.6779	15.9845	22.5941	13.5139	18.2577	24.5476	26.9004	21.5974	23.1708	17.7629	23.8747	19.73	23.6125	18.569	22.4677	24.7141	32.2037	28.7442	22.4353	27.6115	22.8768	26.5727	19.0125	19.1257	17.7445	18.3406	16.5389	16.2287	17.535	19.1727
ABI2	2.48063	2.50922	2.67848	1.66949	1.23832	2.74365	3.10419	3.64481	2.50664	3.33795	3.403	2.37797	2.26744	2.60785	3.25376	2.37626	2.58522	3.616	3.16525	2.13425	1.75363	3.2594	1.92349	2.0998	2.85279	3.72122	3.90135	3.30634	2.48424	2.30884	2.56717	3.0811	2.79167	2.08774	4.51106	6.10999	2.23669	3.22139
ABI3	1.2294	0.919549	2.02878	1.42124	1.24359	1.20679	2.22059	2.99205	1.90515	0.983305	1.06308	0.422552	1.11929	1.97325	0.144009	1.21402	0.813406	0.830207	0.622086	3.55011	1.43039	1.0336	0.872097	0.852402	1.86194	0.688987	2.08328	2.22326	1.02686	1.36599	0.972623	1.80522	1.07213	2.72162	0.856795	3.87413	1.34799	1.00258
ABI3BP	2.90799	65.435	8.13967	5.95375	12.6428	6.01484	6.66741	4.80868	71.5733	18.3486	14.8006	6.20111	14.3648	23.1586	37.9922	24.5563	73.4029	14.5498	53.5885	20.1213	4.223	21.5249	24.3798	22.6587	20.6231	5.40188	4.96024	3.06176	2.56744	28.0851	17.3273	6.9422	30.7935	18.6081	25.4701	1.8132	21.1618	16.1089
ABL1	12.7472	16.0997	8.57516	8.33601	4.00263	15.418	12.6155	14.4626	14.0277	9.2089	8.50475	7.80202	9.41497	21.9387	7.75907	10.8075	13.9499	10.1111	15.2428	13.3734	9.05477	16.3038	10.8725	9.95073	7.18266	7.00497	6.90141	4.61787	6.78266	8.69325	12.3332	9.02958	18.4885	23.3952	13.3826	11.7906	12.251	10.9886
ABL2	9.12018	13.1522	7.17116	8.22459	6.43197	19.5585	10.6094	7.80451	12.9973	11.4361	15.9461	9.62341	10.003	16.3379	12.5856	13.0087	19.8157	11.5827	14.5283	11.3099	6.35195	17.3776	17.6307	10.1516	5.92911	5.12607	7.54585	3.42055	8.48247	6.16796	11.7339	9.56358	15.0279	14.6107	13.8263	2.08108	9.71868	7.64558
ABLIM1	1.95744	11.7373	4.22228	3.82618	7.13824	5.39962	9.29453	2.76986	7.15683	4.84962	8.3318	6.77059	6.63191	7.51301	6.85954	11.4007	7.89633	10.1229	18.026	21.0474	9.42947	10.2371	16.9441	7.70068	2.62261	4.78605	6.84868	6.08461	13.4088	11.3654	7.99946	3.18592	10.6198	6.99064	4.98347	1.57324	5.29526	7.94866
ABLIM2	0.363998	0.770257	1.40214	0.32846	0.332989	0.635844	0.411309	0.697755	0.749651	1.14241	0.536473	0.182666	0.801433	0.698488	0.680785	0.403989	0.71695	0.750298	1.89051	2.49474	0.674504	2.1333	2.74214	0.853799	0.973125	0.68964	0.348869	1.71587	0.689311	2.09502	0.958728	0.228644	1.08165	1.41001	1.22547	0.379831	0.504275	0.89437
ABLIM3	1.51932	8.88503	5.12364	2.50326	2.87246	2.60023	1.48774	2.39672	2.14479	7.68782	3.28877	10.6903	7.65982	7.34267	4.94218	3.18781	6.71362	10.5579	17.0726	14.3104	5.75793	12.0751	10.4687	7.70548	0.822924	10.6851	21.8385	12.8784	2.16042	3.14906	4.61557	1.46551	11.6063	4.9784	3.78159	5.5803	4.64055	4.42039
ABO	0.0505496	0.802672	0.104935	0.310342	0.0188799	0.703775	0.616184	22.5673	0	0.92557	1.01305	0.138978	1.33129	0.486371	3.26494	0.228911	1.11539	0.0124699	1.55907	2.44479	0.900702	0.484693	0.597326	0.13826	0.330452	0.0919707	0.0700392	0.00611989	2.70578	0.13627	0.951979	0.279429	3.02372	1.41294	1.27954	0	2.591	0.451622
ABP1	0.235588	0.139592	0.141614	0.186814	0.199206	0.144717	0.062199	1.62852	0.452708	0.0657393	0.185319	0.0145189	2.73752	0.374325	0.00945823	0.0454092	0.253543	0.00787558	0.218248	0.126739	0.0782984	0.0447712	0.0154911	2.80615	0.330789	0.0667033	0.0201261	0.00760947	3.51299	0.0998076	0.304202	2.47126	0.0693321	0.0369118	0.0761638	0.00676185	0.182805	0.0926037
ABR	11.5874	10.7185	8.12088	7.52678	7.50411	9.57589	6.84102	10.9188	11.7755	11.5549	10.4161	5.11539	9.98006	13.8058	5.90969	9.15524	12.0002	7.76086	13.8004	21.6753	9.00132	12.6992	7.28861	13.1233	9.25603	12.7711	15.4738	6.55938	8.0571	10.0286	11.9443	8.86329	11.5637	17.5747	10.9759	11.5687	7.9481	11.1727
ABRA	0	0.393579	0	0.0136177	0	0.0819639	0.122575	0	0.132248	0	0.0482478	0.14604	0.101962	0.199144	0	0.0860946	0.0994202	0	0.117033	0.119361	0	0.0170803	0.0162073	0.0144294	0	0	0.00585956	0	0	2.13374	0.0134728	0.018335	0	0.00359096	0.0666825	0	0.00914329	0.0506426
ABT1	2.11916	0.919542	0.366223	1.09938	2.61868	2.66055	1.95154	3.16789	0.391923	0.442672	0.970433	1.8472	1.86747	1.69896	1.26329	1.01156	0.942603	0.729538	1.66967	2.53846	4.47081	2.36381	1.80081	2.76849	3.06271	2.6639	2.59561	3.00197	2.40355	3.13368	1.08358	2.04124	1.59726	2.65593	2.11654	0.182018	2.45422	1.74063
ABTB1	3.63186	7.31575	5.15936	3.95262	4.61926	5.3566	3.57059	7.61552	2.7779	4.1506	4.30628	6.07833	5.30563	4.20336	4.86921	3.47512	3.92097	4.0561	5.0666	8.68081	3.53439	6.92177	3.7472	4.89365	2.46886	4.42675	4.31848	3.74955	3.6604	3.95017	3.56505	3.65606	5.5202	10.4454	7.12667	13.309	4.0005	3.87478
ABTB2	0.910838	0.319962	0.372325	0.417681	0.367257	4.74392	1.18719	3.17254	0.407196	0.561647	0.428169	0.135599	0.573562	1.45802	0.26448	0.399484	0.381186	0.113916	0.844	0.634365	0.282928	0.885354	0.629648	0.524883	0.527828	0.19258	0.193257	0.0633273	2.14488	0.886627	0.724945	0.50548	0.557173	2.06745	1.0718	0.333356	0.398931	0.327621
ACAA1	22.5611	11.9139	12.94	10.0729	23.8904	11.5081	17.6002	15.772	12.4776	9.62688	10.6101	15.0664	13.6008	13.7984	6.23531	7.40786	10.3209	8.21017	11.1722	23.4285	14.9843	24.1544	14.7161	17.7962	11.6681	22.7631	29.9734	48.8592	25.3671	27.304	14.4313	15.6454	17.6628	14.1321	11.992	29.3939	14.6634	11.9837
ACAA2	10.8438	13.5594	8.6397	10.0705	9.11995	11.9964	6.55473	6.96135	7.09006	7.44356	11.4651	4.05231	11.1148	11.3704	10.1012	7.14666	12.8071	7.14756	13.5078	25.6227	8.95396	12.3686	35.5588	34.8609	44.9577	26.2127	8.3944	16.8166	3.65788	15.0569	13.3357	8.0492	12.4053	12.1475	5.64346	1.07449	7.21075	8.38403
ACACA	38.2343	18.0529	12.1891	30.0628	28.798	13.5505	86.2803	26.6295	23.0441	18.8644	20.2278	20.9279	38.6188	20.5764	11.7617	35.0471	17.7663	20.5201	18.2675	20.4297	23.5964	14.644	36.8069	20.7012	59.7056	37.4881	45.5916	59.6035	30.7446	26.8479	18.3751	28.1096	25.6662	19.0316	29.4555	27.8316	10.1422	16.992
ACACB	11.4778	61.5389	4.6323	6.85995	2.14085	4.30046	4.76647	9.12895	11.5196	11.9293	18.6234	7.32621	29.0983	18.5371	7.79273	12.6507	11.1599	18.92	66.4386	34.9207	3.55981	15.0589	24.4514	44.1939	1.77496	1.80454	2.68958	0.457775	2.41348	4.74467	7.12126	6.2132	34.7796	29.7596	9.65267	2.92247	9.03135	7.24145
ACAD10	5.57812	5.07174	5.94945	7.18474	4.29004	4.17108	16.4762	3.74578	6.92172	6.90239	5.82397	7.05755	5.83849	7.25912	7.40596	5.38558	4.02961	7.85056	6.16831	4.73362	4.63289	5.0954	5.34837	2.90261	4.95855	4.32934	5.01981	3.81849	9.16808	8.19427	7.11682	8.9441	7.04536	7.77729	6.9033	16.3166	6.0067	4.20809
ACAD11	2.42419	11.2234	5.04858	4.96626	3.26425	6.33386	2.63327	1.62424	11.6051	5.78592	6.36518	2.91921	5.83042	2.51045	2.05533	5.40495	7.98603	8.10004	9.5979	5.21167	2.0255	4.82469	5.97097	3.32548	2.18343	2.0693	2.27569	2.47799	3.34535	1.4417	4.59332	4.53286	3.99242	2.64647	8.15092	0.0585512	4.5292	3.44745
ACAD8	16.2923	7.38879	5.85726	4.8764	8.84808	6.0198	4.1837	8.20787	2.72665	4.34959	4.81511	4.4917	7.16117	5.53782	1.34296	3.87409	5.59364	3.20618	5.16027	11.5283	4.84784	8.77992	11.7039	9.12715	5.50163	7.43164	6.81246	5.14718	20.8774	8.77718	7.03613	10.6184	8.02977	7.5286	4.84064	6.07247	7.86245	3.43848
ACAD9	51.2372	35.8073	18.869	31.9234	46.158	57.1464	27.8938	65.8701	28.7283	29.7117	40.8753	31.3777	36.5947	32.7045	27.8361	32.2306	25.6073	31.7542	31.6331	40.6038	50.6347	36.8543	62.8615	33.6981	35.4008	32.664	33.5323	37.3636	35.6197	32.9818	34.7571	53.6087	43.3712	42.676	45.2991	29.7313	32.511	28.3945
ACADL	0.0916998	6.11552	0.294157	0.204594	0.176733	0.911705	0.370969	0	3.23312	0.0240043	0.135306	0.11307	0.382782	1.05454	0.221049	0.35367	1.53199	1.77926	3.34471	6.26353	0.342867	0.865661	7.60125	3.56694	1.08806	0.0231821	0.0195863	0.0111074	0.0364624	0.507965	0.835926	0.0367043	2.50912	1.2659	0.663523	0.00658549	0.813635	4.90214
ACADM	40.3753	38.7296	22.7008	11.4062	45.7388	20.1022	38.4523	19.7041	22.5273	25.3885	19.2316	31.7363	20.7778	32.303	57.6398	28.2027	28.8378	23.5841	42.0914	36.6438	21.7655	32.3385	54.7452	46.9303	25.265	38.1365	46.8739	83.2044	41.6086	45.5367	39.1858	34.235	38.7567	17.1896	33.4659	22.9023	23.8285	40.9559
ACADS	6.52267	7.76853	1.19048	1.48548	16.825	1.41388	6.22719	11.3609	3.89761	2.84301	3.89972	3.33301	4.53721	5.68317	3.53671	4.53388	3.48344	4.47289	4.03775	16.8163	9.26742	3.96152	11.7066	11.8989	6.10633	14.1958	4.32287	11.72	7.89748	9.15471	3.68445	3.19112	3.85244	6.15806	2.48629	0.425168	2.60255	2.51325
ACADSB	13.1833	7.17793	4.24281	9.77575	9.92524	1.49425	11.8993	3.33335	1.58153	9.56387	16.411	18.4413	31.8826	8.59299	10.6695	20.7785	6.11936	5.58105	8.23021	7.08487	11.3575	26.6379	9.30011	9.61202	17.8967	29.8276	17.3426	54.0885	12.0381	14.089	9.90172	49.9757	10.2915	6.13124	24.0978	4.17157	2.1919	11.3934
ACADVL	129.247	121.327	93.5495	95.647	71.612	102.698	97.3006	105.398	126.249	162.202	102.186	46.7535	94.4796	112.592	54.2174	68.9902	91.6705	155.16	114.434	167.723	115.247	168.529	150.608	110.092	104.679	97.241	117.022	76.4311	108.039	97.4725	128.755	142.522	154.829	293.184	102.014	256.2	76.6326	81.6637
ACAN	8.08067	14.2008	1.22566	2.46271	1.04182	180.262	0.725051	5.38535	9.28962	1.4629	2.52894	0.430702	2.28108	3.46711	3.67175	2.17342	6.4701	0.69153	1.28952	2.83401	3.17218	3.68247	1.51299	1.56857	3.30325	0.664066	0.264909	0.249428	1.18236	8.30536	2.59981	2.24673	2.41041	2.97334	2.21519	0.0482831	1.20675	1.05395
ACAP1	1.23341	3.12437	4.7438	3.62448	5.29476	2.11388	1.8333	4.87421	6.03148	5.04242	2.70463	0.701285	2.03302	6.55737	1.947	4.0143	3.69092	2.9532	2.34656	3.26524	0.824066	1.22891	1.19316	1.47125	3.58375	0.414046	0.894008	0.404116	1.73661	0.789371	2.04595	4.92843	2.7225	6.51136	3.49774	2.20263	4.98096	1.46503
ACAP2	10.2177	10.7228	7.18477	7.86445	15.0543	13.2632	8.01198	16.9183	11.5354	9.8353	10.653	10.6254	9.17002	19.6504	17.2211	11.3829	13.8389	10.1476	13.8768	12.1128	9.63839	9.57528	15.7653	13.808	8.30972	10.7681	10.1842	13.175	9.00927	9.08052	12.0514	8.56143	10.5628	8.87714	13.5287	5.33736	10.1468	10.7704
ACAP3	6.1567	5.95649	6.12909	4.29796	1.94357	7.03457	11.7904	21.814	6.20716	9.51021	2.37681	4.26851	8.13792	11.0444	3.95075	3.10297	4.57375	12.9196	3.88793	4.33375	4.1476	5.3189	3.45629	2.35867	2.52081	2.61234	4.31818	1.36133	1.51203	2.40743	5.23359	4.29528	6.02106	12.6108	5.27291	8.62149	4.6312	5.07028
ACAT1	13.8399	29.0912	14.9119	18.9224	29.4893	8.34164	39.0892	11.2263	21.7444	18.5647	57.9824	26.5778	12.8571	17.0435	20.7075	20.8568	19.8779	15.509	38.7224	35.3044	24.8921	25.5689	58.5587	41.782	19.837	42.5191	38.1464	20.794	39.3892	64.9694	43.1635	11.0802	24.3115	14.4091	17.6803	16.0407	29.2673	25.9701
ACAT2	6.13015	2.32875	2.29306	6.10037	3.37195	1.07661	4.27249	4.55115	1.57357	2.765	2.37876	4.25285	2.6682	2.83517	4.56592	3.2317	3.54112	1.27145	3.80956	5.12723	7.13473	4.12943	10.4229	4.27077	5.95516	5.19328	6.95668	7.15703	5.65622	7.16286	4.87779	2.05577	3.18679	1.9123	1.88261	1.12115	2.40527	3.46877
ACBD3	25.8946	13.3239	13.1534	16.6941	22.1147	32.5679	15.0625	28.5465	13.565	23.3819	19.2252	24.7826	20.2375	15.6879	23.7426	24.9637	16.7401	13.6479	18.1759	22.6222	40.2096	23.2858	45.5216	31.8324	25.897	21.4686	39.6985	26.1557	36.4021	29.7817	26.0475	25.1804	25.6792	32.0496	28.8259	45.1535	25.2963	24.7464
ACBD4	5.52377	7.27481	5.29132	4.21281	3.01621	4.50836	7.42677	5.38267	7.69873	9.99665	6.70432	7.18331	7.3543	12.5423	4.02573	2.22786	3.70157	8.9361	5.58392	7.14841	4.64355	5.9604	7.945	3.94093	2.45757	10.094	8.40204	7.40033	9.46896	5.39564	5.92773	4.96071	7.21366	9.89716	7.16849	11.7684	4.17241	3.67091
ACBD5	36.5538	18.7678	21.9099	18.7617	31.1685	18.3896	34.7588	43.0084	29.5297	26.527	22.1086	34.7075	34.9192	24.9747	64.2887	34.7034	21.8537	21.2469	22.1477	23.0168	29.3319	16.926	35.3593	23.7288	36.9166	27.5669	22.9864	54.1997	15.5729	23.0122	21.8612	15.4226	18.8273	17.8477	21.8168	12.0816	14.4431	31.5922
ACBD6	37.7687	28.8431	28.034	41.9085	51.8277	31.2852	27.4835	60.3915	36.4155	32.147	57.3145	41.9254	34.1658	27.5326	68.4264	52.1594	33.3504	54.164	47.7364	38.7605	42.3984	39.5538	43.6988	28.4757	40.6105	35.3002	45.7891	35.8721	57.0503	40.492	50.6883	48.177	38.2685	28.7974	35.9777	30.743	39.5403	55.1037
ACBD7	0.239632	0.0603835	0.0414907	0.239495	0.053605	0.120607	0.176508	0.317262	0.00210206	0.24475	0.0655467	0.0898406	0.336511	0.0397174	0.000550103	0.107156	0.129864	0.0326101	0.0464998	0.0774641	0.355676	0.17094	0.463201	0.425988	0.0308896	0.107386	0.261257	0.0348385	0.0559984	0.108374	0.0694474	0.310209	0.0504521	0.0184133	0.0644021	0.703326	0.180796	0.314418
ACCN1	1.62779	0.0313044	0	0.0906617	0	0.00818371	0.240804	0.0059186	0.146073	0.04616	0.0420606	0.0993824	0.149873	0	0.00656782	0.103699	0.121638	1.26029	0.0243664	0.140331	0.136872	0.267255	1.67978	0.330583	0.0792223	0.0170656	0.0924907	0.195001	0.0136768	0.00650489	0.128788	0.328772	0.156613	1.57463	0.249323	0	0.0576169	0.0907006
ACCN2	1.54158	0.387747	0	0.410442	0.318901	0.601322	0.102885	0.0623117	0.806888	0.222542	0.690173	0.236909	0.347993	0.700132	0.238554	0.366224	0.493946	0.000329589	0.168043	0.349524	0.83558	0.429861	0.484709	0.441618	0.373408	0.223113	0.153032	0.116408	1.07542	0.411471	0.235973	0.176609	0.271906	0.139418	2.13392	0.888432	0.433602	0.178186
ACCN3	0.187094	1.11139	1.42227	1.36585	0.180211	2.20079	4.52396	1.3706	4.68947	4.03436	0.91684	2.33708	2.0644	1.52899	0.416175	1.26455	1.8537	1.20406	0.764293	0.737039	0.222524	0.329597	0.37689	0.184664	1.34069	0.322564	0.591035	1.04223	0.338671	0.0777994	1.04298	2.64881	1.55979	0.927479	4.94244	0.424353	1.46827	0.379725
ACCN4	0.0220781	0.078711	0.0239701	0.0263219	0.00987897	0.324144	0.00658083	0.133992	0	0	0.0111899	0.0429577	0	0.175571	0.0480665	0	0.0960936	0.0466956	0.0714458	0.0112488	0.0528388	0.0329935	0.00782549	0.0250928	0.00987055	0.0160757	0	0	0.0105326	0.0064702	0.00650961	0.0141788	0.0249274	0.0347153	0.0101774	0	0.0883876	0.048951
ACCN5	0.0545509	0	0	0.0690183	0	0	0	0.329703	0.534006	0	0.0488948	0	0.644012	2.59073	0	0.156353	0.0258395	0.0115715	0	0	0	0	0.00463683	0	0	0	0	0	0	0.0400852	0.00569111	0.209776	0	0	0	0	0.0846983	0
ACCS	3.7402	17.3546	7.80382	3.27575	1.4452	8.23002	7.23918	6.33852	4.55724	15.0288	5.06385	1.76265	3.79768	14.3557	3.14503	2.57355	5.87086	3.10516	4.83698	5.85663	1.94124	5.01686	2.90915	1.81799	2.32294	2.85597	3.41626	0.4943	1.54085	1.60536	3.25816	4.39506	5.43362	16.5294	5.93646	9.00674	2.6682	2.1135
ACCSL	0	0	0	0	0	0.023186	0	0	0	0	0	0	0	0.462805	0	0	0	0	0.0671993	0.00457895	0.00537041	0	0.0042682	0	0.0281498	0	0.00919338	0	0	0	0.0157631	0	0	0.0613849	0.0381868	0	0.0213396	0
ACD	3.93999	2.95868	2.71296	2.27872	2.46953	9.17294	5.54687	6.22882	0.917234	2.79965	6.43479	2.75398	4.81147	5.31152	4.85883	2.37447	3.19256	1.99489	4.11953	2.67245	3.05789	5.23962	3.84726	2.19562	5.03825	3.09268	7.22124	3.02612	5.68383	3.42393	2.41084	2.69368	3.4154	3.84757	4.62749	3.76032	3.40017	3.23681
ACE	12.2346	10.3303	3.24248	5.04383	18.6032	6.27643	4.59535	5.53626	6.2574	5.15363	15.2581	16.1182	10.0574	7.19723	4.26015	10.9295	9.02204	1.236	6.69874	17.5107	10.5251	13.8318	11.8792	8.5056	5.39732	5.55941	8.11943	6.28802	17.7116	7.95012	7.30364	4.09574	6.9604	6.56327	14.2016	8.23675	5.0442	2.65502
ACE2	0.0459495	0.110579	0.0192605	0.00528085	0	0.202475	0	0.0358993	0	0.00559089	0.0134724	0.0246203	0.0197896	0	0	0.0873715	0.741441	0.00536394	0.138589	0.130527	0.0317218	0.120528	0.0375173	0.104895	0.0177675	0.0257396	0.0770782	0.0616658	1.40348	0.0465846	0.0287344	0.0113914	0.0200287	0.0502068	0.0109033	0.00461234	1.46229	0.023578
ACER1	0.26017	0	0.249832	0	0.0146008	0	0	0	0.105629	0.19726	0.0321608	0	0.158156	0	0	0	0.0637558	0	0.0170732	0.0415476	0	0.098765	0	0.0656627	0	0.059135	0	0.0188859	0.0855225	0.0384038	0.402651	0	0.0354164	0	0.463028	0	0.0630273	0.0373891
ACER2	1.48815	0.56899	3.02244	0.813657	1.66493	0.294463	0.466097	0.773771	0.0150011	1.28331	0.903911	2.16002	1.52023	1.27624	0.22367	1.92126	0.83283	1.01771	1.52566	1.23941	1.35985	1.76105	1.07942	3.01707	3.20728	2.77709	2.89295	1.70248	0.966205	3.25621	0.701124	0.844788	1.78963	0.931138	1.20773	0.685825	1.507	0.634511
ACER3	2.46175	2.00728	1.61402	2.43069	3.1493	1.62818	2.81739	2.17165	2.14269	6.7498	3.06338	1.69287	2.51417	5.10544	1.08475	4.5011	3.43039	3.30751	3.63166	5.70946	1.87884	1.77818	5.86015	4.29912	1.84227	1.48303	2.51556	0.93854	1.87883	2.13672	2.5733	2.69417	2.63677	2.22538	1.96278	0.38825	1.11442	1.80965
ACHE	0.466559	0.0258837	0.0523143	0.120868	0.227871	0.330278	0.146433	0.380574	1.54321	0.045527	0.0514405	0.069982	0.217822	1.17603	0	0.100601	0.0872728	0.0261705	0.109131	0.122244	0.00434909	0.0311265	0.122907	0.259232	0.0396997	0.0423429	0.0162956	0.0269069	0.0208019	0.625667	0.0597944	0.153148	0.110793	0.23617	0.376691	0.127264	0.110714	0.0320805
ACIN1	30.7819	43.49	39.6445	37.8597	20.0922	48.6697	58.9357	109.422	58.4306	76.0417	47.6144	54.588	65.6193	74.1653	49.6265	43.6766	39.6544	72.6016	52.265	36.128	61.3432	36.3636	22.2088	25.7008	41.5104	51.368	44.4542	34.4863	40.8002	24.8651	48.5422	60.0082	66.7605	75.2722	75.2244	111.834	62.7107	49.7085
ACLY	72.2234	19.9696	18.7759	29.9436	19.6792	27.37	33.3739	40.2905	19.1759	15.529	32.9067	55.7788	43.8555	24.8912	16.3322	65.1942	20.1444	21.9166	16.0433	36.232	34.9482	38.2904	79.1419	39.3724	52.7889	39.2511	82.3083	66.2864	55.1374	77.2699	31.1174	30.8926	48.787	29.7573	37.9934	37.2535	32.3519	22.6696
ACMSD	0.0220576	0.352612	3.08666	0.871121	0.148435	1.43849e-09	0.302801	0.162233	0	0.961574	1.00088	0.376372	0.15008	0	0	0.31268	0.18118	0.0322246	0.393229	0.00704014	0.387454	0.107259	0.918426	0.0835175	0.111427	2.41714	0.0211251	5.65381	0.599524	0.0487576	0.223504	0.491229	0.141277	0.607037	0.346273	0.0550633	0.516759	0.299087
ACN9	1.16053	1.09273	0.822202	0.474276	0.74446	2.00152	2.28044	0.220127	0.803633	0.450822	0.49021	0.876071	1.18181	0.613264	0.29311	2.06032	1.50408	1.75534	1.45463	1.23933	1.26647	0.802891	1.95328	2.51073	0.94069	1.91227	3.13309	2.15606	2.18948	1.55146	1.58952	4.33787	0.837353	0.469692	2.71167	0.0161042	1.25923	0.739516
ACO1	9.40605	22.8403	8.81685	4.70061	10.6135	5.77543	5.47979	3.99025	16.1135	7.97637	8.24321	5.21119	8.02591	10.0319	5.53075	8.25615	13.2552	7.76409	23.5877	29.0366	6.87863	11.2018	36.1547	33.0405	6.8076	6.9953	7.7372	15.7006	26.3323	14.4167	10.6311	5.06174	15.0885	7.6569	5.86283	6.06119	8.16324	6.62321
ACO2	49.3034	19.9727	14.5006	14.1788	59.0637	28.5387	37.0581	23.1085	8.6465	18.9873	23.9706	29.8238	27.6289	19.4951	8.51024	18.2968	16.014	15.7882	22.5273	41.609	32.145	31.6512	43.9219	35.7368	46.2958	27.6677	51.4783	58.1328	40.4577	26.3167	24.2188	29.6771	33.192	35.6428	25.7897	23.7787	17.3626	16.0105
ACOT1	19.789	6.52209	4.78511	7.1114	8.21663	3.88515	13.091	5.95718	4.69701	4.53101	2.96274	3.56018	5.5359	2.93821	0.637768	5.35156	3.17934	2.90988	11.6592	15.0915	29.0047	5.33186	11.041	20.1857	4.56874	7.83724	5.3968	17.8361	9.6482	24.1985	3.89744	17.8827	7.46413	3.27097	2.7844	14.7052	4.4374	4.12455
ACOT11	1.04326	2.83023	0.310806	1.10701	0.963295	1.10689	1.02613	1.75315	3.73901	1.88357	0.740856	0.385695	1.24327	4.04551	0.230476	0.833106	2.02585	1.51356	1.72482	2.9055	0.941145	1.90056	0.422745	1.97869	0.496352	0.356156	0.288863	1.82023	1.64772	0.315762	1.04762	2.73959	1.72727	3.26492	0.851809	0.658374	0.514561	0.702377
ACOT12	0	0	0	0	0.233237	0	0	0	0	0	0.0409954	0.0809571	0.027028	0.107304	0	0.00936964	0.0216631	0.0291872	0	0.0124467	0.00973482	0.0139503	0	0.00821877	0.331508	0.00592332	0.0333411	0.0520297	0.0349564	0	0.0143128	0	0	0.0659359	0.0148738	0	0.0646306	0.128995
ACOT13	1.3055	0.739695	0.407346	0.868892	0.620958	1.08004	0.391294	0.458893	0.464791	0.560586	0.79858	1.42586	0.822835	0.518367	0.569443	0.703529	0.810358	1.12618	1.09375	1.76359	1.70073	1.22937	2.34144	1.06893	2.65996	1.6759	2.20514	2.52579	1.40193	1.91735	1.0293	1.99484	0.528151	0.770783	1.13874	1.33035	0.852237	1.11215
ACOT2	18.1096	13.1546	4.08858	8.75196	20.1348	7.8826	15.8478	28.1398	9.17998	10.7285	9.14941	8.77591	10.7953	11.1785	4.4971	10.1193	8.58787	8.31237	17.29	49.0748	29.1782	19.8821	26.8188	37.6249	11.0718	21.9613	17.5488	19.5457	19.0559	32.5217	11.433	22.4091	18.1305	15.0468	9.73052	40.5364	9.1877	8.73146
ACOT4	3.17345	0.547789	1.46047	1.556	2.03683	0.221909	3.92351	1.96641	0.216646	1.76062	1.80099	2.1998	1.22817	0.857029	2.57218	1.08053	0.60495	2.33416	1.00587	1.9202	5.50365	2.52522	4.06894	3.47849	0.559262	4.20132	6.06851	8.94413	2.65003	8.59643	2.74774	3.38195	1.8267	1.09287	0.423691	2.89559	0.496588	1.82205
ACOT6	0.0430306	0.659893	0	0.145512	0.128859	0	0.979762	0	0.393149	0.216245	0.26495	0.116441	0	0.22683	0	0.0603287	0.0466917	1.15442	0.131236	0.0733323	0.117905	0.0935789	0.147124	0.271477	0	0.0651927	0.0548392	0.12492	0.248694	0.211964	0.15431	0.0331821	0.0258915	0	0	0	0	0.107755
ACOT7	32.7597	2.09312	5.75072	5.78125	7.89484	15.1718	10.0379	19.3293	5.58308	0.662072	6.81556	2.38343	10.799	5.17218	0.996632	2.74993	3.95224	4.14838	4.36094	16.4228	14.6949	10.9368	24.637	23.1528	24.5163	11.3757	21.6791	7.42375	21.5094	15.8052	8.66003	8.80413	7.11107	8.70414	6.24187	4.35518	5.25314	4.88632
ACOT8	3.3237	2.55489	1.39982	3.37211	4.22354	2.68214	2.72588	4.93044	1.24559	2.65011	1.86131	2.2388	3.91024	3.34629	1.332	2.57612	1.54223	1.52065	1.58453	1.83324	3.53486	1.99863	2.65999	1.99206	2.335	2.55645	3.80108	3.95262	2.71905	2.8373	1.38479	1.61401	1.78108	3.6566	1.34876	7.29316	1.7502	2.43537
ACOT9	7.83202	13.8272	11.0719	7.2962	11.8598	11.7773	12.5656	16.3446	18.9778	8.62499	8.99508	5.29004	14.8079	16.4477	2.58288	15.1644	18.747	13.4644	22.1256	19.2239	7.52325	18.3988	22.928	18.1804	13.1073	4.35121	3.54534	6.27805	16.5502	22.3515	17.2875	9.86111	14.9693	17.6796	9.40854	5.4316	18.6367	12.1631
ACOX1	32.7552	16.618	9.47776	10.9605	18.3124	14.6734	9.27801	12.4725	9.75022	10.6286	13.5327	12.1087	21.1708	10.6409	7.82159	13.4058	12.556	10.9279	14.4458	28.4108	10.9337	16.9284	40.7205	34.3757	33.2051	26.9047	20.6072	22.1512	20.3558	19.4691	12.9921	13.9176	13.6613	12.5704	30.7232	11.7973	14.5547	11.0155
ACOX2	12.0414	5.92766	5.71569	3.5235	6.37985	1.31104	0.901897	1.5992	3.64046	7.86045	28.8766	1.11838	2.57284	2.48784	4.51792	9.34166	3.32102	2.78199	3.93678	2.72641	3.16268	7.53938	3.8206	2.87608	0.760626	20.231	1.09438	14.5644	0.293513	0.721767	12.6471	2.6066	3.72231	1.11171	1.58553	4.0417	1.31679	2.42414
ACOX3	19.9892	8.86792	15.5467	10.4539	5.34887	11.2349	14.6356	19.0825	8.1104	12.2998	10.3798	14.2006	34.4529	9.68533	9.65976	9.11191	6.60783	26.6082	12.128	13.0415	5.75326	13.4872	16.3179	14.3225	13.9563	13.8292	7.75049	12.7262	5.79247	17.7808	13.5422	4.57447	15.8633	19.7118	22.6101	14.1197	21.3401	9.43754
ACOXL	0.0214676	0.0715196	0.328879	0.917315	0.0540595	0.0261673	0.017922	0.55254	1.10026	0.0699434	0.997005	0.0148786	0.0895198	0.0616278	1.21119	0.85305	0.286698	0.0403407	0.238071	0.0889005	0.0682263	0.0487773	0.003177	0.555089	0.134804	0.156295	0.5639	0.011701	0.12485	0.220399	0.00394603	0.95988	0.0707421	0.554672	0.702836	4.98007	0.219418	0.154197
ACP1	20.4547	7.51774	10.0247	9.10414	21.6016	18.8925	23.7375	13.7069	12.37	27.3177	18.4786	20.9732	25.5947	18.0224	15.9731	17.5979	13.9198	12.7609	16.0074	13.1932	21.0749	11.766	25.0841	14.314	21.1609	28.8815	19.9819	44.1505	31.3826	21.8983	18.5026	28.0997	14.6553	17.359	16.598	35.3483	17.244	16.5348
ACP2	15.8106	3.02835	3.64286	5.72678	7.41276	4.46838	4.29427	5.56165	0.87523	4.41827	2.95969	7.54868	7.41115	3.44393	3.09213	2.01492	4.14263	1.86774	2.03867	6.96723	8.4416	7.14439	5.48575	6.82572	3.82469	8.0774	11.0248	7.71736	5.13425	6.10034	5.44252	6.95287	3.39452	4.03805	3.23138	7.08657	2.9137	3.59566
ACP5	38.5413	18.4149	10.4271	20.5004	35.6888	15.271	23.6603	47.0909	43.8691	15.5455	25.5248	26.0666	24.7256	31.1941	5.34286	9.29469	52.447	7.35143	8.96928	232.251	12.6422	11.8022	16.6586	22.0477	38.7531	52.0397	117.558	55.1535	31.9283	42.5043	23.7741	21.8557	16.0514	76.7172	7.31132	21.1727	13.7596	7.63816
ACP6	4.84077	3.69472	12.7709	7.84125	8.48485	3.98165	2.30974	5.3171	4.60982	9.17351	12.9779	8.91124	8.09948	1.36173	3.5974	5.52707	5.64707	14.2978	5.93211	4.0901	5.43716	10.0152	4.90228	2.95064	4.46451	6.80733	3.33399	6.5871	8.35778	3.54481	8.91245	3.22116	9.22243	4.99658	4.0164	7.5356	9.10592	3.86216
ACPL2	1.66854	2.93827	2.0352	1.89269	2.12724	2.58843	4.36656	2.55446	2.19336	3.79995	3.39305	3.46624	3.50358	1.99328	5.44987	3.02267	2.48136	2.79458	2.98698	1.47066	3.18336	2.32913	1.57292	2.89367	4.64455	4.7351	3.48952	1.04646	1.88647	2.70432	2.22247	1.72542	1.83859	1.84694	2.63234	1.84992	2.25084	2.88527
ACPP	2.0598	0.62111	2.63553	0.465265	5.83121	0.415617	1.96846	7.06994	0.26334	1.30218	0.584443	2.17054	1.22444	1.13871	0.0127958	1.9003	1.75806	0.617953	1.19499	1.84694	2.56777	1.42712	1.13893	2.53417	2.43091	1.19946	1.34574	1.71016	0.730504	3.02338	3.44871	1.65806	3.10013	2.01747	3.36884	0	2.54356	1.75275
ACPT	0.0202155	0.191537	0.428631	0.0592915	0.101994	0.129079	0.26404	0	0.0833881	0.310476	0.0755943	0.0138318	0.0276035	0.012572	0	0.0574908	0.016648	0.400538	0.0535443	0.0967522	0	0.00545177	0.0181312	0.012758	0.0113399	0	0	0	0	0.0223255	0	0.0317109	0.0371361	0.938569	0.0151693	0.0507359	0.128708	0
ACR	0	0.361422	0.71861	0.0727153	0	0.189999	0.187164	0.305313	1.146	0.487538	0.311684	5.80814	0.352135	0.789806	0.0349775	0.310264	0.637017	0.611562	0.932527	0.66407	0.229684	0.144286	0.189565	0.050042	0.0611506	0.0631038	0.139317	0.107972	0.0177571	0.0875536	0.345398	0.0622396	0.382671	0.63183	0.476375	1.41952	0.310897	0.215811
ACRBP	1.02868	0.854312	0.741769	1.09315	0.66489	1.80709	1.52576	1.31125	1.09005	3.33421	1.32892	1.10546	1.57424	2.07906	0	4.01916	1.48024	0.0205953	0.812716	2.93094	1.91513	1.2141	1.04963	1.5733	1.96708	0.804068	1.05173	1.37443	1.38011	1.70838	1.17261	1.42085	0.822688	2.29845	0.871434	0.556202	0.930828	0.994367
ACRC	1.62812	3.76486	2.65362	3.13239	1.62371	3.09031	7.39507	9.4609	1.9301	4.60879	6.4003	3.58364	3.50486	4.01788	0.00713555	6.39873	3.42034	4.15326	8.8791	3.86952	3.60225	1.63788	1.19934	1.23112	9.1043	1.73194	0.918213	0.69297	1.26553	0.892461	3.5363	2.96021	6.01671	2.44478	3.72435	4.03994	7.25398	1.58996
ACRV1	0	0	0	0.412843	0	0	1.6421	1.32322	0	0.113176	0.058867	0.203385	0.706755	0	0	0.639524	0.0205889	0	0.019639	0	0.0376381	0	0	0.0539001	0.0282947	0.0343413	0.0530015	0.08794	0.00752253	0.0111333	0.0544372	0.069351	0	0.0956207	0.0374062	0	0.0488731	0.112883
ACSBG1	0	0	0.145171	0.0125565	0	0.0481942	0.10073	0.464504	0	0	0.026735	0	0.011756	0.00540581	0	0.0611915	0.226116	0.0765485	0.0853699	0.016115	0.00629733	0	0	0.042624	0.011782	0.0230175	0.0081075	0.14414	0.00502121	0.00616903	0.249673	0.0135495	0.0158809	0.0564282	0.0324365	0.00547162	0.080278	0.0701925
ACSBG2	0.0139404	0.137938	0.462033	0.269901	0.109184	0.0833021	0.069204	0.093894	0.600793	0.592364	0.235387	0.153011	0.647669	0.470213	0	0.356743	0.248741	1.57057	0.81387	0.0710335	0.038225	0.109162	0.140074	0.0440076	0.0831127	0.0380634	0.0297835	0.0135094	0.0277122	0.0175954	0.280724	0.0786766	0.118603	0.0222286	0.249677	0.114438	0.192923	0.395801
ACSF2	7.91536	8.32003	6.34825	4.97438	7.02015	9.74314	13.7144	7.95232	8.42015	6.7515	5.32655	10.0554	11.7615	1.7546	17.7527	4.8352	6.28317	9.64306	17.7566	14.3417	4.36059	9.51798	13.0899	18.5176	5.39784	19.9732	23.6375	17.0744	30.1538	11.6167	9.52004	5.76106	9.13652	6.46748	14.4401	16.1174	5.31469	4.56871
ACSF3	6.57888	8.87527	9.95284	8.13145	5.57	22.4147	9.8074	13.7173	12.576	8.91745	9.45504	6.35147	8.65389	18.9354	8.86846	7.44867	7.32004	7.65925	6.32329	7.26459	2.84307	7.75336	6.46944	4.50002	8.77866	3.2686	8.25286	3.31459	6.41777	6.70493	6.47869	5.90629	7.45854	15.4755	7.33532	12.5788	11.9991	6.50237
ACSL1	7.45373	43.0383	6.31183	5.88802	14.1573	20.7299	14.4296	17.4266	16.359	8.40476	13.7555	4.71219	11.0447	31.9911	4.47564	9.98036	16.8716	18.1957	41.1743	86.4312	7.33347	12.7265	116.829	128.522	11.1448	2.04619	13.7005	7.06918	36.1095	22.4343	13.0056	11.7849	50.7286	37.1466	17.6929	9.39177	17.6924	11.0671
ACSL3	27.6213	12.0478	17.7134	12.6897	20.0266	15.3052	12.4494	12.3877	11.108	18.1472	17.3795	18.3587	25.7863	12.0273	25.6244	30.0626	18.5127	15.9877	14.3155	12.2196	12.7706	17.5212	20.6762	18.3532	16.6404	19.6545	33.8409	47.8318	24.6664	33.6677	21.93	19.1644	18.7621	10.165	19.3523	7.6628	21.3164	17.0436
ACSL4	4.0452	7.45862	4.57293	5.61541	6.07151	9.74859	2.49323	2.70748	8.27544	3.98976	5.69724	1.51272	3.06629	7.29884	6.3967	4.88881	12.9722	5.25855	9.64162	11.5307	3.93938	9.37248	13.6465	15.2784	6.35185	2.43914	2.85448	2.8807	10.1321	7.18399	8.43363	3.78565	6.83663	5.69387	3.76945	0.39854	7.64697	5.75079
ACSL5	2.62224	6.13661	3.09043	2.91044	25.6367	3.2289	11.857	2.62746	6.25497	7.58978	3.4631	3.52388	2.76838	8.25312	3.55327	14.8691	6.6667	2.43821	8.10631	12.4196	5.91432	5.52316	6.66615	7.38079	4.59167	17.6871	2.39266	1.78823	2.29649	14.9779	4.47621	5.01465	5.40909	6.42798	3.69734	4.52576	3.92549	2.82745
ACSL6	0.115241	0.0560799	0.203092	0.0683009	0.178476	0.0932827	0.0936815	0.0470823	1.02023	0.263119	0.0615659	0.126555	0.423901	0.33823	0.00529139	0.0974167	0.0938748	0.116999	0.123572	0.15722	0.0488552	0.0129757	0.640271	0.0443603	0.108358	0.0171082	0.0370203	0.473853	0.429306	0.114147	0.0485578	0.17152	0.0975884	0.849169	0.393396	0.0675927	0.23516	0.0788374
ACSM1	0.40277	0.938252	0.474529	0.233223	0.908914	0.764392	0.61516	1.04098	0.169711	1.03227	0.840747	2.27976	1.62137	0.605582	2.49919	0.897426	3.02815	1.28059	1.90626	0.918455	0.541158	2.22103	1.87753	0.723064	0.510599	11.6537	1.03562	2.74375	0.732176	4.29609	0.258449	0.932456	0.881092	0.868706	0.901924	0.226157	0.44399	2.21167
ACSM2A	0	0.00287843	0.00255079	0	0.0063026	0.08895	0.0189165	0	0	0.0177669	0	0.00783363	0.00589873	0	0.0153464	0	0.0566135	0.083062	0.00285018	0.0868777	0.0905847	0.0668738	0.00249524	0.0421137	0.00236105	0.0346131	0.00541783	0.00409497	0.19023	0.015478	0	0.0276425	0.0318295	0.0132979	0.00974719	0.0137268	0	0.0140606
ACSM2B	0	0	0.00634857	0.00785453	0.00985803	0.139239	0.0235446	0	0	0.0055254	0	0.0268731	0.00734628	0	0	0	0.0623798	0.00794587	0.0390939	0.105379	0.108065	0.0631165	0.0187734	0.053167	0.00591087	0.0625489	0.00677266	0.00896305	0.269636	0.0077513	0	0.0296015	0.0892047	0	0.0688042	0.00340836	0.000327158	0.0116843
ACSM3	0.452472	3.64286	0.950177	0.711296	11.3251	0.495156	1.56356	1.15778	0.155406	1.75782	0.261602	1.23084	0.819883	1.66011	2.59372	3.36224	1.61186	2.90355	2.16423	0.954304	0.445149	1.50996	0.318041	1.27082	0.509276	2.81078	1.01663	0.818509	0.946457	1.62109	0.797011	0.943813	1.90851	0.648562	1.14893	1.12872	1.21905	1.22185
ACSM4	0	0.232699	0	0.0222688	0	0.218696	0.0775063	0	0	0	0	0.0207739	0.0727441	0.00950507	0	0.0324352	0.0250115	0.358625	0.040253	0	0.0732649	0	0.143442	0	0.0633179	0	0.00964582	0	0.0224936	0	0.049578	0	0	0	0.171496	0	0.134188	0.0248108
ACSM5	0.620252	4.44571	1.57337	0.66426	1.50596	0.239299	0.866401	1.09215	0.204961	1.5262	0.239213	0.692387	1.0087	1.9729	0	0.919377	1.47463	1.57339	3.7744	8.22106	1.06325	0.592822	2.4669	4.04974	1.68708	0.282239	0.158288	0.993215	1.05658	0.747732	1.11726	0.519329	2.6142	1.73345	0.881348	0.203647	0.818008	0.552012
ACSS1	3.71186	4.28279	1.8036	4.99137	10.7357	2.76321	7.77409	4.43278	4.47859	15.0936	4.12386	8.45256	5.89773	7.73218	2.64097	7.385	3.39514	2.41279	2.82208	4.56715	4.639	5.89569	3.82326	2.53383	7.47487	3.70696	14.8402	6.79098	4.12271	5.29065	2.10038	5.19314	5.1489	7.52403	10.8445	15.0415	3.869	2.52213
ACSS2	5.87638	16.8004	3.90771	5.06013	6.64678	8.42506	5.50084	12.1486	5.88883	9.74668	6.62682	6.83169	8.03351	8.35341	2.21829	3.88189	7.60247	5.36219	13.2981	22.0319	6.62852	8.38044	12.7476	16.5571	9.26103	8.58775	9.24945	5.42777	8.43437	10.2816	5.68873	6.05103	14.4478	6.12843	4.98364	8.10011	5.27281	5.42666
ACSS3	26.6755	24.5144	1.94972	10.5219	2.08473	1.42061	20.0061	30.1233	8.75854	12.846	14.3492	2.61492	26.7173	25.4219	15.4244	9.07014	16.2873	11.303	22.5677	9.27101	12.6897	4.97004	16.9351	20.6591	1.55499	17.1576	14.7979	0.869087	13.8056	47.9769	8.30468	7.48263	7.5524	3.86521	4.33254	1.6619	14.7881	4.63432
ACTA1	0.431696	1.12873	0.282627	1.74403	1.17449	168.582	0.469046	2.26499	5.22078	0.201074	1.057	0.561155	0.492402	0.323563	0.00318584	0.56457	1.11814	0.853436	1.39724	3.11518	0.667348	0.679706	1.2382	69.9663	0.465219	0.17109	0.211537	0.19708	7.75986	1401.38	1.51221	1.1092	1.20299	19.91	0.960061	0	5.99729	12.0965
ACTA2	233.571	557.108	388.711	644.326	204.982	933.418	95.8449	253.831	239.079	141.648	156.631	72.3262	257.347	331.767	151.353	181.828	522.014	261.806	653.963	1097.53	350.414	880.098	125.729	772.067	320.816	166.594	122.704	121.044	198.036	616.561	584.481	147.152	660.225	353.996	269.602	146.083	717.837	488.551
ACTB	0	2710.65	5032.94	5486.24	5960.6	9975.19	4193.54	4768.65	2306.25	3064.08	2530.53	2092.77	3056.16	3161.07	1488.75	3337.36	4549.04	2283.95	3566.52	0	0	0	0	0	0	5174.17	0	0	0	0	0	3978.7	6103.57	5339.01	3139.68	3297.43	6637.67	5228.86
ACTBL2	0	0.154163	0.0651324	0.113998	0.0201421	0.205491	0.0143972	0	0	0.120495	0.0171064	0.0250136	0.0564892	0.213474	0	0.00652267	0.0389151	0.0135923	0.812917	0.0114662	0.0201948	0.0656477	0.0292534	0.00568329	0	0	0.0230798	0	0.0215888	0.0560678	0.0464409	0	0.135456	0.0318326	0.0161873	0	0.0720439	0.0257701
ACTC1	0.0239802	0.267451	0.042315	0.213326	0	0.0389236	0.0286637	0	3.41628	0.00270508	0.0522757	0.00533181	0.0390678	0.0953063	0	0.285512	0.204629	0	0.040754	1.33133	0.04506	0.13653	0.144028	0.918519	0.135864	0.0765934	0.124957	0.151468	0.0232125	15.9394	0.0747449	0.0713135	0.134187	0.0391842	0.136127	0.00874544	0.079954	0.0264868
ACTG1	3640.44	900.459	2314.89	2298.85	1993.97	2925.62	2273.92	1988.45	909.41	1258.6	989.738	1511.32	1971.71	1247.19	922.706	1661.4	1362.78	1262.88	1257.9	2415.01	1861.92	3520.79	3778.87	0	0	2185.48	3277.81	3873.47	3207.68	2664.12	2059.8	1978.17	1762.45	1973.87	2027.22	1635.15	1840.43	2289.73
ACTG2	1.76282	39.1034	6.08109	6.25426	6.20724	65.0759	0.923743	5.25896	13.9009	2.54839	6.88294	1.14169	8.28173	21.8738	1.90012	12.2034	28.3266	5.78241	50.0301	139.397	3.84593	12.9317	1.14231	24.9275	5.22511	2.12898	0.904401	1.43926	8.56951	10.524	4.521	2.60298	25.6185	14.8321	5.34573	0.436919	15.7814	25.7531
ACTL10	0.10195	0.169256	0.263018	0.217195	0.164082	0.0206321	0.828219	1.2212	0.171753	0.388063	0.25692	0.352325	0.423515	0.169795	0.0457806	0.201864	0.0954581	0.142947	0.0426898	0.0649743	0.0714665	0.0238901	0.0793775	0.0281571	0.149752	0.197133	0.983223	0.0833391	0.216697	0.154327	0.149496	0.314597	0.0772887	0.422242	0.194231	1.2915	0.14558	0.105268
ACTL6A	32.1743	11.0167	14.5565	16.1595	30.232	33.1935	14.3937	33.146	7.37841	13.5678	17.1763	16.6892	11.2174	5.35375	23.1411	18.6703	13.2576	19.2607	11.6854	15.626	33.7391	22.4918	47.7291	24.6587	29.5879	28.5495	26.5612	49.896	20.9158	25.4237	20.8198	20.9253	16.1915	9.45176	19.8007	14.0748	15.6201	19.3727
ACTL6B	0	0	0	0	0	0.0280021	0	0.648627	0.029015	0.21723	0	0.77902	0	2.18658	0.139389	0.0124651	0	0	0	0	0.00652317	0.00469407	0.0260097	0.00550726	0	0	0.0111576	0.00633793	0.00520915	0	0.0127112	0	0.0403046	0.0011225	0.0131696	0	0	0.00953621
ACTL7A	0	0.0962454	0	0	0.0421946	0.0451859	0	0	0	0	0.188065	0.0129025	0.0644185	0.622682	0	0.0536531	0.0931849	0	0.199846	0.132089	0.0211057	0.0354852	0.0112375	0.00593958	0	0	0.0240584	0.0273405	0.0112387	0	0.0136837	0.140639	0	0.0579454	0.113312	0.0355733	0.00924215	0.0615741
ACTL7B	0	0	0.0340347	0	0	0	0.0139808	0	0	0	0.0239947	0.0395101	0	0.0958882	0	0	0.0158524	0	0	0.0183968	0	0.031075	0	0	0.0161691	0.00874211	0.0122838	0	0	0	0	0	0	0.0369556	0	0.0362879	0	0
ACTL8	1.28928	0	0	0	0	0	0.0619108	0	0	1.14565	0	0	0.0580767	0	0	0	0	0	0	0	0.089064	0	1.45677	0.0442315	0.0716563	0	0.00448468	0.00509094	0	0.0668909	0	0.0779156	0	0.250606	0	0	0	0.0239846
ACTL9	0	0	0	0	0	0	0	0	0	0	0	0	0	0.0473919	0	0	0	0	0	0	0	0	0	0	0	0	0	0	0	0	0	0.0447921	0.00874328	0	0	0	0	0
ACTN1	53.1229	44.7368	53.3785	75.4554	82.692	159.711	24.232	57.4742	36.4422	32.7657	40.7332	13.0766	36.5937	54.8894	22.3028	31.5779	65.6659	41.5276	68.1114	127.901	56.4672	122.497	61.5728	96.5683	42.6124	43.8036	46.6182	18.3018	119.414	115.123	82.9571	30.0611	70.7536	68.3739	42.362	31.2538	82.689	68.4526
ACTN2	0.110845	1.17531	0	0.287468	0	0.37732	0.357653	0.496221	1.26498	1.0871	0.19627	0.00754984	0.0607395	0.392011	1.53396	1.82532	0.432038	0.663399	0.139271	0.380306	0.0444857	0.133758	0.253043	0.396067	0.0890418	0.0196898	0.038269	0.0432418	5.96579	101.489	0.40455	0.0677602	0.0896842	0.261574	0.106706	0	0.221504	0.123576
ACTN3	0.00878915	0.215426	0	0.0327481	0	0.00318614	0	0.0055565	0	0	0.0222776	0	0.214586	0	0	0.133794	0.117705	0.0464765	0.0888822	0.00559768	0	0.0703558	0.101248	0.063817	0.0442061	0.00399985	0.00298284	0	0.00262064	8.57377	0.110158	0.0423382	0.115781	0.249345	0.0877966	0	0.0219917	0.0109617
ACTN4	466.738	119.002	105.286	100.108	187.412	464.225	114.28	405.971	89.7299	98.1319	111.36	96.93	167.919	123.556	57.7007	109.11	125.685	113.351	167.199	316.289	389.455	375.693	240.576	186.286	173.168	278.476	217.358	198.05	270.669	405.585	160.303	198.596	178.098	184.499	180.212	116.701	186.299	144.941
ACTR10	18.9414	10.9499	9.46281	9.48117	19.2696	9.54818	10.182	8.95895	5.79338	10.0921	11.6944	12.0688	13.5837	11.5324	17.4466	10.8139	10.2232	7.27537	11.3476	14.0233	12.9616	16.5719	16.8547	15.8625	11.3739	12.8422	13.7505	21.0779	16.1317	23.3629	13.328	11.3537	8.88306	4.46562	12.7201	5.80289	12.1289	11.4495
ACTR1A	28.3488	9.22194	8.04108	15.4688	13.8163	15.7076	13.3287	15.9315	8.12817	10.3187	10.9681	9.84237	16.4447	17.2379	9.38582	14.7134	15.592	7.22795	13.4661	21.8079	22.9891	24.7635	28.2101	19.3511	33.302	23.0929	23.8888	27.4272	18.2794	30.1372	17.9672	21.5364	18.0205	17.6756	13.294	8.42819	14.4164	16.099
ACTR1B	12.4114	8.77309	7.95352	8.69815	11.8189	13.6376	9.32725	24.2421	10.6354	9.67293	10.6643	10.3328	10.2954	11.4803	6.95414	9.5671	8.82481	10.1694	10.4602	16.4821	17.4054	18.0475	15.7368	12.7922	6.44125	10.4957	20.2891	11.1662	19.4826	13.3463	12.2557	13.6991	15.5808	14.7284	11.9087	22.8928	10.7202	10.2309
ACTR2	84.2347	29.8046	29.8759	34.3507	69.0538	40.5778	39.5462	29.3502	27.5605	25.1879	36.1926	27.3526	34.9836	22.8887	33.6234	53.342	45.1454	19.5499	27.3915	43.9436	46.249	38.8864	62.932	62.9915	60.5134	46.4575	48.4935	63.4208	61.8947	69.0703	49.3005	26.15	26.8706	17.8271	32.2639	10.587	36.1816	34.5731
ACTR3	72.3319	29.2291	40.7857	40.0399	61.2729	90.4396	53.1279	49.7462	48.2611	42.4308	41.7494	27.4738	43.6788	41.5216	66.1418	62.2799	53.5337	31.8881	44.7503	56.667	27.4577	46.6803	83.5776	65.9483	80.8408	37.1784	55.8892	55.0972	61.4754	71.648	83.391	66.6623	46.6554	37.845	41.2776	20.6771	51.7946	46.3295
ACTR3B	6.62436	7.62031	5.74563	5.41828	4.69144	7.3986	6.54077	4.7413	5.68588	7.79973	4.82199	7.07702	3.91417	5.25377	8.06531	9.05302	5.83383	8.77107	4.92355	4.42461	5.2543	5.4305	3.85877	5.04294	4.96275	4.83832	4.38834	7.80156	6.57739	3.78219	5.73507	7.31656	5.81268	5.57656	8.7855	5.83241	5.59623	5.67827
ACTR3BP2	0	0.0329061	0.323877	0	0	0	0	0	0	0	0	0	0	0	0.062824	0	0	0	0.0674364	0	0	0	0	0	0.00285727	0.00264709	0	0	0	0	0	0.0199677	0	0	0	0	0	0
ACTR3BP5	0	0.0261682	0	0.0118651	0	0	0	0	0.993462	0.0124678	0.0100865	0.0332076	0.0221375	0	0.0501444	0.0806256	0	0	0.0536095	0	0.00601396	0	0	0.00101547	0.00225307	0.00209086	0	0	0.00661529	0.000492675	0	0.00424138	0	0.0435878	0	0	0.0079403	0.0176219
ACTR3C	8.35064	5.7977	6.98731	6.70319	5.90515	4.41965	3.31984	5.0148	4.23614	6.40042	4.87833	8.28617	5.53831	6.8704	11.9584	10.5664	5.71962	8.12029	6.18449	5.12292	5.78902	6.65702	4.24757	7.47355	4.84487	7.58144	6.12946	7.61524	13.5299	3.9385	5.37348	7.65629	6.41476	8.05551	8.72481	4.37283	6.40272	5.57773
ACTR5	2.43146	1.67389	1.4038	2.08606	2.05079	3.2143	4.35836	9.79129	1.46776	2.04188	1.76728	1.78927	2.49266	2.15162	0.40715	1.68785	1.50503	1.68741	1.94192	1.73971	2.16276	1.5154	1.34166	1.66436	2.95933	1.49542	1.56127	0.95237	1.32964	1.68499	1.50651	2.79443	1.37329	1.80946	4.77626	3.7778	1.42034	1.50022
ACTR6	15.656	4.77325	5.66564	6.45383	13.3719	5.12529	15.6617	5.6768	5.97377	8.91211	7.56764	11.9689	9.97441	4.76483	21.8048	10.7848	6.1192	6.48564	7.08158	6.2451	8.29956	7.59197	12.6183	7.87109	13.3353	9.88967	7.97381	11.9991	9.39502	11.5838	8.1574	10.561	6.8912	4.55052	7.5126	2.82172	5.779	8.38919
ACTR8	4.26634	4.12207	3.97899	3.43031	4.71796	2.81451	3.44366	2.07948	2.29622	2.25073	3.50664	3.669	4.20746	3.67673	5.61593	3.4826	3.89306	3.27814	4.04542	3.8757	3.71749	5.02846	3.87827	5.06478	4.81965	7.36987	6.23543	8.07952	2.93389	3.78516	3.91807	3.1863	4.20537	1.97373	1.9867	2.78794	3.82698	3.54276
ACTRT1	0	0	0	0	0	0	0	0	0	0	0	0.0256249	0	0	0	0	0	0	0	0	0	0.0352266	0	0	0	0	0	0	0	0	0	0.0220531	0	0	0	0	0	0.0101911
ACTRT2	0	0	0	0.0116232	0	0	0	0	0	0	0	0	0.0259885	0	0	0	0	0	0	0	0	0	0	0	0	0	0	0	0	0	0	0	0.0174866	0	0	0	0	0
ACVR1	12.8688	22.3494	14.4217	11.8634	12.529	22.6668	13.183	18.1177	18.1168	12.9839	14.1542	18.4464	19.6729	17.2495	16.4235	16.5287	23.1941	15.0199	23.168	21.0341	12.1002	32.4141	20.0534	28.1777	11.8701	27.1119	17.5471	19.4621	15.1861	24.6538	21.183	12.0777	18.2094	13.082	31.7492	7.06164	21.808	20.1297
ACVR1B	6.62284	1.84615	2.7386	2.10888	3.93722	1.97228	3.94193	8.7019	1.80471	3.13574	2.41611	3.86931	5.33501	4.21849	1.73662	3.07919	2.26104	1.6451	2.58346	3.59941	3.39092	4.15369	4.80311	3.05008	2.82789	4.67809	0.691912	4.37246	3.67158	3.95258	2.85884	3.20661	2.4081	5.00685	4.14566	2.67368	3.11624	2.89591
ACVR1C	0.0246415	2.35377	0.00261696	0.0349869	0.0290672	0.237247	0.0331418	0.012292	0.147139	0.258069	0.157864	0.184184	0.455938	0.701853	0.00263074	0.209792	0.586607	0.157582	2.81239	2.0918	0.0503412	0.214282	1.72622	3.21918	0.035412	0.00623179	0.0465978	0.00597235	0.0179461	0.160279	0.194434	0.120208	0.910892	0.643579	0.28274	0.00180883	0.24261	0.241057
ACVR2A	2.54599	6.65862	2.77133	1.89985	3.72316	3.04165	1.66733	2.66728	5.0255	2.33669	2.82907	2.54006	3.6651	5.0706	3.60508	3.87681	6.18694	3.33874	7.4185	4.38986	1.86264	4.87209	3.84414	4.94416	3.82096	1.19171	1.00849	2.1059	1.47318	4.09806	4.66076	2.36619	3.87568	1.66436	6.30022	0.744445	4.20744	4.40425
ACVR2B	2.58361	0.973733	1.6303	0.870069	0.585115	0.910417	1.19882	2.01079	1.74703	0.600481	1.05074	2.01608	1.12776	1.64324	1.81588	0.86955	0.695996	1.50587	1.60439	1.21966	0.810884	1.02297	0.458625	0.722386	0.642216	0.898211	0.78462	1.61095	0.815323	0.555657	1.22982	1.73413	2.25217	2.64823	1.6062	17.3198	1.3654	3.56
ACVRL1	3.76083	6.20411	1.64676	2.51341	5.59349	4.08184	2.27858	2.62181	4.5132	2.56136	2.27936	1.71336	3.8079	3.86548	1.64993	4.14698	6.09255	2.02992	5.54513	10.5709	4.24747	7.18171	8.24658	6.86834	5.15831	1.37649	2.40317	1.96984	2.14716	5.74139	4.58361	2.66676	4.97082	7.45948	4.18825	3.80235	3.43027	2.59804
ACY1	20.5973	3.3831	4.74156	9.01498	18.9903	6.66921	20.9701	13.4947	2.95083	4.81965	12.4244	12.191	10.3214	6.17584	5.1939	22.6528	3.81424	3.85984	7.10093	17.5379	11.6158	15.9032	16.9748	17.9896	12.6576	22.6424	44.1095	39.4918	24.9758	15.0723	10.2643	7.70102	12.6094	11.3656	4.94396	23.1632	7.67865	8.52058
ACY3	0	0.153336	0.0743198	0	1.08675	0.0839421	0.335656	0.504752	1.73402	0	0.2754	0	0.215415	0	0.0185297	1.03206	0.485219	0.0925648	0.236845	0.0537852	0.307092	0.858618	0.0315215	0.0997171	0.100483	0.0862225	0.262384	0.15299	0.0125836	2.42064	0.0839805	0.123718	0.328385	0.129112	0.0473441	0	1.31863	0.125896
ACYP1	8.50008	1.53452	4.44543	2.99467	2.78416	7.12672	8.74669	3.89762	2.97145	8.0165	4.66143	6.11481	4.01706	1.99464	4.91606	3.58459	4.07266	5.8926	6.82989	6.77801	3.78949	9.80104	6.37865	4.25057	5.70919	12.1941	14.5636	10.3752	2.01439	3.94716	5.1433	6.99565	7.44918	2.14108	7.25184	6.9682	3.75955	6.14339
ACYP2	2.20871	1.49648	0.836341	0.711816	3.50663	2.26779	0.392274	0	0.389847	2.4743	1.84305	1.83846	1.78598	0.727879	2.04413	1.94088	1.07833	0.958338	2.48064	3.08043	1.90489	1.48182	3.74139	3.63815	2.80426	4.14068	5.31452	7.20714	2.46984	2.23723	1.54813	1.56473	1.30423	2.04959	1.07404	0.366946	1.19279	1.71847
ADA	8.81491	7.58387	7.93342	8.1254	5.1393	15.8098	9.88328	20.7089	10.4815	6.76374	5.67407	2.31141	9.22683	11.5479	2.01197	7.48612	11.13	5.07711	7.45696	10.9335	9.6406	7.72999	8.60788	15.2438	11.1998	5.67892	5.39074	8.80319	7.93284	8.20081	9.34867	10.1024	7.01604	8.1368	9.33711	4.05928	5.63167	7.58058
ADAD1	0	0.181088	0.425828	0	0	0	0	0	0	0	0.0171819	0	0.0377509	0	0	0	0	0	0.0456762	0	0	0	0	0	0	0	0	0	0.00407338	0	0	0.005426	0	0	0.0311585	0	0	0
ADAD2	0.0166251	0.134603	0.0598836	0	0.0210578	0.0203087	0	0	0.215738	0.0347459	0.00790187	0.00866876	0.0434254	0	0.0399848	0.00903115	0	0.0469094	0	0.0918016	0.0140641	0.0134302	0	0	0.0105242	0	0	0	0.0112221	0	0.0285079	0	0.0622679	0.0635707	0.046616	0	0.0607452	0
ADAL	2.8695	2.40842	1.30289	1.2787	3.20239	1.52357	1.79006	0.97537	1.18966	3.10546	2.57821	2.77399	2.30178	1.32011	5.86744	2.64885	2.914	2.60942	1.80191	3.4712	3.0912	2.115	4.07519	2.69815	1.67711	3.11341	2.53599	4.73902	2.28302	2.67653	3.07652	1.28458	2.21724	1.59902	1.45404	5.38048	2.13902	2.26004
ADAM1	1.85754	4.13862	1.09643	2.72869	0.257303	0.988312	3.03314	0.866657	2.47102	2.89851	3.12736	3.18381	3.47351	3.07989	4.10804	3.82758	2.25794	5.87933	5.33679	1.66473	1.24693	0.965378	0.966767	0.446787	1.54232	1.46929	0.569858	0.289314	0.56705	0.405093	2.11928	3.877	1.83918	1.45679	4.64509	2.38799	3.97015	2.32383
ADAM10	49.9012	34.6005	30.5139	28.1415	91.48	33.5149	26.5956	32.6243	31.7618	27.9491	30.8576	29.545	42.242	43.2213	24.3478	45.9273	42.3686	23.9725	40.5054	48.6286	26.6803	51.2814	45.8722	68.5443	58.4007	70.9041	67.9685	70.4312	220.607	57.3272	48.803	24.7554	34.4297	42.5299	21.0874	16.619	42.5969	39.9677
ADAM11	0.105804	0.270298	0.0456627	0.0917152	0	0.109687	0.117153	0.177379	0.526616	0.136997	0.141815	0.143814	0.168063	0.118902	0.315829	0.0405905	0.206034	0	0.188678	0.0638033	0.00208249	0.0474065	0.0344252	0.0246147	0.0295329	0.0253475	0.0107197	0.00202425	0.0116179	0.00814966	0.041242	0.0652609	0.0870559	0.235864	0.295106	0.273744	0.103745	0.105512
ADAM12	12.7882	36.7455	32.9455	25.5906	13.8001	13.3683	10.5196	12.4796	25.4373	34.8458	12.7431	1.66168	17.9715	35.0446	26.7827	20.5786	62.7936	22.1114	17.5947	13.4815	12.7461	74.6319	26.9337	46.3062	22.8506	17.7896	3.8728	1.57823	3.81071	60.055	66.5078	11.0708	68.6827	39.8675	29.9532	7.2595	54.0165	35.7751
ADAM15	37.2239	13.0181	12.596	16.8787	50.8348	25.9087	35.8292	41.0598	14.3004	16.5366	14.7311	37.6392	24.0636	14.2189	8.75302	20.171	13.6298	11.3863	13.8365	28.9379	28.3809	25.9934	38.5388	18.5655	30.403	19.48	22.8158	16.477	25.5474	60.3759	22.6547	28.1948	24.3486	25.1233	14.7293	124.055	28.3112	19.4403
ADAM17	14.9214	13.3148	10.6091	10.1115	13.4753	17.0241	12.6039	15.5658	15.4034	11.0094	14.7832	8.96822	15.6388	16.3135	14.8458	16.2346	18.8518	19.0776	16.1986	15.2436	11.8753	16.2454	16.043	15.5106	16.1048	12.7195	8.95857	13.35	10.3108	14.1417	13.5106	12.7777	13.2848	16.8847	13.0114	9.13318	10.6548	11.7794
ADAM18	0	0	0	0	0	0	0.0157483	0	0	0	0	0	0.0382663	0	0	0.0306623	0	0	0.00713095	0	0	0	0	0	0.00522184	0	0.00339815	0	0	0	0	0	0	0.0358569	0	0	0	0.0117245
ADAM19	2.27883	3.40004	3.64694	4.33928	1.34442	5.62161	2.04922	1.77081	3.28472	2.56809	3.79057	0.297526	2.42733	6.48828	1.6969	2.5227	4.71367	2.08676	2.04308	2.16209	2.19413	2.33372	1.49472	2.40948	2.62916	1.12909	0.808163	0.673909	2.01264	2.41483	6.74909	3.00333	3.09545	4.72352	2.50274	1.57827	5.71228	2.48932
ADAM2	0	0.0212709	0.00345405	0.0284602	0	0	0	0	0	0.00751702	0	0	0.0266316	0	0	0	0.0319665	0.00720634	0	0	0.0250179	0	0	0.0271567	0	0	0.00612595	0	0	0	0.0105591	0	0	0.00375133	0.0586626	0	0.00477629	0
ADAM20	0.234217	2.77569	1.38511	2.06694	0.206615	1.4689	0.906199	1.30918	2.07823	1.91518	2.39671	2.70352	2.19846	1.37996	3.19364	4.22988	1.34924	4.9513	2.3131	0.685631	1.00378	0.286096	0.0878281	0.250256	0.251732	0.52884	0.103939	0.0687489	0.384107	0.145228	2.10138	1.11689	2.05879	0.65129	0.823339	0.631065	1.04092	2.99492
ADAM21	0.156314	2.66375	1.93028	1.86193	0.376309	1.88293	0.846165	0.810219	1.86856	2.76708	2.53776	2.55852	2.82584	1.40996	4.19107	4.33981	2.0966	3.34931	1.9629	0.640137	0.647056	0.487335	0.112011	0.409219	0.229911	0.56835	0.0941118	1.12003	0.505667	0.302045	1.57232	0.592418	1.03252	0.689821	0.662088	0	1.22312	2.63225
ADAM21P1	0.0252002	2.17606	1.41942	0.759551	0.232763	1.07127	0.232718	0.446035	0.191122	1.26298	1.07057	1.53306	1.06314	0.66779	1.6471	2.0783	1.22023	0.595401	0.458772	0.248263	0.288927	0.47348	0.0485774	0.104068	0.127494	0.327723	0.0766453	0.502034	0.146593	0.249675	0.893205	0.281033	0.558608	0.429893	0.258534	0.00808538	0.479928	1.04222
ADAM22	1.2044	11.2696	7.65967	3.16434	2.0529	7.54826	1.92772	5.44257	11.1796	4.50949	2.70166	2.03276	4.3721	9.2492	12.409	18.1643	8.95024	6.13961	8.18176	8.21749	6.8409	9.89056	5.94922	12.0192	8.41901	0.718765	2.14658	0.300049	4.66973	2.28818	2.40035	1.45318	2.43297	3.15647	8.85668	0.128983	3.54094	2.8364
ADAM23	0.409848	1.51747	1.84923	0.50742	0.98115	1.29183	0.281516	0.114167	2.413	0.918209	0.686222	0.575782	1.03039	0.673985	2.21196	1.10037	2.38275	2.40002	1.89175	1.78002	0.619149	2.51825	2.17045	2.0521	0.838132	0.514808	0.394168	0.125121	0.659848	3.92706	1.59373	0.843392	1.977	1.25185	2.00228	0.143909	1.4802	1.44174
ADAM28	2.24222	4.89008	5.46608	4.75101	6.1461	1.16606	6.57579	9.53343	19.4608	5.13941	6.69656	5.32431	1.6722	3.35435	3.74083	6.11119	7.83019	8.51133	5.55002	6.86867	5.13872	3.08974	5.35912	3.72302	6.30186	4.75683	3.57287	4.31352	2.76128	2.24199	4.42216	3.83675	4.99542	4.58642	3.79887	4.60748	6.20993	5.86833
ADAM29	0	0.0295731	0.547882	0	0	0	0	0	0	0	0	0	1.27796	0.15847	0.00722777	0	0.0133265	0.00662052	0.128846	0.0405127	0.00892027	0.0169621	0.0258158	0.0125525	0.0466517	0	2.85051	0.00288941	0.00237013	0	0.00880412	0.00639475	0.0187397	0	0	0.16042	0.0279013	0.141256
ADAM30	0	0	0	0.0436683	0	0	0	0	0.0142706	0.00659736	0	0.0465382	0	0	0.0075983	0.00606909	0.0210208	0.575758	0.0282212	0	0	0.00223151	0.0172909	0	0.00233743	0	0	0	0.00498888	0	0.00617185	0	0.00393971	0	0.00965166	0	0.087993	0.00464076
ADAM32	1.36271	2.20104	0.467711	0.240808	3.09077	0.911011	3.55928	0	1.40689	3.01741	2.39575	0.789191	0.920797	2.18368	0.87067	0.769569	1.73877	2.65597	1.81745	1.4976	0.279815	0.917419	2.76295	0.601129	1.37873	0.870294	0.455966	0.8921	1.88018	1.11379	1.20093	1.23047	1.27666	0.449916	0.822711	0.00598848	1.76121	1.31001
ADAM33	0.0950901	9.0795	1.99053	0.221006	0.638104	0.783968	1.30655	1.34101	6.2619	2.18387	0.58174	0.30548	1.58228	3.4511	1.79355	0.788669	3.40378	2.51008	5.41625	2.76537	0.279201	2.88745	0.517107	0.702606	0.0570444	0.128236	0.0564716	0.0157277	0.15538	0.773607	1.43723	0.151151	3.97158	4.20626	2.81581	0.131704	1.71175	1.43468
ADAM3A	0	0	0.182641	0	0	0	0	0	0	0	0	0	0	0	0.0192569	0.0160535	0	0	0	0	0	0	0	0	0	0	0	0	0	0	0	0	0	0	0	0	0	0.00280941
ADAM5P	0	0	0	0	0	0	0	0	0	0	0	0	0	0	0	0	0	0	0.0103088	0	0	0	0.00104151	0	0	0	0	0	0	0	0	0	0	0	0	0	0	0
ADAM6	0	0	0.0126814	0	0	0	0	0	0	0	0	0	0.0685126	0	0	0	0	0.443577	0	0	0	0	0	0	0.107129	0	0	0	0	0	0.00518595	0	0	0	0	0	0	0
ADAM7	0	0	0	0	0	0	0	0	0	0	0	0.00509259	0.0102321	0	0	0	0	0.166377	0	0	0	0	0	0	0.034724	0	0	0	0	0	0	0	0	0	0	0	0	0.00406387
ADAM8	5.43062	0.886295	0.964142	4.21314	3.23816	1.93739	2.24042	9.92082	0.979122	2.14646	1.07512	3.87298	3.62565	1.57142	0.307668	5.64466	1.83516	1.27371	0.709544	2.3038	1.08783	0.546351	1.02369	1.07412	1.6368	1.39929	0.939075	0.191744	0.833561	3.42832	2.7024	2.47523	1.07093	3.46025	0.775075	2.68416	2.05233	0.766082
ADAM9	70.8328	59.7368	65.7776	41.33	66.3435	85.4726	207.989	36.9906	88.7096	57.2608	67.4028	38.8365	53.6901	63.193	72.0255	110.951	106.397	77.5507	57.2767	74.5065	32.1602	61.8877	131.162	101.073	67.7773	29.0843	34.753	14.984	84.501	211.757	77.652	63.4594	46.6094	51.3075	51.5557	15.4016	76.5133	84.9592
ADAMDEC1	6.50839	0.771536	1.2717	4.43982	13.6184	0.615633	2.87038	2.1927	0.495361	1.0616	2.34158	0.39125	1.10149	1.21429	0.351978	2.90011	5.21387	1.21567	0.89625	11.1813	3.17332	0.351234	0.343914	1.83618	13.6408	0.261855	9.04409	0.25683	1.42811	0.328557	0.819831	2.47395	0.209616	3.9658	0.70195	0	2.06207	1.17561
ADAMTS1	8.08964	35.4084	5.71433	2.37077	3.95058	11.7191	5.87127	7.09002	19.849	7.64586	7.93095	3.14297	9.7229	11.1483	11.9287	6.9831	28.2039	13.0117	31.3071	38.1033	6.88237	21.6388	54.4912	18.1457	3.45166	1.32119	1.99084	1.41827	4.46776	5.98226	6.36012	5.51766	34.7845	21.6801	12.4315	2.51481	14.9121	8.61644
ADAMTS10	0.967838	5.79269	5.43076	2.75415	1.65569	3.94609	2.62429	8.31002	5.11856	3.76481	2.30534	1.0595	3.73653	6.89536	2.92999	2.35627	4.79862	2.91633	3.13949	5.86295	1.48567	5.82301	3.01618	2.3412	1.7189	3.12201	0.356976	0.235945	1.48897	1.44412	6.05001	1.21962	7.36714	6.9787	3.57393	4.10342	3.74815	3.28656
ADAMTS12	8.78446	12.4879	8.36503	14.4378	2.88183	7.1457	6.76289	4.38903	7.53216	8.41779	3.90988	1.93326	9.15244	14.4072	6.87307	6.5656	12.2176	12.3721	9.50949	7.59984	8.7396	15.6303	7.89028	15.5737	7.397	3.77456	2.49341	1.46423	6.73998	8.59114	30.055	6.93804	9.98138	7.64162	6.50763	4.24593	15.0137	17.8047
ADAMTS13	2.57654	2.20153	2.05226	3.23774	1.33957	4.95494	2.52611	8.03247	3.87228	3.43204	4.04554	4.02528	1.74297	3.7808	5.94063	3.17198	1.72887	3.6967	1.54303	1.69731	0.780888	1.64731	1.77455	0.966432	0.638835	0.733446	0.481601	1.03717	0.807114	0.54792	2.41673	1.71776	3.50775	1.67284	2.21405	5.81448	1.30081	1.27107
ADAMTS14	0.497596	2.78761	1.64522	1.28356	0.0957163	1.85784	1.39783	0.499472	1.8914	1.35107	0.460382	0.022626	0.279907	2.7506	0.131558	1.1348	1.99357	2.42474	0.226186	0.216405	0.209285	1.1252	0.193194	0.29377	0.263231	0.365992	0.0713043	0.00336256	0.108968	0.324864	1.81445	0.642814	1.11381	1.0135	0.640421	0.827597	1.07786	0.782655
ADAMTS15	4.6614	1.84346	12.3271	7.01796	0.740971	0.380007	1.15716	0.358003	0.121779	3.12814	5.4831	1.20807	32.6234	1.56897	1.93116	3.12415	1.53837	1.17341	1.18771	1.92005	1.85365	2.69541	2.5949	1.07618	1.95325	2.34779	1.35887	2.68963	1.38524	0.437868	2.18641	4.51238	3.35211	2.43943	1.30711	1.2776	1.58662	3.41056
ADAMTS16	0.500153	0.934775	3.0378	1.84822	0.274096	0.693078	0.870887	6.82702	1.79926	3.26202	0.621862	0.0924938	0.337704	3.25163	3.14527	3.44231	1.74167	4.00726	0.439076	0.265273	0.333747	5.29949	0.83952	1.49402	1.07761	1.53566	0.0550731	0.0338681	0.191432	8.03865	4.26927	0.218274	7.39752	1.30041	2.48634	0.776131	3.31515	1.77405
ADAMTS17	0.450844	0.992955	1.72959	0.556294	8.49419	0.488479	1.48182	6.11795	1.56811	2.62414	0.772171	0.922714	1.72763	1.78607	3.31782	0.410904	1.27869	1.22988	0.963239	0.995768	1.23172	1.71299	1.12156	1.21605	0.383886	0.746167	0.0502852	1.01963	0.0910783	1.57009	0.914113	0.605911	2.48553	1.71938	0.881516	0.998003	1.51651	0.627813
ADAMTS18	11.0237	4.24741	0.696922	1.76536	0.153514	0.1957	0.355492	0.144148	2.32182	1.00541	0.290344	0.237981	1.27826	3.73932	0.327506	1.426	0.749637	0.0846379	2.69825	1.45182	0.297437	3.04307	2.66299	1.72806	0.1464	0.0783813	0.0355284	0.0163942	0.233328	0.725513	0.757578	0.18778	1.3291	0.89701	0.819225	0.137654	1.61671	0.80844
ADAMTS19	0.368711	0.515593	0.581221	0.556265	0.0321195	0.0196795	0.302791	0.00305625	0.515741	0.468245	1.68785	1.43873	0.945814	0.586838	0.63643	1.54831	0.233801	0.266811	0.285905	0.0289522	1.08342	0.605938	0.152819	0.0347738	0.0534499	0.0108987	0	3.06545	0.00998915	0.765359	0.566271	0.0310118	0.100537	0.0265818	0.178111	0.0440445	0.586772	1.03405
ADAMTS2	10.9813	34.3707	18.9494	22.2228	4.68634	21.1572	12.4067	16.1155	18.8451	23.0802	7.95249	2.0666	10.0644	26.4608	13.2135	12.8543	27.4235	11.954	13.5419	11.2769	9.0415	60.8118	14.6546	18.0475	12.697	5.55572	2.97528	0.60822	5.80343	25.3371	35.6757	7.20346	25.6848	28.4096	15.0273	9.66752	27.949	22.4443
ADAMTS20	0.349187	0.912329	0.301655	0	0	0.00696545	0.163354	0.127138	0.705752	0.552552	0	0.00295973	0.244222	0.808129	0.108787	0.00953454	0.0713191	0.0938245	0.0344917	0.012121	0.0110804	1.1055	0.00622122	0.00801852	0.00354273	0.0231211	0.00135851	0	0.00378381	0.267755	0.0141327	0.0325891	0.199079	0.0732423	0.0328376	0	0.263261	0.00945593
ADAMTS3	0.154132	1.51542	0.315968	0.14062	0.531136	2.08433	0.125625	0.138464	2.77957	0.338286	0.271084	0.122357	0.395775	0.901043	0.370981	0.392651	1.90592	0.324849	1.90973	0.516944	0.205647	0.502486	0.329394	0.924671	0.213852	0.0891281	0.739853	0.0651209	0.1291	0.461541	0.391051	0.178967	1.00951	0.567326	0.418591	0	0.622546	0.532864
ADAMTS4	2.78036	1.71951	3.56796	1.6552	0.872176	7.30537	1.46682	3.07904	3.69886	1.5126	1.83421	1.00281	1.18251	2.95143	1.95239	2.2863	3.48028	1.89242	0.700837	3.49519	1.8127	2.29831	12.9103	4.69304	1.65547	0.646959	0.365162	1.14242	0.557515	1.42753	3.80319	1.22575	2.86004	5.28936	0.611318	2.10452	4.50948	1.94803
ADAMTS5	0.505403	4.7646	1.65208	0.423824	0.617371	1.17821	0.862732	1.39841	1.34312	1.38605	0.372365	0.293489	0.991796	1.37265	1.59843	0.787934	2.89219	0.782847	3.78263	3.04749	0.399364	2.59666	2.98491	2.3829	0.704725	0.369959	0.250615	0.24051	0.0634762	1.03834	1.78234	0.319497	3.08672	2.16244	0.957887	0.154092	1.15711	1.40739
ADAMTS6	0.434296	1.59294	1.96071	2.57459	0.34644	1.21881	1.55786	2.18291	2.03392	1.98077	1.51206	0.125344	0.542169	4.64074	3.81305	1.55987	2.49288	5.32934	1.14988	1.06632	0.668303	6.95382	0.788651	1.00285	0.919143	0.377314	0.137304	0.0759351	0.302595	3.10788	2.4546	0.778018	3.52096	1.50601	1.1249	0.531677	2.78156	1.87673
ADAMTS7	1.08034	1.36365	1.5207	1.4162	0.628836	2.71554	1.11281	2.10001	0.40089	1.77164	1.01837	0.282888	1.24809	1.79528	0.465984	0.862634	1.87865	1.1859	0.516869	1.00693	1.0606	1.88594	0.867259	1.13352	1.3391	0.751427	0.336956	0.234942	0.631181	1.02874	2.12592	0.601872	1.55909	1.98153	0.810822	1.33537	1.38274	0.902295
ADAMTS8	0.0844005	0.00503213	0.11659	0.0302774	0.237863	0.204568	1.2495	0.0085787	0.0289256	0.101535	0.120158	0.118705	0.387723	0.191601	1.29312	0.0982324	0.147369	0	0.62566	0.438474	0.0984721	0.294912	0.30648	0.287783	0.145177	0.0245854	0.0952827	0.201245	0.0603811	0.422645	0.0873651	0.108876	0.607798	0.501201	0.328266	0	0.271367	4.72799
ADAMTS9	2.77255	17.8074	7.28797	1.79164	1.83749	10.7744	3.67415	2.85121	15.7185	10.5003	12.3894	1.87322	8.73994	18.0675	4.73259	8.03478	15.2462	6.75849	14.9776	9.5979	4.51123	8.04537	24.1535	7.3818	3.1985	1.54944	0.898077	0.643261	1.09459	3.39779	5.64937	3.63078	12.2925	14.131	6.34045	2.03542	9.82924	4.60956
ADAMTS9-AS2	0	0.0764999	0	0	0.00643395	0	0	0	0.0388704	0.00900122	0.00725576	0	0.0159561	0	0.0207145	0	0.0479245	0.00862409	0.123474	0.00732494	0	0.00307512	0	0.0398298	0	0	0	0	0.00342888	0.0421645	0.0189974	0	0.0322641	0	0.0131751	0	0.0572329	0.0126874
ADAMTSL1	1.59722	7.21246	1.20192	1.58365	0.929229	3.62509	1.68931	1.2563	3.31403	1.09765	1.23475	0.523558	2.44642	2.00683	0.101649	1.08419	9.32821	1.16754	4.7442	4.79124	1.77228	3.98331	1.49212	2.37019	1.63281	0.507062	0.525739	0.342967	1.23978	1.87442	2.12866	0.93777	2.29707	3.631	2.11779	0.866908	1.98452	0.989585
ADAMTSL2	1.80719	1.11719	1.42866	2.12172	0.689727	2.92228	2.20172	4.04163	0.392118	0.960801	1.45013	1.52534	2.11854	1.45456	1.04051	2.14739	1.12472	1.80346	0.529402	1.81765	2.00385	5.61603	2.6229	3.29388	1.8092	0.667092	1.06566	0.773787	3.03646	9.46728	4.84312	1.56971	4.31005	3.77165	1.20044	2.23172	1.63622	2.02165
ADAMTSL3	1.12647	2.93461	1.6117	0.673413	0.350532	1.35907	10.0605	2.5518	2.42146	0.72573	1.48537	0.800239	3.03056	6.00046	0.755525	1.90824	3.40521	0.603984	2.59773	2.86388	2.54253	1.4021	2.1537	2.84554	1.37769	2.09765	0.422817	0.241253	4.60596	2.1692	2.57437	0.946802	3.99165	1.63661	3.08797	0.145234	1.16461	3.4282
ADAMTSL4	1.51209	35.0663	11.6879	4.53362	2.33266	15.3328	9.94904	13.1701	41.6454	29.253	14.9751	7.92383	4.35192	36.079	14.3612	8.76757	20.2705	19.4362	23.9152	7.40266	1.7426	4.81969	3.92683	3.01465	1.73866	1.11503	0.887279	0.475604	2.02839	7.85808	12.3916	4.20801	31.5243	28.6358	11.0947	37.2894	16.1321	12.7993
ADAMTSL5	0.197756	0.443908	0.103391	0.34058	0.181914	0.0430129	0.268661	1.73918	0	1.04381	0.0835408	0.164908	0.324945	0.124009	1.5708	0.10831	0.125062	0.849857	0.177764	0.162333	0.0985936	0.766879	0.1999	0.127634	0.0196471	0.907965	0.118319	0.293863	0.128411	0.705189	0.233276	0.105845	0.343209	0.179666	0.398462	3.41147	0.281494	0.545648
ADAP1	2.33539	1.31752	1.85101	1.82059	1.41457	2.08875	0.652039	4.56181	1.17222	2.79988	2.77666	0.258884	4.64169	1.38721	1.24921	1.4286	1.33945	0.784256	0.694047	3.00388	5.41987	1.8953	3.37736	2.52208	0.614619	2.30073	3.84217	0.88253	3.36139	2.54701	1.07835	2.97757	1.83208	6.16192	1.55088	3.64943	0.711976	1.39602
ADAP2	6.77341	9.0697	7.1057	9.52345	6.63568	4.69582	11.8244	7.71209	26.1724	8.77429	4.73932	3.40357	4.50131	7.33538	1.12072	6.76145	11.8538	5.07388	5.46177	12.1082	4.82906	2.61108	6.4226	4.86062	8.34964	2.77606	5.33964	4.72666	3.53687	4.91351	9.72585	6.05187	8.3835	6.53366	7.93809	11.7345	5.31327	4.67145
ADAR	134.305	50.1382	63.2829	135.598	85.5137	84.0702	67.039	66.0538	76.198	104.033	124.935	91.492	107.535	66.4278	101.88	147.619	59.9703	89.047	71.5578	75.2133	100.786	82.1083	74.3666	80.5497	101.412	90.2534	175.17	92.632	162.494	82.7996	83.6836	83.0469	64.1773	59.6216	71.9222	31.5443	79.8791	121.997
ADARB1	1.97914	5.15327	3.65505	4.60649	2.23008	10.8358	3.78227	2.88232	3.28103	4.48216	3.29957	1.55276	4.7158	5.41661	1.04238	3.31428	6.23553	3.92245	4.12323	4.7598	2.01398	4.28121	2.42159	3.82512	3.71349	1.20746	0.803098	0.506047	1.76332	1.83156	3.95062	2.47276	3.58961	4.30378	2.71267	3.59712	3.01218	3.70538
ADARB2	0.0185209	0.0106877	0.0235012	0	0.00796071	0	0	0	0	0	0.0182139	0	0.0100517	0	0	0.000160516	0.012027	0.00136453	0.0155142	0.00725147	0.00106568	0.000756131	0	0.00449862	0.000794627	0.0116749	0.0182986	0.00103598	0.00594253	0.00208264	0.00117194	0.0211732	0.000226298	0.0385758	0.0134888	0	0.00154526	0.00543022
ADARB2-AS1	0.0768146	0	0	0	0.0288722	0	0	0	0	0	0	0	0.132214	0	0	0	0	0	0	0	0	0	0	0	0	0	0	0	0	0	0	0	0	0	0	0	0	0
ADAT1	4.02187	3.3175	2.17441	3.62848	3.66837	9.12993	5.34218	5.46257	4.45228	4.19625	5.20817	2.54033	5.73163	10.6486	5.57361	4.46666	5.42735	4.51843	3.70717	4.07008	3.22825	6.37942	6.39488	3.8573	6.15117	3.84409	8.54956	5.24338	7.20663	5.26086	3.14034	3.11412	3.25653	6.65515	3.17945	4.94898	5.42648	4.00386
ADAT2	0.22058	1.5157	0.336174	0.647626	0.413087	1.25707	0.397071	2.36151	2.07281	0.382296	0.659954	0.343843	0.501394	1.54212	0.238226	0.843053	1.47771	0.515188	1.00184	0.735073	0.175121	0.469749	0.230468	0.403228	0.713599	0.214924	0.103104	0.320772	0.226012	0.240526	0.960036	0.681122	0.9752	0.679044	0.734636	2.01677	0.787634	0.521209
ADAT3	0.126283	0.296164	1.79764	0.930374	0.160364	0.77091	1.07142	0.887865	1.16379	0.573197	0.706531	0.71755	0.624694	1.70113	1.40685	0.866847	0.36225	0.685375	0.425922	0.579884	0.434293	0.371176	0.5367	0.180672	0.490603	0.926707	1.00138	0.483125	0.21108	0.433274	0.405075	0.87095	0.887798	1.93251	0.534362	7.57555	1.09543	0.423676
ADC	0.940856	1.42549	5.1502	2.13812	1.11903	1.75502	1.3146	3.26332	2.02655	2.45723	1.53595	1.86397	0.970777	2.3343	2.62601	1.3232	1.74476	1.8868	1.16796	1.60373	0.962962	3.59988	1.48797	1.4478	2.41115	2.25283	1.047	1.68789	0.729665	2.26921	2.11549	2.09273	3.07347	2.51291	1.97578	2.30754	2.1068	1.33633
ADCK1	1.38119	1.42195	1.08292	1.45506	2.27093	3.06014	2.54732	2.67039	3.19491	3.19257	1.21399	0.837273	1.2251	2.56042	0.182929	1.79002	2.49571	1.84031	1.63269	1.89159	3.07582	1.68938	1.45275	1.09992	1.30148	1.88616	1.69968	1.76038	1.67564	2.64597	1.91959	2.21605	2.27451	2.44165	1.27081	3.21681	1.29485	1.35479
ADCK2	12.7721	4.93094	7.19657	5.39813	11.4115	6.21798	10.5326	18.7928	12.5073	12.2737	4.24939	7.61151	10.2091	5.72687	3.35632	4.95218	4.14704	4.90084	2.68012	6.3518	4.18705	6.0938	6.1668	5.96424	5.87057	4.91421	7.36088	10.171	5.44862	9.87614	5.9867	10.6042	6.12992	8.53086	7.95468	12.9624	5.03479	4.31719
ADCK3	33.5119	33.8599	12.5591	11.4725	23.899	17.5468	18.6882	16.693	23.3422	8.72457	17.2067	30.3992	14.851	20.3412	24.6871	13.5668	15.0647	10.8292	31.2948	44.7747	10.6089	19.5935	21.2284	36.4415	22.2639	14.2385	17.2474	19.2066	23.118	19.2668	16.2634	25.4811	26.42	24.3907	28.6558	9.08277	12.5727	12.4992
ADCK4	7.22045	3.40595	3.46819	4.52528	5.64455	9.29187	4.41841	4.71849	1.4022	6.52438	5.62095	4.08928	6.68129	5.94177	6.47765	2.62253	3.1959	7.4025	3.45571	5.41608	6.09835	8.15619	4.7621	2.50226	2.55702	5.69774	6.93253	4.21546	12.1127	5.51032	4.37013	5.94349	5.80163	7.78608	4.52435	26.488	3.67459	4.05156
ADCK5	3.9806	0.390008	1.30406	1.74314	0.784812	3.01614	1.78039	7.40483	1.3127	2.03199	1.21558	0.968261	2.76266	2.99156	0.355877	1.16072	1.17691	2.6443	1.10668	1.14213	2.37318	1.10549	0.52196	1.91177	2.06496	1.02283	1.06251	0.792741	1.15798	0.800917	1.74897	6.67023	2.20648	5.28878	3.50363	3.71848	1.4503	0.982385
ADCY1	6.40671	0.657339	2.21702	4.82654	3.8397	0.167084	0.235645	4.3632	4.84647	2.58989	0.185549	7.46098	1.59728	0.580866	2.60122	0.177656	0.531985	0.262519	0.399063	0.543477	7.25457	3.67892	12.3366	0.362518	0.18236	8.12526	0.145235	23.8175	0.0943053	1.35918	0.768055	0.389063	0.550001	12.0323	0.497355	0.210674	0.485443	1.41731
ADCY10	0.0426057	0.36728	0.147884	0.265975	0.293289	0.104941	0.343632	0.256985	0.889565	0.195133	0.143006	0.376154	0.387978	1.34466	0.0045002	0.30454	0.248042	0.137035	0.246598	0.202649	0.0469628	0.0786668	0.125796	0.0574994	0.709537	0.0826854	0.0441033	0.0440209	2.15567	0.0307807	0.198394	0.0926403	0.219013	0.223909	0.206917	0.280641	0.172987	0.18085
ADCY2	0.0350313	1.53589	0.674654	0.675404	0.0721278	1.45645	3.3205	0.0188783	1.70845	0.67891	0.226007	2.81227	1.49875	0.7387	0.806747	0.164493	2.47646	0.680269	1.47373	0.816568	1.49426	1.07136	0.869965	0.187459	0.104922	0.448211	0.0698415	0.10725	0.163716	3.03241	2.20157	0.0493691	3.91844	0.228804	3.3955	0	0.982214	0.740053
ADCY3	6.72257	11.5892	4.52697	3.19787	6.26954	7.99553	8.17037	8.4196	6.52961	6.10714	7.56234	5.22744	9.06474	10.3878	2.84645	4.99154	9.11581	7.25768	11.8582	16.0604	4.97381	9.45334	7.14281	8.28351	5.77952	4.94179	12.5366	2.42039	7.19756	4.43975	5.44476	5.73985	10.6173	15.1651	8.13048	14.4886	5.48239	5.1811
ADCY4	1.2018	11.8022	2.62684	1.13477	1.3173	3.20721	3.11729	5.20809	5.9153	5.97738	3.12122	2.2884	9.03847	11.5043	5.78067	5.90755	8.05635	3.34136	8.01389	11.662	1.44636	7.06333	4.13611	2.78428	1.54321	1.61811	0.974549	0.827097	1.29609	4.41451	2.614	2.38318	4.97942	4.11766	4.50886	0.516708	3.97732	2.74845
ADCY5	0.816169	2.64188	1.66846	0.721981	3.7295	0.844226	0.0840017	5.38398	1.1076	1.07848	0.603084	0.608039	4.18756	3.29383	1.02444	9.14463	1.50101	1.34196	2.867	6.63551	0.339653	3.16277	3.38945	5.17473	3.60936	0.196957	0.0351003	4.59828	2.06492	0.300842	1.01413	0.42924	3.36893	3.55271	3.7288	0.376663	1.52828	0.459047
ADCY6	13.7514	12.6664	8.44664	11.1707	11.6172	6.85821	14.1568	24.5558	6.89707	10.623	8.09456	12.9752	18.5006	11.2663	4.41462	20.282	7.928	12.512	10.5519	12.4489	8.10842	9.90685	9.14573	12.2972	6.10509	7.09972	8.64339	4.4873	5.66406	6.73202	9.87749	5.32268	12.481	9.42655	9.17637	14.0363	6.56293	7.21434
ADCY7	2.79672	4.18245	5.37002	6.15667	3.50748	8.5054	5.40649	6.76854	5.39685	4.84505	3.21726	1.14241	3.38542	7.77589	0.221039	3.63298	4.70779	2.78512	2.40662	6.13484	1.76291	4.02366	2.84013	2.43372	3.1121	1.62511	2.04996	1.15872	1.35995	3.40224	5.19595	3.82595	3.82737	6.39475	2.609	4.68735	4.49484	2.54585
ADCY8	0.0089951	0.125856	0.00545867	0	0.0268222	0.142609	0	0	0	0	0	0.0678608	0.0126164	0	0	0.0131036	0.00503945	0	0.0568524	0.0095435	0.0179403	0.0558589	0.0264916	0	0.00502227	0.0081886	0	0.00653937	0.00178738	0.109722	0.0798941	0.0121061	0.0425736	0.047432	0.0787966	0.00392539	0.000447577	0.153615
ADCY9	14.2746	5.13151	4.7309	7.53882	7.43068	3.96927	5.07375	19.1976	5.1299	13.1667	6.60094	7.38107	9.18345	7.42744	10.2326	3.04484	4.72921	7.70535	4.79755	3.85698	18.0166	6.41877	5.4047	5.68433	3.88154	17.133	8.74095	3.75938	2.90447	5.43832	4.33969	6.50009	6.92167	11.8441	7.65606	11.3454	3.69679	7.77889
ADCYAP1	0	0.0117407	0.191518	0	0	0.159813	0	0.0148708	0	0.0124595	0.0297845	0	0	0.116758	0	0.0458564	0.150807	0	0.169027	0	0.0177133	0.110531	0.0784838	0.113607	0	0	0.00506034	0	0.116611	0.0607274	0.00291084	0	0.137717	0.163327	0	0	0.133348	0.0564613
ADCYAP1R1	0.0148951	0.841594	0.17545	0.0338753	0.117715	0.139401	0.093669	0	0.195029	0.2258	0.0526005	0.0338452	0.326358	0.484286	0.0760484	0.268529	0.36557	0	0.413273	0.856217	0.0729229	0.372573	0.823636	0.381775	0.058191	0.0325336	0.062628	0.0271514	0.0280194	0.139696	0.222513	0.132689	0.761673	0.338	0.160926	0.00740063	0.284092	0.278477
ADD1	68.5253	44.1183	39.8449	34.0622	21.2206	41.2297	61.5511	69.7259	50.3411	45.4878	44.924	36.9301	56.5327	81.2799	50.1495	41.6772	43.9417	38.669	50.9229	0	43.6724	0	64.9096	49.4171	0	57.4561	48.5056	43.2156	40.7962	70.1616	46.4813	39.3747	55.4104	63.0065	68.9832	57.2118	48.2931	43.4568
ADD2	0.172768	0.633175	0.480238	0.196366	0.112168	0.846322	0.127069	0.436497	0.346558	0.134229	0.248481	0.131794	0.424794	0.631091	0.880828	0.35554	0.447067	0.232109	0.657712	0.964598	0.148706	0.694846	0.724045	0.386664	0.193644	0.0742371	0.0940993	0.197429	0.180731	0.643029	0.270096	0.202425	1.25132	0.898256	0.516093	2.17917	0.267064	0.153035
ADD3	13.2287	28.2201	10.2686	6.3176	9.49434	7.70801	14.2095	14.3958	15.4295	9.71254	8.10389	3.01234	21.2886	16.446	35.5812	10.9368	22.408	8.80347	30.6454	15.8983	13.2928	17.8852	27.4854	24.4185	10.9385	3.30827	2.61901	2.13345	16.7414	20.9626	13.4508	18.8137	17.2532	11.7584	19.0794	2.12596	14.8768	16.6287
ADGB	0.0046008	0.0929144	0.0882107	0.0172455	0.0720058	0	0	0.276153	0.0277647	0.186622	0.032267	0.00964677	0.0549975	0.0746208	0.210961	0.00671835	0.0813568	0.0140537	0.0374704	0.0629536	0.0980748	0.00244576	0.0703566	0.017432	0.00898662	0.0104717	0.739004	0.00501765	0.0562136	0.156484	0.0801835	0.0521642	0.00655232	0.105852	0.0487443	0.00302448	0.0324927	0.202877
ADH1A	0.121564	13.9952	0.634326	0.440222	0.357661	1.64681	0.899291	2.96767	1.99362	3.02119	1.34325	1.11573	2.97192	9.65831	1.37185	1.61927	5.51156	8.55958	17.7767	3.67091	0.590906	0.805109	4.47322	13.9618	0.224441	0.0649945	0.0885001	0.0681156	1.56503	1.36135	1.64879	1.22439	3.73062	2.9933	1.36371	0	1.77846	1.84198
ADH1B	5.6907	376.909	17.5175	5.18191	14.1221	13.0374	8.37926	3.53271	72.1072	56.1709	18.2379	15.4998	48.2533	72.8951	24.5403	39.1123	103.654	49.9831	520.322	197.11	31.5178	31.8624	240.017	888.264	10.4587	0.184043	0.715834	0.616362	5.77787	31.4934	44.5845	13.4422	151.898	59.6255	24.8835	0.645897	39.5298	35.5119
ADH1C	0.113982	27.5673	0.129425	0.207847	1.04855	1.26377	26.4201	2.09129	12.2026	6.09681	1.65659	1.39086	5.50809	4.1146	3.61839	1.72808	13.7351	3.39034	24.5912	6.64822	1.56923	2.48648	9.19617	21.2606	0.492431	0.0331779	0.0990889	0.122527	2.5516	7.0749	1.53924	1.84361	7.29891	5.17458	3.05498	0.0230182	5.27012	3.71413
ADH4	0.0130919	0.666158	0	0.106661	0.0659646	0.455407	0.0966071	0.0245792	1.10171	0.0919277	0.0329757	0.0723559	0.144933	0.240659	0.469899	0.216677	0.686122	1.4281	0.99937	0.0417209	0.151731	0.161334	0.244728	0.28926	0.0512869	0.0119126	0.0209539	0.0285379	0.851452	0.0240253	0.1631	0.187526	0.408915	0.0917908	0.274165	0	0.168953	0.15955
ADH5	18.3112	19.2732	11.8686	10.6327	17.886	23.0804	16.7304	16.195	8.67876	9.82835	9.97249	12.0316	12.6583	7.62824	11.8609	15.985	17.1551	9.3141	18.1107	23.2894	10.6533	16.5077	28.171	25.3797	24.5835	15.1743	16.0909	21.5864	8.86031	18.8769	12.117	13.1539	10.4386	8.58713	12.1188	6.62039	9.16044	13.056
ADH6	0.0773331	1.59445	1.28568	0.638711	0	1.76202	0.49202	0	0.73548	0	0.277485	0.0529757	0.528846	1.73542	2.25425	0.591933	0.908757	3.39825	0.885933	0.148025	0.0361261	0.348636	0.00265017	0.0610084	0.0650514	0.0176786	0.0370624	0	0.149675	0.0426866	0.386254	0.220263	0.391391	0.282287	0.334273	0	0.199168	0.336926
ADH7	0	0.0452363	0	0	0	0	0	0	0	0	0	0	0	0	0	0	0	0	0.0328578	0.0326282	0.0412245	0.0411668	0.0617518	0.00386682	0	0.0111481	0.0470735	0.0178049	0.00365433	0.00409361	0	0	0.0114428	0	0	0	0	0
ADHFE1	0.844712	5.35245	1.58665	1.2298	1.49195	1.70904	3.23838	9.44097	1.90369	3.3172	3.79336	2.79678	2.71469	5.74491	3.51912	1.07614	3.08219	4.66163	5.87103	3.77348	0.90888	2.27535	1.68839	3.32946	0.561249	2.22455	1.07699	1.10274	1.8359	1.14465	1.10621	3.43843	3.26114	2.8744	2.15177	1.47571	1.42994	1.54051
ADI1	2.40238	2.82212	1.29235	2.1504	5.33839	5.2874	3.46545	1.76354	0.8816	1.82043	2.43086	6.08806	4.00193	1.48714	2.24653	5.65367	3.15939	1.32105	4.56943	6.464	5.01738	5.2757	5.49836	9.47132	10.068	15.9299	13.4911	14.7916	11.8811	6.40768	3.63454	3.00479	3.91428	2.77014	3.80034	6.83995	2.90974	4.38528
ADIG	0	0.481968	0	0	0	0.0618095	0	0	0	0	0	0	0	0	0.0337299	0.138173	0	1.12311	0.0773933	0	0	0.0441596	0	0	0	0	0	0	0	0	0	0	0	0	0	0	0.0189678	0
ADIPOQ	0.879338	43.2634	1.12071	0.35227	1.16843	0.921699	0.466151	1.3152	3.65798	3.69257	3.64616	1.41453	3.40437	10.5729	2.19194	3.17289	6.10162	4.86056	35.2457	46.5423	2.57879	2.71036	59.3863	81.7843	1.54561	0.00243091	0.0497378	0.0408049	0.00477806	3.04682	3.48497	1.64252	12.2067	4.13527	3.3203	0.108685	2.72235	1.9256
ADIPOR1	39.0696	12.0776	16.5068	23.2308	35.9301	27.2244	22.7383	18.7981	19.4006	23.849	22.5357	46.2989	41.2624	20.761	17.9218	39.235	16.1089	13.0262	17.8539	25.2696	27.2623	26.0043	44.4659	24.7906	42.845	22.357	43.3946	48.5747	43.9609	31.7553	22.519	0	19.8638	22.0085	31.6582	30.4118	27.5556	35.0301
ADIPOR2	6.05783	3.18835	2.87147	4.71192	3.12968	4.5424	13.4015	3.37079	7.00506	3.51993	41.3611	3.8519	8.68822	5.62962	1.82688	3.47846	3.22675	3.87926	3.3981	4.86849	4.45162	4.12605	6.78408	4.86069	2.66238	4.73076	1.78848	3.53407	42.1128	6.5025	4.13489	11.0242	3.24466	2.94327	6.95235	1.89787	2.35882	7.15886
ADK	58.532	31.2426	39.3365	39.0371	72.8615	58.4863	73.0694	31.6228	11.7173	24.8194	49.0763	37.1724	32.8515	23.2152	21.8868	42.7592	49.0565	40.2307	40.2671	48.9575	51.9582	52.9651	66.8236	68.0848	45.3649	70.3396	62.1712	79.5168	54.9452	88.5199	54.8492	34.0051	37.8694	24.7719	29.8545	38.2458	31.3481	30.1201
ADM	0.724757	2.22721	0.823676	2.07594	0.583217	10.7716	2.66666	1.59597	1.20124	1.99079	1.20736	0.267608	1.46352	0.789297	0.0493383	0.808173	2.36225	0.136931	2.67709	3.85898	0.909955	2.42194	8.44131	3.3955	0.54699	0.126778	0.219738	0.121476	0.965359	2.65252	4.29774	0.745807	3.16001	8.62182	0.832497	0.0351474	3.90729	1.17582
ADM2	0.482221	0.0182166	0.227768	0.082194	0.0955631	0.22515	0.752731	0.166035	0.0157188	0.0516447	0.262126	0.488051	0.286696	0.090783	0	0.297761	0.0666769	0.0429508	0.0759092	0.054403	0.591463	0.0117341	0.165375	0.173417	0.164027	0.0750185	0.219271	0.0584737	0.016375	0.151836	0.173923	0.0986401	0.0647016	0.0786726	0.139264	1.12942	0.0783565	0.149205
ADNP	46.6005	31.2644	26.2173	33.8764	28.9827	40.8889	35.9804	43.9584	41.4922	59.0421	41.5663	50.7279	47.4533	38.1686	98.9847	56.2191	30.1496	46.5224	32.4808	19.6064	45.7254	22.3049	25.8729	27.0596	36.9221	35.4065	27.545	32.7644	32.7738	22.5478	34.774	43.1204	27.0253	27.3764	41.5145	14.5472	29.6222	47.0899
ADNP2	4.06497	4.92694	3.34717	3.98698	3.17664	5.1305	7.00484	2.69565	5.46135	6.05716	6.19158	5.20007	6.73041	5.24051	4.44982	4.23914	4.98772	4.22036	3.87	2.78237	4.67462	3.24891	3.55478	3.3124	4.87709	8.11681	3.56972	2.66999	2.72945	4.07764	3.7868	5.08433	4.03166	2.19754	3.5596	1.95313	3.83313	3.17526
ADO	0.70006	0.291834	0.542882	0.491047	0.489777	0.657608	0.278482	0.62827	0.0341237	0.551587	0.379627	0.351487	0.678586	0.804802	0.0908003	0.289675	0.300847	0.221788	0.197515	0.494276	0.647648	0.314535	0.465429	0.483941	0.550293	0.516458	0.56186	0.311137	0.435155	0.548927	0.262526	0.596664	0.363814	0.733785	0.727325	1.59968	0.293423	0.38759
ADORA1	0.244809	0.0878779	0.304673	0.211296	0.0480489	0.341451	0.0512579	0.108661	0	0.0716857	0.0544467	0.0179125	0.380801	0.0933593	0.0247621	0.112154	0.0575347	0.0724336	0.257892	0.16258	0.098813	0.0687479	0.0914812	0.0977391	0.0356259	0.0124314	0.250559	0.178637	0.024437	0.0367028	0.093948	0.617475	0.181935	0.266878	0.048947	0.262202	0.127517	0.44887
ADORA2A	9.67123	0.270579	2.03035	1.44579	0.64569	0.907233	0.689472	0.335874	0.226164	0.999964	0.911097	0.362747	1.97755	1.33715	0.0892375	1.4131	0.486347	0.289793	0.544358	0.499508	0.505263	0.84304	0.434596	0.765972	2.08435	0.341125	2.03218	0.605753	0.250019	0.806211	1.06011	0.719028	1.16211	1.10641	0.960386	0.657293	0.556628	0.349292
ADORA2B	0.131252	0.742865	0.470055	0.214668	0.87415	2.76799	0.804024	1.09621	2.62223	0.355134	0.373702	0.0953536	0.677789	0.437024	0.903338	0.774506	1.3548	0.340016	0.979517	1.46193	0.315072	0.414819	0.28718	0.754405	0.0812047	0.0565693	0.349308	1.59608	0.95634	0.273908	0.75859	0.236028	0.315115	0.639419	0.317782	0	0.397198	0.326583
ADORA3	2.66043	1.47277	3.13234	6.54338	2.52115	2.50943	9.06157	0.487948	5.46467	2.4756	3.16258	1.6341	2.42612	1.00125	0.922577	4.08244	3.32566	2.74624	2.0108	5.88994	2.52248	1.64058	1.83201	3.37609	5.97781	2.50477	9.59835	5.27196	4.59285	3.02703	5.85027	2.13284	1.56325	1.00066	1.85856	0.27166	1.49896	3.75211
ADPGK	6.80338	6.10525	6.11737	5.09365	8.14253	5.26214	4.41974	7.44056	11.0455	8.14941	6.71359	4.8195	6.56195	11.535	6.19316	6.16101	7.08868	7.79541	4.16947	6.75371	4.32889	5.27597	6.47493	4.95014	3.86466	5.16518	4.67763	4.11438	3.78855	6.18794	4.60493	5.88808	5.20092	6.72486	3.54962	4.22459	5.37969	4.02461
ADPRH	0.487141	0.870653	0.288301	0.388086	0.589241	0.921062	0.307853	0.879283	0.247008	0.490701	0.476701	0.326687	0.333259	0.785584	0.282672	0.550787	0.435904	0.344859	0.360948	2.16429	0.612609	0.767227	1.12581	0.804293	0.600628	0.249635	0.578571	0.338377	0.778809	0.964435	0.637235	0.386563	0.657514	0.765751	0.445109	1.18136	0.619431	0.525416
ADPRHL1	7.73881	1.04429	1.26848	0.775661	1.80887	1.63307	1.80646	0.355836	0.0233775	0.298618	1.80738	1.72642	2.01656	1.46967	0	0.98673	0.619959	0.608056	1.25214	0.753593	1.02262	0.523137	1.38362	2.8319	1.24803	4.11516	7.04501	6.76669	4.91582	2.52441	1.31848	0.74275	1.61187	1.86718	1.51546	2.59569	1.21909	0.895357
ADPRHL2	5.66926	0.618504	1.78072	1.46184	2.62942	2.27282	2.18517	1.98919	1.15992	1.17371	1.27209	1.43891	1.55737	1.01142	1.12642	1.44162	1.46088	0.451575	1.26908	3.76904	3.09006	3.14934	3.49853	2.57437	4.13188	3.1713	3.63367	3.30844	1.55923	3.84502	1.82234	2.4325	1.33076	1.54092	1.58323	0.287662	1.72588	1.11132
ADRA1A	0.0279567	0.732992	0.205443	0.0704724	0.0362003	0.104655	0.405	0.0911781	0.131576	0.587816	0.146626	0.0625189	0.593561	1.41032	1.99687	0.53618	0.67071	0.518693	1.61995	2.17608	0.0207211	0.411553	0.514167	1.83638	0.0379587	0	0.00413934	0.0387818	0.0077159	0.0427186	0.21101	0.0445395	0.3799	0.645727	0.135955	0.0252438	0.280673	0.144065
ADRA1B	0.0964864	0.344202	0.275834	0.160135	0.0063529	0.340894	0.050467	0	0	0	0.171986	0.0864673	0.204878	0.238568	0.409234	0.237583	0.179861	0.0851883	0.251521	0.282477	0.0933702	0.114465	0.107001	0.354236	0.163819	0.0302753	0.0641172	0.0907394	0.0817634	0.0322757	0.179286	0.104252	0.738284	0.208584	0.0917269	0.0146226	0.0904464	0.217203
ADRA1D	0.00946592	0.0351139	0	0.00704715	0	0.0539757	0.0493207	0	0.00804783	0.0893502	0.0179769	0	0.0131893	0.187847	0	0.034269	0	0	0.0446243	0.123603	0.024776	0.0454925	0.019586	0.0806821	0.00529117	0.0086153	0.00333677	0	0.0395175	0.0138759	0.0522916	0.0113836	0.0533643	0.0371577	0.0181582	0	0.0378473	0.0419289
ADRA2A	0.42344	3.9271	1.33207	0.376157	4.53229	1.27316	4.43602	0.182195	1.78597	2.08822	0.643829	0.887918	1.5395	1.03184	2.66225	1.28389	2.83454	1.40854	2.40897	2.88623	2.36926	1.21039	1.83101	1.58818	0.576012	2.86925	0.931347	0.437441	0.132859	0.484739	1.00334	0.369927	1.90316	1.52735	0.449981	0.761903	1.35414	1.4175
ADRA2B	0.0800332	0.709047	0	0	0	0.236777	0.00569868	0.125635	0.332237	0	0.116117	0.0742736	0.357032	0.000817337	0.228878	0.287889	0.178934	0.0693039	0.499384	0.206274	0.293574	0.306775	0.0607138	0.125131	0.0702572	0.114478	0.053767	0.138515	0.0545364	0.189798	0.0253295	0.10735	0.17975	0.120156	0.102748	0	0.217904	0.063498
ADRA2C	2.82823	0.380887	0.130621	0.11771	0.22991	0.964185	0.254061	3.72921	1.31484	0.568238	0.250191	0.0457486	0.998765	5.8334	0.819856	1.21029	0.308488	0.742011	0.523218	1.20317	0.604205	0.901528	1.09289	1.45506	0.22983	0.0542414	0.114486	0.173254	0.16994	0.267427	0.228083	0.737674	0.444492	1.81053	2.31388	0.381785	0.308944	0.262403
ADRB1	0	0.603253	0.0635085	0.0326877	0.00490739	0.0286226	0	0.00554633	0.0149464	0	0.0166774	0.00609644	0.0183593	0.151915	0.0716315	0.11447	0.0881159	0	0.745235	0.684433	0.0459244	0.0304301	0.21507	0.232636	0	0.031939	0.0168712	0.00637639	0.0915508	0.0771361	0.0776152	0.0140868	0.912172	0.131054	0.0640414	0.0455554	0.0921954	0.121572
ADRB2	0.961217	19.9275	7.36721	2.22148	4.58081	3.85028	2.35437	0.419935	8.21617	6.24253	3.27539	4.49382	4.68568	9.41522	2.1019	5.35545	6.66417	3.00836	13.3394	11.5506	1.08283	5.19541	5.99784	5.00014	1.9108	1.44434	0.821971	2.55669	0.811191	2.63152	3.87201	2.09534	5.3351	2.89948	3.64208	0.316474	4.45463	3.42033
ADRB3	0	0.0141579	0.0172427	0	0	0	0	0	0	0.0375253	0.018121	0	0	0	0	0.00690861	0	0	0.0128519	0	0	0.0560579	0.434429	0.00602501	0.00800147	0.00434264	0	0	0.0170739	0	0	0.0458974	0	0.119852	0.0109817	0	0.014306	0.0264152
ADRBK1	33.4099	15.8519	18.8279	13.7615	12.8023	18.1752	89.4704	42.7592	19.7124	24.1847	16.2473	20.1758	22.8089	30.8377	9.41915	13.5969	14.1272	15.7139	11.7617	21.7328	14.6666	19.4659	23.12	12.9923	19.0889	12.5151	26.319	8.48924	10.9317	11.5013	13.106	28.3492	17.4573	30.1073	18.9693	38.809	20.1173	12.6389
ADRBK2	4.52555	7.19986	3.96725	2.34068	4.89618	1.75487	5.51101	1.47304	4.18907	3.6579	4.17432	6.87346	4.11793	6.13295	4.71181	4.9722	5.45229	3.72511	6.73981	7.72738	2.98072	3.47965	8.3826	7.15471	4.88158	2.54734	4.71109	2.63159	2.93843	1.90044	3.91141	4.65589	5.94505	3.31618	6.79441	3.33629	2.5945	4.57557
ADRM1	128.279	16.5569	11.7775	22.4319	36.0124	55.1901	44.4026	48.9003	14.2987	19.0101	17.7106	18.2141	36.6246	18.9302	9.79482	21.1367	18.5535	10.7551	17.0205	30.8799	56.2747	25.3868	33.8612	22.9183	49.1674	34.4262	49.8948	34.3763	33.8801	48.2764	19.4874	76.584	19.2045	57.4738	25.8882	25.9134	20.6221	20.6497
ADSL	38.4208	26.3	20.4898	25.4165	57.1892	47.7732	53.3467	30.1796	18.2154	18.9819	33.7793	25.9633	28.8776	31.6863	15.7723	44.8577	29.3231	19.7604	30.2064	36.6883	33.6822	42.3083	64.2906	36.9874	64.6821	18.9459	51.6531	51.6076	52.3964	46.7942	42.4355	37.8712	34.464	26.5113	29.1446	16.3866	22.0471	27.7496
ADSS	39.2543	15.3343	22.3272	26.4874	33.1506	19.603	28.1576	17.0721	20.3677	20.7121	25.0014	26.9621	15.3151	11.6433	46.1663	46.371	19.2979	21.9482	21.0432	23.4633	35.6141	32.7054	38.6664	36.8794	22.5918	42.5345	32.1679	38.4049	56.7462	45.0314	37.8037	24.7624	21.7032	16.1093	20.1265	12.1349	22.7553	34.0086
ADSSL1	1.83264	4.24405	1.44125	1.28192	1.88514	3.06132	4.10377	2.61079	1.23446	2.85936	1.4314	2.33541	1.46907	2.0569	0.400819	2.98774	1.99401	1.84668	4.7111	3.78856	3.51902	3.41664	2.06821	3.06439	1.3781	4.56455	3.38022	6.45532	6.22178	5.82452	2.72278	2.59756	3.41077	2.53686	1.58877	3.15536	4.48409	1.3177
ADTRP	0.0362663	0.619051	0.155637	0.0857837	0.406202	0.583209	0.0533468	0.00904612	0.243194	0	0.072932	0.0200032	0.542733	0.283983	0	0.124968	0.782599	0.540009	0.671567	3.10828	0.385066	0.958217	0.310393	0.351349	0.132004	0.0725952	0.0278502	0.0263487	0.229428	0.52526	0.444244	0.224468	0.640576	0.383106	0.264363	0.0462803	0.531438	0.302708
AEBP1	347.339	465.502	434.208	550.422	125.501	446.773	232.36	648.386	514	490.046	192.428	114.58	372.374	446.475	711.974	226.368	561.384	379.4	323.581	176.558	261.059	714.751	170.125	376.282	320.202	165.727	59.8222	18.8052	257.595	488.886	1319.54	318.411	670.921	915.043	551.531	419.156	781.946	765.789
AEBP2	4.44746	4.28699	2.73943	1.71059	3.86423	4.66764	4.42872	2.41229	3.44426	2.95286	5.50455	4.9641	4.00667	3.74348	9.75659	5.09858	4.97549	4.82583	8.39949	4.58883	4.88665	4.13942	7.38995	3.94927	4.08568	4.99474	2.27124	3.08	4.62895	4.68172	5.47169	5.57375	5.09397	3.84285	8.54701	3.50598	3.38879	4.09965
AEN	7.44348	2.01408	1.11838	1.25525	2.00319	2.48055	1.09521	1.22809	1.81951	2.37123	2.31274	0.863944	1.81917	2.13705	0.750191	2.08788	1.69189	1.77093	1.536	1.65569	3.63724	2.20475	2.70288	1.59865	1.65632	1.6701	2.04729	1.1386	3.27263	3.07829	1.36309	2.39038	1.6576	2.1391	1.22719	1.3814	1.3171	1.18735
AES	56.6092	30.7847	35.7435	26.9675	43.6171	32.9448	17.4691	22.4343	16.5549	27.7582	47.2065	45.9559	39.4243	17.0346	23.9882	36.9329	29.2386	21.8385	27.4093	51.6569	47.6318	67.5101	70.4695	34.8113	50.0894	64.8275	60.3704	89.798	32.5453	53.1573	20.0695	20.2761	32.8593	29.2271	34.2294	36.0091	33.4929	38.7942
AFAP1	2.79813	3.56697	5.17793	4.27528	2.14126	6.75176	3.61865	5.17654	4.89467	4.40614	3.05569	1.97634	3.3129	4.32479	1.74775	4.55312	4.53346	3.40898	4.4382	5.20164	3.50012	7.92965	5.88239	6.0775	4.96933	2.79741	1.50255	2.41377	2.08566	6.0178	4.36219	2.33948	6.02977	5.87442	4.3378	3.7462	4.49115	3.86743
AFAP1-AS1	0.0195417	0.0372716	0	0.00800285	0	0.0351291	0.112673	0.0136468	0.0153618	0.00566539	0.0363013	0.0198949	0.0150205	0.0092471	0	0.0389829	0.0419492	0.0108828	0.0241546	0.0305213	0.00132882	0.0378332	0.0083499	0.00336566	0.00891984	0.00485246	0.00228126	0.00387525	0.00105868	0.00129886	0.0343059	0.0259539	0.0169053	0.0254514	0.0165632	0	0.0251436	0.0258271
AFAP1L1	2.52209	4.81847	1.0567	1.52876	1.6562	9.33947	3.79232	1.9397	2.98569	3.85219	2.1451	1.27842	4.27183	7.38616	0.533076	2.37651	5.35488	2.29359	6.87697	9.16968	2.23509	3.68609	5.78014	5.01223	2.81182	1.44012	1.1213	1.94206	1.59252	2.18787	4.71294	2.52519	5.37836	6.80996	4.39134	4.7395	3.0566	1.98876
AFAP1L2	2.07313	6.78714	2.60051	1.98141	2.36827	3.46812	2.08613	4.01526	4.32011	2.17763	1.85469	1.41736	3.90558	5.12135	2.99072	2.21899	3.07285	4.38807	7.05681	9.9264	3.70278	10.9159	3.2503	4.27253	7.26471	1.91498	1.07727	1.32988	2.14993	3.1597	4.53376	1.85638	5.79753	3.49916	2.45817	4.752	2.89787	7.36785
AFF1	11.6966	21.3274	10.3156	13.8069	8.28089	8.7311	17.4331	10.1337	20.9301	18.5134	19.6002	19.0724	21.2381	17.8938	25.1117	19.3341	20.7947	22.7053	26.648	19.4177	14.0393	21.3451	19.5215	16.1531	11.1384	28.0036	15.4615	16.5989	9.88171	13.4934	18.2727	20.9589	22.5938	17.6858	19.7581	5.855	13.2546	15.7841
AFF2	0.0446057	0.467237	0.242248	0.173545	0.108305	0.485521	0.0488206	0.515261	0.19443	0.353053	0.170921	0.0707775	0.237331	0.269531	0.309803	0.162739	0.439568	0.236501	0.360728	0.446797	0.119533	0.656345	0.281089	0.168616	0.117429	0.0808642	0.687356	0.0626877	0.0790107	0.202187	0.208333	0.205711	0.280617	0.106653	0.123283	0.0295938	0.307096	1.02335
AFF3	16.1835	16.7991	15.1237	16.9485	2.13562	1.24511	38.4895	11.4853	25.229	28.6841	28.3097	37.4418	137.95	48.1567	34.2241	9.26579	13.8211	45.6641	9.85834	12.631	25.0971	29.9944	16.3901	9.34171	10.727	83.8864	49.3296	32.2189	83.9772	3.33367	15.7876	26.8207	16.8003	9.0703	55.8622	15.2123	7.25862	34.4086
AFF4	12.7042	20.0565	13.5676	18.882	15.2317	13.9244	12.3565	14.6591	25.717	24.4091	34.1563	24.4383	24.9976	18.3843	59.2078	22.6269	23.8626	28.8885	31.9178	16.7159	40.5755	27.6416	28.7057	30.6468	28.6111	36.6272	30.0126	32.7807	41.1248	29.5225	21.0685	13.7305	16.7427	19.8666	17.3002	11.8252	24.166	23.1328
AFG3L1P	0.534914	0.275986	0.467778	0.375118	0.194544	2.13256	0.848162	2.12512	0.171972	0.479446	0.639168	0.500569	0.406447	1.08392	0.324	0.528786	0.397132	0.31964	0.509155	0.770879	0.201027	0.415878	0.328272	0.310914	0.758026	0.0970774	0.424766	0.173286	0.471775	0.136179	0.421071	0.91555	0.965109	0.729072	0.636199	0.10565	0.742599	0.391547
AFG3L2	47.2905	21.0605	23.7403	24.0864	38.3345	41.0757	49.2943	36.1536	31.0828	28.8766	27.8946	23.1787	67.2741	50.7292	34.6799	18.8804	24.3851	17.4049	29.7395	38.2159	27.4325	35.3156	38.2893	34.9566	35.9371	20.1196	33.8542	35.2418	22.5666	31.8408	26.4956	40.0884	32.6205	30.1553	30.8667	25.7312	23.848	28.1853
AFM	0	0	0	0	0	0	0	0	0	0	0	0.0014927	0.0113253	0	0	0	0	0	0	0.00413054	0.00969185	0.00694397	0	0.00409125	0	0.00589718	0.00414931	0	0.116006	0.00475705	0	0	0	0	0	0	0.0128704	0.0071354
AFMID	11.0378	6.94519	8.1105	5.15228	4.44082	5.70514	15.6707	5.81339	4.54021	9.36734	13.3181	23.1264	7.12096	3.33943	6.33661	9.2274	4.01278	6.63064	5.70747	4.71965	6.18841	5.32521	7.98422	3.45389	10.7549	9.34127	9.57482	11.5632	8.57837	8.01357	8.41256	6.57674	12.2162	7.79946	11.8737	29.2406	7.15853	5.37827
AFP	0.0445063	0.562992	5.38621	3.5808	0	0.0411769	0	0	0	0	0.00801168	0.219734	0.184896	0.16944	0.434004	0.054937	0.846711	2.21579	0.349313	0.0324166	0.199673	19.4823	0.00377158	0.457566	1.92475	0.34713	0	0.0138598	0	0.135326	0.0885743	0.0151903	0.462755	0.0545279	0.416715	0	0.113691	0.525223
AFTPH	20.6362	8.95077	10.499	8.84974	13.7244	7.92076	12.9699	13.6109	16.7082	16.8462	20.7089	19.265	17.4025	14.1133	29.2313	16.6123	9.3915	12.6533	12.2943	10.2275	13.5369	13.2757	17.893	10.1495	12.2151	19.4452	13.9866	21.56	22.6902	13.582	13.7458	8.85408	9.50499	7.01737	15.4185	9.93979	10.3994	15.5467
AGA	19.5542	10.5403	14.3731	5.98394	25.6887	12.3709	8.29785	33.6931	7.68601	9.41398	12.7431	21.3484	17.9274	9.6718	5.61867	17.5035	9.59658	6.68787	13.8617	17.379	26.5014	12.2512	36.0792	38.0939	17.6731	32.063	50.0305	53.2674	31.3095	30.388	11.0197	13.4687	9.29227	8.82111	12.1261	23.0421	8.01114	15.7869
AGAP1	18.4219	24.4017	30.0735	22.7249	9.7823	13.6312	38.8745	18.2117	18.818	23.1799	30.318	16.1499	16.5193	15.2583	9.70153	25.6054	14.029	19.9778	28.0205	16.6827	12.7325	26.6336	7.91594	10.1251	14.2757	28.3383	22.9329	11.1231	21.9759	14.0072	24.2195	20.4978	29.61	27.0941	22.7789	44.3527	26.1991	22.2682
AGAP11	6.14971	127.603	39.3768	20.537	7.50813	24.9781	49.8517	25.7679	88.7763	35.0135	46.3294	42.2501	58.2247	54.1905	18.4233	41.1496	58.0803	70.7653	108.823	38.2152	12.576	22.049	10.9512	21.1839	16.2537	21.9665	16.7323	8.37211	14.9108	4.24726	26.159	33.5893	41.2597	31.4645	44.009	13.5603	40.0245	29.1047
AGAP2	0.74923	0.875174	0.979592	0.803721	0.927168	0.317224	0.435988	1.03823	0.989983	0.690992	0.422011	0.377173	0.717659	2.31487	0.676405	0.832306	0.570003	0.622478	0.580774	1.00598	0.267252	0.896227	0.59537	0.728666	0.549306	0.223785	0.443983	0.199997	0.268254	0.296929	0.353019	0.93574	0.851616	1.37428	1.15022	0.288222	0.817985	0.464686
AGAP3	12.6429	10.1598	9.77496	7.14282	13.922	16.6355	12.7975	21.7003	6.22388	11.6434	5.55983	11.7892	11.0562	12.5286	7.3225	6.14896	9.50467	7.8455	8.47628	13.6333	7.03639	10.6904	8.09222	7.45479	9.71724	7.9076	12.7333	8.67417	6.93965	8.3598	8.78287	17.0093	11.7586	18.7103	15.9887	24.1534	9.85992	7.46611
AGAP4	26.6905	111.405	99.4654	83.3988	22.8363	82.6512	101.092	92.8077	194.705	117.019	125.845	95.8356	167.173	120.737	79.3512	117.318	94.1252	202.708	64.8484	48.9305	50.786	47.8036	22.422	32.1211	45.1844	50.8463	47.022	16.175	27.4164	12.9476	77.5442	85.0028	105.337	88.208	140.501	73.365	124.45	84.8388
AGAP5	28.241	119.49	127.906	97.7283	30.366	91.368	132.2	77.5697	172.682	108.362	139.228	123.458	184.549	119.062	123.655	133.651	112.67	230.179	78.3165	58.6532	63.5982	61.528	26.4906	37.5395	61.4751	78.1495	124.967	23.818	48.3894	17.1827	95.1882	90.912	110.188	83.404	155.396	106.809	124.444	95.0348
AGAP6	37.9408	112.549	122.413	108.794	26.1679	118.068	139.342	121.634	265.414	163.577	149.878	105.247	216.752	150.476	72.1695	147.483	118.292	260.064	115.191	63.3322	68.8798	60.6553	25.6288	35.2367	52.9575	63.3999	43.4274	17.012	27.7791	16.0423	99.0393	105.661	124.099	119.376	162.768	106.102	164.8	99.8805
AGAP7	19.1334	64.6038	75.0162	68.4596	16.4594	72.9525	83.4798	66.0629	121.659	79.2011	80.6152	71.1459	118.249	85.9113	52.7665	79.9661	69.1861	169.013	39.1849	51.6132	38.3136	49.7856	14.9218	20.6889	29.9777	42.9148	39.0899	10.859	21.2465	10.847	63.6502	61.7578	77.7754	70.3828	103.314	114.832	92.7736	59.431
AGAP8	26.1195	85.2626	87.1283	77.5153	19.7843	78.5492	120.912	70.7366	162.133	94.4831	103.485	88.4711	155.236	92.6471	68.5158	111.751	90.7029	172.689	69.3112	46.6785	51.413	36.7679	17.8328	26.3282	39.5894	54.3704	46.2348	14.8496	26.1414	14.0237	77.4375	83.1707	85.7279	72.1298	126.497	61.2582	120.628	79.7242
AGAP9	20.3206	104.238	78.082	79.9694	34.4573	80.1609	61.1066	79.3055	148.382	85.3899	110.268	88.7393	121.167	102.141	77.5123	84.5504	95.0093	158.169	84.8781	49.7114	53.1181	38.2302	20.4942	25.8774	21.4436	42.4584	36.3105	10.6608	20.087	12.231	64.6237	59.737	98.4459	74.8996	131.831	89.5718	68.4799	73.3879
AGBL1	0	0	0.0515756	0.0129923	0	0.000580916	0.0159428	0	0.000357437	0.00500715	0.000501068	0.0108783	0.0496806	0.283589	0.0064684	0.0578135	0	0.000898305	0	0.00451999	0.00796401	0.00567382	0	0	0.0396509	0.00323106	0	0	0.0232787	0.475621	0.0859192	0.0272441	0.0190507	0.00280089	0.0138965	0	0.0221863	0.111476
AGBL2	0.585713	0.842027	1.23958	1.53093	0.489364	0.394866	0.939284	1.50973	0.773112	4.53606	1.66387	1.4979	1.87178	0.950656	1.59043	2.32525	0.80388	1.39144	0.493923	0.298328	0.322098	1.22606	1.04612	0.513419	0.142393	1.06947	0.833135	1.14084	0.351249	0.262343	1.08754	1.01731	0.693665	0.455133	2.24072	0	0.363389	0.670533
AGBL3	0.0245499	1.14956	0.344037	0.151967	0.545216	0.281294	0.535688	0.72141	3.58515	0.871061	0.369871	0.473959	0.785519	0.379714	1.59173	1.05061	0.968234	0.729256	1.28515	0.243392	0.102295	0.336335	0.397053	0.214805	0.27815	0.0957741	0.11922	0.32888	0.307368	0.265775	0.316887	0.42391	0.430636	0.359831	0.649192	0	0.669189	0.388
AGBL4	1.10175	0.853124	0.493219	0.724667	1.64493	0.184656	0	1.24065	0.700233	1.44685	0.557786	2.1154	0.824711	0.578278	0	0.33427	0.533278	1.72335	1.09652	0.677627	1.72935	0.531863	1.00679	0.19573	0.276056	1.85146	1.853	1.54379	0.384693	0.61073	0.678316	0.198747	0.911348	0.195044	1.32209	0.430146	0.973479	0.408961
AGBL5	6.61116	3.33022	2.57732	2.27683	2.01563	7.97265	4.4807	7.56259	5.26759	2.87754	3.16253	5.98693	4.29858	4.52701	2.61718	3.31743	2.78978	3.86329	4.0828	3.67751	2.68458	4.82495	5.3296	3.30323	7.35161	4.49082	7.56686	12.2203	3.7107	3.89214	3.73883	5.08815	4.66113	2.4261	7.22605	4.09049	3.69739	4.32848
AGER	0.915988	4.80506	2.76437	4.11938	0.564582	3.88846	2.83026	7.62325	0.435058	2.76581	4.86454	1.81173	4.42487	6.98625	8.13387	2.92497	3.11035	9.54137	3.46526	2.51539	3.40292	2.60613	1.04323	0.403472	1.16254	0.979326	0.678323	0.222456	0.928736	0.604225	2.27262	2.74527	4.58843	6.58301	3.30948	5.61445	5.41971	1.28538
AGFG1	9.69057	5.85752	4.28125	3.99659	4.77202	5.40984	8.65458	1.86402	4.8496	7.21846	7.15829	5.56699	5.87072	4.12864	10.2332	10.0052	7.74316	4.71266	5.77923	5.62445	3.2475	5.04834	5.91924	9.13292	6.82339	8.17891	6.80758	6.18506	5.40111	7.46708	5.58143	5.13183	4.04517	2.75979	6.35056	1.57233	4.48013	4.07815
AGFG2	2.08126	2.66329	1.64824	1.39948	4.41821	2.1643	1.40526	2.72939	5.09575	5.04127	1.50715	3.95686	2.69962	3.07518	2.53863	2.52563	2.33654	1.54094	2.36507	2.75275	1.55857	2.25154	2.24036	1.41363	1.67028	3.97208	2.17293	2.33987	4.45525	4.76289	2.33817	2.28965	3.59898	2.29519	2.11502	4.94497	3.04963	1.4156
AGGF1	21.6374	16.7002	10.2726	20.9595	23.9174	11.4606	22.9535	12.3237	22.794	22.5529	17.2715	18.2301	19.928	13.8392	32.4944	23.3507	14.9007	15.3361	18.2251	13.6784	26.6083	12.6201	16.9512	16.9986	27.2301	20.0455	19.0096	27.2133	21.4548	20.7538	17.8226	20.1224	13.89	12.9152	20.3853	17.6421	14.4933	18.2369
AGK	9.05953	4.89088	6.06003	3.68008	6.24704	7.74913	5.80522	8.79347	3.65277	5.34366	4.34087	6.11279	7.27928	2.53006	3.53214	7.36877	4.9157	5.82403	5.8093	5.25111	10.5634	7.34144	9.51145	8.24684	8.29305	6.87874	6.79426	12.2089	7.71766	10.1416	7.05263	11.5081	6.03934	4.27146	9.74426	1.64779	6.05882	5.23741
AGL	69.0433	19.0261	21.6372	39.6518	9.62532	15.1692	91.4728	16.6733	8.9621	17.8246	30.5712	11.3013	72.7979	42.67	27.0355	5.93384	15.4018	12.5997	14.629	20.4862	35.4621	19.6007	57.1328	23.9748	32.1239	7.55596	16.9915	34.0774	13.0209	53.7825	32.9742	30.4683	15.8231	9.20214	18.7919	4.08765	16.2041	43.8616
AGMAT	0.850303	0.119632	0.362125	0.100329	1.01308	0.229418	0.65892	0.15033	0.8646	0.393359	0.271006	0.198117	0.889825	0.364004	0	0.137817	0.0861754	0.0548971	0.192243	0.115848	0.370703	0.0548298	0.33846	0.32213	0.198859	0.119695	0.355032	0.773313	0.207519	0.225951	0.0934205	0.207293	0.178961	0.311531	0.38666	0.369347	0.350566	0.0955004
AGMO	0.123067	1.02582	0.185027	0.122023	0.183632	0.0417073	0.167622	0	0.173994	0.0805263	0.194541	0.128025	0.192621	0.740261	0.0185383	0.482012	0.505394	0.00771816	0.669114	1.17599	0.0498496	0.2658	0.48543	1.10072	0.12615	0.0140003	0.0229999	0.0260868	0.031961	0.180461	0.139592	0.127237	0.399222	0.120569	0.553862	0.00662731	0.214951	0.085064
AGPAT1	15.0138	11.5778	10.7269	12.1389	6.96686	17.8827	7.56726	9.74597	8.97278	7.49576	8.55521	10.1924	14.4094	11.4557	9.58349	8.56962	7.86979	7.11631	6.32159	15.6458	9.74519	17.1356	9.51553	12.5181	10.8969	13.7478	17.9454	15.1188	10.2317	13.8405	8.50272	10.0765	9.1879	13.0784	10.2423	8.62983	9.2201	7.95365
AGPAT2	11.3357	18.0662	4.13628	2.98416	12.8489	6.65714	3.80984	6.97721	2.52299	7.34086	5.09105	4.56974	5.0701	7.37829	0.520318	5.12841	6.00698	2.32066	10.0634	31.2134	12.9425	8.52072	30.5537	34.329	5.65954	13.4189	4.05411	10.1168	5.27982	11.2465	5.22599	6.23569	11.2483	8.06382	7.17031	8.26802	4.28315	4.75362
AGPAT3	4.9036	2.31081	3.93202	3.82982	4.51697	2.82697	9.75302	4.99647	3.41903	4.33662	4.12806	6.52177	6.29643	5.06221	2.72447	4.86031	2.81569	3.19464	2.23391	5.7255	6.27189	4.20675	6.45069	4.3417	5.79148	5.03415	6.89722	2.55192	5.94108	4.33992	4.01045	6.22465	4.36048	7.8841	3.89983	15.1348	3.08723	3.01559
AGPAT4	0.226825	1.64331	0.942146	0.695966	0.664069	1.05633	0.343768	0.903696	1.9346	0.384889	0.842531	0.167971	0.639272	1.15732	0.671616	0.458028	1.44495	0.662241	1.01748	1.04223	0.300663	1.26107	0.336454	0.638256	0.316497	0.243148	0.0902695	0.0399462	0.283763	1.06667	0.897784	0.380009	0.934116	1.25081	0.582754	0.0725701	0.589199	0.553375
AGPAT4-IT1	0.00704901	1.6918	0.428908	0.615181	0.0552593	1.14968	0.518917	0.140831	1.47879	1.3718	0.540736	0.136168	0.837299	1.06054	0.328071	0.394969	1.25308	0.231139	0.706889	0.175247	0.021082	0.21926	0.0460633	0.0489467	0.0315696	0.019241	0.036092	0	0.0168258	0.0465888	0.598383	0.442231	0.80667	1.64938	0.669586	0.0720509	0.649543	0.650698
AGPAT5	1.20185	1.24183	1.47976	0.35654	3.00445	1.72011	1.161	0.576552	0.463296	0.865252	1.07815	1.14801	1.15976	0.948751	2.78715	1.43729	0.797247	2.11574	1.46453	1.64881	1.33196	2.38081	1.90535	1.84735	3.04142	1.30664	2.16604	1.95735	1.22926	1.99149	1.89419	1.5587	1.0475	0.807152	0.988436	0.298268	1.40632	1.35198
AGPAT6	12.1781	5.9608	6.84023	5.32295	6.38072	12.4025	17.0157	5.17979	6.6382	4.85374	10.2143	5.67587	10.0473	6.19891	5.45336	4.38651	6.39261	7.8737	7.57326	6.19481	13.2585	7.29032	7.98105	5.287	8.1604	9.33725	10.3585	14.5841	19.2674	6.19252	9.73161	13.7277	8.7833	13.5903	10.603	8.50571	6.05169	5.87348
AGPAT9	0.676868	4.85694	0.511659	0.421602	1.94992	1.89218	0.73582	0.769368	4.06356	0.597094	0.771721	0.360313	1.68516	2.69105	1.10388	1.52902	2.72916	0.274989	5.66954	3.07932	0.560027	1.05629	1.36527	2.82787	0.582318	0.332036	1.54757	1.48284	0.564018	1.16119	1.14189	0.516173	2.83185	1.6616	1.03478	1.58524	0.700653	1.03638
AGPHD1	6.46226	4.01605	2.54083	1.90861	6.90141	5.02624	4.72468	8.60741	6.14668	17.6606	8.87914	3.82162	5.54495	2.54451	3.09993	4.38936	6.13259	3.60889	7.98164	3.89214	1.63988	5.75006	7.16192	4.44995	2.69213	3.01009	3.51555	4.79356	5.41243	2.68128	2.91831	3.40797	7.45303	1.81947	3.07145	3.38543	5.44376	2.38782
AGPS	9.2844	13.1252	8.24877	10.0891	8.36241	7.69848	5.89136	6.7489	12.2167	7.00955	18.7928	35.2181	9.50981	11.1754	33.4356	6.91197	11.5444	13.7747	15.1264	18.594	11.4568	21.8883	21.4581	17.0516	6.10236	25.3827	30.935	66.3778	6.71483	14.9813	8.04488	15.5712	7.37184	9.52164	19.7018	23.7146	6.96219	16.769
AGR2	487.081	21.6885	107.913	323.14	1672.8	2.72569	102.976	177.924	265.984	973.608	166.603	176.918	608.508	65.4685	431.696	351.993	49.4506	121.346	25.408	32.1134	1644.19	231.709	182.127	260.995	179.723	620.153	401.34	1390.66	382.857	454.695	54.3819	98.0926	138.126	10.5289	348.945	824.875	42.4272	84.6114
AGR3	99.7242	5.56499	27.7993	71.7847	371.447	0.38301	10.0896	36.5976	35.4191	38.1872	85.4128	76.7386	44.6678	70.3311	57.8497	47.7032	22.4789	32.9438	13.2739	16.651	528.889	232.446	162.326	70.4313	218.127	69.1743	168.61	630.855	137.668	175.084	46.1238	39.8686	32.9161	27.6499	85.6746	38.2498	44.3707	88.4162
AGRN	28.5557	6.57171	25.8732	18.8965	16.9417	56.2737	28.3267	88.7334	8.27511	17.539	9.17758	9.68399	24.9911	15.4674	7.07601	9.40637	7.55689	15.8164	6.79656	24.5144	15.1644	35.205	11.8892	21.5171	10.9079	21.6811	25.3081	8.24668	16.3611	20.0637	18.5135	16.6031	25.4835	25.9674	10.5263	56.4168	23.3071	26.9001
AGRP	0.0811769	0.0286262	0	0.173603	0	0	0.281128	0.0238608	0	0.0298262	0.0245751	0.0270297	0.133493	1.17346	0	0.0558047	0.0974785	0.396773	0.416783	0.16895	0.0909526	0	0	0	0.0458445	0.0368676	0.0644283	0	0.0243045	0.105495	0	0.428068	0.160921	0.343542	0.0438513	0	0.0383004	0.106859
AGSK1	0.346394	0.36504	0.643536	1.58447	0.417879	0.518102	0.45124	0.906779	0.375386	0.619957	0.402328	0.228912	0.321781	0.357271	0.131146	0.575986	0.182471	0.433026	0.165322	0.233982	0.401776	0.283218	0.161471	0.171588	0.194696	0.13168	0.139497	0.0615482	0.642589	0.157854	0.267995	0.433123	0.24801	0.833186	0.468697	2.83713	0.723168	0.6973
AGT	0.730235	1.46812	1.51343	0.816896	0.899392	1.10912	0.524877	0.00618185	0.624409	0.0539294	0.719418	1.13593	0.545943	0.282098	2.44792	0.276624	0.376845	0.184631	0.969845	2.85338	6.24877	1.76182	2.58239	1.99577	0.419184	4.64328	1.68344	0.904724	13.8899	1.9795	2.69165	0.765661	3.21186	0.803575	0.409606	13.1484	1.36588	18.2574
AGTPBP1	6.35604	9.45592	4.09839	3.84915	5.95018	9.47752	6.57211	5.62538	13.1897	5.20724	5.73477	3.55005	6.00678	7.62628	9.93966	5.256	9.23924	6.46856	9.17086	9.1075	3.70647	4.86464	6.58622	6.55098	7.22039	3.39808	3.53578	5.21974	4.05653	3.94247	4.91905	7.04934	4.37757	4.0333	7.65517	0.723468	4.30648	4.54986
AGTR1	6.86616	7.55794	2.58335	5.52391	3.31704	0.205016	0.22969	0	2.45622	1.4568	30.2951	10.2256	3.83377	2.55904	40.0943	0.538638	2.8376	13.0956	3.32334	2.3074	0.412212	2.54696	7.58346	2.44211	0.211978	91.2666	16.959	4.09445	0.0924875	0.518086	5.93793	0.233716	1.40738	0.938151	1.43475	2.10734	0.621697	1.00776
AGTR2	0	0	0	0	0	0.0211791	0	0	0	0	0	0	0.0060377	0	0	0	0.0217323	0	0	0	0	0.205466	0	0.0245855	0	0	0	0	0	0.00634004	0	0	0.0122167	0	0	0	0	0
AGTRAP	15.749	2.34583	6.84457	4.10423	13.4645	9.89498	8.84441	14.0314	5.78105	5.41114	3.44185	6.66476	7.11025	6.99605	3.12846	2.04873	3.1834	1.89584	3.42816	7.1671	6.80009	9.46944	9.3559	7.69157	9.64655	13.5286	32.541	22.6011	5.50866	9.67537	6.28029	9.80784	5.37038	6.7756	4.29768	12.9031	4.4371	6.04234
AGXT	0.0249348	0	0	0	0.00931256	0	0	0.990481	0	0	0.0208282	0	0.0799791	0	0	0	0.0137593	0.110783	0.0442775	0.0583074	0.0186418	0.0402117	0.0148525	0.173124	0.00931379	0.0226837	0.0106311	0.00603767	0.431653	0.0061102	0	0.288931	0.0769193	0.134962	0.0691149	0	0	0
AGXT2	0.0528715	0	0	0.133618	0.00591716	0	0	0	0	0	0.0735142	0.00733034	0.139675	0	0	0.0764183	0.0264845	0.445284	0.0568708	0.0437885	0.0237222	0.00847859	0.0281634	0.00667595	0.103475	0.134727	0.38956	0.161381	0.413127	0.00387696	0	0	0.044604	0.0745384	0.0566644	0	0.0421898	0.0292204
AGXT2L1	0.109988	0.0633645	0	0.153372	0	0.0942329	0	0	0	0.01009	0	0	0.214938	0	0.998963	0.00930545	0.0215246	0	0.112664	0.189687	0.00483352	0.208025	0	0.0367569	0.0108592	0.0294333	0.282801	0.152199	0.108675	0.0427383	0.113817	0.0929482	0.38608	0	0.0246392	0	0.0513932	0.0202595
AGXT2L2	2.81378	7.54502	5.90177	5.25468	4.56737	5.84403	3.18745	8.60036	13.849	10.3205	7.8668	4.46622	7.18627	8.42664	5.91798	4.18993	4.76859	11.7955	7.08324	8.27458	3.5546	5.85352	7.40922	5.27614	2.07066	6.1671	5.46223	3.72966	3.89045	3.50809	5.37343	5.12408	8.59721	7.55087	10.7631	8.62577	5.16136	4.87416
AHCTF1	21.8628	16.851	12.4609	20.5411	17.8715	23.4745	27.1549	15.7256	21.4338	20.9256	27.4534	27.1695	18.9278	18.1249	41.5816	41.6725	20.4245	28.5129	27.2329	18.4577	22.8857	14.8039	23.0694	21.2915	16.0968	15.7159	25.6842	18.162	26.2198	18.1746	22.4546	20.3659	19.8673	16.3138	22.714	8.20796	18.0709	22.5869
AHCY	59.1446	10.51	20.7075	22.8884	44.1359	55.8416	41.7679	53.3487	4.91743	19.3666	14.9013	16.459	30.6891	8.4344	11.2254	20.395	13.7012	18.3454	15.2954	35.1759	39.3635	30.9856	33.5208	38.1547	86.916	27.5508	82.459	51.2467	64.0361	51.4572	19.5674	45.8935	28.4492	34.7942	35.6451	27.4324	12.6107	24.9029
AHCYL1	42.9317	21.4838	26.0807	15.8753	32.3333	20.8875	39.4609	14.8215	36.5351	23.5496	25.8813	42.3745	33.2881	17.0562	22.8684	18.2387	23.1263	23.9311	28.4303	35.8245	51.9894	35.6579	69.3086	30.2631	40.5335	64.8307	46.234	95.3988	29.628	27.8218	37.2766	44.6148	34.7878	21.987	29.9533	30.0312	23.0818	44.7377
AHCYL2	5.68884	3.25443	2.79159	3.59965	5.6633	3.0985	3.76564	11.7603	3.69799	8.89413	3.08589	3.6056	6.60862	5.08256	0.722468	4.36559	4.11296	2.7129	4.08501	4.92808	4.13013	5.35679	6.00876	6.48861	5.40325	4.07927	6.37978	7.30159	8.29021	7.01187	6.03983	5.92536	6.62933	4.77653	6.61	3.76104	4.25816	4.09812
AHDC1	1.66878	4.24211	4.42795	1.40484	0.771465	6.65033	3.60015	2.98328	1.52755	2.00456	1.6984	2.98905	2.41112	3.01509	3.12931	1.77124	2.50341	2.80238	2.38976	2.79267	1.90783	3.2432	2.09023	1.32641	1.18534	3.20307	1.64115	1.64222	1.42024	2.29617	2.54876	1.96831	2.98551	3.82708	2.32489	3.77453	3.99161	2.73095
AHI1	6.34238	31.9579	14.5996	18.6443	8.61154	11.9396	12.3707	14.7272	30.6522	23.9037	19.8567	24.7655	17.5089	22.7788	17.993	25.7021	27.5937	24.2214	37.0685	12.7768	8.1235	11.9348	10.7204	7.5293	8.81901	10.0797	5.56299	7.01782	8.56118	5.48325	18.3823	7.28898	14.3223	11.1946	28.5892	13.1674	15.8203	18.5157
AHNAK	456.016	0	788.778	767.341	441.488	439.368	676.424	608.84	675.189	525.804	652.045	0	0	758.921	766.629	792.363	670.239	645.648	0	0	401.216	0	0	0	0	0	0	366.038	0	0	0	463.518	0	0	0	527.012	0	0
AHNAK2	35.0284	56.413	27.3456	16.481	14.7737	190.344	12.6296	33.6522	38.0094	24.416	9.76855	4.32185	15.3205	25.4209	28.4331	11.746	27.3853	23.3952	37.4822	43.2486	12.801	45.4728	11.9072	18.1372	6.16343	7.8972	3.11367	1.39787	6.20002	34.6549	89.1464	61.5886	50.9326	44.9449	27.0732	36.8923	34.2891	26.4021
AHR	9.70739	27.907	20.8934	12.6687	20.651	11.1828	10.5575	7.0221	24.6203	19.8711	20.1452	5.84024	12.5362	21.3942	20.5502	14.1194	28.6073	12.9842	29.2478	27.9814	34.5938	22.1896	28.6899	33.9921	17.1055	20.9648	37.5857	11.4268	13.6567	35.5992	27.9713	7.28511	17.8047	8.16586	13.0469	4.05535	22.3363	16.9809
AHRR	0.0519787	0.0421378	0.0158244	0.0649725	0.0217894	0.470436	0.0391703	0.143995	0.411101	0.124113	0.0248696	0.0847994	0.283426	0.061597	0	0.123406	0.291953	0.115878	0.047056	0.155774	0.124748	0.0126607	0.0394829	0.00957312	0.141325	0.0473264	0.0162193	0.0188968	0.00645317	0.0958626	0.155874	0.0772268	0.0596721	0.183986	0.26209	0.35339	0.146508	0.162071
AHSA1	68.1885	23.6925	29.6713	38.2091	63.9992	87.0656	47.5011	43.3331	24.2868	42.2698	43.1067	33.4675	38.1695	26.417	31.0813	68.7744	39.5185	42.1159	58.6494	48.9718	76.8297	45.2293	68.9193	78.9449	132.651	102.454	92.6653	83.3308	109.682	109.769	80.3407	110.869	62.587	46.3757	58.7594	54.7522	35.542	65.3853
AHSA2	3.42239	15.9616	10.2562	6.73537	2.22928	5.29897	8.00796	15.7746	11.9254	13.1181	16.1724	13.4882	10.4552	12.4282	5.03053	7.34615	7.56176	9.48181	11.7928	7.69843	3.59004	8.07654	2.83061	1.78098	1.83272	6.72965	1.54749	1.87135	2.80711	0.979277	10.0608	7.322	11.3452	12.1257	10.5893	20.8524	7.20559	4.74741
AHSG	0	0	0	0	0.0568853	0	0	0	0	0	0	0	0	0	0	0.0120985	0	0	0	0	0.139168	0.145592	0	0.00534066	0.0331889	0.384867	0	0	0.661697	0.0124422	0	0	0	0	0	0	0	0
AHSP	0	0.147302	0	0	0	0	0	0	0	0	0	0	0.0455008	0	0	0	0.16831	0	0	0.589179	0	0	0.463223	0	0	0.165848	0.0230246	0	0.04404	0.137837	0.0247491	0	0	0.151754	0	0	0.130449	0
AICDA	0	0	0.0162831	0.0167644	0	0.0146779	0.257123	0	0.00766303	0	0.0313617	0.00625341	0.00627658	0.00865434	0	0.00652267	0.0225958	0.0356798	0.0121331	0.0114662	0.0016829	0.0192185	0.0026594	0	0.0276692	0.0143374	0.0201948	0.00163563	0	0.0164905	0.00193504	0.0234768	0.055029	0.0088424	0.0190124	0.0291942	0.00675411	0.00405256
AIDA	11.0431	20.5551	11.1452	18.5362	19.7535	21.3115	16.2309	12.8426	20.1521	22.8916	17.8665	20.0806	18.778	17.9689	46.1744	21.1128	18.0409	29.6492	21.871	17.7827	18.6124	14.3228	30.4273	27.879	23.6127	13.8165	20.1133	21.2813	15.4759	18.2305	23.3926	17.3191	20.4843	16.615	14.2045	12.5373	16.7612	26.2638
AIF1	15.278	10.7444	16.8355	17.3134	40.4529	7.00584	16.6005	23.415	32.4244	11.9148	14.979	7.27305	6.38789	18.3351	9.45903	16.1421	27.0658	15.091	15.613	62.9605	21.0579	13.6838	44.7886	24.2089	40.1933	12.5371	21.5886	40.9823	18.49	32.6352	20.6164	20.8877	17.2281	32.0946	18.8884	10.5604	22.0311	14.6758
AIF1L	8.68081	1.31753	0.367141	0.280455	1.04998	2.16074	5.48277	3.44953	0.871218	0.188406	0.330225	0.417408	1.48542	1.06932	0.756429	1.31722	0.931807	0.0492954	2.1372	3.03117	1.03409	1.10207	1.29272	6.7541	2.22909	0.315522	0.101891	0.546067	0.144233	0.66619	0.848386	5.30803	0.988572	0.963549	7.1869	0.301405	0.782378	1.99993
AIFM1	63.1081	14.9041	11.9817	22.9223	70.5217	22.9945	33.677	15.5512	12.6417	20.6429	17.0234	16.4948	25.0528	16.3678	24.8382	25.3003	17.2014	20.7406	21.8271	29.9314	48.544	26.0885	41.886	32.5967	60.347	47.0076	45.8515	55.8408	53.1127	38.9312	30.1492	40.3753	21.6703	25.7774	25.3528	23.7716	23.7014	24.115
AIFM2	3.52414	3.54982	1.81558	0.958776	0.887852	0.959096	1.95503	2.7759	0.340708	1.70207	1.40677	1.68136	1.31891	2.42738	0.160415	1.09727	1.66523	0.383412	2.80224	8.29687	2.28809	1.65181	9.08203	7.92866	1.506	3.28277	2.21563	1.18997	0.712868	2.29687	0.931588	2.54276	1.86631	3.41096	1.88143	1.05293	1.12768	1.33307
AIFM3	0.663555	0.541994	0.404417	0.403944	0.133924	0.203106	0.863442	0.662968	0.911096	1.19167	0.969259	0.723636	0.269795	0.708292	0	1.32207	0.308636	0.514083	0.283305	0.395043	0.36605	0.523569	1.26477	0.590082	0.206833	0.196961	0.327337	0.689646	0.246571	0.171576	0.375835	0.846813	0.820993	1.89364	1.35364	2.0962	0.215666	0.281923
AIG1	5.51038	8.64054	5.42015	6.68028	12.1738	3.73856	3.7982	5.71963	5.33869	4.65147	5.5683	3.48535	8.14201	2.93886	6.43214	13.807	6.98652	4.67605	8.00555	13.9766	5.33378	11.8127	19.342	14.2691	11.8621	14.2881	4.76753	18.0763	28.9704	10.1867	7.22197	2.98237	5.68023	7.1902	5.33902	4.10992	4.68325	7.58987
AIM1	4.55483	7.07617	7.94535	7.50399	5.6427	8.39402	16.6423	11.1893	6.96958	8.08531	6.2316	8.13153	5.4724	7.94071	7.1409	17.4464	7.94738	13.608	14.2298	10.1282	10.1388	10.1685	8.39856	8.30983	14.2036	6.70981	1.14618	6.30537	23.6861	7.6298	16.4088	6.16701	8.09884	7.75542	9.72938	0.517693	19.8863	10.6199
AIM1L	0.392149	0.0312387	0.105917	0.215691	0.0726326	0.118284	0.0873692	0.557056	0.0240025	0.339548	0.0325457	0.0713543	0.380143	0.189659	0	0.0711512	0.039076	0.145288	0.0566908	0.0324892	0.186285	0.0888163	0.0600528	0.313574	0.0647493	0.0169004	0.0178722	0.075919	0.210446	0.0984427	0.339852	0.150324	0.12116	0.0662669	0.422691	2.13529	0.194296	0.16448
AIM2	0.533437	0.304184	2.10205	1.44957	1.88472	0.0724528	0.342861	0	0.960401	2.55316	1.57132	0.235754	0.532976	0.97262	0.512733	1.17413	1.3144	0.52029	1.51373	0.449864	0.202774	0.730027	0.458476	0.3538	1.45964	0.131589	1.11547	0.577899	0.593796	0.18622	0.381633	0.783417	0.483815	1.58208	1.00169	0	1.04919	0.401702
AIMP1	28.6858	11.8908	8.10381	12.1532	15.9141	15.3394	22.0186	11.2572	6.04503	6.43073	15.6352	16.3943	14.564	15.459	13.9717	13.8358	10.1859	15.8439	13.234	11.3038	13.6069	13.1404	26.7261	12.9073	14.4415	13.9011	12.6554	14.4621	12.3425	15.2303	14.0152	27.3875	13.9399	11.6325	20.5523	12.6008	9.17497	16.4721
AIMP2	17.9368	2.57256	2.47603	4.94691	5.24979	9.10268	11.0303	8.25886	2.029	3.99061	6.27127	4.07458	5.40371	4.35112	1.05471	5.09898	3.85933	1.50772	5.08756	4.61961	14.2984	4.62445	6.81718	7.07518	12.3404	9.53463	11.5951	12.0669	8.97905	11.445	7.28601	8.16444	5.18982	4.55279	6.11439	3.69356	5.93625	5.52801
AIP	19.9723	12.7135	13.1292	14.1407	18.178	14.5923	57.6405	26.2883	10.8817	8.6164	10.3749	13.6862	13.3362	11.3508	10.8856	11.6864	10.5816	7.52524	13.1206	20.935	21.0356	26.1263	24.0072	19.8034	25.7767	21.4953	25.8948	19.0307	20.1599	32.2942	14.4481	19.1748	18.4709	22.2214	26.5485	11.599	14.5084	14.0339
AIPL1	0	0.00223367	0.00933254	0.0201815	0.0151555	0.0128828	0	0.0293622	0	0	0.000952437	0.0389256	0.0125921	0.00868054	0	0.00654214	0	0.00681626	0.0131852	0	0.000843571	0.00120462	0	0	0.000840723	0	0.0057881	0	0.00269217	0.00330817	0.0115687	0.0129843	0.010191	0.00633541	0.00577899	0.042501	0.0175068	0.0229448
AIRE	0.0113349	0	0	0	0	0	0.0487247	0	0	0.0824272	0.00715586	0.0235485	0.00913734	0	0	0.0585889	0.0659215	0	0.0176873	0.00420947	0.00987714	0	0	0	0.00369624	0	0	0	0.00394072	0	0.00967887	0	0	0	0.00502815	0	0.0459146	0.0145374
AJAP1	4.35958	0.708301	0.00776488	0.0184729	0.125543	0.19174	0.0128911	0.031236	0.315112	0	0.951888	0.335991	0.63871	0.680311	2.3964	0.249069	0.394222	0.116552	0.208785	0.698679	0.111799	0.236851	0.131191	0.172911	0.198317	0.0622441	0.179449	0.131279	0.323364	0.141559	0.100528	0.124081	0.290814	0.558874	0.228017	0	0.229097	0.116699
AJUBA	1.3317	1.14155	3.05501	1.27671	0.764909	2.17062	2.58521	1.96181	0.463075	1.23274	1.17407	0.829437	1.05028	0.450244	0.450961	1.57696	1.07331	2.22004	1.84065	1.55689	2.16643	1.70615	0.620217	1.91814	2.43131	2.62666	1.10209	1.14404	0.861281	5.17307	2.63894	0.716055	1.56479	0.633636	0.417281	1.27699	1.84289	2.016
AK1	15.5124	8.61477	4.55103	6.78805	7.54152	18.0937	7.34634	11.0884	3.86603	7.15679	5.33073	5.29926	6.75024	10.4383	1.26152	6.48435	8.78672	3.87539	6.60608	11.3904	8.07215	12.2093	18.8976	11.1221	16.4592	15.8782	27.7081	13.6903	5.77634	24.4731	9.26785	7.61439	12.3054	10.5127	7.82881	10.7968	7.19853	8.2706
AK2	92.697	81.4589	87.5156	62.0113	58.9705	120.773	91.3779	76.1507	156.298	121.568	113.809	127.522	134.802	102.574	204.879	98.7665	83.3456	161.901	113.027	67.9191	83.7183	71.5364	81.3341	61.6739	0	0	110.721	134.649	54.1869	62.1412	116.685	119.968	118.523	70.983	84.4048	52.2853	109.57	118.46
AK3	3.63724	6.94729	4.51282	3.57495	4.96317	2.716	2.42449	3.27428	2.96169	3.8889	8.1699	4.20611	5.56582	5.97342	6.43145	7.49985	6.70184	5.32075	9.43129	8.47841	7.80694	7.54241	9.33231	8.46006	4.358	6.52601	10.0053	3.59097	10.5708	6.88525	6.52262	4.11832	5.27934	3.78751	9.48486	4.50339	6.34152	6.26303
AK4	0.436604	1.08857	0.628976	0.500263	1.42694	0.964282	1.48557	0.726999	0.439725	0.384797	0.826318	0.500731	1.44626	0.627531	0.238615	0.832837	0.88623	0.580075	1.39238	1.33076	0.923317	1.18244	1.32237	2.77628	2.64548	1.5837	0.47022	3.15544	2.69607	1.79954	0.800961	0.515113	1.14056	0.422485	1.0223	0.228964	0.900465	1.18799
AK5	0.482393	6.4489	2.20559	0.256851	2.96132	1.26592	0.274082	0.996015	2.6218	3.97118	0.807207	1.07912	1.30753	1.4345	1.36157	1.33667	6.04947	2.28541	11.6599	8.27107	4.8886	10.2074	0.547105	0.972798	0.158756	2.93074	36.9514	0.568119	18.6139	10.2422	3.93593	0.186644	4.42703	4.04493	1.4748	5.33666	14.4956	1.58802
AK7	0.123957	0.417796	1.7832	0.0922735	1.42968	0.186387	3.78934	2.70785	0.0486304	2.24973	0.983785	0.377302	0.325457	0.750636	0.621637	0.262317	0.597931	0.416974	0.385247	0.941401	1.29063	1.25518	0.806135	1.3455	0.8448	1.99166	6.86273	3.14628	0.941144	3.73554	0.638211	0.378352	0.326957	0.254482	0.442577	0.0926262	0.248388	0.654573
AK8	2.3413	1.00222	0.560137	1.35089	0.232682	1.06994	1.50072	1.5257	2.36182	1.35714	2.39734	2.06335	0.796477	0.699119	1.29738	0.458157	0.661907	0.201406	0.65583	0.627194	1.81469	3.56069	3.3888	2.192	1.64873	4.90078	9.63402	8.15121	2.70976	2.45815	1.45771	0.921041	0.999265	0.873102	0.713528	1.05246	1.12451	1.27606
AKAP1	21.5286	14.8946	10.2174	11.9466	11.1296	31.0799	51.6037	16.3158	30.7897	20.4341	12.3594	18.1517	19.5986	27.8812	20.5562	11.2827	9.19611	19.9978	27.6481	17.379	11.5411	9.75602	9.22777	18.0034	36.8621	20.0714	14.9571	20.3864	16.404	9.42168	12.4291	42.658	21.8946	19.7347	31.094	20.4787	14.7916	14.8075
AKAP10	9.66339	12.6055	8.6485	7.83282	10.2457	7.55674	6.92717	6.91826	14.6916	12.1587	13.8123	5.45175	12.2155	10.1307	24.7735	10.377	10.699	14.2463	11.146	9.2143	5.5535	8.47676	5.69737	8.05105	5.70515	9.28078	9.58211	5.55345	16.076	6.01376	7.71134	6.94804	8.40229	7.56617	7.66298	3.83671	6.64697	9.10228
AKAP11	8.83236	11.3357	4.88313	5.69218	5.92843	6.80185	5.86784	4.47927	11.3024	9.69443	12.3777	8.66149	13.826	8.59616	18.7514	12.1376	9.57224	12.0859	11.1184	8.59179	5.37493	8.19425	7.49832	8.15882	4.13499	10.7333	3.21852	4.04301	24.7361	7.24816	7.47364	6.22274	6.02801	4.21943	4.81956	1.43988	4.89624	9.52953
AKAP12	2.65173	17.4154	5.07232	2.16407	2.66865	4.34084	2.29726	2.31271	10.3492	6.74762	4.14477	2.19833	5.45633	10.1079	9.43865	4.7474	12.8895	6.04642	25.2281	17.6845	4.60149	10.6447	17.4365	13.3652	3.03302	1.17074	1.05231	0.366381	3.13742	5.81968	5.85598	4.31316	13.0143	16.0104	9.26352	1.55049	8.00469	8.83837
AKAP13	10.1759	22.2963	13.3392	10.9215	9.70126	16.9085	12.9586	16.0339	25.261	22.3567	21.0427	16.482	14.2745	28.5894	27.3149	17.6071	24.6294	25.816	28.1155	17.2317	16.8701	24.8718	18.6344	15.8315	10.2728	11.1832	15.006	6.44215	35.7107	12.6288	20.7295	16.1986	22.5891	30.8615	18.9159	0	19.0503	16.9912
AKAP14	0	0	1.61216	0.171522	0	0	0	0	1.10281	0	0.115973	0.0975202	0	0	0.0405704	0	0.179596	0	0.0946548	0.0542101	1.16818	0.0235615	0.0526285	0.10896	0.0100988	0.200054	0.16039	0.0129917	0	1.16954	0.0275435	0.122564	0	0.035712	0	0	0	0.343531
AKAP17A	12.8907	12.4485	11.1672	11.9825	6.33136	17.9167	13.0286	27.5154	15.8882	14.7365	14.0644	14.1015	15.98	18.2059	5.51865	10.3417	11.7819	8.74421	13.6168	14.3183	16.2914	11.3797	8.95014	5.86899	10.8189	8.27678	6.85389	4.86234	9.54586	5.41851	10.2682	18.4519	14.7054	24.8352	16.0221	9.17499	11.2513	6.70499
AKAP2	1.08574	0.632895	1.91714	0.564443	0.570585	0.955554	0.671006	1.81855	2.46434	1.60043	1.52308	0.752365	1.14165	3.3898	6.35398	2.41664	1.88293	0.447638	1.17792	1.74157	0.630835	1.11823	1.30773	1.0043	0.692326	0.214837	0.336787	0.197933	0.904962	0.653259	0.452249	0.578688	0.867877	2.27825	1.99303	1.43522	1.15405	0.359345
AKAP3	0.0704117	0.0554207	0.540276	0.129726	0.0417007	0.229946	0.340087	0	0.770246	0.111068	0.0735421	0.587568	0.0404882	0.0585197	1.13625	0.01803	0.124894	0.307027	0.290639	0.218926	0.0681455	0.247441	0.110048	0.219672	0.305485	0.0527793	0.196509	0.710499	0.0864421	0.139575	0.131399	0.29626	0.18337	0.0228198	0.01593	0	0.091287	0.119484
AKAP4	0	0	0.103842	0	0	0	0	0	0	0	0.0223726	0	0	0.00565693	0	0	0	0.00666354	0.0178509	0	0	0	0	0	0	0	0	0	0.00526291	0.00970182	0	0	0.0163957	0	0.00338914	0	0	0
AKAP5	0.432231	0.524736	0.687458	0.342618	0.281123	0.135932	0.265285	1.33083	0.639256	0.286064	0.318754	2.21238	0.788225	0.453852	2.20903	1.80291	0.56077	1.19158	0.563679	0.181682	0.585289	0.196435	0.132469	0.520617	0.451635	1.36295	1.02509	0.288543	0.190968	1.05573	0.555641	0.3259	0.231732	0.249761	0.677345	0.699378	1.10316	1.09027
AKAP6	0.370564	1.79565	0.709558	0.342775	0.378071	0.750889	3.13418	0.687929	1.95954	0.496879	0.440266	0.371973	0.549456	1.49392	0.586058	0.374555	1.23868	0.383708	1.75915	1.90352	0.178195	0.430384	0.293732	0.570551	0.495441	0.0282929	0.238754	0.134736	0.352448	2.13435	0.490636	0.308107	0.856509	0.581958	0.878137	0.292562	0.724618	0.538198
AKAP7	0.854292	3.29132	2.2507	1.28062	2.55895	1.68846	1.33831	0.432319	2.33759	1.35501	1.73388	1.36588	1.41897	1.52133	3.63716	2.50575	2.58151	2.25354	3.52042	2.86074	0.790373	1.85002	2.50807	2.25968	1.82359	1.92941	1.93605	1.20153	1.23484	1.20956	1.93499	0.857771	1.98251	1.03827	1.57094	0	1.74358	2.55747
AKAP8	6.7451	7.09585	6.39683	7.29381	5.58842	17.4691	18.6137	11.5976	9.88577	14.2668	8.69523	9.46096	9.06566	12.7013	9.4651	6.61057	7.69565	12.6902	11.0216	8.47774	9.75972	8.08697	9.07183	8.35687	13.3436	9.23697	8.27799	6.88085	8.15745	5.96015	8.0946	7.8503	14.5579	17.7787	11.3484	15.0975	11.1467	7.56478
AKAP8L	30.3046	37.3764	28.5172	40.9213	17.5081	52.4611	56.2663	67.3339	37.2988	68.7301	45.4597	27.0341	48.4009	39.6899	34.6366	39.9785	34.2991	57.12	41.9902	34.6452	38.2555	39.6795	28.4149	30.7241	63.8099	71.7638	33.8994	30.0278	25.9221	21.8748	34.6663	35.4914	48.8486	63.9921	63.303	62.0033	41.0727	25.6804
AKAP9	39.3836	59.289	37.5522	45.0889	34.1712	25.9635	53.7701	32.3307	101.237	151.15	36.358	76.4355	50.9294	44.3607	181.557	97.5494	62.8485	85.8608	77.1996	28.7201	52.1945	53.2656	46.4182	32.3201	55.0554	82.4592	52.6345	69.193	39.1416	44.9063	52.1012	53.8308	38.1599	22.8761	54.8283	23.2774	55.036	65.608
AKD1	1.68268	3.91685	5.49279	4.35371	1.98899	1.12022	2.93404	0.589539	5.6294	3.09844	3.54601	6.834	2.36908	3.87552	4.53707	2.52156	4.64986	2.90354	5.72022	3.27695	3.15795	3.36498	3.71221	4.58814	3.83133	5.36623	2.21133	6.07825	2.95605	4.43717	3.70476	1.37732	2.93812	1.3847	2.52838	1.74722	2.38647	4.50282
AKIP1	8.28456	1.45428	3.05358	3.38203	3.40055	1.80351	2.11913	0.57335	4.23204	3.42883	2.82725	2.9061	2.25135	1.8323	1.75547	2.72189	2.98913	1.09945	2.11027	3.12832	5.79009	3.42967	5.39009	4.4239	4.32743	4.57285	5.87362	4.50858	5.82106	5.85393	2.81368	4.76783	2.51905	2.78701	2.03912	3.48668	1.52952	1.7518
AKIRIN1	7.54865	5.87857	5.35569	3.69572	4.78853	5.54481	5.36179	4.01568	6.68334	6.16081	4.88674	3.65223	6.33025	6.28121	5.38515	5.1389	6.33246	3.41945	5.86447	4.45295	3.85182	3.03773	8.97074	6.01835	6.86694	6.20745	5.01526	6.21083	3.53174	5.81248	4.20365	5.68029	3.56625	1.56805	4.3463	0.757927	4.1876	4.72504
AKIRIN2	3.96603	3.63641	3.67415	4.25964	2.66461	8.34707	1.79414	6.16204	1.9214	3.45865	3.95995	3.55556	2.98399	4.39312	7.11117	6.27483	5.14202	3.28168	7.44078	6.62404	3.61383	4.853	7.09928	9.96783	7.47959	8.03704	8.33082	8.25916	8.12635	6.35147	6.7258	5.01931	5.58849	3.67444	5.31981	2.11692	5.32157	8.10317
AKIRIN2-AS1	0	0.0592634	0	0	0	0	0	0	0.125268	0	0	0	0	0	0	0	0	0	0	0	0	0	0	0	0.0520473	0	0.0283797	0	0	0	0.0299862	0	0	0	0	0	0.0784498	0.0885302
AKNA	3.33404	7.69751	6.53299	4.10187	4.13092	4.35275	5.9383	7.32681	5.5224	8.10456	6.90448	3.95613	4.56286	13.7202	3.43442	4.88969	7.5854	5.33908	7.28276	7.7881	2.50728	3.23442	2.8923	4.12963	4.61744	3.59926	5.27461	1.35449	3.65682	2.27753	4.24436	5.3756	6.50537	15.8658	5.76772	5.37443	8.30791	4.50828
AKNAD1	0.0082027	0.237839	0.178361	0.146825	0.0275281	0.214337	0.23884	0.45698	0.818879	0.440007	0.0260112	0.159733	0.143208	0	0.00745279	0.208321	0.123686	0.086882	0.276763	0.104473	0.0092017	0.140001	0.0774844	0.0647393	0.0183326	0.037331	0.247184	0.0894347	0.0220103	0.0330489	0.0756563	0.108793	0.127512	0.103317	0.107282	0	0.139721	0.168395
AKR1A1	47.4881	25.2567	24.2599	20.6793	65.2252	22.9201	55.7401	28.4078	23.3229	13.6453	14.0624	21.8708	25.9812	17.6761	15.864	21.6315	25.6462	17.6126	15.4108	51.3093	42.3141	45.7404	66.5766	33.8016	65.9721	40.2736	88.8085	132.833	36.7359	73.3467	34.0951	39.162	29.2783	25.8783	30.1317	39.0943	21.1166	24.9003
AKR1B1	24.781	38.2456	28.9642	26.4851	55.8234	27.0916	19.9477	20.2675	35.6304	17.67	12.4464	10.0152	17.5724	33.7972	9.03114	16.7247	33.4666	11.3786	24.3961	153.256	23.7123	38.5424	29.7717	42.373	36.9454	13.3072	26.905	20.2455	42.5583	46.7412	24.8021	21.1864	25.9351	54.9201	21.5802	7.89308	27.8804	23.0448
AKR1B10	0.0915572	1.25702	3.18551	0.0736055	3.28269	1.01659	25.486	3.74003	0.0416098	0.0128849	0.0729995	0.640923	0.18306	0.203805	0	0.285764	0.599359	0.0123259	0.221693	0.291952	1.0672	0.872507	0.629664	0.144475	0.0373083	0.121151	0.468426	0.86461	0.186322	1.05245	0.212432	0.111785	0.0385123	0.0386132	0.204483	0.0422188	0.361131	0.35524
AKR1B15	0	0	0.857152	0.396862	0.0182747	3.73777	1.49651	0.0709194	1.78202	0.0126348	0.0920103	0.0336587	0	0.00512509	0	0.408575	1.23591	0	0.0978036	0.442083	0.0823157	0.77577	1.18981	0.115827	0.109658	0.0593565	0.00521631	0	0.396764	0.527543	0.0535499	0	0.20392	0.00631036	1.01177	0	0.193134	0.142882
AKR1C1	1.49322	24.6447	6.4297	3.26191	4.46015	10.3674	89.5283	1.20784	9.47968	11.043	6.42185	3.07	12.0567	15.6384	0.617267	7.48738	15.7103	1.67456	31.8888	78.9758	5.58044	5.53407	97.5079	47.5956	2.26978	0.85995	5.89704	3.90809	2.584	11.3699	8.19672	2.96947	14.3329	12.5506	5.09988	0.587264	8.32389	3.4977
AKR1C2	0.623403	22.7193	2.48812	1.2922	1.50825	6.16316	147.352	2.19968	4.59703	5.54857	2.10865	2.02819	8.02137	6.39386	0.79314	3.92058	6.42579	2.02787	10.5372	46.764	2.63941	3.03329	60.7297	23.5895	1.71748	0.414122	5.92704	2.47184	2.89306	5.84954	3.56986	1.44672	6.0402	7.68951	3.25113	0.653029	4.13895	1.66537
AKR1C3	7.20452	56.5842	10.3834	12.985	18.8478	22.9646	207.287	4.9645	8.39032	19.4966	8.72011	7.02196	17.402	19.3974	3.02591	14.841	31.9774	7.60804	23.368	162.638	13.8588	30.059	193.594	87.0567	8.77945	4.88306	96.2987	40.1842	19.861	26.7935	12.9305	6.77247	19.8481	31.2363	16.3811	0.0143784	17.1975	8.1414
AKR1C4	0.0248839	1.4456	0	0.071531	1.44333	0.453312	8.77593	0.0285137	0.0381644	0.307803	0.416759	0.10014	0.442337	0.216799	0	0.467219	0.976763	0.016987	0.0735337	4.33167	0.676833	1.16952	5.46042	1.70594	0.211997	0.128342	1.5209	0.571793	0.680645	0.544367	0.257319	0.0406084	0.841304	0.808636	0.554626	0	0.374568	0.492517
AKR1CL1	0	0.160799	0.0543365	0	0.00676941	0.0588128	0.071564	0.333797	0	0.0851107	0.0762657	0.00836639	0.150905	0.576504	0	0.148195	0.342548	0.0181177	0.218994	0.188816	0.0135648	0.216872	0.0932017	0.040083	0.0169149	0.00550262	0.0735773	0.0922755	0.0252528	0.00887382	0.0665633	0.0675057	0.0564991	0.118019	0.650632	0	0.102241	0.04667
AKR1D1	0	0.0398708	0.00440867	0.0145468	0.0860878	0.00795469	0.218164	0	0.0166052	0.00383771	0.00205826	0	0.0803748	0	0.00884212	0.0129673	0.031117	0.00367887	0.0164521	0.00622611	0.0332614	0.0261109	0	0.017617	0.00268718	0.0338611	0.00616256	0.0777405	0.402146	0.0319899	0.0513441	0.0176234	0.00458734	0.0383521	0.218542	0.689674	0.0125473	0.0883058
AKR1E2	0.710272	4.37855	0.249996	2.95849	1.97098	4.19518	9.49095	5.72212	4.1991	2.53219	0.683082	1.57883	5.39386	5.84069	2.49799	1.45352	2.01011	0.440443	2.91529	4.67185	4.03203	2.93434	3.08418	1.88711	0.97635	1.08945	0.866254	2.45379	0.640906	2.81099	1.45169	1.86003	1.6513	1.04116	1.1303	1.01627	1.25448	1.12098
AKR7A2	30.8151	19.0869	28.547	13.7026	28.3528	23.4829	20.3292	33.5849	6.96915	13.4319	16.2512	24.2578	32.4455	19.835	14.1589	13.9785	17.2333	12.7104	16.7243	28.4296	34.087	39.1138	35.8858	25.002	26.2825	41.3401	66.0266	71.5183	26.7341	45.7652	18.0889	25.1907	28.4374	20.2425	18.5903	44.9657	16.4198	21.3601
AKR7A2P1	0.126248	0.700992	0.709995	1.6484	0.32375	0.64148	0.964514	4.63545	0	0.458871	0.628599	0.416759	0.806673	0	0.0363182	0.549488	0.369197	1.75381	0.55956	0.752418	0.211978	0.109333	0.133445	0.0711208	0.175969	0.225086	0.430075	0.159755	0.0318205	0.0474593	0.334526	0.220694	1.60529	0.276735	0.18478	11.1671	0.968925	0.794179
AKR7A3	17.9412	8.59687	16.9631	4.58108	36.8225	1.60075	61.5002	2.73371	4.34358	13.1957	39.4422	46.8334	33.773	25.2938	24.0406	17.5313	4.55017	4.53425	5.20838	3.77268	8.25989	25.2623	8.3049	7.86831	29.7675	18.701	195.099	150.82	1.40975	8.13282	11.9817	11.8302	29.7403	23.612	19.7426	21.3615	3.3882	13.497
AKR7L	1.11486	1.15818	0.837835	0.822816	0.294064	0.635691	3.86135	1.56779	0.943058	1.92314	2.09194	5.20557	2.43788	2.128	0.51454	1.29141	0.924417	1.02878	1.51587	0.579795	0.543405	1.39899	0.207513	0.350571	0.641564	0.806099	3.55627	0.69134	0.101398	0.302203	1.16294	1.17975	2.99428	2.28413	2.28952	6.69953	0.645043	0.813214
AKT1	44.9615	23.4655	33.5851	32.069	49.857	43.6764	58.3724	123.175	25.3718	48.6175	37.2047	47.7005	43.4706	36.8339	18.6905	58.4128	29.3933	24.3786	24.3276	42.8155	75.921	40.6097	32.863	38.4885	31.8283	46.7466	65.4885	32.6607	42.3672	87.2631	33.6835	58.8872	35.5234	85.6386	37.4107	75.6432	38.958	36.0995
AKT1S1	6.9478	2.98867	3.183	3.65866	2.50805	4.75727	2.58554	1.9902	2.05508	5.97413	2.70193	2.91396	3.74151	2.98459	5.38842	2.46035	2.57889	4.06871	1.52012	2.47324	5.28307	3.27197	2.94004	2.92056	2.9799	3.5951	4.39779	4.48488	2.59805	3.00765	2.07485	3.44031	2.54053	9.59459	2.73113	2.66621	2.58856	2.32891
AKT2	40.8426	26.263	15.9369	18.8447	32.8115	29.3996	18.7675	13.9982	17.1794	21.5621	32.9947	20.9955	41.4943	21.7792	17.7391	17.9039	19.6871	27.5074	30.1328	39.8746	34.1774	29.6293	40.8838	27.2784	28.8735	47.2588	54.2537	36.3101	32.809	25.7566	24.1505	29.2322	30.2762	27.385	33.8868	28.281	21.2717	23.1607
AKT3	6.40244	38.3887	12.5662	9.16088	14.4355	26.2053	5.67247	9.92536	37.3649	14.2197	10.8999	6.57758	13.8026	23.94	68.5497	16.4422	35.3956	27.7947	82.2054	48.021	10.8816	31.41	19.748	20.9105	10.9853	4.61683	3.35285	2.64298	6.53948	14.7619	24.4895	10.4934	26.9898	16.3071	19.4547	1.83926	16.538	19.9053
AKTIP	10.642	10.7784	5.55395	9.02289	5.30255	11.7619	7.16149	12.2861	4.63459	8.6597	8.76823	6.37275	8.27422	10.5764	15.8233	5.41622	8.40552	11.6202	12.3065	8.45788	10.6857	10.3276	11.4558	10.1455	13.2122	10.5517	13.2296	11.7031	13.8633	12.775	7.32904	9.58304	6.79968	4.88565	7.02858	2.7243	11.0189	9.62578
ALAD	12.216	5.29709	7.17361	4.97433	9.15647	6.98978	6.65543	8.71579	0.702534	2.72116	6.15862	5.52144	9.09811	9.08152	1.7596	7.1834	5.50843	4.49093	3.78697	13.9841	7.07386	12.9171	10.8684	6.68199	4.52501	10.3386	7.45152	11.4861	12.8144	11.5924	5.90436	4.75124	6.36284	5.51411	5.17025	6.75116	5.24274	4.04012
ALAS1	21.4204	6.82109	8.63892	10.0109	14.9445	13.9553	9.63805	10.7781	5.96974	9.50113	10.0297	6.52781	11.1444	8.29784	12.998	13.3036	7.68519	8.64657	8.96531	17.7571	11.4589	16.8092	18.2446	17.5817	15.845	14.8257	16.0846	26.4847	12.738	12.9294	11.8237	7.27465	12.4666	8.89709	6.4226	9.28931	10.2156	6.38289
ALAS2	0.0407044	0.0899807	0.109389	0.0377932	0.0142758	0.0413737	0.230023	0.110263	1.16309	0.0845961	0.0642651	0.0936755	0.018758	0.0515364	0.194565	0.185358	0.0742855	0.101251	0.245124	0.217826	0.030435	0.0145456	0.246971	0.0242003	0.0161379	0.0522108	0.00434201	0.0197165	0.0114113	0.0498091	0.0447146	0.0593269	0.145337	0.0633566	0.113545	0	0.405401	0.116583
ALB	0.0626443	0.446426	0.204998	8.32945	0.611954	0.508418	0.430386	0	0.394867	0.553064	0.13661	0.228721	0.988264	1.24754	0	2.15358	3.85619	2.41878	1.43769	0.18869	2.07815	48.9173	0.0640967	1.34465	1.97171	3.1458	1.2731	1.70507	52.1124	1.77122	0.112951	3.21524	1.39087	0.173653	2.26315	0.542812	5.56392	0.773221
ALCAM	35.4784	22.5713	28.5143	15.6284	55.4078	5.40201	59.1096	8.51837	23.7388	17.6205	31.2725	42.2878	44.4731	19.8183	23.9131	49.3708	27.1253	22.5393	16.6841	11.2117	31.6986	36.6615	88.0914	33.128	120.272	46.3853	86.4698	76.8836	14.4886	63.6825	36.1483	8.49116	22.3351	12.3658	23.5448	14.7138	41.0701	41.9769
ALDH16A1	6.29132	3.12151	2.57948	4.50421	5.00491	5.97037	3.70022	6.18144	1.59858	6.2913	2.04537	1.74492	3.46143	5.35075	1.98738	2.96462	2.2905	4.34229	1.39646	4.87753	5.40796	4.33734	2.70348	2.76305	2.86692	1.87055	3.58285	2.26711	2.54358	3.635	2.47619	3.50158	3.59914	16.4825	1.6794	18.8203	3.22781	1.94544
ALDH18A1	41.9267	17.5076	21.139	30.3022	103.372	32.396	42.4316	22.5437	15.5419	26.4599	24.5207	36.2381	33.9075	35.3761	23.42	40.9827	28.973	23.929	17.6904	26.9547	59.1232	51.5888	51.1262	28.1509	57.3258	35.4389	64.2041	63.9517	63.2782	89.3525	41.8372	30.4821	42.3969	26.4475	27.1441	42.8179	24.1537	34.3966
ALDH1A1	4.80143	50.2971	8.37236	4.49096	10.8498	6.43996	3.30353	5.10895	26.3802	10.104	3.30556	5.17219	12.204	11.2156	13.7642	8.70122	34.4119	5.57694	44.1947	72.9774	7.61111	19.2452	14.3548	25.0312	6.97257	2.31447	3.97173	2.66098	10.946	12.2981	6.83103	6.01466	16.6861	18.177	13.7013	0.10408	10.4741	11.8649
ALDH1A2	0.361429	3.76	0.754039	0.287503	1.83646	0.151217	0.00580731	0.311289	2.41272	1.12906	0.52068	0.550509	1.56091	2.77972	4.6917	0.369766	1.40366	0.264237	3.29171	4.98866	0.626246	1.71549	1.34	1.74951	0.797744	0.168864	0.0312292	0.0849062	7.87943	1.5795	0.50573	0.466728	4.10717	4.10555	3.84922	0.0139094	3.14209	4.51843
ALDH1A3	1.24514	2.39918	3.81432	1.38325	3.7255	3.7679	5.27393	2.99927	3.74086	1.96379	4.58353	0.65725	1.39023	2.72907	0.859787	2.32622	4.36937	1.85176	8.12455	4.37044	3.26062	4.26601	4.66913	4.03631	1.73368	0.513429	1.72006	2.00109	0.507593	7.97675	2.13398	1.72054	4.2847	4.79508	3.4769	2.68465	2.60734	2.18483
ALDH1B1	5.20969	1.86419	3.37575	3.54581	2.60886	5.32483	1.7384	3.30379	2.10489	1.01151	2.36467	0.464262	1.24508	2.02394	0.613962	1.89623	3.43029	1.13335	1.72224	3.98372	2.34072	5.71332	3.49842	5.29128	2.30362	2.31169	2.11639	1.57389	3.90976	6.42205	4.49614	3.25895	3.32497	4.15297	1.4599	3.27163	4.7169	2.51143
ALDH1L1	0.0878661	5.1507	0.292932	0.0476743	0.254657	0.404566	0.101435	4.45237	0.0954773	0.668253	0.1875	0.277848	1.02682	0.831725	0	0.289913	0.763062	0.931183	4.82593	6.66094	0.418168	0.743299	3.28861	8.96234	0.209751	0.0218121	0.0051218	0.0377405	0.238146	0.731371	0.495242	0.273006	4.51364	1.99741	0.676302	0.0103945	0.700604	0.292615
ALDH1L2	1.06968	6.16196	4.27291	3.79056	1.20084	4.20611	3.19878	2.83752	3.77282	2.38833	2.04209	0.480746	1.20442	3.61338	3.13293	3.40562	5.73194	3.00537	3.77397	2.00322	1.06881	7.89356	3.10007	4.11604	2.79648	0.955141	0.517847	0.231154	0.540858	4.82819	6.59594	1.36187	6.00134	3.76629	2.53049	0.577138	3.61079	3.30165
ALDH2	34.0604	54.7542	20.703	6.67585	33.8887	4.38226	15.6514	15.4163	17.2411	19.2943	8.28317	5.22218	12.8581	22.0138	3.77076	20.2523	26.1214	14.8364	41.0996	119.462	11.6521	32.7158	81.2248	104.807	20.2718	37.3996	14.1353	27.653	11.0868	39.5913	25.6771	14.1459	41.8783	35.5296	10.974	9.20045	21.3836	12.6694
ALDH3A1	0	0.413275	0	0	0.0496634	0.083436	0.70654	0	0.383972	0	0.0185558	0	0.0917709	0.0652897	0.0527927	0.0105972	0.282268	0	0.306168	0.799552	0.210096	0.277793	0.145072	0.0793432	0.0165432	0.17492	0.506327	0.112812	0.119151	0.0869	0.432519	0.0292961	0.130515	0.0688658	0.0841569	0	0.051196	0.0973838
ALDH3A2	8.42617	26.0929	19.1622	11.6506	16.4395	14.7591	26.7048	10.2105	25.4184	15.1263	12.1699	12.1314	16.2014	15.9089	35.4268	11.9316	14.3387	20.2539	24.2539	26.5778	10.4805	10.8321	31.1059	19.5066	11.9923	63.0157	48.3103	26.9994	30.0849	17.6777	28.2138	10.227	15.9464	9.24244	14.6536	9.30721	8.83974	22.2495
ALDH3B1	5.55765	1.43483	1.40687	2.04784	2.42436	1.81306	17.483	4.45567	3.18582	1.86008	1.9658	0.640675	2.03578	2.51893	0.405271	0.978252	2.06989	1.92029	0.552434	4.055	1.05621	2.51559	2.4958	2.41883	3.31366	2.83917	4.3571	1.03183	9.05185	4.24777	1.61592	1.62332	1.39133	3.32662	1.03978	1.71486	2.30337	1.53156
ALDH3B2	69.3263	10.1862	15.8514	22.1412	19.792	5.22087	4.04353	54.5572	0	2.97948	25.9932	5.95625	48.194	6.86898	1.98609	26.9348	11.6827	7.25803	2.87373	0.991353	11.9263	27.2667	4.23443	26.7247	58.6814	2.99909	28.6987	12.1269	2.12627	31.8458	4.88719	10.4063	5.93687	15.5411	10.6515	8.79659	41.4863	41.7685
ALDH4A1	6.0812	2.08451	3.30388	1.92553	7.06282	1.62455	3.62908	6.98022	0.437013	1.82094	0.624819	1.26639	4.54904	2.53696	0.0969039	2.06784	2.03806	2.90023	2.10961	12.3393	5.26667	5.31609	5.61229	5.96941	10.1361	4.75702	5.21982	5.84891	2.53205	7.2474	2.3839	5.44787	3.6611	5.36316	3.72319	2.1639	3.54259	2.23459
ALDH5A1	5.11001	1.44762	2.85134	2.90377	1.08462	1.59817	2.01417	4.78306	0.403949	0.798385	3.02034	3.30741	4.3939	3.92265	0.661558	2.06375	1.63213	0.444493	2.87023	3.86929	5.53489	1.52134	1.42622	3.06267	2.85531	1.25822	6.91193	0.281332	5.1716	1.00801	1.57386	3.20776	1.79035	6.03071	3.80531	2.17903	1.94452	2.97725
ALDH6A1	11.6665	29.2338	14.4706	16.8073	48.3972	7.89579	12.5924	7.29453	9.24763	25.0661	24.748	27.7671	23.7379	11.4507	17.4142	25.3438	18.0437	20.7257	26.7947	33.0782	23.6184	36.9362	32.3011	49.9101	26.5312	55.5095	39.1208	56.2308	43.392	36.1625	23.2155	12.8833	27.3388	9.23374	12.572	11.2914	11.8448	23.227
ALDH7A1	14.8379	20.2155	13.1583	22.9841	44.5705	37.0078	35.3972	21.3777	14.0266	12.562	27.8715	19.188	26.6228	14.8935	12.8933	18.0668	20.5532	24.0939	25.3327	28.3739	68.2936	36.3331	33.5396	31.8258	67.9088	29.0413	41.344	36.7678	69.9	31.0335	26.2744	17.3005	24.9713	23.4256	12.8945	24.3502	26.4454	19.3571
ALDH8A1	0.154243	0.44595	1.0532	0.40499	0.136701	0.267639	1.38768	1.37067	0.0270025	2.19171	0.18796	0.272431	0.583329	1.45734	0.200361	0.406095	0.352815	0.389281	0.378046	0.0975941	0.111204	0.149673	0.0687812	0.194478	0.251001	0.0435004	0.0947425	0.0883883	0.101404	0.0311489	0.0859151	0.329542	0.0895928	0.864713	0.863585	1.14505	0.512651	0.322842
ALDH9A1	37.2316	16.2237	13.7669	12.6157	53.0175	19.1761	6.65683	15.03	11.1135	16.0867	17.8036	26.2365	19.2425	12.4199	14.7388	23.9622	13.7462	17.6261	19.6622	42.8083	30.2734	24.8483	47.3711	33.5402	15.2405	28.479	39.5256	34.2694	63.6285	30.5378	24.0192	10.7901	24.5854	13.1224	19.5534	11.1944	19.1204	17.6644
ALDOA	1933.05	190.923	432.503	492.723	857.459	908.618	825.793	533.734	177.796	319.936	333.504	434.908	853.863	206.016	133.641	190.894	241.664	166.582	213.958	480.475	1038.9	494.629	613.905	394.436	879.839	990.725	604.54	1593.45	1514.39	1649.2	531.489	811.791	312.921	728.536	355.479	399.511	434.597	431.464
ALDOB	0.0628794	0.24062	0	0	0.0586424	0.0511214	0	0	0	0	0.119238	0.123519	0.189463	0.0200705	1.5241	0.348443	0.0525032	0.378356	0.232533	0.491831	0.0901235	0.184848	0	0.125711	0.064459	0.157369	0.040288	0.030465	2.66913	0.0038422	0.104059	0.0838448	0.0540402	0.110832	0.0922788	0	0.135917	0.139027
ALDOC	2.69971	9.27717	1.92765	1.90263	1.42699	1.31472	3.28751	6.51274	1.17679	1.04316	2.25035	0.529193	1.2017	7.18428	2.08352	1.51431	2.90679	0.297052	3.62022	23.3047	1.38953	3.65406	25.5701	12.6415	0.897518	0.67779	2.34177	0.290979	14.5317	7.28313	3.50222	2.87694	4.38707	4.04383	1.34003	0.0203547	2.58617	1.92191
ALG1	20.0177	6.85141	10.9328	5.34796	21.1119	9.56376	13.7741	13.4914	7.10316	7.66828	8.82952	13.7801	10.8375	7.46334	7.09816	8.13418	5.35227	2.52907	7.30693	10.4287	16.0017	9.71237	9.3188	11.5145	11.0719	32.2414	17.6049	18.2426	12.7675	25.1832	9.8828	12.1172	10.7564	8.9732	9.53405	15.9992	7.72703	11.0502
ALG10	7.88312	6.01768	6.17309	6.45156	13.4745	7.89028	6.6594	9.13704	8.58952	5.77453	9.17444	15.0454	9.12802	6.50731	6.26135	10.9606	7.18736	7.72577	4.45358	6.82246	12.0988	5.52812	9.20843	8.32812	7.0412	9.99419	8.69472	11.0513	5.13272	8.03352	6.50796	4.59092	5.25675	3.36451	6.15997	0.0051938	7.6428	6.76699
ALG10B	3.17493	2.65178	2.13218	1.95842	3.03403	2.88936	2.30533	2.06769	2.33567	2.19419	3.44512	5.29392	3.38431	2.61487	6.05625	3.68945	2.32222	4.13661	1.44587	1.79763	3.43841	1.59726	2.82477	2.33605	2.18336	3.10196	2.66897	3.78887	1.24882	1.92565	2.4287	1.3965	1.78018	1.32884	2.41822	0.0141448	2.39674	2.85237
ALG11	34.7865	18.3765	15.9174	26.9494	24.8003	17.3616	13.475	28.1414	26.7916	12.2753	37.6654	46.6505	50.3115	33.1836	71.8054	39.3133	20.1029	19.6746	17.0393	24.1018	17.3234	29.4019	16.2209	19.0013	12.3439	26.4296	24.8981	19.3323	18.0977	20.912	25.9511	33.1463	18.3254	15.1462	15.61	22.5236	14.7054	26.9287
ALG12	12.8967	9.60747	9.12156	7.60973	12.9022	11.8625	13.0632	8.91629	6.85614	9.17392	9.81744	16.2177	10.5186	14.4414	2.43207	8.94927	7.63333	7.25327	6.64434	10.5586	9.75235	12.9949	10.6302	8.66052	9.72837	7.28239	19.0866	14.439	10.3145	10.0046	8.64574	10.6238	12.1955	12.9171	8.86733	8.98352	7.93651	7.29473
ALG13	6.29284	18.3453	11.6645	9.56369	5.87359	8.89665	13.0645	17.3194	24.1697	24.0106	18.5531	22.7723	16.5115	21.6115	20.3544	27.6713	16.3925	22.1528	19.7512	7.38474	7.10619	7.09351	6.68529	5.7506	6.1323	6.39976	5.02396	6.60561	6.69793	4.86486	16.1712	14.9007	14.8226	8.35108	20.943	16.1462	11.9977	12.6667
ALG14	5.7118	8.02141	4.41339	4.61866	14.3062	2.71817	5.10055	1.89429	4.29904	6.15674	6.58564	13.478	6.37661	6.46949	7.28684	6.3264	6.28613	6.12488	7.27397	8.34829	9.45337	6.71238	10.3358	8.26717	7.10396	7.76458	10.8301	24.4307	6.86861	9.46892	8.66788	8.22465	10.4206	5.80056	9.48227	9.10209	6.91977	8.30736
ALG1L	27.1037	0.891842	1.62462	0.627564	0.116305	1.41854	2.51227	18.099	0.148	1.25122	0.381238	1.44367	2.58447	11.3996	0.0635267	0.634197	0.545192	0.251194	0.69547	1.0832	2.73901	0.216456	0.519962	2.45367	0.305694	0.995922	0.400426	4.77746	16.4271	1.70637	0.462636	8.75385	1.85669	3.9403	5.29929	14.5267	4.74509	9.26476
ALG1L2	1.19874	0.959661	2.53029	0.682842	0.471267	2.37865	2.51926	0	2.02242	0.315482	1.87872	0.944495	1.28475	1.24478	0	2.3367	1.25635	0.665871	2.62907	1.14938	0.539741	0.598005	0.692587	0.295387	0.6702	0.401786	0.263577	0.561821	0.709352	0.185981	1.25566	0.611292	2.26069	1.42221	0.540242	0.914164	2.08757	1.50929
ALG2	22.1711	20.6305	19.7799	12.1393	23.4551	20.9835	17.1859	12.6889	51.5772	19.9171	38.783	26.1861	19.9849	20.6583	29.233	29.6281	20.8807	17.2667	15.2131	11.8997	9.2193	13.8513	17.7488	14.8985	12.9013	19.3807	16.4327	28.813	19.5208	14.5282	15.6805	15.4203	12.4866	7.95442	17.5479	9.22413	13.5242	16.5469
ALG3	27.2926	3.93575	10.3286	8.77861	10.7786	26.7158	6.26101	22.1254	3.77063	5.40779	8.7287	12.0351	12.2585	17.3395	2.60477	14.3333	8.04481	6.91605	7.12354	8.22184	15.4292	8.85831	13.9388	12.9014	16.0928	14.3051	20.2883	28.2841	17.644	14.4547	11.6706	20.695	9.17052	9.49875	14.4533	22.3869	9.38908	11.9025
ALG5	23.3305	14.295	9.43717	15.0768	29.7189	18.1358	15.6636	9.28321	16.4332	12.9978	23.7822	25.8302	16.6863	13.5766	22.4111	24.0387	18.8282	12.7279	22.6097	18.7464	21.8256	19.9505	27.9777	35.5531	27.4103	34.5097	55.814	36.1338	39.3162	36.6637	23.1315	24.5277	15.948	15.9046	17.5555	12.8485	13.7143	21.1601
ALG6	11.108	6.38221	7.72024	5.95525	13.3352	4.15363	8.92194	3.22152	6.75815	4.56726	3.68352	8.57583	6.2435	6.65339	6.02015	5.77928	5.29805	6.9522	7.08736	4.89748	8.10907	5.02443	8.05672	5.8881	6.56095	8.95383	6.04603	15.0158	4.17941	7.02245	7.65046	8.39234	6.13239	2.29029	9.37614	2.98862	4.42727	6.68775
ALG8	61.0238	18.4484	45.8424	32.9289	34.1072	17.7636	48.5589	19.4099	11.5844	85.6198	37.6361	72.4323	32.7595	23.8178	12.3352	62.2899	24.1126	13.1967	19.3513	30.2426	29.9216	22.1914	145.634	38.277	27.1668	57.558	61.2293	50.4991	69.117	51.6598	39.122	54.8726	30.9235	19.1437	30.9941	23.8968	24.6952	47.4261
ALG9	3.22038	6.50026	6.22728	5.238	6.2224	2.44678	3.12886	2.03794	3.23652	4.22004	6.22164	7.33364	3.05775	5.63761	4.22149	3.60844	6.46276	2.67999	5.65761	5.8873	3.72731	5.42595	14.7395	7.575	4.33909	5.74782	8.37613	4.20586	6.63021	5.7185	5.71357	2.95878	4.77758	2.73293	3.69447	3.88707	3.44782	4.02385
ALK	0.112004	0.318165	0.00706349	0.0869535	0.146777	0.308483	0.215631	0.8301	0.0400407	0.286161	0.0986051	0.0108084	0.209411	0.718083	1.36978	0.175056	0.410211	0.210179	0.755811	1.64051	0.0245552	0.135414	0.0726351	0.254874	0.0183165	0.0158238	0.0123977	0.0168494	0.0759557	0.0988444	0.060213	0.161332	0.181803	0.296158	0.122949	0.0483488	0.0780433	0.0886764
ALKBH1	1.53143	1.43668	1.36958	1.40537	1.99835	1.66494	2.03059	1.70341	0.80626	3.08435	1.80797	2.2138	1.01516	1.20793	0.743808	1.60745	1.0156	2.48478	1.42274	1.71727	2.81	1.68568	1.35701	1.89205	2.8145	4.81812	2.33753	3.53108	2.20899	2.79751	1.63899	1.29754	1.53001	1.3435	1.44066	1.30448	1.4223	1.79784
ALKBH2	6.11952	2.80949	1.6126	4.48515	8.17549	3.63245	11.9262	0.502037	1.76111	7.19847	6.11297	4.96535	4.51714	4.20197	0.0601879	6.31088	3.75732	2.14082	3.97058	3.37437	6.28117	3.59214	5.56571	3.53561	12.1685	5.69525	8.01994	6.46596	6.34248	5.08449	3.89263	4.597	5.56468	6.11647	4.57831	4.5352	3.32312	3.48837
ALKBH3	8.7404	4.02912	3.17	4.46295	5.88569	8.7497	7.87983	9.44114	5.18491	7.86299	6.95007	7.7373	6.36498	6.5155	2.59384	2.91181	6.58513	5.23593	10.5949	8.25888	16.6089	9.97494	12.0041	10.514	12.1682	12.1429	10.3807	10.8488	9.84784	15.9443	8.42417	6.45832	8.9382	3.62582	13.5737	5.03118	5.28515	6.76625
ALKBH4	0.424598	0.376338	0.490506	0.251925	0.538709	0.845536	0.206366	0.327193	0.0307093	0.388896	0.137696	0.394419	0.424655	0.269842	0.0109122	0.253571	0.151584	0.37253	0.276609	0.378806	0.621378	0.51628	0.305655	0.436536	0.31899	0.568525	0.555477	0.639114	0.539192	0.587497	0.358312	0.73997	0.328685	0.629759	0.370268	0.654823	0.57308	0.377838
ALKBH5	9.83675	6.69796	7.94927	6.17213	7.739	10.8442	6.5019	11.4927	4.91198	7.39104	7.84436	5.09556	7.45636	8.98615	6.19054	3.61818	5.63769	4.14582	5.55116	9.3292	6.05359	8.37525	7.25143	6.66118	5.91543	9.66488	13.6801	4.45696	9.6335	10.1661	6.46548	6.88345	7.36185	10.0955	5.22004	16.2672	5.94249	6.79466
ALKBH6	7.89175	1.78848	2.45274	3.4147	2.99216	3.51571	2.44658	4.06737	2.55986	2.27058	3.71766	2.85191	5.02935	1.33185	0.803071	2.03815	2.2587	2.67963	1.39911	2.3656	3.13917	3.57568	3.00535	1.85506	2.91567	3.0297	4.31156	4.85021	3.12865	3.15545	2.7888	4.7376	3.63347	7.01077	3.16265	5.59616	3.05872	1.97674
ALKBH7	2.8697	0.910885	2.91386	3.2001	7.04433	2.38733	2.22959	3.80782	1.90941	1.84051	2.0304	2.24315	2.75548	2.62404	0.505507	1.07792	1.87299	0.962007	1.01753	5.71645	5.156	4.88244	6.51003	4.50823	6.17517	7.4198	9.91194	12.69	8.04922	6.8373	1.95138	2.37803	3.84794	6.87005	4.84226	24.1719	3.77265	2.68611
ALKBH8	1.13121	1.93186	0.825881	1.72876	1.39346	0.907703	1.15767	0.338742	1.65151	1.17487	3.22902	2.21948	0.733845	2.02089	1.0114	1.06178	1.79437	1.60617	1.72856	1.76563	0.832483	1.98033	1.74426	1.29491	0.871412	1.50613	1.45734	1.80748	1.2396	1.28727	1.75727	1.34319	1.8923	0.825275	1.78826	1.25505	1.00119	1.33726
ALLC	0	0	0	0	0	0	0	0	0	0	0.0466165	0.0127926	0	0	0	0	0.0307973	0	0.0495377	0.0476112	0	0	0	0.0235508	0.0104605	0	0.00596232	0.0271019	0.00557014	0.027455	0	0.0293591	0	0.0143647	0.02809	0	0.00916419	0
ALMS1	11.6567	20.3458	19.3153	21.7156	7.82052	11.8947	14.1733	15.4618	24.4905	22.1453	25.2819	23.788	25.4304	14.4053	30.0272	21.318	17.5392	22.525	22.5219	10.8121	14.6843	17.5555	10.4002	9.38046	12.416	10.9079	10.6271	9.20012	7.48368	5.13057	15.7547	19.175	12.4472	6.31398	15.0855	6.69645	14.5571	18.9633
ALMS1P	0.434047	1.06469	2.48112	1.49875	0.121581	0.482868	0.80614	2.54851	1.01525	5.20683	1.68539	1.52642	2.91409	1.44099	5.34602	1.17238	0.946438	1.9528	1.10042	0.723976	0.800856	1.57505	0.705242	1.33426	1.91097	1.26305	0.832742	0.715481	3.55934	0.0736374	0.403728	3.06395	1.10447	1.43584	2.57045	1.84148	1.037	0.959061
ALOX12	0.0648476	1.02406	0.603767	0.505945	0.148888	0.544447	1.70001	0.775224	2.88347	2.78004	0.942324	0.456884	1.24673	1.45451	4.87729	0.648028	0.505132	3.68753	1.24927	0.261661	0.0646562	0.271591	0.191951	0.0614105	0.123902	0.172128	0.0623174	0.0157089	0.119266	0.031704	0.595929	0.581112	1.04297	1.43834	0.895198	1.86867	1.12067	1.02102
ALOX12B	0.0658845	0.00751157	0.365832	0	0	0.065969	0.0753253	0.0830391	0	0.183101	0.025641	0	0.564203	0.0906743	0	0.0733063	0.0762085	0.526507	0.0272759	0.0581132	0.0151596	0.0514515	0	0.0767928	0.0651707	0.0230621	0.0324752	0.00368329	0.00604555	0.0297248	1.95048	0.0202879	0.0855909	0.0754895	0.00388329	0	0.0860095	0.201814
ALOX12P2	0	0	0	0.0347086	0	0.0370579	0	0.0746702	0.00367564	0.0501047	0.0691053	0.0021052	0.0316934	0.0116524	0	0	0.00760679	0.0417757	0.0122535	0.0202681	0	0	0.00537285	0	0	0.0124128	0.00582788	0	0.0135553	0	0.000618187	0.0291799	0.00658847	0.0402976	0.00488732	0.0530641	0.0639463	0.00726799
ALOX15	0.319523	0.133881	0.161364	0.0676382	0.0105152	0.0535938	0.300837	4.08168	0.0079914	0	0.0654469	0.0130504	0.13096	1.29968	0.289423	0.319845	0.251491	0.439464	0.0696262	0.152641	0.476138	0.120432	0.233322	0.264037	0.208804	0.791177	0.0150582	0.133192	2.51835	0.0430485	0.253542	0.576464	0.366497	0.613387	0.299298	0.048709	0.53081	0.0520394
ALOX15B	0.909692	0.958663	1.64617	0.433077	7.51918	1.43693	4.77484	2.83145	0.797502	1.69675	0.501533	0.464129	0.659854	0.422588	0	1.49647	2.78913	1.912	1.54956	5.95069	0.132163	0.427332	0.0537855	0.334525	0.220705	0.199593	0.0565218	8.67382	2.2994	0.197288	0.812918	0.748284	2.71	7.37526	24.9649	0.0240645	2.8354	22.8543
ALOX15P1	0.0723951	0.100887	0	0.0226961	0.0815924	0	0	0.0278999	0	0	0.115632	0	0	0.0558733	0	0.0655376	0	0	0.0612394	0.0464212	0.144155	0.0668319	0.0148717	0.0760627	0.0888098	0.0438151	0	0.0174881	0.431529	0.0719142	0.00421399	0.25077	0.0209388	0.0393552	0.0342441	0	0.0673764	0
ALOX5	5.81557	8.28533	11.5244	11.9777	12.788	6.20578	10.0776	16.0923	23.723	9.59175	14.3595	2.81876	4.98253	15.514	2.34634	9.47143	13.2805	9.40649	10.6465	15.3744	5.26584	18.9098	4.72514	15.333	10.9774	21.6424	10.7843	3.08109	65.5599	13.007	16.456	8.12746	23.7459	18.7931	9.03531	14.9461	12.5614	7.44699
ALOX5AP	12.3023	2.16501	12.9129	15.9229	16.5355	5.89745	16.0647	5.4606	6.31769	2.2411	15.3275	2.71963	3.06656	4.65069	2.1177	11.9392	9.78623	5.33529	5.97021	24.9039	16.363	14.6891	14.4441	20.7113	10.3829	11.7583	23.9884	26.4475	12.7783	18.9925	21.1683	8.11702	7.36816	5.54889	5.10356	9.63082	9.31333	9.17589
ALOXE3	0.400646	0	0	0.0632536	0.0430902	0.266845	0	0.32231	0	0	0.488999	0	0.323141	0.00495507	0	0.0335719	0.0581293	0.782106	0.0468292	0.0441547	0.155578	0.254668	0.00454599	0.77347	0.751065	0.501441	0.135869	0.00279983	0.110255	0.40347	1.00696	0.381278	0.0799318	0.0576814	0.355038	0	0.181591	0.398609
ALPI	0	0	0	0	0	0	0	0	0	0	0	0	0	0	0	0.0143687	0	0	0	0.0158143	0	0	0	0	0	0.00903769	0	0	0	0.00363986	0.00365475	0	0	0	0	0	0	0
ALPK1	1.73226	6.018	3.7871	4.58675	2.90825	4.25824	7.38232	3.5501	8.73715	7.42487	6.43056	7.13441	5.2641	7.12238	4.01217	7.87776	6.5663	6.58179	6.21813	5.07731	2.05378	3.85113	2.80697	3.36086	3.71838	5.20695	4.82248	3.28086	3.49861	3.47518	5.31563	5.0279	5.62426	2.93324	3.48342	4.30228	4.8583	4.42493
ALPK2	0.0858085	1.3879	0.725183	1.80456	0.177051	0.856973	0.882673	0.701841	0.959595	1.27425	1.19749	0.0659355	0.134936	4.02052	0.00303684	0.502337	5.3124	1.52491	0.785602	0.102898	0.38881	0.475758	0.306282	0.270947	0.411476	0.192617	0.041324	0.0083993	0.415957	0.41378	2.71081	0.148744	0.609606	1.13037	0.260406	0.104555	3.11945	0.622162
ALPK3	0.464943	2.37444	0.528098	0.450992	0.242039	0.967013	0.790636	1.1031	1.35812	0.860933	0.684588	0.293053	0.656907	1.38185	0.670351	0.444356	0.807934	1.3031	2.17942	1.02027	0.435352	0.389357	0.969793	1.13238	0.53257	0.274935	0.222755	0.234686	0.410648	1.50205	0.830383	0.465709	1.56722	1.0269	0.577105	0.476725	0.675308	0.321268
ALPL	1.3832	3.09884	0.688286	0.528609	5.03027	5.51967	3.20982	0.464762	11.8003	2.71835	3.4764	0.770667	1.60748	5.55795	1.3664	2.36864	3.70867	1.02766	3.1081	5.06617	1.70099	3.63844	3.73031	4.94763	1.35072	1.67555	0.811526	16.8376	3.84841	0.967503	1.0977	1.13954	2.14582	7.64286	5.16311	1.24257	2.86106	2.39893
ALPP	0	0.0108401	0.00264134	0.013051	0.00979644	0.0797583	0.00652879	0.0175313	0	0.0103482	0.00462407	0.0121704	0.0537892	0	0	0.0618907	0.00732947	0.0101986	0.0118074	0	0.0016371	0.00467276	0	0.00967508	0.0159036	0	0.00280665	0.00636451	4.37057	0.00962397	0.00860803	0.00468702	0.00240329	0.0168108	0.00700923	0.0513462	0.021911	0.0364578
ALPPL2	0	0	0	0	0	0.0248224	0	0	0	0	0	0	0.0513047	0	0	0.0680392	0	0	0	0.00323972	0.0190152	0.0163047	0	0.00481617	0.00142168	0	0.00977622	0	0.291193	0.00372854	0	0	0	0	0	0	0	0
ALS2	8.18016	15.2918	10.7331	8.27464	4.5186	8.51782	8.8545	8.43788	10.3216	9.5881	9.1941	9.16191	11.1901	8.91247	11.0243	9.01284	9.54778	14.1807	13.9856	10.9328	6.53955	10.8115	7.04286	8.4892	12.0333	8.81252	9.82659	9.8793	8.58374	7.34275	9.79785	13.2526	9.81264	7.91336	21.234	14.0538	9.70668	10.1313
ALS2CL	0.572616	3.00666	0.793963	0.93484	0.80744	2.93182	3.44256	1.58556	1.6182	3.98009	1.53202	1.18924	2.05703	1.63266	0.531505	0.995743	2.13113	1.58682	2.90999	2.70179	0.608507	1.57441	0.455881	0.765054	0.165661	0.560609	0.328684	0.224442	1.82255	0.727966	2.50004	1.69344	2.9883	2.26122	1.04264	5.30745	1.9574	1.19666
ALS2CR11	0.158255	3.3489	4.36183	3.65481	0.21326	0.353567	1.03286	0.682548	0.884582	2.60832	0.593693	1.08832	1.24106	0.415831	0.76519	2.10178	1.65086	0.474643	2.10405	1.2973	1.25958	0.978454	2.8976	1.20659	0.4332	0.200993	0.0631619	0.163519	0.232593	0.455813	0.667786	0.354509	1.10038	0.275217	0.571216	0.310688	0.443633	0.530385
ALS2CR12	1.68322	1.58462	0.622255	0.869951	0.508343	0.874499	1.22101	5.54509	0.954386	2.90478	0.848886	0.903681	0.914175	4.18661	0.550772	1.2694	1.33242	1.15647	1.33817	1.28036	0.738802	0.81219	1.14134	1.37814	1.79678	2.05292	0.97444	0.76644	0.446165	0.585697	0.792301	0.605327	1.41222	1.22155	0.884141	1.53026	1.27253	1.59402
ALS2CR8	2.99884	8.70223	3.998	2.64057	3.24858	3.69779	3.45044	2.56759	4.90669	5.52752	8.87997	5.80177	5.73726	3.89173	7.73773	5.25698	6.03715	4.98154	7.16421	3.53044	2.06356	4.12897	2.00741	2.90467	3.29225	3.97244	2.67535	4.47631	2.75093	2.20711	4.22558	3.2078	3.07754	2.14433	4.80312	3.45715	3.04667	3.40498
ALX1	0.0853626	0.0308542	0.672921	0	0	0	0	0	0	0	0.00989597	0.00482901	0.163746	0	0	0	0.072648	0.0181065	0	0.0270632	0.00396194	0	0.14401	0.000686584	0.0835901	0.0128543	0.00761631	0.0076978	0.000372452	0.0546555	0.185635	0	0	0.0257077	0.0714455	0	0.0207286	0.0806048
ALX3	0.217999	0.345409	0.0322357	0.146948	0.0916211	0.320221	0.596051	0.269642	0.602897	0.0140138	0.136267	0.299144	0.199206	0.045438	0	0.0777635	0.165044	0.562794	0.144815	0.0173831	0.101857	0.0146695	0.0433548	0.0458634	0.0712859	0.0660995	0.168384	0.0461823	0.0976187	0.0334091	0.152022	0.0572305	0.0586522	0.245022	0.328545	0.56188	0.223283	0.247891
ALX4	0.0155631	0.485711	0.0203053	0.0100027	0.124268	1.54704	0.00335008	0.718615	0.0536919	0.0212271	0.00567137	0.0279762	0.203296	0.155845	0.150939	0.0909283	0.187255	0.234395	0.280731	0.345242	0.0798214	0.408876	0.011767	0.0673911	0.00992567	0.00202415	0.00142711	0	0	0.0829321	0.0263873	0.0756478	0.253392	0.104102	0.199997	0.0409427	0.197452	0.258193
ALYREF	51.0823	3.98161	7.53737	7.08469	12.5478	16.5229	11.8283	11.7886	3.24444	3.45897	5.35163	6.10572	10.8449	3.11024	2.41868	7.53049	5.76761	3.57984	6.57851	11.5961	15.7291	13.1984	25.7163	30.1995	72.9986	19.5974	16.9055	27.0492	19.2405	15.6549	7.31781	17.9824	7.90587	9.42881	15.9779	6.23501	9.41514	5.69417
AMACR	1.07	0.515357	2.67578	2.21047	5.56695	1.07961	1.25936	0.111587	0.579259	1.08006	1.05187	2.28918	1.8773	1.68346	0.86861	1.04493	1.43362	2.94846	0.969515	1.6116	2.9392	1.07808	2.68296	2.62258	1.54061	1.90978	2.35501	3.60669	9.08235	3.62299	2.07385	1.0729	1.98731	1.61157	1.62731	4.72379	2.69792	1.52046
AMBN	0	0	0	0	0	0	0	0	0	0	0	0	0.00894644	0	0	0	0	0	0	0	0.00483259	0.00346231	0	0.0285599	0.0180838	0	0	0	0	0	0	0	0.0120561	0	0	0	0	0.0284647
AMBP	8.8651	0.0687467	0.516973	0.0414842	3.83971	0.015062	0.534389	2.1037	0	0.0289965	0.164557	0.387075	3.324	0.199728	0	1.14013	0.38827	0.0415812	0.249808	0.62442	0.682419	0.684358	0.235987	0.368254	0.12664	2.31123	0.126307	19.4459	2.76473	0.242367	0.266833	1.99855	0.0520153	0.782263	0.10623	0	0.175601	0.215509
AMBRA1	8.55723	9.20303	10.776	9.65157	7.14378	12.9406	9.49117	11.4668	8.40887	13.28	9.84819	9.04779	11.9654	15.3751	8.68753	10.3932	9.07205	8.22724	9.95116	9.12555	9.17963	11.3396	5.89534	8.10448	9.03119	12.3465	14.2529	4.96218	7.59414	6.99483	8.5282	9.08148	9.89692	9.40326	11.5775	6.45635	8.217	9.00455
AMD1	4.17009	4.70139	3.96445	4.51193	7.19666	8.80996	7.48679	4.59082	5.66246	3.52828	4.72936	3.28739	3.19941	3.09403	3.78294	7.17847	6.18495	3.38156	10.4564	6.68615	3.49922	5.49848	6.72318	6.26132	7.12174	4.06591	3.13989	4.29724	17.4467	8.2135	4.98952	4.09878	4.03631	4.45071	12.6233	2.29518	3.5148	4.55427
AMDHD1	0.421332	0.115608	0.0649106	0.0803638	0.0539048	0	0.454176	0.143493	0.741708	0.112971	0.136656	0.0666273	1.37706	1.60701	0.0108308	0.0954577	0.310907	1.21748	0.573267	0.694239	0.0855141	0.177199	0.049951	0.379983	0.282854	2.80983	0.366195	0.345531	0.190316	0.66245	0.194367	0.292808	0.284038	0.173883	0.293994	0	0.437485	0.33185
AMDHD2	3.86998	2.73	3.59782	2.81493	2.67856	2.96079	9.00833	7.04731	0.768561	4.59577	2.50102	2.58339	3.59686	4.15934	1.61085	1.65569	2.44548	2.03667	1.5749	4.75442	3.49016	4.1899	2.28392	1.90616	5.51591	5.93909	2.94509	2.95239	2.5965	5.6259	2.37304	2.84898	3.0334	4.28939	3.16342	3.62604	2.47962	2.05022
AMELX	0.0209806	1.44715	0	0.0597164	0.165355	1.31942	0.0289746	0	0	0.153743	0.0760789	0.223174	0.357979	1.85068	0.0350829	0.374207	0.704187	0	1.15573	0.900524	0.0313434	0.623858	0	0.0661556	5.98701	0.08778	0	0	0	0.268052	0.665152	0.204945	1.58554	1.55552	0.587828	0	0.53329	0.881985
AMELY	0	0	0	0	0	0	0	0	0	0	0	0	0	0	0	0	0	0	0	0	0	0	0	0	0.548032	0	0	0	0	0	0	0	0	0	0	0	0	0
AMFR	107.829	16.3429	16.6106	12.9766	27.0766	23.2678	19.224	24.8486	8.23629	14.8306	29.1246	6.05224	25.2425	21.5568	19.1921	9.9496	14.3731	6.65711	18.2652	29.7079	44.3424	39.5358	87.8352	28.8516	39.4188	36.701	88.0138	23.4086	37.5357	28.6576	10.545	25.4259	18.8384	38.5081	13.0365	16.2344	23.0772	18.2543
AMH	0.00640662	0.898069	0.264415	0.0379754	0.32996	0.155564	0.122998	0.0802395	0.161866	0.800245	0.613453	0.442768	0.700747	0.89409	0.931952	4.00347	0.362551	0.728089	0.291842	0.11841	0.977245	0.607415	0.779161	0.0363995	0.67399	0.0408076	0.0287136	0.256035	0.210236	0.0752359	0.0140904	0.09182	0.179306	0.764069	0.278249	1.99672	2.79984	1.07947
AMHR2	0.00843055	0.180714	0.135009	0	0	0	0	1.03553	0	0	0.0527995	0.046358	0.057922	0.0317411	0	0.0604144	0.0465756	0	0.112241	0.0430162	0.0126059	0.0112727	0.130603	0.0221163	0.00472394	0.0230088	0.0269572	0.0122483	0.0125289	0.0566392	0.00512229	0.016677	0.0467905	0.0456101	0.0320796	0	0	0.0463037
AMICA1	1.78935	6.0595	8.11481	3.36641	14.3515	4.16971	2.47356	5.33153	17.236	2.93578	4.18051	2.11018	4.38231	16.46	3.57842	9.41112	16.5573	3.47072	9.00609	24.4903	1.80373	2.36654	4.01827	6.06619	5.58211	0.838201	2.06192	1.81056	4.35767	4.92344	4.07578	6.55309	7.74581	14.6935	6.93439	0.178262	11.4284	3.9601
AMIGO1	0.60614	0.570878	0.240946	0.519494	0.83354	0.267385	0.290023	0.336552	0.610014	1.20996	0.532663	0.812226	0.843268	1.43711	0.00928495	0.490269	0.600654	0.440685	0.960484	0.926083	1.26379	0.883907	0.708157	0.794555	1.28669	1.89335	1.55356	2.15779	1.55336	0.81727	0.56311	0.48515	0.607085	0.619979	0.751552	0.0663855	0.49216	0.590792
AMIGO2	31.4286	5.20234	3.61427	4.5725	7.42505	3.08749	4.90698	2.99128	5.55224	3.39196	3.22463	0.420698	8.17485	9.71467	5.09519	1.92777	4.60852	4.68801	9.26722	13.2843	2.04171	5.25595	8.06089	6.95583	1.07785	0.6845	0.301287	2.95283	29.3776	2.72142	7.49431	12.5965	4.37447	7.22941	10.8928	0.244512	5.72932	3.50597
AMIGO3	0.985891	2.35467	1.80086	2.66381	1.55069	3.19815	3.87955	4.12145	3.66449	2.42499	2.30256	3.3921	3.34101	3.66223	2.83877	3.26382	1.89823	6.28861	1.42674	1.16181	0.485233	1.02268	0.333394	0.369765	1.50672	0.728623	0.9346	0.802353	0.386904	0.817971	1.11881	1.00199	2.52728	1.5581	0.599382	6.75111	2.09721	1.47686
AMMECR1	0.740558	0.329055	0.0942705	0.459594	0.871118	0.723851	0.52598	0.497785	0.135483	0.611051	0.311965	0.528078	0.479814	0.297095	0.905779	0.698652	0.366655	1.0594	0.505978	0.37868	0.534311	0.648902	0.525735	1.14007	0.894588	0.549796	0.84572	1.4294	1.10766	0.535755	0.508746	0.385748	0.921107	0.61102	0.457995	0.822979	0.317046	0.957716
AMMECR1L	4.32131	2.83049	3.62901	2.6182	2.68773	4.52266	4.46175	4.34358	3.00824	3.93881	3.98723	3.20203	4.01192	3.95514	2.60291	4.26609	3.52133	2.50866	4.23838	3.75252	2.94501	3.45524	3.9695	5.51365	3.46439	3.93024	4.06793	4.04283	4.01483	3.61774	4.15447	6.50207	5.03895	4.03972	5.85514	4.04836	3.77742	3.62045
AMN	0	0.112872	0	0.138688	0	0	0.175187	0.764184	0	0.0529494	0.0750239	0.0470519	0.0352686	0.0644107	0.0152067	0.0611781	0.0708033	0.0253226	0.0797399	0.0436768	0.0127992	0.0705895	0	0.0864468	0.0239845	0.00778703	0.0218944	0.00621794	0	0.00944126	0	0	0.189926	0.145463	0.0517149	0	0.042167	0.0936048
AMN1	3.91982	3.25449	5.50325	4.59848	3.84646	5.99134	3.23025	1.58384	2.13064	8.70707	5.90778	8.7248	3.02057	4.52507	11.1811	3.61228	4.37808	6.24749	4.75946	4.18716	3.94901	8.51127	7.41654	10.7914	7.61682	7.83616	5.90217	12.4321	4.53467	4.06449	5.18052	5.5169	5.75246	4.52332	6.86839	3.04832	2.69742	5.79079
AMOT	2.83577	3.49292	2.46428	1.3146	3.20708	2.40323	0.67778	2.48125	1.90781	1.31294	1.10295	2.87017	1.95717	1.03763	2.42492	2.23653	2.90633	1.19324	5.00703	4.61321	4.20491	5.28934	3.82742	3.47766	3.70075	4.37484	1.90502	3.45207	9.0043	6.57765	4.61457	1.28301	2.49746	1.03312	1.71418	2.06227	4.36561	5.39969
AMOTL1	3.11968	8.38264	2.82836	2.26514	5.39907	4.24151	1.42523	3.28997	5.73022	3.38193	2.95889	1.28448	3.75121	4.84468	5.07814	3.42127	7.31124	3.7174	9.47494	7.79848	4.15598	8.32989	4.34415	5.39779	3.3684	1.36813	1.09845	0.645113	1.62475	4.97579	4.93119	2.08724	5.94625	4.28424	4.42239	0.842124	3.5411	4.30569
AMOTL2	6.46641	10.8704	3.91555	3.43578	2.89389	9.71121	3.52793	7.38435	6.18753	5.95831	3.32429	3.56219	3.64518	7.08622	3.43474	2.97098	8.05401	6.1236	11.5019	16.0093	6.83488	11.9272	18.1716	10.3545	2.45523	5.60974	5.07031	2.9813	3.23735	10.5911	6.2392	1.92279	9.50409	9.28408	3.54933	5.58245	7.11002	5.58005
AMPD1	0.0372069	2.74747	0.450383	1.53298	0.654431	0.129601	0	0.749508	4.10818	1.40959	0.134377	0.250566	1.33768	0.325634	1.66076	0.458513	1.72183	0.191829	7.35407	0.304801	0.321988	2.3491	0.0283117	1.72168	0.169436	0	0.10898	0.0463592	0.735625	10.6306	0.0469014	0.744031	1.87833	0.291411	1.2451	0	1.42088	1.16918
AMPD2	6.15627	6.53269	4.70725	4.79669	4.53244	9.22369	6.00289	4.7173	4.65093	4.61533	3.97385	3.64518	5.14281	7.36902	0.55313	3.18524	5.48312	2.80025	4.36585	4.76031	5.0027	6.58756	4.33952	4.02347	3.33454	3.9477	9.91321	3.01848	4.46029	3.41177	6.14029	6.95317	6.25209	7.17523	9.19318	6.01542	4.23466	3.76961
AMPD3	3.6503	3.58446	4.52218	5.43318	3.78871	4.06366	5.80636	5.62828	5.47746	4.01552	6.37232	2.84438	4.82838	5.49324	1.74556	4.18975	5.89871	4.76546	3.33006	6.03656	2.58289	2.00236	2.5236	2.41751	3.64551	4.33339	2.80047	2.12734	5.18044	1.90732	5.12597	3.17942	2.94989	7.44512	2.26346	3.55518	3.42754	3.12244
AMPH	0.395797	5.39891	2.38717	6.1796	1.10888	1.84775	0.699061	16.234	5.30502	9.35109	0.760674	0.362108	6.22389	1.92435	10.7931	0.927123	5.894	6.67394	2.78652	1.59331	6.70621	10.0114	1.93371	1.352	0.51681	0.557166	25.5304	0.183585	52.9707	3.41109	1.12883	2.09055	2.83946	3.53944	1.73422	4.64664	2.04623	2.02956
AMT	1.47323	17.8486	11.4904	7.40593	1.49748	4.03389	7.35051	8.48269	15.9752	15.8049	12.1047	8.38363	7.78933	13.1581	17.6174	9.35501	8.71656	19.0102	18.0225	7.53086	1.81424	8.45393	1.98685	1.16658	1.99588	2.93744	9.41486	1.53235	1.66139	0.871167	9.08672	3.41754	12.5673	17.1025	4.84785	18.5143	10.1771	6.57181
AMTN	0	0.208157	0	0	0	0	0	0	0	0	0	0	0.0194617	0	0	0.121791	0	0	0.0946242	0.00925746	0.0324731	0.023632	0	0.0182769	0.024447	0.013167	0.12921	0.0315375	1.4723	0.181969	0.114233	0.0111636	0.0391978	0.13099	0	0	0.0139602	0.0466154
AMY1A	1.4817	12.8734	8.8768	4.73365	0.846224	5.10007	3.40172	3.47647	26.9648	8.56104	6.36548	13.4349	7.58947	10.4362	6.5063	6.23876	8.00111	24.6744	14.9701	3.67666	0.805946	2.88022	3.0045	1.28921	1.47843	1.4611	0.522119	1.28923	0.703233	0.747748	4.96702	3.41592	7.01978	4.49768	7.45601	3.29208	9.07424	6.89007
AMY1B	5.72165e-05	8.68579e-05	0.237025	8.45236e-05	6.07028e-05	9.20877e-05	8.38586e-05	7.18841e-05	0.000100496	9.1004e-05	7.26975e-05	7.9964e-05	8.05445e-05	7.42511e-05	0.000103619	1.8768	0.129238	8.82574e-05	7.15601e-05	0.0131118	4.13032e-05	3.07273e-05	0.0132751	0.0239578	3.18614e-05	5.11536e-05	0.107932	3.93966e-05	3.34271e-05	0.0508947	4.32532e-05	0.108959	5.51614e-05	4.62365e-05	4.56329e-05	7.68607e-05	5.80842e-05	6.346e-05
AMY1C	1.24021e-06	9.74762e-07	0.00046439	1.36926e-06	1.66228e-06	1.49793e-06	1.67786e-06	1.22988e-06	9.00477e-07	1.21138e-06	9.94793e-07	8.56126e-07	1.07182e-06	8.49479e-07	1.60694e-06	0.000395431	0.000419811	7.79149e-07	9.21001e-07	0.000153397	9.96343e-07	4.10242e-07	0.000256652	0.000152041	5.54312e-07	1.06886e-06	0.000162522	8.78346e-07	7.84052e-07	0.000177154	5.34501e-07	0.000205235	6.55187e-07	6.07747e-07	4.93319e-07	1.37522e-06	6.3876e-07	8.00809e-07
AMY2A	0.930882	9.87583	11.2633	2.89962	1.2096	2.93326	3.10016	0.495728	6.09772	5.94263	4.49747	11.5154	5.83244	7.81569	13.3353	5.46226	6.69903	10.8826	15.394	3.42818	0.442403	2.54606	3.93224	1.28172	1.15488	1.09441	0.570355	1.53143	0.668525	1.10308	4.24649	1.61602	5.17722	3.64282	4.59384	0.573132	5.55717	3.75364
AMY2B	13.8144	101.097	81.8206	39.781	11.6208	31.0439	21.5225	6.6887	170.524	52.74	50.7343	89.6016	50.6411	71.3971	49.2763	49.8418	69.3834	156.848	147.685	36.8456	6.53509	33.0975	29.6056	12.5134	11.023	10.7543	5.89223	11.6865	6.95535	8.69512	40.2832	29.2635	58.7305	38.7951	54.0441	14.9696	67.2957	49.4297
AMZ1	0.918778	0.0456034	0.864956	0.748109	0.0589685	0.232376	0.0625705	1.08934	0	0.149798	0.0883644	0.02325	0.818279	0.100581	0.477386	0.0687937	0.0280098	0.448273	0.0940518	0.57423	0.388229	0.122581	0.259843	0.13847	0.0309915	0.0353775	0.0106868	0.00201803	0.10093	0.0203114	0.236418	0.881711	0.0499709	2.01744	0.274882	0.109167	0.150952	0.49192
AMZ2	111.671	33.2946	32.5955	46.7538	33.4113	62.9409	59.2753	75.6457	73.1295	75.2798	62.5548	66.7172	126.599	45.7505	90.1859	62.2544	46.3128	39.577	52.7531	28.5607	35.6814	28.8569	56.0778	85.2088	159.476	56.987	44.523	91.3521	55.4334	43.2751	51.5638	96.9791	39.3575	28.372	86.687	27.265	34.5561	53.3954
AMZ2P1	5.21885	3.89356	3.00369	4.30365	2.11891	7.04636	4.33362	9.69767	3.9609	6.76952	4.32609	5.60334	6.97334	4.43369	2.12962	4.81072	3.72675	3.56063	3.5664	2.51273	1.46967	2.18028	3.20211	3.52409	6.83711	3.09492	1.74529	4.34581	2.95087	2.04852	4.39238	7.50296	3.92902	3.97602	7.20885	1.44833	3.31824	4.34055
ANAPC1	28.1654	23.4897	19.1678	19.883	14.9205	25.9283	23.5115	25.0949	19.662	29.675	26.0437	22.8713	35.9039	26.2979	28.3404	33.5264	23.4535	27.7955	21.3316	21.8003	14.6128	18.5477	18.8099	19.9103	15.8327	20.1288	19.2123	20.906	24.4365	15.7398	23.8614	26.7272	19.73	15.1659	28.3796	9.73274	19.4198	20.8363
ANAPC10	11.1591	11.5867	7.08609	7.91918	5.88733	5.17803	6.98197	5.92302	3.219	5.50199	8.55164	9.64393	8.77224	7.18262	17.1723	7.99018	8.77738	6.93778	8.35258	10.958	13.7864	12.1865	17.8267	13.6617	11.7959	10.056	12.294	12.2747	7.04892	8.74205	6.07609	5.0324	3.60133	2.34907	5.75468	3.86772	3.87771	5.78851
ANAPC11	25.4784	2.55666	4.48666	5.56577	13.2508	12.4747	12.4888	21.6161	4.4815	2.6356	2.4582	4.06691	12.4414	5.46138	1.68971	4.3324	2.49326	4.40329	2.81491	3.79264	4.39212	4.64545	11.202	8.17751	27.2264	8.84063	8.89702	15.2502	5.87371	9.12459	4.34398	15.1901	5.95091	7.77823	17.3818	15.5649	6.49475	3.94524
ANAPC13	7.32709	5.02377	3.34269	5.08977	12.0219	10.8208	2.61663	10.6342	3.43811	2.76938	3.88441	11.6722	7.324	3.5019	1.90971	7.68659	5.14185	4.06322	8.35894	8.61887	10.9939	6.80956	10.7562	13.9758	9.58803	14.3627	18.1734	22.3265	12.7833	14.1489	10.4069	8.35189	7.18069	9.56031	10.3529	11.8352	6.2338	9.69345
ANAPC16	5.97044	2.60789	3.3667	2.61416	6.39727	2.39286	3.52491	1.69371	1.2877	1.41722	3.15652	4.89084	2.76093	2.84848	2.28116	2.8456	2.46963	2.38029	3.43895	5.18136	4.17854	4.23657	6.82737	5.33367	3	4.8488	4.46034	4.31067	8.13076	9.35534	3.24105	3.52116	3.94556	2.72104	3.31988	8.1952	2.12159	3.45731
ANAPC2	9.61573	6.38882	6.29616	6.16742	5.12485	8.88663	8.5912	15.8655	6.16291	6.15704	7.70383	6.03355	4.80871	12.6232	2.61401	4.19282	5.06853	3.84608	4.97537	7.95215	4.77997	8.89463	5.32364	4.68116	4.02155	6.55688	5.71497	5.93855	5.2515	4.18838	4.53854	6.02821	8.68842	8.82902	14.9235	19.5023	7.37789	4.0233
ANAPC4	4.41464	12.2817	9.24127	7.40298	13.8046	7.2233	11.2174	8.69661	15.8391	10.927	11.7528	8.92965	10.6119	7.99194	9.21963	11.5782	10.913	13.2531	13.1965	9.43728	7.64437	8.87601	9.41185	7.63886	6.46072	7.76085	5.8495	7.12752	5.7542	9.77264	11.7648	7.73013	8.90851	7.11371	10.1047	1.32131	7.82054	8.30834
ANAPC5	39.6985	27.9581	19.3275	20.8521	37.5198	19.045	34.0134	55.0057	18.2694	31.1977	27.3844	18.9328	25.3374	24.1434	34.4976	24.9661	23.7243	31.5813	26.9179	27.2547	48.6115	31.8386	33.6562	19.8499	27.9281	27.4665	36.1651	35.4766	28.8709	30.4299	23.3589	24.6442	26.609	31.8105	22.9427	30.814	25.4167	19.3796
ANAPC7	31.1683	12.3143	10.2805	17.1813	17.3557	19.1553	27.4778	10.9783	14.483	12.3627	17.7514	15.9918	22.7061	14.1393	16.4837	21.6162	15.4212	22.6907	14.2398	17.5574	17.1978	14.9572	17.9602	11.843	30.469	14.6237	21.9633	22.0116	20.8469	18.0445	15.4025	23.345	15.1749	10.0823	15.1851	13.8005	13.8845	13.7742
ANG	6.2044	16.6945	11.1163	7.8386	49.5674	5.41484	7.66702	1.60633	6.30146	18.6521	33.2197	17.117	38.6433	6.86814	0.105773	24.1288	13.8245	15.083	20.9512	18.4909	35.2726	38.6558	32.5714	47.0736	5.18577	35.3411	28.2864	42.9639	43.6383	25.2415	13.1893	4.47673	14.0122	5.36763	10.31	10.1873	21.086	11.4622
ANGEL1	1.4505	2.31214	3.19618	2.12128	3.04324	2.06017	3.35383	3.05307	3.48493	2.82171	2.37868	1.61064	2.50434	3.35163	0.634032	3.27199	2.82502	1.97987	2.00507	3.66678	1.58591	2.76032	1.26834	2.10567	1.74579	2.00927	2.51174	1.46979	2.54231	2.19977	2.50809	2.45135	3.25435	4.23922	1.78233	5.42698	1.51105	1.57891
ANGEL2	4.39514	5.61646	3.77687	6.52056	5.51094	3.64171	4.12951	4.08557	8.32386	6.8736	9.71371	9.66819	4.85806	3.11193	9.61987	10.2894	4.75659	8.42367	6.07732	4.79142	4.47161	3.22067	3.84699	4.62648	5.62908	5.71575	6.28914	5.79802	5.33963	4.61348	7.18816	6.15614	6.56848	2.07541	5.69877	2.14031	4.0805	4.68183
ANGPT1	0.158421	2.10708	0.469066	0.254138	0.391991	2.55701	0.288944	0.4937	0.826201	0.543171	0.295236	0.213152	0.643244	5.32861	0.507053	0.960451	1.65037	0.275601	1.45238	4.78645	0.420849	0.711759	5.89092	2.65689	0.652075	0.139006	0.166955	0.283704	0.562999	0.573313	0.67431	0.16457	0.6859	0.60647	0.584124	0.00370653	0.814299	0.397131
ANGPT2	0.960883	2.76756	0.98771	1.57811	1.16681	2.33028	0.929651	0.0578114	2.06607	1.4663	2.63746	1.00564	1.9399	3.6379	2.28938	2.78027	2.83784	2.61825	2.86141	2.21735	2.90194	3.02866	2.53508	1.73027	1.1463	1.20447	0.624693	1.50126	0.840846	2.56404	2.66579	0.976887	1.32221	0.940041	1.51318	0.414701	1.93927	1.53731
ANGPT4	0.0405882	0.348946	0.0121206	0.0200286	0.0151499	0	0.0797855	0.414452	0	0.0316356	0.0340561	0	0.0841801	0.154184	0	0.0194566	0.179965	0.42408	0.75141	0.806316	0.0657544	0.271946	0.0722926	0.0725954	0.0189316	0	0.00433027	0.00983023	0.0282555	0.0248328	0.0792694	0.0537832	0.163835	0.426466	0.164695	0.155839	0.114067	0.126496
ANGPTL1	1.17733	9.5673	4.47448	2.70405	0.859589	0.79491	3.62568	1.7523	12.0308	6.57164	7.01396	7.6565	5.35049	2.47679	19.7542	10.2069	4.44444	9.51325	6.20274	2.46231	0.674105	3.02175	2.01461	2.74637	1.93026	0.795032	0.367483	0.281896	0.235361	4.22823	5.0766	3.45155	5.86733	1.7537	4.12283	1.96078	4.26997	5.23642
ANGPTL2	3.94168	13.6377	2.29275	7.87953	3.1444	6.11247	3.27638	2.01204	6.76874	5.07388	3.00013	2.20751	4.47511	8.60348	5.51385	4.82522	11.3292	3.89976	13.0942	10.8771	4.55029	13.1811	19.3301	15.4805	3.51612	2.19323	1.56318	0.844239	3.30901	16.9109	15.9007	3.95908	16.0269	16.0999	8.66464	1.38033	9.06372	11.5075
ANGPTL3	0.248052	1.12616	1.76139	0.96925	2.81076	1.41222	1.92425	0.0834909	2.55274	2.05314	1.56424	1.4816	2.23955	2.29178	3.47229	2.75608	1.45153	2.45618	3.31092	0.408671	0.452392	0.291472	0.132702	0.347565	0.223392	0.330327	0.170477	0.140683	0.440347	0.155372	1.99347	1.21571	0.836607	0.33062	1.73127	0.155523	1.02293	2.25463
ANGPTL4	5.94441	8.32369	3.82122	2.94524	2.38822	25.009	1.85368	3.54576	0.503026	7.44887	9.27442	1.1693	2.92322	2.76707	0.955418	2.17875	4.48717	1.69308	11.1123	12.1595	1.93923	3.36416	22.2815	9.68033	14.005	0.36696	0.782693	0.0851078	3.43443	4.92722	3.67175	1.48868	4.55392	17.2472	2.55277	5.91146	4.77987	1.33318
ANGPTL5	0	0.238935	0	0	0.565917	0	0.119747	0	0	0	0.176739	0.238595	0	0	0	0.147676	0.592648	0.339617	0.202454	0.191918	0	0.0862768	0.550895	0.0577332	0.105283	0.0146862	0.0999417	0.289285	0	0.355029	0.771541	0	0.277217	0.00421147	0.193468	0	0.0536367	0.106992
ANGPTL6	0.0632134	0.744677	0.0502839	0.716918	0.0943892	0.249551	0.155135	0.219285	0.259369	0.393705	0.256167	0.155073	0.300762	0.186508	0.11317	0.324328	0.338426	0.816656	0.253587	0.246254	0.199561	0.391726	0.112653	0.146313	0.145483	0.121423	0.193301	0.275568	0.0544874	0.226945	0.349542	0.111567	0.424804	0.338557	0.325619	0.0448769	0.382796	0.239297
ANGPTL7	0.165877	0.52448	0.84409	0.45861	0.102441	0.714837	1.04242	0.71152	2.75646	1.07502	0.469365	0.506943	0.849583	0.560862	0.793737	0.809003	0.753579	0.763913	1.09827	0.430062	0.0299402	0.266218	0.0203309	0.0866658	0.0383921	0.104105	0.0586206	0	0.112601	0.549651	0.32771	0.429317	0.62616	0.585793	0.773637	0.375684	0.780354	0.429311
ANK1	0.211183	0.288867	0.42668	0.30406	0.517456	0.388621	0.183296	0.29568	0.782676	0.46841	0.342225	0.0987905	1.32907	2.89892	0.399037	0.42432	0.309933	0.0976167	0.35207	0.929385	0.0887995	0.205659	0.23327	0.221782	0.356357	0.0514917	0.133689	0.0619574	6.96539	1.86444	0.205827	0.2883	0.876822	1.13404	10.8909	0	0.552009	0.132226
ANK2	1.95698	39.0428	6.42296	3.14109	3.55451	6.74487	6.05444	4.3634	31.7836	10.4049	10.6434	3.40952	8.3882	28.2638	16.3234	9.26811	26.6085	6.94536	26.0036	14.0558	2.39204	10.9193	17.623	14.4174	2.9404	1.28243	1.28936	0.661626	5.73112	11.0225	10.0073	2.9976	25.4268	19.177	17.1971	0.41598	10.5473	8.72834
ANK3	8.03171	4.47284	8.92677	7.03885	7.79895	2.92704	8.06099	6.83904	1.89959	4.45231	7.03764	10.0664	12.3996	4.55445	5.21752	7.14836	5.36223	14.9402	9.48841	8.4467	11.4548	7.3615	5.63919	19.8673	11.3575	10.2317	33.7679	20.7429	15.4324	17.0565	7.55298	4.96133	11.2955	4.41218	10.6253	8.70206	5.5117	7.12738
ANKAR	0.64105	5.01209	1.44631	1.2884	1.44594	0.970283	2.45372	1.50634	8.40319	2.7486	4.53733	1.97192	2.76591	2.37747	5.16371	3.09095	2.78166	5.36957	4.17492	1.36988	0.960311	1.41402	1.45739	1.24594	0.418287	0.755384	0.653522	0.629476	0.810558	0.483296	1.63467	0.86356	1.37979	1.05023	2.12339	0.0181903	1.45141	1.70276
ANKDD1A	0.324944	0.835361	0.116351	0.287302	0.116676	1.05516	0.431479	1.20433	0.80823	0.956097	0.549699	0.24558	0.392348	0.814712	0.0145863	0.344304	0.968101	0.497982	0.86652	2.02582	0.372022	0.428222	0.42387	0.410339	0.331717	0.138757	0.100446	0.05832	0.114818	0.27916	0.396749	0.154841	0.533112	1.12785	0.435341	0.4489	1.04947	0.365146
ANKFN1	0.0838393	0.139715	0.103941	0.070117	0.19352	0.221526	0	0.0146681	0	0.00822457	0.529949	3.2115	0.189463	2.08733	0	7.47637	0.315019	1.00895	0.951269	0.130191	0.348739	0.453717	0.0775255	4.3999	0.0354525	0.0190751	0.0369307	0.0266569	42.8697	2.41399	0.537482	0.0335379	0.315968	0.116657	0.164497	3.32294	0.120234	0.579764
ANKFY1	8.2776	11.006	6.04421	8.24882	7.3438	7.62328	8.38762	9.93213	8.53171	10.6274	9.24717	4.37505	8.46949	6.72806	7.88874	8.99929	9.57896	9.44722	9.81096	12.4625	5.66942	14.2053	6.96365	10.6496	7.24229	15.0917	16.1578	6.49519	9.05213	11.0562	9.36723	7.17725	11.8298	10.4415	9.28447	9.02022	7.30812	8.99698
ANKH	5.70356	5.6581	6.98684	10.6542	4.19213	15.9644	7.38203	18.5843	6.10608	5.22802	5.18988	4.6551	4.13455	12.5967	6.16593	6.24154	10.4255	6.43438	6.24284	12.5767	4.24223	9.26112	7.16543	11.5655	8.53894	5.89816	19.0523	2.30787	3.56522	19.3054	13.9557	5.0159	9.14884	10.6863	7.13018	19.5871	8.67809	8.59355
ANKHD1	12.6859	20.9913	15.003	19.7577	16.904	19.9997	13.0038	29.9381	40.8921	21.1969	26.8254	34.9556	25.037	28.8723	19.9603	29.7559	21.3029	35.1031	41.9485	13.1211	25.6191	17.9361	21.26	16.6986	23.9167	24.8124	13.5663	17.4855	16.8191	14.7478	24.1222	15.3329	17.0741	10.576	20.5509	15.629	27.922	20.9856
ANKHD1-EIF4EBP3	13.7827	20.1487	12.2753	13.1227	12.0455	14.7212	21.344	8.94323	13.6684	21.5948	26.3337	24.9023	24.1338	11.9356	24.9024	11.9558	18.1474	7.99872	17.488	12.001	14.8624	11.0736	8.91287	6.61845	13.0862	15.5266	20.0214	21.2471	19.0654	13.6366	13.4123	17.3217	17.1685	20.496	11.9936	16.7252	16.2979	14.6542
ANKIB1	13.4128	11.5764	8.73848	10.4564	11.1162	12.5412	14.3261	8.98039	13.0638	16.749	7.38084	9.49461	12.658	9.43426	19.5242	14.0466	12.1881	15.5759	13.3528	12.6045	10.0092	13.3567	15.8262	16.0444	20.6614	11.0687	9.86658	14.1535	10.9546	13.013	13.5737	18.7798	10.4903	8.17275	12.9271	8.55401	11.1498	11.0936
ANKK1	0.0547789	0.302707	0.368594	0.644636	0.0835899	0.072949	0.0592373	0	0.473528	0.962547	0.239415	0.241855	0.34661	0.4266	0	0.10808	0.0998693	0.0750123	0.308304	0.177647	0.0595843	0.138343	0.500736	0.110043	0.0890902	0.0725161	0.0829715	0.0506699	0.0356416	0.0292057	0.0183273	0.235319	0.130875	0.46085	0.28247	1.48807	0.0994612	0.0826508
ANKLE1	0.0387271	0.092206	0.0351212	0.0982674	0.034655	0.113943	0.353133	0.319071	0	0	0.0540707	0.0485109	0.173238	0.0049816	0	0.0393724	0.0714192	0.0469345	0.0627657	0.0369904	0.00289629	0.0371646	0.0617031	0.0146715	0.0562511	0.00705017	0.0149002	0.00844518	0.00461823	0.00283641	0.0314532	0.102825	0.0328694	0.250235	0.0805229	0.0857347	0.09321	0.00430075
ANKLE2	18.8405	12.8058	12.7418	12.1268	8.68703	18.2747	16.1171	24.9846	14.2715	10.639	13.4705	7.19306	13.1332	17.7687	10.265	9.27269	12.0649	13.0259	11.7547	9.32309	13.1622	9.79498	9.64465	7.12539	12.9767	11.7353	8.2502	7.09243	7.84021	9.38722	11.634	13.2642	12.6665	15.6492	10.9897	10.769	12.0937	8.94115
ANKMY1	4.03884	4.27855	6.33847	4.88068	1.15904	4.38441	7.13821	3.65012	7.24078	9.31662	5.13759	8.82268	6.13673	7.0672	8.60876	5.95085	3.31173	11.4655	6.41458	4.10559	3.75413	3.04914	1.7001	2.55021	3.0674	4.65507	5.63865	4.94812	2.70773	1.61539	5.00336	8.71692	9.54048	7.81295	7.40262	16.7248	6.85356	6.88861
ANKMY2	3.21559	4.45188	2.48686	3.46513	4.12502	1.84692	1.88622	5.51082	5.24207	3.56637	4.38826	6.19494	4.10417	6.11403	3.16434	3.3768	5.17556	4.64273	6.17535	3.7085	8.65898	4.11055	5.68211	4.43885	5.09112	3.36846	4.6674	7.67725	5.17434	5.90951	4.68293	1.88115	4.28817	2.8142	5.5834	1.20512	3.83992	4.1942
ANKRA2	3.611	8.63286	7.07252	7.18679	10.6244	2.61207	4.51804	4.97435	6.16105	12.0267	9.09217	9.86877	8.02151	3.00677	9.69802	6.84216	6.25344	6.54411	7.07835	5.53487	5.59227	6.02754	5.30943	8.06536	6.59161	14.3705	6.95709	28.3983	8.67583	7.00573	6.93079	5.32623	5.42279	3.1316	6.7814	2.76282	5.66155	7.29251
ANKRD1	0.0262569	0.11617	0	0.281969	0.169049	1.55048	0	0.31218	0	1.38266	0.61999	0.235802	0.0181661	0.0416048	0.0117792	0.122804	0.414987	0.0588476	0.22855	0.0418378	0.176696	0.0316546	0.101285	0.439246	0.227765	0.0418107	0.00420246	0.0190784	0.775502	14.5424	0.923561	0.125358	0.091797	0.398841	0.21493	0	0.364892	0.924823
ANKRD10	18.3612	30.279	22.5104	21.0055	15.2457	18.9646	16.9681	24.1398	24.4217	19.6658	24.0138	22.4787	31.4211	27.2955	12.3067	27.0571	26.2006	33.5043	18.1242	18.6851	10.5945	15.4446	7.96054	8.76806	10.3027	23.1649	11.772	8.25339	10.5497	11.9932	18.2763	12.3899	21.1226	20.6737	21.2773	24.3678	14.4621	14.5683
ANKRD11	19.3195	41.0608	22.3485	24.4162	9.699	135.557	51.8517	60.4541	45.6207	45.8517	36.2566	19.7938	37.4104	85.1817	43.2097	25.3852	41.9227	0	69.9808	40.0527	32.1114	36.0379	36.3747	26.9806	44.6944	17.3623	29.9689	8.67177	28.539	16.6541	36.5251	30.1395	40.1782	70.6462	37.0304	40.8737	60.057	42.4018
ANKRD12	4.21286	13.2841	7.7832	8.66054	7.42041	6.46241	18.3127	6.46954	18.3603	18.2027	16.6676	16.692	7.63209	16.6408	30.531	9.66488	13.9553	14.9782	28.0901	9.44621	6.49254	8.28719	7.96566	8.366	9.46768	6.13163	8.30808	10.161	5.89434	6.16849	15.2566	9.72449	10.6226	6.42598	11.0838	4.08673	7.99508	15.5252
ANKRD13A	8.22359	6.83555	5.92149	6.71245	13.2961	5.07378	12.8915	13.5501	5.15151	7.78659	9.27062	5.58133	8.99206	7.12357	10.1416	7.14035	9.71719	10.8291	12.1868	8.83217	7.93259	9.6789	7.36716	8.52443	16.6193	8.84841	8.24007	5.99784	7.61452	21.1909	11.0879	9.184	8.82191	9.59429	7.93683	6.59176	13.3506	7.52713
ANKRD13B	3.04162	1.58444	1.8955	2.03502	1.13411	2.1321	5.21498	1.4491	1.30226	2.85465	1.29165	2.35151	2.09254	3.90122	0.107209	0.730412	1.54799	2.0354	2.31896	1.59921	1.34603	3.19328	2.04093	1.97508	5.85966	0.87636	1.11125	0.948357	0.529554	0.993022	2.8285	3.7838	3.27525	4.72734	6.24469	1.04361	0.811659	1.68858
ANKRD13C	4.1995	5.77789	3.49606	3.17094	6.09792	4.40539	4.61032	2.08855	2.72783	3.9958	3.73268	6.76456	4.29479	5.89944	10.2337	3.84896	5.39489	5.3331	5.41597	4.69964	3.4843	4.38214	6.68243	5.77521	4.86784	4.01398	4.64491	5.90976	3.01884	4.29738	4.74505	3.67334	5.26425	3.74417	6.55117	2.19854	4.46923	4.6987
ANKRD13D	13.4541	4.99617	6.75532	6.47135	1.83237	6.80968	40.6092	15.063	6.33768	9.07279	7.7695	7.31448	7.74825	6.62052	1.40521	7.22679	5.37667	7.12013	5.51345	5.94277	7.32855	6.16649	7.05305	4.95989	7.96584	5.21638	11.6224	2.53638	5.14582	4.18577	6.10825	14.27	7.29631	8.58898	9.27255	18.3849	6.64711	4.8401
ANKRD16	3.46124	1.78436	2.30888	1.87663	2.65584	1.42705	2.22915	2.34535	1.49956	2.23064	3.64546	2.6115	3.43148	2.59722	2.10548	2.26029	2.13334	3.67898	2.55437	2.635	4.46546	3.09943	2.18335	4.2436	2.57066	4.48943	4.82059	2.54408	3.50464	2.50873	1.5803	1.79231	2.13906	2.94923	2.04835	2.31803	1.53973	2.23985
ANKRD17	55.0795	62.9765	47.006	42.9566	26.6585	35.64	53.1625	43.9575	60.4939	55.2344	68.8245	70.1536	88.8863	54.738	107.687	100.94	71.9571	75.7902	83.4202	51.6679	47.5887	59.6038	54.6981	59.5547	62.8223	62.5238	67.9686	48.8061	42.6906	37.0532	53.742	60.5322	42.3433	26.135	69.0494	13.6001	36.8057	62.2728
ANKRD18A	4.66795	8.02924	1.44206	1.61314	0.494004	2.88475	11.1622	0.247813	0.558976	1.46519	51.851	1.55939	14.0648	4.65024	6.63763	6.24806	3.72765	7.80426	5.02667	1.52333	0.230466	3.45203	5.89399	0.485165	0.166866	3.20313	5.77674	0.0180181	2.12815	0.191526	1.52257	0.467302	1.20979	1.03549	1.25979	3.41589	2.6126	6.46778
ANKRD18B	2.01006	1.38237	0.2932	0.626907	0.0674709	0.509644	4.51824	0.230056	0.0188064	0.0625337	9.4613	0.347891	4.14196	2.62009	1.13065	1.22767	0.77651	1.62655	0.480167	0.653636	0.188121	0.753166	1.2747	0.143033	0.115931	0.701277	1.20301	0.00837311	0.452509	0.171848	0.674151	0.130939	0.259265	1.09446	0.362593	0	0.631639	0.946607
ANKRD18DP	0	0	0	0	0	0	0	0	0.0812288	0	0.00764995	0	0	0	0	0	0	0	0	0	0	0	0	0.00547151	0.0166457	0.00140417	0.00833315	0	0.00387576	0.00476208	0.00958517	0	0.00815627	0.00681514	0.00999089	0	0.00894645	0
ANKRD19P	0.524484	0.432668	0.595517	0.763761	0.266336	0.282974	1.00374	0.308534	0.306355	0.494441	0.49056	0.581688	0.412546	0.567859	0.514097	0.456926	0.560173	0.789644	0.494412	0.504487	0.357947	0.587139	0.380786	0.173519	0.120748	0.357441	0.381276	0.160862	0.218527	0.112291	0.507683	0.327947	0.518183	1.11113	0.529701	0	0.662677	0.580621
ANKRD2	0.00927708	0.205415	0.142288	0.0147592	0.0677021	0.0297105	0	0	0	0.0772993	0.0579569	0	0.0824672	0	0	0.119056	0.0994701	0.150397	0.0862253	0.0449561	0.055484	0.129895	0.044298	0.0234206	0.0416093	0.00915296	0.0177886	0.095344	0.0540947	2.69881	0.0880522	0.109511	0.307826	0.0849732	0.030213	0.328451	0.100268	0.0328535
ANKRD20A1	3.94465	9.79881	6.57595	1.63501	2.94406	2.14414	3.01402	1.04419	5.41132	6.96618	2.7725	15.0329	9.78495	6.87497	4.07804	6.62274	5.2553	12.1148	5.95141	4.07605	1.29314	2.84973	1.71529	1.46026	1.18192	0.800593	1.97577	0.0874207	1.51504	1.54186	4.04914	1.73852	7.23378	1.92195	17.1849	2.94389	2.19781	7.28374
ANKRD20A11P	0.457212	38.2501	0.226882	28.568	4.01076	1.5236	0.0351457	0	21.1068	9.13348	94.7723	4.15843	10.1163	6.64591	12.6453	0.90473	5.91515	23.4618	16.3046	2.34007	12.9331	0.507931	3.01826	1.42807	19.9821	1.53483	1.74853	0.0581671	0.0412997	0.882909	0.569946	1.78743	46.7872	2.72504	228.38	5.4843	2.42359	17.5353
ANKRD20A2	4.49315	7.80698	7.67634	1.85751	2.71817	1.5534	2.7197	0.365652	4.00677	6.16675	2.42439	14.6918	10.006	4.15758	3.35022	6.81374	4.87523	10.974	4.08223	3.32263	1.25616	3.01768	1.45183	1.32036	1.14536	0.88208	2.08636	0.0812296	1.66658	1.62055	3.66067	1.75641	6.5789	1.71901	18.9187	2.37225	2.33844	6.98053
ANKRD20A3	1.80105e-06	2.85935e-06	3.37017e-06	2.72144e-06	2.03813e-06	2.96195e-06	2.87864e-06	0.0226156	3.40557e-06	3.06846e-06	2.4666e-06	0.0246978	2.60034e-06	2.32395e-06	3.46576e-06	2.53408e-06	2.9973e-06	2.89902e-06	0.0119927	1.17303e-06	1.37019e-06	9.89837e-07	1.09248e-06	1.12687e-06	9.76756e-07	1.58328e-06	1.21946e-06	1.41065e-06	1.06551e-06	1.29022e-06	1.32817e-06	0.022998	1.74888e-06	1.4113e-06	1.42311e-06	2.47146e-06	1.87033e-06	0.0197334
ANKRD20A4	4.37432	7.59672	6.44245	2.41236	2.17256	1.84267	3.62721	1.01397	4.29564	10.7321	2.48582	14.7435	10.3125	5.27011	4.02627	7.2226	4.54082	9.26263	3.04642	5.13463	1.66607	3.44174	1.35432	1.19163	1.52954	0.693949	2.00177	0.0618038	1.9296	1.57911	3.8124	2.02294	7.62405	2.37473	15.997	3.31159	2.97279	6.59308
ANKRD20A5P	1.0552	20.2108	3.78328	12.198	1.36769	1.98859	1.36053	2.0717	6.03107	2.94244	70.0714	11.4354	11.8032	6.74759	7.99996	2.45294	4.07451	19.8298	6.64173	3.0695	6.10699	0.836721	7.23051	1.57326	6.55765	4.44895	0.815757	0.548031	0.652327	1.47053	6.9583	0.909898	6.59672	1.27914	42.0485	11.4949	2.23368	4.9921
ANKRD20A8P	0.690456	3.90667	1.03508	0.737542	0.936672	0.547966	0.377173	0.0835389	0.331922	1.61661	3.73275	2.19833	4.71885	6.02364	2.77682	1.67634	2.36546	1.6467	6.83898	0.818159	0.521929	0.518344	0.423084	1.09413	0.288616	0.167772	0.18157	0.0239653	0.261956	0.345568	0.397361	0.304247	3.24338	0.310812	19.7314	0.33873	0.264344	1.43402
ANKRD20A9P	0.0472603	0.652787	0.217345	0.488597	0.0666447	0.151394	0.147259	0.145257	1.03871	0.242418	0.966007	0.34062	0.382013	0.77268	0.431955	0.276015	0.245581	0.508681	0.5247	0.121947	0.22325	0.0422479	0.0802978	0.0423779	0.135526	0.0775265	0.042384	0.0143729	0.0227129	0.0513313	0.194409	0.137985	0.272827	0.0907718	1.02683	0.481708	0.140436	0.478093
ANKRD22	0.992383	0.0784123	0.646996	0.430104	1.99473	0.157125	1.09476	1.17604	0.440421	0.109433	0.53489	0.163859	0.615513	0.810755	0	1.53973	0.394793	0.898153	0.179991	0.283402	1.69254	0.714297	1.18752	0.310389	0.485066	0.340532	0.636664	2.17332	1.24769	2.61805	1.09311	0.8285	0.310078	0.295761	0.551771	0.00404507	0.625037	0.340774
ANKRD23	0.8573	0.915379	0.690053	0.867594	0.400172	0.741769	2.30269	2.58296	1.38979	1.67113	0.929899	1.01308	1.73948	5.21984	0.053194	1.21948	0.728812	1.74221	1.1607	1.33248	0.849918	0.654188	0.695299	0.442288	0.805153	0.637572	0.414405	0.213625	0.642783	5.37941	0.981001	2.31174	1.83526	1.93702	2.25379	7.79836	1.444	0.721105
ANKRD24	0.140618	0.478944	1.04601	0.26526	0.198263	0.280697	0.256907	0.101136	0.860657	0.770494	2.20138	1.3816	0.540116	1.59576	1.51908	0.298302	0.282535	1.63699	0.550542	0.280226	0.130321	0.709508	0.397981	0.169865	0.136548	0.422988	0.492264	0.546695	0.34624	0.199128	0.350648	0.227046	0.616196	0.838804	0.555122	1.54024	0.252169	0.551451
ANKRD26	8.57058	15.13	12.3238	17.2401	10.4857	10.8342	9.93977	10.2154	18.564	21.9327	31.6786	31.7777	15.0428	16.5778	56.0832	14.7315	16.0009	25.411	17.9697	10.8619	15.1645	7.21558	12.7438	9.10789	13.7592	11.5804	9.20554	10.7198	5.53964	5.06091	13.238	10.3807	13.2895	5.60746	8.53965	15.5466	7.40376	20.1431
ANKRD26P1	0	0	0	0	0	0	0.0059659	0	0	0	0	0.00319198	0.0250576	0	0	0.00867167	0.0199984	0	0.0295538	0	0.00443689	0	0	0	0.0342005	0	0	0	0	0.00144589	0	0.00504833	0.00187994	0	0.00920964	0	0.00199739	0.00220973
ANKRD26P3	0	0.00564981	0	0.00991459	0	0	0.0056842	0	0	0	0.0124623	0.000924448	0.00464526	0	0.0121	0	0.00556813	0	0.00897292	0.00422219	0	0	0.00247799	0	0.000308632	0	0	0.00048698	0	0.000127763	0	0.0312466	0.00391822	0	0	0	0.00666499	0.00105408
ANKRD27	8.82261	6.59936	6.03651	6.00409	6.91163	13.2055	7.76913	13.1501	7.27172	5.51564	5.89265	2.87289	9.52427	7.23174	7.13317	7.58078	6.27893	10.359	6.56094	8.92718	4.75102	5.29405	7.41207	5.79177	5.83126	4.58819	3.63917	4.05813	10.1531	8.00373	5.97031	9.99927	6.41299	8.30628	9.36058	3.54211	6.41434	7.21352
ANKRD28	13.3738	11.2997	11.9239	8.10779	8.74565	7.27523	13.2479	7.48073	11.8053	7.82653	18.7773	5.1005	10.3014	12.5951	21.2038	11.0906	15.5233	17.2388	14.1674	11.1411	6.66059	18.5941	14.2268	8.52586	6.3638	18.4532	13.7536	9.90761	8.42785	12.8882	10.4155	13.4961	9.90392	12.0764	13.4132	3.46544	10.1363	14.7728
ANKRD29	0.247456	3.29479	0.729021	0.133643	0.648381	0.42004	0.320961	0.798884	1.12274	0.671482	0.397707	2.34485	2.18087	2.11383	0.26365	0.885012	2.22344	0.887626	3.35385	4.28391	0.26608	0.995694	2.00859	1.2498	0.264222	0.655109	5.21412	0.188002	0.129082	0.610519	0.372346	1.33424	1.34764	1.09083	2.73768	0.659478	0.836181	0.950054
ANKRD30A	34.096	58.3568	1510.09	2254.9	518.581	32.1725	7.77479	26.8721	41.4688	2409.16	0	0	379.657	72.9291	1603.17	367.847	1256.58	2849.34	900.3	337.843	548.493	165.559	949.521	209.827	0.308786	999.264	260.943	0.0657638	0.00891452	137.784	766.054	1224	410.34	118.022	32.1208	0	0	298.387
ANKRD30B	22.2881	63.4111	11.7008	84.4699	49.2493	0.191436	0.504014	8.72954	2.44346	32.2223	284.551	284.053	10.0431	23.0034	7.12518	24.5873	11.9963	68.3127	2.12289	19.3844	10.3216	5.61819	21.7339	9.93237	87.6405	335.89	7.99077	25.5673	2.68047	12.7646	134.791	3.07062	3.32605	0.558818	9.65807	140.77	49.0964	33.4915
ANKRD30BL	1.45714	9.97736	8.84063	5.66909	54.0115	6.30983	9.14022	8.83529	2.13479	5.46851	4.44901	3.07421	9.15619	4.83274	0.723019	4.98674	17.0095	1.6757	0.0754113	30.5762	13.1101	8.89594	6.14112	8.21232	4.142	12.7573	5.6056	7.7531	7.46032	7.43223	3.86508	16.3932	4.73762	0.38357	10.2434	0	12.996	2.17118
ANKRD30BP2	0	0.0162267	0.0304502	0.284529	0.0182807	0.011488	0.0164162	0.00230442	0.0186435	0.0671725	0.362861	0.0827181	0.0300447	0.0514582	0.083641	0.00542589	0.0203559	0.133406	0.0220905	0.0127362	0.00803556	0.0051675	0.0344026	0.00645198	0.00550086	0.0491023	0.00493183	0.00426192	0.0021654	0.0148815	0.0594099	0.187967	0.0294886	0.0032855	0.0224152	0.0607855	0.245055	0.0170512
ANKRD31	0.0662205	0.384622	0.0587007	0.286068	0.22879	0.175099	0.584508	0.161677	0.249539	0.521002	0.875877	0.322838	0.672411	0.359899	0.549231	0.574915	0.287499	1.74656	0.583451	0.196655	0.244655	0.186578	0.396323	0.420716	0.466902	0.363572	0.20105	0.300566	0.951947	0.337752	0.204202	0.205018	0.18695	0.227948	0.232078	0	0.134026	0.157126
ANKRD32	2.026	2.59173	2.68994	3.82321	5.84153	1.60684	6.42996	3.02432	4.55683	5.52606	3.30481	2.98117	3.65766	4.46179	8.8019	5.9874	3.03863	4.53044	3.76239	3.19157	3.92249	2.16636	3.71442	2.05504	3.85494	3.79906	2.38964	3.92442	2.55164	2.79202	3.282	3.7988	3.39097	1.61619	4.50325	0.600789	5.68744	3.32981
ANKRD33	0	0.186074	0	0	0	0.0237648	0.434248	0	0	0	0	0	0.0711453	0	0	0.0317198	0.0122281	0.0694436	0.0492059	0.0127009	0	0	0.0175185	0.00419304	0.0185876	0	0	0	0	0	0	0	0.0123809	0.949273	0	0	0	0
ANKRD33B	0.0141176	0.160286	0.089443	0.0540378	0.0458944	0.120779	0.0407975	0.0510588	0.0178075	0.0984521	0.0361125	0.0125934	0.0452998	0.130626	0	0.047018	0.134402	0.0118237	0.124092	0.0653215	0.0470411	0.134153	0.0512216	0.0637612	0.0479567	0.0350582	0.037917	0.00559966	0.0321187	0.0740988	0.0725083	0.081418	0.094241	0.125794	0.0539595	0.0271672	0.120895	0.0991969
ANKRD34A	0.0445415	0.153185	0.0186789	0.138256	0.0268231	0.269284	0.0359293	0.548371	0.234781	0.0976002	0.0615083	0.787805	0.0959557	0.282762	0.00624772	0.0946934	0.138037	0.296542	0.157559	0.0906465	0.025625	0.0365035	0.0263317	0.0713936	0.0554926	0.062378	0.0175814	0.0572864	0.100092	0.23329	0.103851	0.0579985	0.106832	0.267801	0.0951662	0.706882	0.141118	0.209584
ANKRD34B	0.0782778	0	0.0854567	0.0140504	0	0.143714	0.0610648	0.91207	0	0.0843507	0	0.00436681	0.0526731	0.0970587	0	0.0824447	0.0420844	0	0.00847775	0.00398659	0.00936721	0.00500111	0.00368962	0.126536	0.00524507	0	0.00200872	0	0.00746631	0.0618797	0.0139	0.00505402	0.00296221	0.00495036	0	0	0	0
ANKRD34C	0	0.0368858	0.0040933	0	0.0300637	0	0	0	0	0	0	0	0.0441348	0	0	0	0	0	0	0.00142628	0	0	0	0.00566095	0	0.00204038	0	0	0	0.00655673	0.0216105	0	0	0.00177846	0	0.13559	0.00452323	0
ANKRD35	0.014779	0.841707	0.160957	0.171047	0.235556	0.477433	0.221113	1.06868	0.0758374	0.957761	0.33314	0.118334	0.454824	0.256897	0.874641	0.252609	0.718909	0.341746	0.838819	1.19746	0.52778	1.27406	0.71487	0.685881	0.165108	0.171523	0.135062	0.0349152	0.381104	0.606073	0.734745	0.148747	0.795036	0.396258	0.464132	0.0433501	0.69707	0.587095
ANKRD36	51.6597	198.622	137.538	204.966	59.2302	95.8228	91.7893	113.046	283.29	156.647	219.547	100.079	150.949	162.619	72.3459	184.675	152.109	255.821	213.744	83.7111	61.8389	81.2049	57.4616	57.6014	157.105	30.7716	18.4447	13.5964	16.4682	10.5804	121.832	86.1623	158.454	73.2702	172.819	69.5609	166.906	185.104
ANKRD36B	38.2737	141.348	105.585	149.71	40.47	80.5409	72.8493	108.82	228.938	112.377	164.736	70.6781	123.769	115.817	65.9185	134.758	118.878	212.32	178.579	60.8198	48.8747	61.8337	40.0588	42.5465	118.514	21.2792	16.0482	10.349	13.3243	8.85489	99.4982	76.7872	115.91	64.9693	136.755	45.5816	122.72	130.022
ANKRD36BP1	12.583	18.2732	15.0174	17.4334	16.6668	26.5493	4.6522	8.85991	17.9143	12.0628	17.1934	19.4559	14.9438	12.288	8.79991	39.5708	18.9268	7.27644	13.7406	14.7791	7.22492	11.5824	10.6597	11.5553	7.68262	5.84636	9.66941	3.7932	8.56951	9.58755	13.8587	5.48197	9.06622	3.61184	10.323	3.65869	12.8915	20.4729
ANKRD36BP2	9.72748	21.3411	28.6409	46.8328	25.987	11.6382	3.43565	5.9129	17.1974	14.0141	13.6726	73.9427	11.5313	10.0884	5.28641	9.55923	11.7523	7.91661	21.3751	6.34671	9.91341	18.1931	3.71081	26.2093	20.2615	11.521	3.2298	15.3572	8.86702	3.70434	4.02147	29.1864	9.41321	6.43039	10.648	2.42005	10.9449	14.1632
ANKRD37	1.53712	1.90849	1.08353	0.905889	0.33483	0.98096	0.421499	2.12712	0.577478	1.29306	0.423319	1.73399	0.482576	0.795833	0	0.613002	0.61042	0.150592	0.755431	0.712019	0.668035	0.726681	1.78432	0.336414	0.627001	0.44192	1.66776	0.842212	0.272047	1.34589	0.98633	0.661705	1.59092	1.70549	0.862966	0.285937	1.67058	0.569876
ANKRD39	10.3808	7.95222	5.67315	5.95862	4.03705	4.98352	5.51759	8.05931	8.35227	5.46429	4.07407	4.83262	7.62643	7.9696	5.12375	3.55557	3.2526	2.46084	4.72867	5.30063	5.56473	3.72378	4.13489	3.42996	4.21406	4.43237	5.95616	6.94579	4.3272	4.01278	2.79632	6.27453	5.32211	7.00798	8.0228	26.0568	4.25655	3.40731
ANKRD40	11.9921	9.25602	5.73696	5.66769	3.43059	8.33478	7.83277	8.2998	5.41709	7.06903	7.57069	8.3577	8.04736	8.3791	8.02727	5.94297	6.58654	6.33266	9.77095	9.2491	5.55917	6.57548	9.50163	10.6561	9.69393	7.39557	7.60722	6.4134	6.87103	4.83896	6.58659	6.21044	6.63977	5.7498	8.18544	5.1564	6.478	4.65204
ANKRD42	5.00925	3.49405	3.98712	3.76382	3.71483	1.15803	2.84323	2.42975	5.47037	4.92264	8.50414	8.53528	1.98081	3.39256	8.0088	3.13827	3.78164	2.70173	4.24903	2.73147	6.76049	5.83082	7.22247	3.0853	2.26094	9.58107	6.16509	7.47334	4.01589	3.52544	3.37254	3.05102	3.77959	3.87495	3.2154	4.26979	2.68165	7.54955
ANKRD44	5.49682	16.1075	12.3322	11.8388	24.3359	7.23592	8.09424	9.16346	31.9486	15.0885	15.975	6.95778	9.9003	33.3702	8.64864	19.7468	21.3191	22.649	16.778	15.3447	4.67192	8.39323	8.48658	8.89473	11.705	5.73045	7.00465	6.0605	14.0824	4.65328	10.3797	10.0967	14.3232	21.9628	16.628	11.3699	16.8562	8.33808
ANKRD45	0.00472344	0.0981243	0	0.042199	0.0158555	0.146216	0.00703197	0.00596301	0.00803208	0.104037	0.101667	0.00655888	0.0592345	0	0	0.0205207	0.0631971	0.0071243	0.120883	0.13238	0.0565169	0.0781892	0.0614308	0.0357866	0.0554452	0.00429899	0.00302734	0.0240311	0.174653	0.0380816	0.0521878	0.0227224	0.0576973	0.0445014	0.126857	0.00611957	0.042494	0.0470766
ANKRD46	9.66007	2.24495	2.57914	1.45672	1.83342	2.54634	3.71003	3.59217	1.44877	1.74638	1.46808	3.11312	3.95147	3.21436	0.320107	1.10861	1.34834	3.86151	2.19641	3.33612	2.35614	1.54644	3.35703	4.55291	3.30198	3.48146	1.56107	2.54	2.77783	2.36852	1.85823	6.31295	1.84754	3.7631	6.57739	4.68561	1.6716	1.93625
ANKRD49	2.16436	3.08859	1.95682	2.99128	2.30898	1.65522	2.74719	1.6386	4.60068	2.33023	4.89725	4.6944	2.21796	4.69291	1.26026	2.63089	2.34954	4.19739	3.83693	1.76259	1.3069	1.71293	3.19468	2.15502	1.80003	3.08136	1.67386	1.51304	2.94152	2.23581	3.20472	2.62123	3.14099	2.13035	4.02476	2.49821	4.63112	2.3577
ANKRD5	5.75269	1.47932	1.89966	3.30574	2.6049	2.10983	2.625	1.16926	1.44758	5.50427	4.23147	5.12841	3.39694	3.23912	3.89679	3.08416	1.61654	2.83552	2.25385	1.40345	6.03452	1.91061	4.26101	2.9167	3.79406	3.46916	5.62446	3.76618	3.13374	3.61522	2.19868	8.14227	2.04998	1.31844	2.58446	1.72172	1.8756	2.86597
ANKRD50	5.94128	10.0611	9.61839	12.3142	4.91394	5.76696	8.47533	9.42658	8.44569	13.0236	3.70327	4.67807	14.2473	9.68075	18.8438	14.9702	10.9106	13.7282	8.23603	6.26499	8.8699	9.00524	5.61284	16.0391	7.71355	8.20513	3.00291	12.1356	2.60337	13.1418	14.0494	15.2827	7.409	4.89787	24.4992	2.63021	7.43537	14.8888
ANKRD52	15.9501	4.96026	2.76689	4.4036	3.24027	5.06882	7.53648	3.92898	3.52674	5.30911	3.34402	3.09212	7.80851	4.36876	2.98586	3.38048	3.48945	3.43294	3.93974	4.14539	5.49889	4.98382	4.87369	2.70303	5.21796	4.38163	4.31791	3.50934	3.99558	3.73599	4.3242	4.33823	4.26069	6.17444	6.02961	6.22866	3.85202	3.75275
ANKRD53	0.376722	1.41764	1.68939	0.35604	0.196356	0.525541	0.134654	0.170761	0.655459	0.11151	0.368157	0.493661	0.723554	2.2678	0.0350395	0.366132	0.845147	0.145624	2.16438	0.965109	0.0909254	0.562488	0.724407	1.08673	0.130791	0.17231	0.182882	0.0352797	0.144825	0.244922	0.313215	0.0898456	0.786389	0.739038	0.444979	0	0.314962	0.419108
ANKRD54	2.70296	0.962967	1.37778	0.809808	1.72404	2.51595	1.29739	0.746327	0.228231	0.826915	1.69707	1.34275	1.07143	2.38043	0.231708	1.26519	0.920101	0.569611	1.26822	2.4797	2.24911	3.02432	1.94276	1.30928	2.89131	2.27013	4.74029	3.12388	2.78329	1.96367	1.40046	1.42317	1.9217	1.89233	1.47037	2.4258	1.17756	1.10277
ANKRD55	0.0101448	0	0.0915354	0.00754528	0.0624403	0.148556	0.113083	0.00639301	0	0.326673	0.0962356	0.0985145	0.359985	0.538021	0	0.051358	0.118647	0.0992805	0.00682477	0.0387756	0.0227591	0.048786	0.0515958	0.0960739	0.141798	0.0092328	0.0588881	0.0888104	0.0332793	0.00393758	0.0177298	0.109647	0.118977	0.349931	0.0194329	0	0.0405093	0.0504964
ANKRD6	1.22182	2.65422	1.76304	1.3422	0.77835	1.21392	0.740005	0.939623	1.61352	2.41319	1.47449	0.686453	2.26191	1.87922	3.95798	1.39442	2.19169	2.91636	3.01984	2.36798	1.41406	3.38216	1.26996	2.232	0.951197	0.339572	0.335046	0.380027	3.98472	1.64008	2.35947	1.13156	2.03936	1.55267	2.87069	1.73809	2.00276	1.57312
ANKRD62P1-PARP4P3	0	0.330523	0.154287	0.0127808	0.398809	0.013931	0.665804	0.258162	2.26646	0.160994	0.923481	0.54852	0.770567	0.489552	0	14.5288	0.459351	1.30239	1.7667	0.204852	0.6886	0.112065	0.990057	0.0931391	0.00486467	0.0473778	0.0055501	0.43285	0.456028	0.185114	2.91513	0.212277	0.986549	0.0871185	0.127762	0.0109842	0.504333	0.426971
ANKRD63	0	0	0	0	0	0	0.0880837	0	0	0	0	0	0.0830457	0.0150783	0	0	0	0	0	0	0	0	0	0.00773681	0	0	0	0	0	0	0	0	0	0	0.0273599	0	0.047657	0
ANKRD65	0.365634	0.470236	0.447944	0.0957444	0.127325	0.335124	0.0713266	0.332591	0.514522	0.174011	0.351622	0.939153	0.25673	0.224429	0.202295	0.0929396	0.345248	0.0526453	0.34142	0.866966	0.389698	0.624044	0.181866	0.374506	0.0641974	0.0212981	0.0831943	0.0297632	0.0616088	0.114473	0.115736	0.0280181	0.400832	0.539716	0.0859614	0.28852	0.308382	0.195566
ANKRD7	0.0801717	0	0.0708539	0	0	0.0960139	0.0145495	0.913292	0.115802	0.21556	0	0	0.0684417	0	0	0.0285083	0.0165099	0.0147145	0.0796523	0.063949	0	0.0648523	0.0599103	0.0505968	0.022485	0.00911474	0.0128049	0	0.0418941	0.0147556	0.0290937	0	0.101289	0	0.0601805	0	0.0589158	0.0218128
ANKRD9	0.0407502	0.251091	0.145183	0.168252	0.100441	0.249017	0.716223	0.799842	0.217507	0.467173	0.214545	0.639082	0.112103	0.297058	0.0580327	0.104991	0.121482	0.0120798	0.195475	0.378107	0.262009	0.293446	0.266912	0.205771	0.150674	0.593154	0.745418	0.485478	0.0900004	0.473259	0.148649	0.199739	0.339639	0.630613	0.104808	1.2518	0.691597	0.178482
ANKS1A	8.28119	8.22039	5.31488	5.83653	3.30321	8.37525	6.40051	5.82405	7.78248	5.63312	8.99932	6.78677	9.5934	8.21083	3.22668	8.68026	7.79826	7.32935	10.8979	8.87324	8.14973	8.33982	3.84051	5.85023	7.23065	7.47215	8.51182	4.44021	5.43107	5.64313	6.5428	9.45022	8.34687	9.99667	10.6255	6.61278	8.18883	6.68148
ANKS1B	7.98972	6.55224	7.89011	16.1011	8.69237	1.39011	11.7787	3.59762	7.00773	21.4377	46.8942	20.2835	16.9236	13.0902	14.7711	15.1083	5.71446	26.3035	10.4287	3.88223	17.0983	8.92917	5.47632	0.952587	7.78789	28.5232	1.86245	4.33858	4.00059	2.42927	8.35852	3.01629	5.62345	10.2089	20.5455	3.5616	10.3365	13.346
ANKS3	2.25272	3.22554	4.95618	3.5746	1.28646	3.55328	5.11971	5.706	3.38687	5.23043	2.92214	4.34936	4.41965	4.93122	3.15724	2.96288	2.62727	6.7653	2.76655	3.73148	2.87749	3.78861	1.07836	1.0417	2.49801	6.18193	1.50307	1.10405	1.69209	1.64016	3.64014	3.00271	5.61882	5.07393	4.40785	16.7092	4.06495	3.18686
ANKS4B	0	0.123434	0.00781252	0.0128662	0.120697	0.0246464	0.000804642	0.0272923	0.00367765	0.0204055	0	0.00685601	0.015056	0.0110753	0.00783318	0.00625811	0.0072257	0.00652258	0.0607889	0.00549671	0.0193637	0.0345392	0.00254892	0	0.00241153	0	0.0279418	0	0.0107043	0	0.00350052	0.00519865	0.00947788	0.0316778	0.000552846	0.0366309	0.0241551	0.060136
ANKS6	0.698183	0.978348	0.231564	0.2609	0.220527	1.74581	0.282803	0.254888	0.933789	0.449258	0.269295	0.0920927	0.817788	0.865086	0.0837809	1.01675	0.893384	0.604648	0.917457	0.58804	0.112899	0.661762	0.359597	0.400442	0.201327	0.122839	0.0519769	0.0134889	0.528615	0.384667	0.47985	0.291657	0.788266	0.514467	0.356531	0.166921	0.511648	0.464085
ANKUB1	0.00513229	0	0	0	0	0	0	0	0.0261212	0	0	0	0	0	0	0	0	0.363062	0	0	0	0	0	0	0.00286955	0	0	0	0	0	0.015104	0.00456436	0	0	0	0	0.00512227	0
ANKZF1	6.86016	9.41104	6.59213	5.93788	4.44426	6.54423	8.00865	6.19832	6.75782	6.66796	8.48531	9.53102	5.99846	6.31688	11.4905	6.63761	5.2829	9.43074	7.99843	6.61633	5.96429	6.08548	3.23834	4.21506	8.67768	7.65337	7.25184	5.8901	5.86497	4.59505	5.99032	10.4507	9.96357	8.01193	17.3074	15.5687	10.9247	5.44334
ANLN	18.726	0.390405	1.65347	4.10526	3.14076	17.9305	20.9106	7.38512	1.56953	1.65594	2.16007	0.407785	5.56309	1.50303	4.2121	8.31282	3.65875	10.5263	1.26422	0.968175	5.2998	0.475329	6.02325	5.65819	5.80762	2.0749	8.44721	2.48926	0.66245	4.72502	6.26454	6.65004	5.01756	0.874651	2.51051	1.61353	3.21859	3.77033
ANO1	25.5178	20.0189	14.2761	19.3997	7.29887	58.5681	36.9487	26.977	35.9058	10.4294	13.8832	85.9402	30.4292	22.9655	18.4216	11.7737	11.5757	21.742	37.1336	32.5151	22.7307	38.2997	53.713	20.9391	12.0803	8.41239	5.9549	14.8596	13.671	21.9649	18.5248	20.7662	54.5727	32.4635	52.3255	16.2647	23.7271	56.5507
ANO10	13.0361	14.6544	11.0717	14.3067	30.785	11.3254	18.9543	9.11337	11.0204	13.9081	12.5052	9.59482	18.9185	13.0381	11.2739	15.1352	14.1908	21.0042	17.1419	22.0193	15.9137	23.6109	22.2373	22.301	14.7416	20.477	16.7935	35.5141	27.4171	25.7989	17.5796	11.5387	12.1383	8.99551	8.0717	4.92238	18.228	14.4748
ANO2	0.369008	3.84093	1.12415	0.442313	0.565105	0.838594	1.3453	1.25899	0.92883	1.84791	1.06223	0.574605	1.45297	3.3713	2.89914	1.67857	1.67465	1.25315	3.48128	3.77298	0.729323	1.1615	2.49835	1.79896	0.653495	0.184599	0.893504	0.432588	0.358724	0.82016	1.2685	0.53617	2.08659	1.4967	1.84753	1.60713	1.03901	0.629329
ANO3	1.61897	0.993444	0.470237	0.0122532	0	0.0705758	0.0492639	0	0.207997	0.351151	0.08337	1.7649	0.724249	0.718909	0.359955	0.080565	0.282147	0.109282	1.2037	0.719757	0.0320681	0.101969	0.152417	0.988854	0.0489842	0.436808	0.023591	0.0178131	0.0924708	3.96239	0.100003	0.6288	0.364821	0.059996	0.122	0	0.086826	0.0480457
ANO4	0.052218	0.316198	0	0.0312558	0	0.0195763	0.0179184	0	0.333104	0.340681	0.0531617	0.525599	0.133932	0.21214	0	0.0782457	0.140429	0.0771998	0.218239	0.243133	0.113818	0.16041	0.15642	0.180881	0.0399837	0.0108654	5.59112	0.0694166	0.20295	0.104823	0.0956558	0.0409643	0.268348	0.0660882	0.0668884	0.988415	0.126286	0.0631465
ANO5	1.57913	1.23062	0.202364	0.141583	0.117558	0.0896344	0.136865	0	0.520497	0.183637	4.75423	1.16254	3.91874	0.502573	2.77363	1.47739	0.195776	0.0194369	0.995774	0.761499	0.0284848	0.187856	0.538632	0.783997	0.1234	0.0214641	0.353926	0.0461609	1.73353	1.4609	0.950669	0.326623	0.988776	0.204725	0.671805	0.896895	0.086152	1.08356
ANO6	32.9937	70.537	37.8374	40.912	38.8434	32.365	49.9624	45.0508	46.1493	39.2114	49.1154	48.7916	36.2417	32.5403	60.1328	45.9412	57.3464	28.4654	77.158	63.9297	23.4003	56.6999	74.9865	133.044	42.1366	67.538	22.4942	27.7042	38.8073	79.665	58.2534	24.6894	44.7967	32.0561	34.4932	18.6537	43.0765	43.0256
ANO7	0.0446675	0.63557	0.0867482	0.00891227	0	0.0732671	0.120708	0.352529	0	0	0.00757926	0.234308	0.649351	0.0654396	0.321113	0.124397	0.0400418	0.376164	0.0726001	0.0170605	0.0156964	0.076079	0.0105236	0.0639323	0.00498781	0.285914	0.0401297	0.0108243	0.0876093	0.0196143	0.53782	0.135232	0.364289	0.0376891	0.0965037	0	0.703018	5.57087
ANO8	3.16108	3.09696	2.93182	6.66182	1.57207	3.98599	5.05282	7.38909	4.96202	6.2806	4.18785	4.21658	5.51179	2.56757	2.85837	3.20402	2.81099	8.14521	2.48568	3.21622	2.51478	4.38416	2.25403	2.36239	4.11463	2.41558	3.58915	1.79888	2.23511	2.24629	5.63247	2.03429	6.35822	4.49801	3.62667	12.6701	2.85057	3.07935
ANO9	3.61872	1.25161	2.44138	3.81922	1.13789	1.68783	1.82274	4.00206	3.04957	4.43675	2.73863	3.70107	3.64223	4.07676	1.24367	3.08863	1.36658	5.11855	1.91896	1.87656	1.72037	3.34265	1.29444	2.5108	0.808054	3.8539	4.11073	1.3643	2.59527	1.54542	4.1204	10.0418	4.5768	5.07626	4.39689	3.84832	2.38132	1.97622
ANP32A	84.1859	38.5983	50.5709	44.9185	49.119	111.152	55.0442	136.243	61.6614	56.1819	70.993	93.8241	75.6241	93.957	59.9304	111.705	54.5909	43.7498	74.8624	96.8514	216.97	85.898	122.801	130.604	138.389	166.397	127.691	125.765	145.035	90.0629	107.681	103.457	106.225	77.3317	58.3433	170.85	110.761	133.074
ANP32A-IT1	0	0.0508071	0.0412881	0.0294436	0	0.00620121	0.0198505	0.0192365	0.0583521	0.0299602	0.0192601	0.0527982	0.0318203	0.0536883	0.055222	0.0771379	0.00635987	0.132724	0.071731	0.0193198	0.00283643	0.0121303	0	0	0.00847465	0.00345224	0.00486428	0.00275689	0	0	0.0588188	0.0427352	0.0250451	0.0279028	0.0555115	0.0551783	0.0608739	0.0898762
ANP32AP1	17.0347	17.8998	13.1027	14.8397	11.7113	27.0561	9.48154	29.1683	20.1519	17.1134	19.2788	23.8053	13.4478	18.8395	1.72114	23.5663	13.0449	22.8896	3.97972	22.8975	25.3262	18.5451	19.7457	18.9324	17.7222	25.5285	16.713	17.4269	21.397	12.8337	20.3059	19.4556	22.8292	11.9461	13.4914	0.175264	23.6349	22.8728
ANP32B	244.53	89.6292	119.004	107.093	92.0345	625.957	277.447	830.322	228.739	195.553	153.275	240.161	167.549	394.426	263.011	197.656	156.606	128.083	260.301	158.566	309.905	136.916	240.211	187.164	299.688	164.317	258.928	292.417	241.495	132.853	314.502	574.876	492.534	561.475	319.135	1257.13	298.876	379.872
ANP32C	0.263174	0.0949369	0.888237	0.375468	0.0680711	2.70174	0.515408	7.99105	0.489211	0.236818	0.943933	0.683913	2.2757	4.04104	1.67543	1.4308	0.366006	0	0.201647	0.311324	0.368299	0.312621	0.208216	0.205928	0.204753	0.205187	0.489583	0.0611564	0.196569	0.243257	0.421093	0.975855	0.623424	1.11085	0.371833	0	0.656322	0.521208
ANP32D	0.018529	0.776008	0	0	0	0.454856	0	0.0990001	0	0	0.315279	0.225825	0.422113	0	0	0.498175	0.243492	4.25216	2.00327	0.0771533	0.00688947	0.097368	0	0.0349155	0.160254	0.111435	0.00691624	0	0.0391713	0	0.215088	0.0534451	0	0.795275	0.475111	0.0552659	0.325579	0.737839
ANP32E	22.6692	9.44289	16.6714	21.7554	8.70425	8.54831	10.2784	100.502	27.1495	19.7629	8.57322	12.196	14.1802	30.3294	28.9487	6.28219	13.726	12.2608	17.7937	17.4429	20.0024	13.2055	15.0004	23.9051	6.2765	12.4054	14.4376	13.6941	16.1089	11.4963	31.3822	26.9237	33.1612	26.0909	19.9287	61.0246	28.8855	38.5613
ANPEP	3.75466	10.8744	3.8309	3.30237	440.614	8.02436	2.4016	7.8053	15.927	9.40253	8.26567	0.991766	15.0016	7.70536	8.60311	6.21652	16.5723	3.18564	18.6263	6.35803	92.1051	9.77966	8.01657	20.1519	4.28463	153.955	9.51395	183.408	4.15568	4.54998	11.6278	5.72074	8.43176	13.9062	4.89514	34.1412	7.25871	6.56987
ANTXR1	110.602	179.618	177.282	212.98	54.7557	154.731	61.262	106.516	100.415	80.9394	91.2421	28.6666	95.3706	92.0385	113.425	88.8426	224.592	115.352	155.009	121.371	115.833	261.92	82.1793	187.214	150.523	100.753	44.5256	14.8854	134.978	343.907	570.546	78.8886	126.604	84.5668	102.416	67.6363	258.887	237.669
ANTXR2	3.07316	13.8297	9.1269	4.72422	8.56324	6.16418	1.69476	6.06062	4.4591	6.70122	4.63667	4.16103	7.11393	6.64653	6.12792	9.0802	15.0833	9.32517	13.7085	15.0938	4.13681	9.81276	13.2991	13.8059	7.79571	1.9543	5.79964	3.54514	6.2565	7.6311	11.8935	4.28813	12.5176	12.7836	8.15158	2.21697	9.28514	9.19522
ANTXRL	0	0.0803185	0.0434256	0.0537655	0.236685	0.156676	0.134048	0.530509	0	0.510153	0.319992	0.0334317	0.0502511	0.130544	0	0.217715	0.080518	0.0995482	0.356519	0.0615907	0	0.00323353	0.00358095	0.022881	0.0304154	0.0219878	0.00773704	0	0.0216229	0.00886465	0.00886613	0.154144	0.0507982	0.0424443	0.0691468	0	0.0300408	0.106567
ANXA1	50.6563	199.436	66.976	53.78	122.15	210.528	28.9676	48.3555	86.3583	61.0593	81.4549	27.384	49.4732	112.203	54.4691	73.844	225.208	50.7723	204.462	384.005	62.9926	143.5	512.276	313.973	79.4448	37.7286	25.6868	28.0492	55.7559	185.613	160.086	42.6205	177.111	141	97.805	13.8508	103.542	88.0791
ANXA10	0	1.30574	0	0.0410358	0.0208623	0	0.0813411	0	0	0.101758	0.16278	0.0127629	0.140203	0	0	0.530763	0.061452	0.301703	0.0988466	0.14843	0.0556578	0.14535	0.033331	0.0117474	0.0417419	0.0338609	0.0356893	0.00675938	0.0166706	0.0342365	0.0541431	0.124491	0	0.00716593	0.0210193	0.0234667	0	0.21319
ANXA11	27.9502	27.5665	24.3569	23.8711	39.7005	28.6429	26.8738	28.263	15.6279	20.3433	31.5039	21.4869	22.6207	37.0299	14.9155	24.1817	33.2179	21.819	31.3483	62.2532	44.6109	39.3918	58.3931	103.548	16.144	45.2628	84.7479	40.7509	56.421	62.4842	28.687	23.6689	36.3778	41.1273	20.8655	81.4118	26.6346	27.5482
ANXA13	0.063979	0.0244587	0	0	0	0.0585706	0	0.0113009	0	0	0.0913944	0.0125387	0.175352	0.115201	0	0.0130375	0.0301884	0.148273	0.121408	0.229751	0.143487	0.451431	0.00993748	0.115372	0.0204944	0.0455285	0.0393106	0.0132763	0.158561	0.107579	0.00664905	0	0.0590026	0	0.0332124	0	0.12579	0.0897791
ANXA2	222.147	157.394	144.734	145.543	210.044	415.635	113.565	157.326	101.231	85.2988	166.174	75.4712	121.563	153.757	45.3129	171.173	239.774	94.4537	274.588	556.755	563.438	413.655	750.291	427.317	151.258	407.132	243.325	297.941	482.034	735.388	322.313	170.488	201.767	162.313	136.505	85.3118	207.784	256.957
ANXA2P1	0.0507134	0.775656	0.555481	0.297949	0.147836	0.760108	0.132454	0.0312102	1.47242	0.545126	0.244399	0.471863	0.581601	1.10078	1.46584	0.635489	0.593585	1.12633	0.752129	0.189097	0.0227456	0.0820645	0.0269558	0.103341	0.0199613	0.119923	0.0129588	0.00969828	0.00242298	0.0584976	0.41537	0.0888386	0.389578	0.173033	0.373868	0	0.442895	0.368951
ANXA2P2	1.86876	1.01466	2.3101	0.645626	1.12485	2.9068	1.58441	0.77549	0.392746	2.61514	1.29437	0.83266	1.44739	2.91125	1.20037	2.49334	1.94858	0.975472	8.19742	2.70918	2.98666	2.71271	6.01991	3.21151	1.0692	3.29129	2.06997	2.44011	3.37994	14.3227	3.53935	1.87707	2.19615	1.25895	1.74248	3.85686	1.24886	2.37484
ANXA2P3	0	0.218005	0.505961	0.0433716	0.00565168	0.00431112	0.0170717	0	0.0194099	0.0223681	0	0	0.0826052	0.0125413	0.00888702	0.00901178	0	0.0565807	0	0.00428898	0	0.00181249	0.0111423	0.00593842	0.0113105	0.00611298	0.0257627	0.000945703	0.00100349	0.00927814	0.176354	0.0160747	0.00926112	0.0693372	0.0314276	0	0.00592566	0.0810769
ANXA3	0.991662	6.10702	6.3787	2.81546	18.2725	3.43922	1.90818	9.51733	2.99299	6.32173	3.61579	5.1744	2.7952	2.06991	2.72756	14.0866	7.74942	6.70375	18.7367	20.9999	5.17139	23.763	4.35342	31.2552	0.739236	3.22835	0.283432	23.9717	10.0484	43.8449	4.95609	0.343333	5.51665	1.33143	1.50622	0.509622	9.94498	5.65273
ANXA4	24.7464	17.4929	15.1545	12.4188	26.9855	27.9797	15.467	17.4766	15.9957	14.3421	12.8051	15.2531	17.8398	12.6119	9.68637	24.7012	17.7632	14.6832	22.5236	36.5325	26.2441	52.7241	38.7234	36.376	45.6141	46.059	43.2359	39.3596	32.9775	63.5709	32.9636	22.8664	31.8013	24.6176	25.0762	11.4488	16.4356	20.182
ANXA5	193.523	169.798	124.971	102.295	149.556	301.693	95.6809	107.549	129.657	97.4422	130.211	86.9448	123.563	115.547	95.1429	157.39	203.321	86.8565	172.386	384.244	189.338	290.457	611.217	320.153	271.546	217.3	343.399	212.979	222.452	450.137	219.481	92.4669	212.529	166.865	180.279	70.9108	187.189	154.301
ANXA6	64.2527	74.5584	53.5417	53.0568	78.8809	69.935	31.7655	72.9484	26.0019	36.3382	57.1552	32.5936	66.1228	54.4007	38.8666	74.81	67.5614	55.7154	87.5884	153.704	60.6723	113.509	170.573	168.435	87.8155	110.759	217.242	70.5706	148.609	186.506	97.1876	102.44	98.3587	79.8973	132.889	56.2625	69.3776	81.0227
ANXA7	54.6626	23.215	25.6465	22.4747	66.4865	25.1332	36.0215	18.4017	20.568	22.0724	33.4685	37.1194	26.1987	27.7729	27.9591	27.6049	33.14	26.2354	43.278	57.7159	78.2698	66.9349	91.9168	82.7968	67.1672	87.4916	84.6014	128.158	67.8165	113.026	42.5918	37.5995	34.0376	26.7049	43.9611	15.5375	28.1924	36.1742
ANXA8	2.87083e-05	4.22331e-05	5.13482e-05	4.16844e-05	3.11435e-05	0.551041	4.12932e-05	3.59576e-05	5.04494e-05	4.45607e-05	3.72057e-05	3.87843e-05	4.188e-05	0.956707	5.15684e-05	0.204109	0.567473	4.40477e-05	3.84389e-05	3.2718	0.742908	0.493056	1.66577e-05	0.712975	1.57327e-05	0.269457	0.11686	2.02987e-05	1.74589	0.100877	0.624981	2.28603e-05	0.267252	0.0376686	0.287465	3.69993e-05	0.0579507	0.485975
ANXA8L1	0.63017	3.67489	0.630963	1.36353	6.21388	26.4256	0.00485322	0.443425	1.63485	1.72885	2.3959	0.678659	2.24505	2.25019	0.245476	1.57135	3.55679	3.76172	2.40132	38.9514	6.25974	9.86891	0.171196	1.64275	0.0678853	0.28307	0.12257	0.116416	8.2654	1.50085	10.6236	2.12918	4.30576	2.40647	1.84702	0.045072	2.93062	3.02828
ANXA8L2	0.823046	3.43423	1.94214	1.25771	6.06949	39.4228	0.0931256	0.324456	1.58676	3.00307	2.76323	0.755488	2.53466	4.12045	0.142717	2.18489	4.11035	3.16051	4.38703	41.8252	8.32417	11.0569	0.201676	2.91935	0.0770869	0.61551	0.261626	0.101185	10.472	1.7848	14.9235	2.33916	5.09172	3.87382	2.91218	0.0820543	3.83888	3.88808
ANXA9	33.2832	0.442936	3.96032	3.98377	1.24382	0.277571	0.811854	3.68416	3.7975	4.00265	7.31414	1.47263	10.2384	0.660892	3.61482	13.1201	1.77312	3.91705	2.94014	3.01014	10.3235	11.7937	18.3631	2.22305	0.336969	10.1766	11.2895	21.7341	84.0633	10.5931	7.31228	16.7721	9.41495	5.16639	3.84773	7.24558	2.08631	5.91903
AOAH	5.17556	15.438	10.5408	8.37155	19.5839	4.80261	9.46133	10.2255	22.1909	6.20614	7.4861	3.97758	3.88226	16.4667	1.82744	9.14773	15.6926	7.30698	9.00329	27.2645	5.69432	4.05634	8.1114	10.2315	13.1851	4.15512	9.48976	11.5149	7.47916	7.61401	3.91406	6.35343	8.26029	14.6771	10.3335	0.572288	9.32409	4.17496
AOC2	0.210475	0.89285	0.936996	0.394971	0.0383389	0.526591	1.838	1.40156	1.05468	0.700222	0.657371	0.289281	0.989317	1.03938	0	0.614891	0.375257	0.501581	0.765292	1.22806	0.070817	0.252839	1.41551	0.530521	0.182635	0.120663	0.0546236	0.119292	0.143045	0.101096	0.415012	0.787614	0.850237	0.762035	0.61399	3.37981	0.596355	0.388019
AOC3	3.02408	26.6162	5.08113	1.58511	3.238	3.02078	2.14068	2.99789	8.42898	4.90286	3.48578	2.72766	6.09823	14.5705	1.69823	5.31539	7.74345	2.97712	22.9911	55.4448	3.95523	10.426	48.6247	37.4543	3.62373	1.06053	1.72926	1.98507	1.14745	6.45508	4.53358	3.41398	17.3925	14.2355	7.60398	1.87677	6.60114	2.94353
AOC4	0.0621993	2.23123	0.368612	0.106054	0.104453	0.0352657	0.243637	0.0428834	0.180912	0.0631782	0.129373	0.0903177	0.286543	1.03335	0.391332	0.363438	0.626663	0.139647	1.75871	1.10922	0.118598	0.230475	0.513451	0.621711	0.0748234	0.0282996	0.0418201	0.0225983	0.0129882	0.184102	0.264157	0.0644314	0.90884	0.919502	0.266399	1.01028	0.290564	0.0753938
AOX1	1.00153	8.5183	2.2245	1.01171	62.375	3.41375	0.911813	1.09811	8.26358	5.66785	2.06438	0.532082	2.28336	1.70217	2.29296	5.31233	8.87044	4.06783	12.7618	4.29994	3.52412	3.09156	5.61919	5.48191	6.3617	0.601106	0.690382	1.29091	1.89107	4.51451	5.0446	1.07668	6.82727	5.97733	4.02287	1.17247	2.6753	3.0791
AOX2P	0	0	0	0	0	0	0	0	0	0	0.0126225	0	0	0	0	0	0	0	0.0044777	0	0	0	0	0	0	0	0.00212287	0	0	0	0.0171315	0	0	0	0	0	0.00041575	0
AP1AR	4.26327	2.044	2.62311	3.37879	1.83325	1.63695	6.60864	2.36909	1.55086	3.61597	4.0273	5.51957	4.13062	1.53008	8.10152	3.90582	2.15376	3.57385	3.04173	2.38059	4.9613	2.88922	3.80775	3.62741	3.54915	7.69452	5.72357	6.06635	2.07352	4.23186	3.65155	7.97465	2.41144	1.42108	2.30654	0.302005	1.47379	4.3663
AP1B1	36.6992	15.3121	14.6052	17.7476	30.3227	27.0932	36.4338	22.0201	26.0042	14.8712	18.2891	13.4466	20.8085	22.9336	5.52486	18.9403	19.5553	17.6245	17.7293	41.3051	30.5233	21.8541	31.3057	21.5886	34.7064	21.5589	41.1469	28.3622	33.6969	25.0662	25.4531	41.7254	24.1889	33.5537	23.3088	30.2182	17.521	17.3927
AP1B1P1	0	0	0	0	0	0	0.281374	0.0434165	0	0	0.0222859	0.0245032	0	0	0	0	0.0589253	0	0.0236331	0.0351352	0.0136721	0	0	0	0.0137625	0	0.0116341	0.0132744	0.0219062	0	0.0139485	0	0.0162539	0	0	0	0.0521825	0
AP1G1	12.2015	13.5345	8.3642	7.35707	11.2229	18.1837	8.21596	10.1795	11.9431	9.47574	16.1623	8.85357	15.3107	15.9166	14.4852	11.2172	12.2954	9.89176	15.2987	9.72699	12.6654	15.2114	16.2473	12.2778	11.886	15.7989	22.5373	22.9381	20.9189	21.054	12.6681	10.0078	10.2401	10.101	14.6799	2.88147	18.5026	12.5967
AP1G2	17.7945	8.06439	12.621	15.1932	11.9263	6.88412	15.7154	28.6664	16.9822	20.3054	14.0642	15.2062	22.3325	26.5677	14.9555	14.8238	9.40187	21.0997	8.13198	9.75446	12.5913	14.765	4.37677	10.7453	11.4951	21.8717	22.5839	7.29472	17.1973	16.3778	13.5185	22.4932	16.2531	19.1391	22.4643	18.8834	14.488	12.5303
AP1M1	10.323	8.40393	9.77734	8.13831	9.09088	11.8885	4.72147	7.49712	3.40981	4.85466	5.09328	4.8331	5.86607	5.48992	4.01452	7.01972	6.92242	3.82262	6.5434	15.1085	7.18682	11.6318	13.1158	12.5544	12.7815	9.46041	11.6695	14.0807	10.6713	11.85	7.85596	5.34327	8.74598	7.12092	10.0693	2.29707	7.61475	4.43044
AP1M2	31.107	2.70129	8.96154	11.4222	25.9808	4.14668	13.4813	9.22302	5.12214	8.20296	13.2141	14.3449	17.6097	3.25371	10.4738	14.1036	4.09381	9.37878	3.64475	6.69859	26.6388	23.2656	31.4604	23.0409	39.8093	36.6666	62.9755	62.5732	44.8642	29.5077	12.2393	10.1413	11.7203	5.70222	12.6449	11.5724	12.9293	11.4137
AP1S1	24.0612	4.53519	10.3758	8.72504	18.809	15.4012	9.3307	20.4625	5.12836	9.29283	3.86569	10.4519	14.2111	6.07788	6.83636	10.2125	5.99425	4.40807	3.22671	9.60644	14.867	8.70105	16.4617	12.4316	18.4916	12.1517	13.7413	26.6576	13.5514	19.9546	10.372	30.1163	7.93061	11.3471	15.9566	18.851	7.79801	8.77833
AP1S2	13.7842	5.57742	4.01111	6.41428	8.9995	4.66481	4.36059	1.4848	0.710313	3.52216	2.96764	2.70214	4.99682	3.299	9.25096	4.84615	8.07733	4.11817	14.2773	16.6261	4.82052	4.91632	11.6142	10.4543	10.3078	5.28722	6.34087	5.17798	3.59927	9.85187	8.19453	5.0237	5.02095	5.07417	4.53173	14.6905	4.50396	5.49133
AP1S3	0.963053	0.195065	0.656643	0.518027	0.488458	0.211831	1.26364	1.00849	0.339261	0.769176	0.422235	0.497732	0.485243	0.534215	0.38774	0.985592	0.661634	0.971237	0.52169	0.385778	0.354308	0.443206	0.395063	0.945958	0.565091	1.16706	0.921634	2.24973	0.66658	1.13251	0.81463	0.372979	0.565482	0.474562	0.704907	1.30475	0.693642	0.464686
AP2A1	57.4872	17.5418	15.6058	19.4443	17.2344	29.2063	17.9745	18.4787	18.1508	29.861	15.0348	14.2878	21.8586	19.6326	8.89067	15.6136	17.322	20.4823	14.6646	20.8097	21.0183	23.7628	23.667	23.8898	19.3475	17.7802	19.2045	24.0543	20.448	19.9973	16.6665	28.3289	18.9072	48.7133	17.2285	16.114	16.1346	15.5843
AP2A2	16.5448	14.5337	12.6348	13.0935	11.5598	14.1501	11.3716	11.6688	15.3688	15.6553	14.9619	12.0902	12.6804	15.861	5.36023	14.9156	16.6197	15.196	15.5935	14.9985	13.8204	13.4185	16.3258	13.8274	10.7235	11.7727	16.7673	9.7163	14.6013	13.2829	19.7185	18.7212	17.6725	19.7829	14.3733	15.1029	9.18926	11.6914
AP2B1	78.4684	19.9103	30.6883	30.1441	45.6265	21.4102	39.1577	30.4561	22.6199	26.549	48.2404	23.2964	40.2971	26.5333	21.026	124.161	23.9696	33.6186	23.5903	29.7057	27.3895	63.722	78.0219	94.7618	54.8352	42.0224	43.7625	80.8745	40.559	46.0413	34.7982	33.0331	27.9902	22.85	43.486	15.9968	20.5265	27.0259
AP2M1	119.406	38.7752	38.5978	36.2906	57.3695	89.8154	38.6278	81.5317	36.6508	31.3856	37.3639	36.4447	39.682	45.3911	26.3996	36.923	46.7351	31.9267	36.5603	79.4869	94.8768	94.6563	159.427	88.0112	75.525	76.7786	83.3845	68.237	80.5694	99.2344	58.9387	61.6774	41.6119	36.5284	42.0873	28.9858	48.9842	48.8247
AP2S1	52.6321	10.3123	12.7212	12.8466	29.7885	31.6067	38.3138	22.769	16.214	11.5418	12.1629	13.8266	28.6079	14.0684	6.88404	17.7816	17.7237	19.2516	10.1981	25.8397	57.5408	20.2367	37.185	22.5844	41.1218	39.9495	39.3757	23.496	33.8194	41.6361	24.0434	32.5942	20.9278	20.2585	20.3528	38.1481	24.4115	18.407
AP3B1	38.8824	40.0626	31.1553	42.3806	53.6431	33.1082	32.8311	32.3021	42.3059	34.327	41.4988	29.9326	41.0903	33.2112	41.7334	43.5422	48.9629	41.2547	51.7194	42.6436	53.9951	47.2089	54.7864	40.911	57.9279	39.7001	44.9651	75.0485	55.3718	57.3436	48.3863	45.6779	42.9985	36.0108	40.0753	20.9089	43.0079	50.6473
AP3B2	0.143436	0.14421	0.783789	0.0448793	0.828168	0.825025	0	0.296728	2.30983	0.396085	1.26512	3.04547	0.897143	8.58558	0.194735	0.150464	0.459285	0.258437	1.06506	0.524555	0.587775	1.26142	1.02047	0.70982	0.00931432	0.273287	0.0492137	3.90171	0.932684	0.200246	0.182531	0.411549	0.7851	1.10917	4.73218	0.318142	0.345269	0.278792
AP3D1	29.1567	21.1865	21.7643	21.9861	20.7851	27.5499	28.5199	26.6268	16.445	26.5894	30.9637	25.277	38.4618	21.0879	21.8157	22.1414	24.1055	19.0714	23.2573	26.2144	38.8607	29.9919	35.8361	20.6302	63.1944	38.6441	50.7881	36.9478	24.7561	29.0149	18.0338	19.3053	27.2355	32.0689	32.5622	27.4536	25.4325	23.4947
AP3M1	12.8627	6.08148	6.74895	6.8617	8.35837	5.44773	10.4807	4.50211	5.40349	5.28475	7.71518	9.6663	9.56564	8.23684	11.1422	11.2524	8.11262	8.44137	10.3304	7.66015	15.8537	6.48504	16.1122	18.0907	15.5815	16.1303	13.2813	16.9858	11.3524	11.7824	8.28225	9.99542	6.85882	4.95902	11.1669	2.08484	4.46566	8.06602
AP3M2	4.4246	2.05838	2.42273	2.92983	2.03148	3.77371	3.01893	10.0259	2.23106	3.54173	2.67883	2.66498	3.88252	4.10122	2.28732	1.50057	2.72127	2.4927	3.01767	1.78274	4.37033	2.28579	1.83265	1.77671	3.75526	2.34922	1.64434	3.22641	3.2829	3.68882	3.65102	5.08416	2.43193	2.53266	5.78036	2.80596	3.20878	2.20698
AP3S1	32.3444	20.3576	20.7703	29.7164	43.6961	17.8643	33.7169	11.7821	25.6155	32.0585	14.959	23.6897	38.8173	9.39527	14.122	25.5895	28.5198	18.2423	23.111	15.9346	21.1141	38.0269	46.5206	30.8778	53.9914	29.7817	10.0823	17.6312	18.2507	29.6441	55.0957	41.6187	18.4843	12.5527	12.156	1.43742	15.559	32.474
AP3S2	9.33782	0.855433	0.57717	0.894557	3.46733	1.62655	1.13948	1.34457	1.54924	2.10011	2.23795	1.55352	1.28224	1.95597	0.128305	1.99513	1.98616	0.230224	1.22398	2.53186	3.43745	2.46666	3.90905	4.51244	5.06053	4.25618	2.2592	5.46891	4.81074	4.13043	1.42142	2.62572	1.7823	0.784645	1.23626	0.365862	1.37446	1.11277
AP4B1	6.04027	8.56705	9.13799	9.80201	7.43603	7.96593	5.30816	8.57607	8.41031	7.68704	4.78464	5.04554	5.72937	12.036	5.44358	5.14615	7.29091	6.62131	8.79737	6.00051	3.84906	6.01342	4.19302	2.82844	4.22142	4.21122	4.66531	6.07995	2.63289	3.28987	6.87639	5.64269	8.20887	4.65	6.75162	8.14319	6.6617	4.85776
AP4E1	6.04179	4.33189	1.86787	2.96937	4.42551	2.78644	3.13627	4.61074	3.55863	2.60038	3.77141	2.4389	4.34682	3.17576	5.62528	4.13973	3.57924	2.10463	2.76731	3.69867	2.31493	2.64583	3.6593	3.73673	2.31911	2.13782	2.68216	2.15814	2.2519	2.37923	3.09295	4.33627	1.94715	2.18057	2.7861	0.949274	3.00304	2.87895
AP4M1	33.6687	10.4411	22.8839	20.6884	16.1363	16.5572	25.0552	18.0855	11.5046	22.9402	9.84754	19.9098	17.1982	13.0705	5.66029	16.5324	9.01517	14.1077	8.19353	14.7229	18.0439	24.1	15.6952	14.582	19.2437	19.397	18.809	35.8989	9.13556	20.2984	18.7584	37.2816	23.242	20.7054	17.4095	38.2363	13.6367	13.6295
AP4S1	0.356051	2.19493	1.71474	0.405922	1.24981	0.492951	0.444174	0.933666	0.31348	0.474347	1.22199	0.801084	1.06666	1.49768	0.230983	0.663796	1.12424	0.566901	1.17435	0.966986	0.72248	1.25897	0.756836	0.732963	0.869845	0.615672	0.76355	0.524962	0.791037	1.44083	0.927086	0.760684	0.78956	0.306756	0.79511	0.441959	0.933719	0.667683
AP5B1	1.03358	1.52872	1.84345	1.42475	0.671815	1.36342	5.17383	3.96532	2.41733	2.892	1.12893	1.17746	3.21935	5.52213	2.81417	1.57524	1.78937	3.12033	1.24402	2.31231	0.620503	1.23619	0.736685	0.976389	0.997041	1.49296	1.42727	0.432825	0.510951	0.770417	1.22793	2.20564	1.34853	2.48133	1.29162	5.46692	1.85154	1.06607
APAF1	4.98686	6.91346	4.66378	7.56388	10.2011	4.75421	5.84568	3.40095	10.1962	6.48115	5.2103	6.0626	7.20957	5.89869	9.92917	6.32527	5.53053	6.88588	5.80455	4.79891	4.99667	4.04104	4.79428	5.56952	5.74871	3.38826	3.27787	4.2315	2.54375	4.96728	5.69609	4.61511	5.01431	4.13178	4.4432	2.04446	3.90944	5.4696
APBA1	0.214674	0.585557	0.255136	0.0771318	0.139455	0.909868	0.119108	0.173785	1.03411	0.0584977	0.175717	0.285056	0.19129	0.26017	0.131564	0.110028	0.470317	0.205068	0.680937	0.707531	0.255932	0.350835	0.40214	0.218994	1.86083	0.0801869	3.58817	0.142752	6.89252	0.328681	0.205743	0.199505	0.356096	0.440498	0.37198	1.37413	0.346791	0.203099
APBA2	0.642464	3.78547	2.93191	3.58901	1.95671	11.132	1.22632	1.6023	2.79683	4.13215	1.76485	0.0957962	2.44261	5.908	0.93385	1.2141	1.99506	4.00814	1.8177	1.27368	0.989738	1.86619	0.374905	1.36736	0.80628	0.612861	0.306459	0.0699642	1.9543	1.47515	4.99558	0.978022	1.19187	7.07989	1.30079	2.82298	3.53284	1.42588
APBA3	1.46417	2.57713	4.61205	3.59438	3.69118	3.42631	2.44007	1.82278	2.75394	4.51637	2.19257	3.21244	2.27833	2.1574	0.0214274	3.13285	2.43022	1.98935	1.96451	2.4425	1.62446	2.44006	2.43407	1.45414	3.13649	3.60719	3.43448	3.37788	1.73632	3.24019	1.78691	2.15555	2.53133	3.43986	3.3896	8.95575	2.75957	2.41433
APBB1	4.36123	7.4568	5.51664	3.84922	3.15205	3.39422	0.685563	5.07766	9.39961	4.11189	8.71225	5.17023	2.75413	3.96444	8.00052	2.52122	4.67028	5.30912	6.99543	7.37481	5.27753	9.02825	12.387	7.7719	2.20543	11.1605	9.97624	3.06804	3.01249	5.40691	7.07286	2.94231	7.00839	4.73925	5.02509	11.024	4.35753	6.08638
APBB1IP	9.78862	15.6229	11.8192	13.1109	20.8744	6.24808	15.8795	9.75884	21.2791	9.23426	9.05792	4.40141	6.79132	19.5957	9.92036	15.1706	17.5055	6.9832	13.9882	29.4915	7.70333	5.58307	25.9019	18.3534	18.5809	5.37848	9.57745	11.9976	8.70574	8.15413	13.0632	10.9994	10.2747	14.6106	10.1735	3.80802	11.3192	8.22404
APBB2	10.981	24.4168	10.026	17.482	8.57924	10.8894	31.3341	6.93221	30.3297	24.4451	45.5594	17.5033	24.3031	16.8846	30.2647	15.4132	20.8349	33.0556	21.0575	14.5232	19.6767	20.1523	14.2478	15.4062	9.96825	42.0344	14.5886	12.7916	27.7131	12.6842	24.0923	20.2868	16.6249	12.0282	22.1204	8.76114	17.5634	31.0673
APBB3	1.69801	8.98693	10.1297	6.17445	1.86595	7.05314	6.50799	13.8537	6.46783	8.75807	6.03781	5.89972	6.37132	13.5094	6.37354	6.98973	5.24104	6.44517	5.54124	3.76247	2.85726	5.53511	2.65606	1.54894	2.33084	3.10973	2.04206	5.54234	2.91977	1.68832	5.47406	4.36944	8.16536	9.10835	4.73351	15.3079	7.00355	4.01193
APC	9.0632	20.542	9.14457	13.9748	12.0771	10.9943	13.8087	9.70744	15.7171	16.8283	16.9529	16.1898	18.6349	15.1488	34.6109	20.0701	19.5328	16.0357	23.3123	14.6015	17.4413	12.716	16.0831	14.7708	17.103	13.21	11.655	10.4195	13.205	12.524	16.7667	11.1579	13.0551	8.24849	17.2608	7.6177	15.2723	17.6865
APC2	0.00942459	0.120293	0.101592	0.0549334	0.0473242	0.118694	0.0963463	0.384207	0.0960902	0.258058	0.0427043	0.0528595	0.096508	0.226106	0.0891084	0.0414474	0.0656847	0.13212	0.0433312	0.0509639	0.00264368	0.0224987	0.03249	0.013392	0.0144534	0.0117997	0.0151334	0.00771016	0.00491358	0.0180788	0.0271705	0.0383425	0.0932887	0.16342	0.931404	0.219901	0.0835609	0.0343225
APCDD1	1.72903	11.3392	5.22696	3.47712	1.99562	5.15484	0.866929	1.32079	7.71054	3.6648	2.56906	0.411339	3.98226	4.52974	2.2346	1.26532	6.85318	3.76604	11.9292	8.84582	7.12253	9.181	9.96012	12.4446	0.811951	1.33532	0.829433	0.739615	3.88036	3.4005	12.0988	1.44834	3.99755	2.77834	1.84062	1.07384	6.12809	3.67364
APCDD1L	0.0641865	0.089503	0.225431	0.0598546	0.0314128	0.314582	0.0479421	0.752071	0.172377	0.183621	0.122155	0.0223255	0.0448398	0.159849	0	0.0524129	0.0403375	0.248991	0.211214	0.0281009	0.0330019	0.0342293	0.00947195	0.0202637	0.00896534	0.0839845	0.0128612	0.002916	0	0.0940327	0.0740204	0.0419362	0.170142	0.287492	0.0339628	0.0156593	0.164859	0.133995
APCS	0	0	0.217522	0	0.141552	0	0	0	0	0	0	0	0	0	0	0.0219765	0.12766	0	0	0	0.176505	0.248954	0	0	0.00886691	0.0286254	0.0300792	0.0114269	0.659318	0	0	0	0	0	0	0	0	0.0336502
APEH	44.0716	8.65903	17.9014	21.952	46.7363	19.8868	35.5199	19.6265	9.84917	12.4014	22.2043	20.4903	25.108	16.305	8.04165	18.3167	11.1714	12.7378	11.6362	23.3439	28.8816	32.6221	21.6378	20.4781	48.6174	45.2793	53.9958	47.1146	40.9017	47.2418	20.1345	20.6558	21.9189	21.0791	10.7651	50.8204	20.2488	19.958
APEX1	102.627	46.0706	60.6086	61.2352	120.499	81.8305	95.6811	78.5125	117.552	87.9857	103.182	75.1412	87.9662	112.269	81.7506	107.625	81.4527	80.7901	63.3318	64.2159	147.499	74.6174	56.2553	85.6677	167.071	121.226	115.859	146.226	129.518	169.236	116.011	183.907	79.4666	64.8889	109.515	51.6995	97.8798	97.7897
APEX2	13.3555	2.20362	2.49145	3.32953	3.73484	3.44577	6.34428	7.32433	2.29401	2.46429	2.25306	3.68514	3.49126	2.4341	1.8581	1.56555	2.18055	1.68423	2.29931	3.41241	6.8012	4.74717	4.42565	2.80895	14.3141	5.69463	3.84723	4.96637	4.19164	7.10023	2.96783	14.1945	3.14657	2.68014	4.12692	2.72924	3.49984	3.42393
APH1A	38.9201	9.54963	28.5945	23.6375	47.4146	21.9842	15.6078	27.5388	6.17552	13.4077	19.6726	31.5601	24.3953	16.2571	9.67557	29.6134	12.9649	11.4186	11.5244	33.8805	23.9507	39.093	28.9885	22.9209	31.1192	29.9209	28.9064	30.2909	37.5638	37.7085	19.1141	20.4443	19.2455	17.1836	19.0353	22.8643	18.6949	20.5342
APH1B	0.922803	0.69096	1.18435	0.416524	1.35942	0.192237	0.269229	0.708702	0.664342	0.724875	1.80926	1.86871	0.831251	1.33336	0.589122	0.8836	0.877545	0.321099	0.636027	1.18378	1.30443	1.04858	1.54455	1.43099	0.474972	1.99039	2.75676	2.7073	2.37389	1.77771	0.670344	0.400913	0.747365	0.554783	0.793006	0.682965	0.661003	0.748218
API5	21.4201	12.002	9.74938	11.7334	15.1865	15.7104	12.3856	12.267	8.2298	13.9563	14.2025	15.2727	13.0804	9.00665	24.9197	14.8583	12.6888	10.6331	15.9413	13.2454	14.3581	15.5685	25.9501	17.5931	26.6722	20.7094	18.0426	16.9528	20.7858	20.5294	16.3105	19.3626	10.8574	7.59183	17.3495	3.82199	9.16357	15.1372
APIP	11.253	9.92944	6.51484	7.87149	8.65525	4.66827	8.87627	2.99348	9.63645	7.78873	8.11256	8.06745	9.05954	6.12685	6.8793	5.89606	6.61922	10.8151	9.60083	12.3538	9.78924	7.16712	16.0776	12.649	23.571	10.388	15.3385	8.9812	7.93495	10.0249	6.94189	9.33343	5.12942	5.64209	10.0674	4.42897	3.5273	7.83314
APITD1	7.19727	1.51464	1.35288	1.72411	1.4168	1.56335	6.44444	2.06877	2.22259	2.31913	2.55939	3.16586	2.50942	4.60395	9.93147	1.62878	1.76932	2.32202	2.38021	2.00547	4.87608	1.7555	5.38436	3.50485	5.02374	5.81351	6.14314	6.37658	3.25622	2.09831	3.74873	4.90137	2.24582	1.5741	1.74818	0.502296	1.23845	2.75076
APITD1-CORT	0.350234	0.160133	0.36818	0.0669827	0.027012	0.403502	1.13305	0.317545	0.129627	0.632844	0.13923	0.310498	0.40841	0.250293	0.000555569	0.191783	0.0618761	0.329913	0.154052	0.0630455	0.346493	0.0328831	0.00985867	0.0561082	0.459422	0.388081	0.351515	0.301899	0.184863	0.0651256	0.255122	0.448671	0.288057	0.182676	0.415038	0.515451	0.324584	3.37981e-07
APLF	0.522352	3.96689	2.85622	1.639	2.51932	2.73085	2.2972	1.2184	4.30949	4.90905	1.1819	0.773036	2.60939	1.85354	12.5429	2.01061	4.85538	3.52697	6.3022	3.68041	2.30089	2.61591	2.38695	2.74389	1.63559	1.92244	0.330981	0.556789	3.85748	2.40599	1.90119	1.59269	2.30491	1.79553	1.39579	0.00419015	1.54011	2.87121
APLN	0.370923	0.120745	1.45072	1.21689	0.38897	2.02738	0.444751	2.43415	0.0198075	0	0.416867	2.24255	0.405106	1.25253	0	1.40857	1.00407	0	0.177432	0.371511	0.546138	0.195691	0.606478	0.290315	0.897939	1.18522	0.314662	0.536439	1.72324	1.01309	3.75437	0.233164	0.324305	0.581545	2.0948	1.14727	0.91836	0.527789
APLNR	2.81226	2.04853	0.826179	0.553755	2.68547	3.39898	0.758861	0.85223	2.15697	1.18743	0.815619	1.07955	2.91934	2.99556	1.05406	2.05607	2.21013	0.568505	0.822598	8.0733	2.42748	1.92266	5.10342	3.68556	3.5521	0.905603	1.83865	1.19393	1.25948	2.95721	1.60033	0.696006	1.25105	0.779982	1.43347	0.119764	1.38515	0.721954
APLP1	4.79719	0.66137	0.608536	0.362746	0.35434	3.02997	0.0693558	0.92856	0.0351944	1.19805	1.11584	3.53424	7.63096	4.15617	0.00937483	0.427762	0.199291	0.0858676	0.33514	0.776881	0.442542	1.61447	1.05674	0.907654	0.516673	0.269257	0.522222	1.00356	0.458222	1.04186	0.775212	0.818366	1.19756	1.88323	3.90622	1.85102	0.30044	0.298088
APLP2	119.004	54.4146	66.581	54.3626	97.728	82.842	111.87	120.339	56.6875	58.7906	113.407	94.3125	133.447	89.1697	31.6847	33.8103	84.2643	32.5721	98.3266	173.528	97.8437	160.145	150.782	121.158	106.278	0	196.651	187.812	0	152.264	89.4866	42.2161	90.1475	137.641	78.2668	0	87.8142	68.8983
APOA1	0.28051	0.0471172	0.511254	0.0713141	0.500709	0	0	0	0	0	0.0201957	0.155385	0.0880289	0	0	0.0459393	0	0	0.0428505	0.0738705	0.308216	3.00556	0	0.187351	0.167315	0.914709	0.409531	4.645	5.17233	0.146571	0.0705901	0.06308	0.679053	0.419304	0	0	0.0631432	0.0527605
APOA1BP	97.956	17.5671	41.9944	40.4276	76.6135	47.3142	50.4646	33.5633	16.713	38.8656	41.1483	70.0104	63.885	26.6432	23.2896	62.0109	23.5566	25.8279	29.3929	44.7285	72.3013	40.957	68.3618	39.288	73.6831	69.193	120.406	113.982	148.857	90.5881	57.9969	58.242	45.0795	29.5576	48.5987	91.6405	31.2656	56.4689
APOA2	0.0816165	0	0	0	1.84926	0	0.310642	0	0	0	0.0932727	0	0.0499979	0.130957	0	0.578482	0.247363	0	0.148027	0	3.19339	3.70468	0	0.333868	0.420318	1.95757	0.179179	0.117981	14.2481	0.0924892	0.51845	0.142373	0.365426	0.471767	0	0.0434542	0.250805	0.0807133
APOA4	0	0	0	0	0	0	0	0	0	0	0	0	0	0	0	0	0	0	0.0122334	0.405475	0.00688631	0.00496008	0.0219896	0	0	0.025137	0.0235515	0.0669052	0.951507	0	0.00670062	0	0	0	0	0	0	0
APOA5	0	0.0100353	0	0	0.00762602	0	0	0	0	0.0318589	0.00857025	0	0	0	0	0	0	0	0.00911261	0	0.00509195	0.0548022	0.0161848	0.00429896	0	0.00619661	0.00872258	0.0784285	0.183016	0.11009	0	0	0.0126903	0	0	0.0435952	0.00675368	0
APOB	0.0160067	1.46786	0.0386996	0.0279058	0.0931865	0.0376188	0.0191699	0.0502723	0.0146489	0.0512659	0.032367	0.0815833	0.171568	0.606101	0.0389235	0.223793	0.313452	0.229487	0.710019	0.926028	0.408997	0.54312	0.130909	2.31446	0.0380464	0.291512	0.0920069	0.116405	2.3603	0.0855498	0.0897143	0.0933571	1.41668	0.324873	0.0716303	0.00111759	0.158131	0.143653
APOBEC1	0	0	0	0	0	0	0	0	0	0	0	0	0	0	0	0	0	0	0	0	0	0.00907344	0	0.0209639	0	0	0	0	0	0	0	0	0.00167169	0	0	0	0.0635631	0.00118032
APOBEC2	0.12968	1.27249	0.0866447	0.764999	0	0.39108	1.00926	0.241699	0.283973	0.13815	0.482381	0.970172	0.769368	1.33479	0.0144313	0.3829	0.778661	0.348459	0.648076	0.103371	0.0424172	0.0783943	0.014477	0.046043	0.0454054	0.140097	0.0259203	0.0117756	0.00967592	3.57438	0.289779	0.269169	0.240233	0.520617	0.459919	0	0.463928	0.417177
APOBEC3A	0.991948	0.106109	0.112999	0.662674	1.08939	0.819232	0.365867	0.722908	0.10821	1.24897	0.703235	0.145142	0.253314	0.189657	0.169639	0.968768	0.722709	0.268844	0.484777	3.17975	0.131759	0.0416901	1.31254	0.511424	0.688004	0.233991	0.989015	0.338093	2.42959	0.272047	0.262579	0.3987	0.382809	0.421831	0.118178	0.556509	0.640746	0.39015
APOBEC3B	9.53049	2.45703	3.7983	4.89302	9.54613	18.8784	9.03998	6.38692	1.77813	2.66242	3.63658	2.82618	4.94875	3.92186	0.127321	5.77969	2.71924	0.231292	2.66233	2.53261	4.46295	1.93705	5.33128	5.42133	12.5759	5.43097	10.3089	7.66641	1.05866	3.45365	2.07165	7.84021	8.42099	7.84428	4.76786	6.91878	4.32151	3.03491
APOBEC3C	5.66986	7.68028	5.95563	9.06875	7.63297	2.65274	5.34058	3.80411	4.61135	3.53234	9.71992	1.95211	3.71347	8.21937	3.47322	6.22249	8.18963	6.9804	6.43794	14.9281	4.34202	9.63276	6.17605	9.1925	8.82221	11.1424	23.1258	3.95908	10.0134	5.89082	5.80648	4.8891	5.42901	4.05322	4.37942	0.518564	8.2873	4.77287
APOBEC3D	1.39438	2.24075	3.48948	2.92383	2.86632	0.619228	1.70798	2.35888	1.85708	3.0756	1.59285	1.17364	1.62497	5.17102	2.34498	3.98141	1.29499	2.56787	3.07746	1.73081	1.15163	1.52663	0.906559	0.997875	1.94587	0.96819	3.97196	0.854154	1.58083	0.684871	1.50769	2.95158	2.1357	1.7951	1.66523	7.33491	1.77207	1.06421
APOBEC3F	2.03421	2.16051	3.04084	2.67271	2.46197	3.98474	2.44754	2.67737	4.25725	2.76444	2.69976	1.46865	3.16968	1.96841	0.733805	3.2106	1.42391	0.563281	2.99101	1.59299	1.41659	2.04246	1.50239	1.55202	2.2447	1.67847	5.18307	3.38706	1.26477	1.58271	1.58641	2.4167	2.54779	1.91665	1.66301	2.61993	1.50671	1.3811
APOBEC3G	2.26708	2.00936	5.32102	4.49899	6.13738	2.058	3.34368	2.62691	2.38351	8.44435	3.87173	1.12983	2.36797	6.23105	4.65139	6.10998	3.88595	3.90572	3.13691	3.70317	2.1199	3.25463	2.27367	3.48204	7.24985	2.25215	8.50877	10.3923	2.5457	1.88637	2.30518	4.71441	1.1658	2.05145	1.79081	0.686696	3.68946	2.22996
APOBEC3H	0.450233	0.416444	0.237505	0.660732	0.0305865	0.390087	1.10903	0.429619	0.662428	1.11477	0.333498	0.0995981	0.83259	0.481503	0.11807	0.903761	0.604345	0	0.591359	0.704245	0.151815	0.123665	0.139983	0.362563	0.390147	0.183863	0.358071	0.351579	0.98762	0.329698	0.830215	0.529486	0.401379	0.420586	0.411979	0.0167494	0.263517	0.131752
APOBEC4	0.0679274	0.52447	0.0655267	0.0269865	0.0152	0.0959852	0.0202441	0	0	0.121223	0.292579	0.301993	0.0631465	0.249584	0.00821096	0.0721853	0.0985118	0.0205113	0.0854483	0.0173056	0.0677313	0.00483452	0.0240837	0	0	0.00412166	0.362842	0	0.00270059	0.109512	0.0901103	0.00363368	0.15331	0.039142	0.0730324	0	0.0135902	0.135488
APOBR	2.73442	1.08732	1.28461	2.09299	1.25957	1.42407	6.00803	3.50929	4.2926	1.84571	3.07137	2.62774	1.6968	2.20163	3.28545	0.758065	1.66749	1.18733	0.770911	3.84848	5.62644	1.50991	0.700238	0.651591	0.972539	0.779348	1.13181	0.371534	1.50206	2.17326	1.4109	3.13089	1.302	4.65007	0.409681	4.24655	1.41689	1.05052
APOC1	226.616	26.9202	82.3211	103.664	291.755	61.8398	105.644	76.9279	60.98	76.3609	16.6077	34.1349	116.891	62.0391	17.6659	52.1933	63.1565	32.8755	30.0723	1045.71	159.459	53.1771	86.1926	157.27	254.227	30.1637	75.8114	184.266	142.926	108.185	102.587	146.054	62.8817	289.003	22.8958	30.2973	24.6749	62.1823
APOC1P1	0.338133	0.20057	0.41163	0.00369354	0.19319	0.993165	1.13314	0	7.24192	0.434153	0.594664	0.328169	0.344931	2.84686	0.0214822	0.173746	0.428834	0.19668	0.215908	1.21685	0.28013	0.0227258	0.171335	0.507413	0.599648	0.0732296	0.166711	0.421349	0.351063	0.406524	0.80231	0.60771	0.638693	1.2929	0.0370738	2.47697	0.176577	0.34491
APOC2	20.8235	2.30941	14.1356	13.0319	23.375	7.83399	5.65242	10.0755	3.31818	4.79896	1.35523	5.39032	6.7036	4.73554	5.22217	3.96285	5.34159	14.3599	5.30253	84.6826	24.5549	5.28675	4.99128	11.5255	27.5086	4.70821	21.1224	68.3972	54.1506	7.75115	10.1325	16.6601	6.36133	12.4626	3.09574	1.16856	2.98232	13.0924
APOC3	0.0675528	0	0	0	0.229118	0	0.308879	0	0	0	0	0	0	0	0	0.177927	0	0	0	0.0651681	0.327536	0.361943	0	0.0638192	0.0769795	0.551029	0.212742	0.244408	6.00797	0.0253687	0	0	0	0	0	0	0	0
APOC4	0	0	0	0.0382216	0	0	0.0367056	0.467507	0.864784	0	0.0648941	0.178692	0.070139	0	0	0	0	0	0	0.0350892	0.0408059	0.106624	0	0.0412857	0.0930504	0.0248004	0.0260914	1.56186e-07	0.0819869	0	0.151435	0	0.023419	0.313014	0	0	0	0.0281574
APOC4-APOC2	2.45581e-08	0.0163893	9.06657e-08	2.93784e-07	5.2391e-08	4.5899e-08	5.43503e-07	3.17659e-07	6.01654e-07	4.87939e-08	3.07085e-07	3.43668e-07	4.02968e-07	2.79677e-08	9.81748e-08	6.07591e-08	8.99066e-08	4.45822e-08	3.40232e-08	1.51221e-07	1.52061e-07	1.50186e-07	2.23703e-08	0.0108414	1.34554e-07	2.13672e-07	0.0102331	0.0697181	1.10109e-07	1.26457e-08	1.54272e-07	4.14009e-08	2.2319e-07	2.26452e-07	1.74273e-08	4.08509e-08	5.69016e-08	2.68018e-07
APOD	33.2379	197.387	111.796	202.2	50.4518	62.2959	81.8236	234.754	137.64	84.9365	37.3226	1696.52	248.707	119.716	175.991	164.068	799.221	54.7906	525.679	316.116	40.2075	162.582	221.054	387.891	15.8592	32.7981	34.0104	5841.41	776.961	130.819	106.746	62.626	336.891	163.572	226.754	7.61788	177.355	447.773
APOE	450.21	70.6792	139.046	185.859	411.23	117.634	118.25	158.399	75.6273	108.403	32.9764	52.7939	149.001	119.779	31.2829	41.7944	107.369	67.4086	78.349	1178.85	334.523	156.885	186.346	441.286	577.119	99.2531	242.885	311.721	292.899	220.836	133.075	251.633	178.815	904.43	79.8305	212.461	64.0116	98.5977
APOF	0.0780853	0	0.431823	0.668479	1.6095	0	0.36657	1.02016	0	0	0.186163	0.0752647	0.526962	0	0.153166	0.0447591	0.0906147	0	0.0520791	0.0398319	0.140113	0.0754848	0.00464623	0.0246443	0.0262415	0.170497	0.00999063	0.329015	0.0233031	0.573795	0.0285111	0.0123636	0.144834	0	0	0.357551	0.678899	0.0855971
APOH	0.011561	0	0	0	0.440948	0	0	0	0	0	0	0	0.0157011	0	0	0	0	0	0	0	0.0950524	0.150062	0	0.0729532	0.0389482	0.14718	0.0885495	0.0671519	2.09974	0.0596553	0	0	0	0	0	0	0	0.0250382
APOL1	5.19192	3.08112	6.48961	8.41046	7.80326	3.96468	2.82755	9.121	2.48643	4.28124	3.75536	3.47451	2.44251	4.83538	0.514019	5.32399	3.79685	1.56591	3.43692	6.82721	4.86052	7.8842	8.27354	6.89226	6.35222	5.17806	21.7683	7.9116	3.89724	4.8517	4.81103	6.74193	4.40418	8.15541	3.32232	6.57947	8.02798	4.27051
APOL2	8.56812	9.16217	11.8571	18.6085	12.3942	11.9321	7.47252	15.688	7.40967	12.9744	12.3384	6.84568	7.42284	16.6608	2.98163	14.0506	10.2572	14.8951	7.93889	10.8531	6.87802	10.867	10.7309	7.70378	11.8271	8.18285	28.239	9.70221	5.24666	8.27269	9.49565	8.47779	9.89311	12.6297	8.83321	7.66002	14.4806	9.69583
APOL3	3.3668	11.5006	7.77259	9.16489	14.6799	2.6607	6.83023	4.49713	5.00426	7.71002	5.43165	5.33304	4.76749	10.0263	1.35318	13.6409	7.2629	4.01968	10.7536	12.8218	3.46646	6.46305	7.4284	5.46005	6.48701	7.32928	21.8367	7.72422	4.22784	6.17781	4.78563	6.07624	6.28841	5.602	3.78169	3.63712	6.84927	5.57417
APOL4	0.688884	2.90995	2.63342	1.31128	1.54505	1.20734	1.58859	4.48388	2.29619	0.70133	1.66687	1.98467	1.26651	5.60469	0.281004	1.76136	2.57081	0.274939	2.59066	1.3425	1.29141	1.88108	3.02107	4.40029	1.65252	0.658504	17.1299	1.46834	0.790743	2.80662	0.906481	2.12702	1.47908	0.817233	1.67307	1.39855	1.72048	1.2242
APOL5	0	0.0411203	0	0.13785	0	0	0.0819625	0	0	0	0	0.0257246	0.0385319	0.0117131	0	0.147089	0.030965	0	0.0249033	0.0478783	0.0140256	0.0151585	0.00560043	0.029603	0.0473372	0.042664	0.011991	0.0681331	0.00560137	0.0483172	0	0.0221378	0.129639	0.0938722	0.028241	0	0.0552819	0.0511528
APOL6	1.61945	2.67796	3.3306	2.72513	3.60345	5.07683	1.59162	3.77247	1.396	2.12163	2.26504	1.73984	1.35607	4.50443	0.802937	3.1607	1.95099	1.37895	2.04865	3.72917	2.40159	1.67129	3.6156	3.11218	1.87792	1.39082	4.63655	2.26266	1.87996	1.29548	1.96609	3.03078	2.57752	2.82849	1.11168	2.52409	2.36195	2.01689
APOLD1	0.413318	1.51782	0.150545	0.0579649	0.174574	0.867676	0.271791	0.117483	0.253706	0.618835	0.466163	0.411778	1.28227	0.634186	0.110863	0.215226	0.688639	0.381315	0.706794	2.53359	0.315753	1.69301	1.42216	1.19268	0.119093	0.0751443	0.322052	0.0784726	0.309113	0.132903	0.328672	0.243483	0.707456	1.61121	0.738193	0.670332	0.458841	0.596087
APOM	1.30425	0.868399	1.60158	0.627871	0.772659	0.667895	0.699362	0.215766	1.36964	0.322724	2.65979	2.07272	0.973565	1.13083	0	2.6071	2.29857	1.9932	2.74739	2.13766	3.59591	3.72597	2.58469	2.48326	0.700601	5.4432	3.12956	5.91704	2.68412	2.26683	1.62635	0.505109	2.02646	1.11335	0.505934	1.50515	2.08067	0.646609
APOO	14.1173	4.03688	3.96449	6.63154	16.517	4.40007	7.47557	6.74971	4.55976	9.57796	7.58122	6.26865	9.64475	3.97419	2.24012	7.16939	4.25444	3.45274	3.41296	7.31808	15.5481	7.74725	17.8059	7.15022	13.3381	10.6562	10.4779	24.308	14.5772	11.8668	5.13329	5.60456	4.47678	3.42649	5.01528	10.6468	6.91197	5.77976
APOOL	4.61455	2.16158	1.45653	1.27661	2.35851	1.81336	1.97758	1.29397	1.67021	1.98692	2.58912	2.83276	2.04568	2.0711	3.28104	1.76638	1.79006	1.88309	2.17463	2.16334	3.34816	2.32206	3.18393	2.68986	5.34097	3.37611	1.99311	5.194	1.9102	2.24803	2.06375	3.1798	1.0898	0.964123	2.83342	1.29595	2.05312	2.4334
APOPT1	8.30033	7.27935	6.55264	5.96966	8.94611	6.42027	11.7754	4.43969	6.16502	9.04536	7.11701	8.37971	5.90286	7.67815	8.76732	8.76454	7.21894	8.13631	8.13548	6.71268	15.1258	5.72535	12.6238	12.0147	8.72932	8.41798	7.28451	11.3146	7.89217	13.033	7.15408	8.36006	4.0915	5.23012	5.74965	2.03667	6.62436	8.23509
APP	209.018	220.879	190.207	180.612	442.569	815.722	155.841	310.377	165.899	272.842	287.716	235.22	300.017	225.472	220.697	251.594	305.58	187.555	394.653	678.906	559.644	790.167	972.558	554.425	227.29	881.186	535.42	294.87	893.355	763.399	502.037	124.258	640.686	427.841	255.698	595.024	354.652	406.577
APPBP2	6.85999	4.38034	3.68189	3.86664	6.26191	3.7185	2.29882	3.5154	5.58802	3.55624	4.04651	4.15563	6.48619	3.61657	7.29617	4.71963	3.89781	2.98923	5.29855	4.26773	2.67112	4.57324	6.55461	7.31539	12.4485	5.7184	5.51598	8.48681	4.89222	4.76588	4.09262	5.49744	3.4822	2.60987	6.19858	4.02026	4.14902	4.30782
APPL1	6.99019	9.91228	7.00368	7.94139	15.1747	5.70659	11.624	5.52693	10.8715	7.45073	12.7715	10.1624	8.11603	5.25225	26.8237	13.5757	9.5803	13.5154	13.5984	11.0996	9.64908	10.2622	12.0054	12.9931	13.4496	15.9115	13.1423	16.3416	9.19948	11.7147	14.113	6.00409	8.60176	4.5135	5.77509	4.40819	7.8961	11.8933
APPL2	12.328	19.8274	12.7444	10.8544	14.6802	5.99359	18.9219	10.2467	17.0807	10.1349	13.3957	14.7773	15.1071	11.7767	12.9307	15.9447	17.1164	12.6076	22.7261	15.2171	17.0881	23.1351	15.6046	20.9976	21.0022	33.539	28.468	30.5161	27.6045	22.2448	15.8734	8.46233	14.1426	11.0966	13.5956	5.73031	13.4845	12.7066
APRT	78.9996	13.4384	19.1713	31.3024	78.1299	151.802	73.4685	51.2769	4.43653	21.2022	27.8265	18.5091	34.9939	28.4681	16.189	13.614	22.084	7.53676	17.1486	68.8925	38.9703	85.6833	90.0623	69.2612	97.2869	41.7569	93.732	55.7321	123.859	95.0067	20.7807	35.2189	33.4191	61.5794	21.9397	72.4858	41.9778	32.3745
APTX	21.5532	18.0513	18.9373	18.2433	16.0091	20.464	13.8268	16.0027	18.3223	15.3389	20.9804	21.5929	26.7614	32.6054	41.2715	32.5348	17.0049	20.475	14.3326	13.8927	10.1984	16.6329	19.2468	14.5836	27.9978	19.7475	22.2967	31.201	20.7534	14.5174	18.4364	18.9093	17.0963	10.8669	18.3678	20.9672	14.7508	17.5013
AQP1	10.2899	23.2991	7.24086	2.86609	15.4319	26.6988	4.15711	3.66217	10.4767	5.33375	7.21992	6.57449	13.7844	11.4948	3.50879	10.7913	17.3429	2.13041	17.1954	91.5331	14.7001	47.9621	66.6505	25.9755	11.0767	3.87151	7.83531	7.43555	5.74284	41.0437	7.97974	3.73062	22.2043	18.2042	13.5732	2.35228	6.89289	5.18541
AQP10	0	0	0	0	0	0	0.333336	0.00911965	0	0	0	0	0.0100899	0	2.16999	0	0.0485585	0	0.0293079	0.00932373	0	0.00784709	0	0.0046159	0	0	0.00935871	0	0	0	0.016042	0	0	0	0.0055508	0	0.0144763	0.104376
AQP11	0.453494	0.29098	0.0750912	0.25675	0.200393	0.0774044	2.38428	0.0673996	1.19899	1.02686	0.173133	0.668867	0.413766	0.607074	0.773286	0.464644	0.159105	0.116257	0.192138	0.0988615	0.227555	0.0574856	0.23696	0.32773	0.397234	0.347517	0.263684	0.463958	0.085435	0.113828	0.218995	0.0523564	0.1952	0.149119	0.378061	0.414355	0.261207	0.33562
AQP12A	0	0	0	0	0	0	0	0	0	0	0	0	0	0	0	0	0	0	0	0	0	0	0	0	0	0	0	0	0	0	0	0	0	0	0	0	0	0
AQP12B	0	0	0	0	0	0	0	0	0	0	0	0	0	0	0	0	0	0	0	0	0	0	0	0	0	0	0	0	0	0	0	0	0	0	0	0	0	0
AQP2	0	0.00438834	0.0107068	0	0.0197233	0	0	0	0	0	0.127216	0	0.00412425	0	0	0.0171336	0.00494185	0	0.00398231	0	0.00219875	0	0.0155826	0	0.00328266	0	0	0	0.0403062	0	0.00870518	0	0.00556701	0	0	0	0.165689	0
AQP3	13.4919	5.83726	3.45408	3.08135	235.79	1.71023	5.78623	5.90792	2.17534	3.04836	10.5926	30.8099	18.073	9.05704	2.03321	1.30131	6.00735	1.74486	5.53358	4.28022	61.0117	3.69382	13.5574	4.93335	56.0894	11.9464	45.0767	28.6288	77.9793	2.36301	9.71255	1.5106	1.58828	1.97164	22.2018	32.5082	6.76556	1.63085
AQP4	0.0095114	0.312993	0.0694559	0.0606025	0.0664662	0.17985	0.039387	0	0.848434	0	0.0303172	0.109679	0.0635262	0.00308249	0	0.104154	0.0120103	0	0.107996	0.205544	0.0302386	0.034837	0.00419616	0.0330387	0.118129	0.0745728	0.0351065	0.0259356	0.0481933	0.25678	0.0617165	0.0115512	0.191994	0.0377216	0.0866222	0.0562536	0.028783	0.781598
AQP5	0	0.538814	0	0.0318425	0.434126	0.289653	0	0.286655	0.469504	0.044677	12.6964	0.0495061	0.0792784	0.317425	0.205458	1.02056	0.596075	0.245916	0.249448	0.20135	0.0161014	0.069311	0.0341244	0.0906255	0.0200946	0.0326561	0	0	3.1143	0.527205	0.315072	0	0.353772	0.0501942	0	0	8.74404	0.197129
AQP6	0.00475597	0.0388101	0.051564	0.0283238	0.0798245	0.0154952	0.00707929	0.544786	0.0101074	0.00748127	0.153536	0.0280647	0.0198784	0.0517504	0.0559869	0.0137732	0.0715797	0.0179304	0.014946	0.0337019	0.0391229	0.010159	0.00562347	0.132121	0.0159509	0.1818	0	0.0120983	0.068074	0.0104577	0.0274388	0.0171568	0.0409585	0.0124449	0.0304079	0.85631	0.318484	0.0421295
AQP7	0.388283	37.2756	6.99374	0.498326	1.681	2.69314	1.47425	0.432112	19.0405	7.83085	3.30513	3.63893	8.5374	31.2539	3.93487	6.94245	10.3282	8.79211	30.5118	44.3903	2.10075	2.74829	57.6746	49.0174	0.935627	0.079788	0.229916	0.435334	0.0720626	1.61444	5.60994	3.76863	23.2005	24.5008	6.7203	0.0821614	5.88112	3.84728
AQP7P1	0.0941634	5.55428	0.587725	0.262392	0.08157	0.971975	0.496083	0.0149049	3.36397	0.998156	1.21102	0.39856	0.927473	3.52671	0.366601	0.654107	1.35843	2.06043	4.52839	3.97384	0.383917	0.367718	2.76031	4.49864	0.0898025	0.028549	0.0211593	0.00759953	0.0148053	0.0735602	0.898009	0.702824	2.92548	3.54393	0.789895	0.142913	1.00314	1.37006
AQP7P3	0.170846	3.7369	0.274366	0	0.30908	0.148779	0.267389	0	0.398056	0	0.245645	0.460879	0.46953	0.219859	0	0.217229	0.811483	0.492107	1.01039	3.92077	0.689562	0.0618722	3.83362	6.27993	0.0486838	0	0	0	0	0.0256721	0.216923	0.166901	1.32313	1.12155	0.416924	0	0.9456	0.48258
AQP8	0.0209179	0.015228	0	0.0153228	0	0	0.33338	0	0	0.176421	0.104189	0.0142989	0.0427879	1.45428	0	0.0742727	0.103256	0	0.06918	0	0	0.112898	0.0813589	0	0.0469466	0.0095121	0.0200405	0.0303804	0	0.00770268	0	0	0	0.0561014	0.141063	0	0.0409249	0.0113663
AQP9	0.356075	0.147737	0	0.537249	1.41732	0.669318	0.0432689	0	0.748788	0.67924	0.105023	0.0115169	0.0809482	1.03172	0	0.204269	1.47739	0.0751642	0.257014	0.176661	0.0990858	0.0331277	0.224907	0.32155	0.631575	0.0640666	0.0265459	0.0270857	0.841895	0.191089	0.855325	0.372693	0.413414	0.703909	0.057328	0	0.273766	0.114849
AQPEP	0.0635244	4.63122	0.400555	0.29338	0.180518	0.339061	0.33035	1.22837	0.364371	0.517053	0.144983	0.144158	0.397765	0.71298	0	0.463255	0.494299	1.5899	3.64984	1.85657	0.114822	0.247799	4.65815	3.10379	0.351641	0.0289157	0.00679418	0.0384868	0.0173546	0.133625	0.751081	0.224751	1.23457	0.777892	0.229476	0	0.312026	0.0885424
AQR	13.2644	16.034	15.1261	9.17896	18.1192	14.9403	15.7452	11.4726	17.3231	19.0995	21.1381	16.8566	18.4685	13.2636	30.7536	25.1858	16.6425	13.6174	21.6122	15.234	21.9756	16.5997	20.153	24.2358	19.6845	30.0394	20.4075	27.4436	25.3119	16.3074	18.5557	11.5302	14.421	9.2305	14.3634	8.8942	15.9951	18.0694
AR	3.53243	4.29033	10.5666	11.6294	12.7225	0.509784	13.4357	3.68962	2.53547	7.24469	5.73013	13.7118	7.07985	3.14555	8.73132	6.43822	4.43229	6.51048	3.86342	3.42001	20.3666	5.23017	2.62	8.14524	12.3675	18.981	7.48992	7.31807	9.68513	14.488	6.18569	1.71198	6.93689	5.49263	12.9656	11.4771	4.2041	10.0163
ARAF	24.6296	10.4558	11.371	12.5582	15.9774	13.9917	18.7449	18.7721	10.4596	21.1413	18.3675	13.5386	13.6169	10.7728	13.5476	15.1642	11.1165	7.95761	11.6566	12.7882	12.6615	16.709	13.8037	10.9519	24.2641	19.7587	18.5122	17.3424	14.6666	15.6952	13.1194	27.2398	14.7921	13.8913	19.919	20.6807	13.2179	11.0163
ARAP1	14.2811	16.4549	15.7429	13.488	8.85007	10.474	15.9781	16.151	19.313	20.2106	10.1348	9.10858	14.5375	23.9359	10.9405	12.6258	15.1844	8.03042	10.1701	28.7811	12.2672	16.23	17.6913	11.8319	9.26936	9.83242	11.8042	5.06404	9.60011	10.4948	11.5484	13.4147	17.1452	39.3014	17.2975	28.0016	13.0507	15.1918
ARAP2	2.67635	4.41733	4.39466	3.50928	4.98223	4.0377	6.07384	3.73063	8.13489	6.07389	8.15672	1.05383	4.94748	5.05134	3.66446	10.1292	5.89332	6.40593	5.16267	3.91274	1.55466	2.00206	3.68292	2.96036	2.34986	1.34948	4.33728	2.56999	2.30699	1.71076	5.00608	2.38381	5.02194	2.57196	3.60613	0.634923	5.37784	3.12748
ARAP3	1.27426	3.25187	1.33013	1.0402	1.29525	3.74592	1.15294	1.17539	3.08609	2.44989	1.557	2.41474	3.51237	3.38757	2.1419	1.82015	3.08063	1.7165	3.13902	4.91297	1.07418	2.88912	2.78442	2.32494	1.42616	0.545317	0.783749	0.741516	0.776017	1.19088	1.66017	1.31097	3.08483	3.72249	2.98846	3.2258	2.09516	1.43538
ARC	0	0	0	0	0	0.111182	0	0.0107734	0	0	0.0647743	0.0473556	0.00594292	0	0	0	0.00712993	0	0.00574318	0.0162685	0	0.00681443	0.183552	0.0241933	0.0356863	0.00775033	0	0.00618921	0.0126941	0.0249541	0.0125604	0.0102603	0.196414	0.0569387	0.0392804	0	0.0127902	0.084997
ARCN1	25.5245	21.7281	23.5294	21.0733	27.0247	27.5955	18.1651	32.1914	20.4737	20.007	31.779	35.6841	28.1812	27.7613	27.2079	21.7385	24.7639	12.4072	27.8318	26.7601	41.3703	34.6526	56.4984	34.9839	25.5835	36.1034	58.2648	29.8309	43.8661	39.3485	30.7764	22.1852	25.5174	20.2472	21.0033	28.0953	20.6513	21.0765
AREG	167.815	23.6399	316.526	28.4227	6.20765	15.4572	12.4401	34.2772	6.67005	31.5692	70.1409	28.3337	54.0639	62.369	17.1451	8.99207	93.0353	273.16	85.3924	141.429	14.2142	90.5667	2679.97	356.197	59.4263	27.7904	32.2041	30.2628	21.1438	2.79016	61.4467	491.184	233.152	121.659	106.338	0.0626068	33.0023	347.176
ARF1	110.049	15.9221	23.5755	38.2993	91.0482	44.3463	25.9186	26.374	13.7057	16.2868	28.0706	48.3184	32.7258	11.9339	8.02974	26.4539	18.8995	14.1638	22.0047	47.528	121.706	46.2575	79.9562	54.494	82.7747	48.9181	111.67	85.4118	101.818	104.313	25.5552	33.7764	23.4391	30.1588	30.9491	22.0731	26.594	28.0459
ARF3	27.8133	5.32347	7.24174	8.04997	11.9216	5.65365	8.89667	23.9721	5.17649	4.46656	8.36345	6.85208	12.171	7.38222	2.20921	8.86874	6.18468	6.07178	7.57863	11.2407	18.5667	12.4892	15.0162	41.5878	13.5817	17.6046	21.6239	13.5571	27.8765	19.9439	9.49668	14.8335	9.57865	10.4311	13.359	10.4194	11.8907	10.2903
ARF4	36.0574	28.2854	28.8267	29.9564	96.842	34.0455	16.9167	9.91633	16.2542	17.5153	27.1395	20.6196	19.3971	12.0398	31.5499	33.1353	32.0991	17.1545	15.456	34.4658	50.915	60.1058	68.1677	54.8673	35.2285	41.3593	55.671	106.663	42.1412	76.4499	33.7484	13.3328	20.5155	11.8078	13.0523	5.63773	26.0804	27.3658
ARF5	32.1839	9.99376	14.2571	15.2163	41.6357	25.6929	16.3108	17.0665	7.3965	11.757	8.22726	15.1842	20.545	8.66071	3.65418	16.312	13.2543	9.53739	14.83	27.3442	58.9572	31.2644	72.7414	39.8572	59.6012	44.5132	44.9003	101.539	45.7365	48.2444	18.0122	34.2022	13.8263	17.8013	23.7813	9.53716	17.2875	14.6536
ARF6	9.92443	3.68147	4.22281	4.09369	10.0417	5.35283	4.14335	7.52625	1.96445	3.35561	6.34601	3.56828	6.73067	7.27178	4.57549	4.55435	4.33537	2.97763	3.92529	5.09142	7.62147	6.78256	4.90562	7.07384	16.307	6.94739	7.98018	7.52864	9.69399	9.62689	5.4037	7.76996	5.33524	10.6988	7.43722	3.22008	8.10949	4.90279
ARFGAP1	27.7126	12.4224	12.4124	12.4766	16.3256	24.5368	16.4376	25.1762	10.9347	24.0908	10.9458	8.67188	20.2203	18.5878	3.28344	11.5506	13.313	7.94688	8.29803	9.30541	18.5514	14.5864	6.83061	7.27402	11.3269	8.82942	9.71279	7.00836	10.0948	16.5664	11.4506	27.815	14.3835	57.0046	19.3451	24.5965	15.0354	8.46265
ARFGAP2	18.2159	8.72576	7.63169	9.82762	10.3576	12.7194	9.82893	15.2473	9.74808	10.6617	8.97376	12.2121	12.7919	9.19721	7.67756	7.97872	8.08569	7.05048	9.63469	12.4104	17.3153	13.1956	12.2349	13.4958	15.8881	15.7369	15.996	11.4653	11.5351	12.2842	8.77319	11.5843	10.2863	12.2789	14.0437	11.5428	6.82933	8.62509
ARFGAP3	8.3367	14.8325	9.01082	8.9806	35.4926	14.0965	11.2186	6.77742	5.10583	10.1291	19.4449	11.5299	8.33211	8.4617	7.56838	10.1627	16.2783	7.05333	13.1346	15.0928	11.1193	21.8144	25.2614	12.2911	8.39743	5.04511	25.4838	31.3161	22.0733	16.6919	10.6993	5.34293	9.46758	7.97653	6.93284	3.59696	8.20944	8.9865
ARFGEF1	31.3469	23.7233	14.5013	23.3736	21.4018	19.2592	30.9832	13.8006	35.1754	24.2539	28.9357	19.703	38.9921	36.723	59.9512	26.7582	21.7113	38.2273	26.9935	13.6986	21.0847	14.7703	18.1884	26.8699	25.8292	27.085	17.0112	22.6626	22.0626	13.5136	26.4067	37.8907	15.4777	16.044	24.0217	5.47438	19.4048	22.9947
ARFGEF2	78.0512	30.0213	31.878	36.436	61.1823	44.3899	54.6168	78.1444	28.2195	63.8907	52.947	48.3924	60.7765	34.739	40.9369	46.6087	32.0524	33.7075	46.2667	38.7107	40.1018	41.9172	31.4797	31.5225	34.2909	66.4149	41.3958	43.6685	70.608	48.3319	37.5932	98.4802	42.9362	44.3414	56.8236	24.7389	32.8616	41.4664
ARFIP1	10.3193	4.52308	3.67828	4.45734	8.38799	4.11476	6.80588	4.69636	5.22928	4.51917	7.05136	6.90952	8.62864	4.19841	14.9907	7.97095	5.29213	6.45866	5.71372	5.1454	5.7822	7.0223	9.13271	8.67912	6.10302	8.6724	9.85646	8.79235	6.35244	11.5141	7.25205	6.32361	4.06387	2.41051	5.78126	3.30856	3.42443	6.10965
ARFIP2	13.9068	4.25798	9.06899	6.88976	8.5862	3.9556	8.15064	8.10876	2.24146	6.99289	9.32243	15.1192	7.48638	5.8327	4.25299	8.9483	4.61264	4.31767	5.70441	5.17014	11.4723	5.93155	11.2717	6.63535	7.57072	10.2185	21.6288	14.5103	8.32844	10.5884	7.58796	9.13209	11.4018	6.50479	7.64032	17.1635	6.20045	7.53657
ARFRP1	14.6587	7.1661	5.64426	9.93772	6.83938	10.6801	7.99436	14.6923	7.21117	15.0416	7.92792	7.0467	8.92273	12.3288	6.80778	7.4486	7.7821	6.15315	9.50224	10.8032	15.0746	12.5753	9.37436	9.10987	9.02524	9.1728	8.4837	6.39385	9.73711	12.4129	7.28019	15.8767	10.2723	32.7174	10.5896	10.8699	9.24635	7.69504
ARG1	0.0091201	0.360309	0	0.0402514	0.0920438	0.244161	0.0798204	0.74482	0	0.309676	0.387837	0.513354	0.362687	0.570488	0.468791	0.312453	0.542589	0.0942094	0.569754	0.163001	0.142789	0.221086	0.00544157	0.0230352	0.0102282	0.166018	0.0816657	0.0530256	0.283328	0.00670909	1.76616	0.143715	0.302988	0.225021	0.426271	0	0.0448526	0.209165
ARG2	1.1907	2.50879	1.16258	1.44398	1.42843	2.99558	2.31732	1.9489	2.25729	1.92944	1.72204	0.759321	1.15884	0.970412	2.0547	1.68539	1.4368	3.05018	1.87499	2.96887	0.851175	2.40864	2.41873	3.29626	1.69884	1.77995	2.78952	1.54494	3.37658	2.55602	1.62153	1.30156	1.81777	1.74308	1.04624	0.477897	0.922244	1.46911
ARGFX	0	0.0143919	0.00673341	0.00240422	0	0	0.0181109	0.0245689	0	0.000956347	0.00562296	0.0235356	0.0135292	0.0137801	0.0154367	0.0280968	0	0.0201998	0.00652956	0	0	0.00255853	0	0	0	0.00547612	0	0	0.00286809	0.000586675	0.0121894	0.00389535	0.0114167	0.00381588	0.020508	0.129613	0.0402389	0.033145
ARGFXP2	0.115269	2.19091	1.72109	2.40769	0.0387921	0.494173	3.12421	1.08553	0.962448	2.41025	1.41664	1.66566	1.34649	1.94952	1.59395	1.53341	1.24805	2.65414	1.06388	0.176625	0.292934	0.174546	0.0553051	0.116382	0.0776653	0.293495	0.132436	0.0585851	0.151506	0.0254905	1.23304	0.539356	1.3367	1.06402	1.00614	1.73588	1.50498	2.07228
ARGLU1	43.2409	58.3644	43.3208	33.4023	24.0425	63.8322	56.8185	78.3816	41.6927	63.0039	48.0717	41.7118	64.7103	153.142	25.8229	41.1812	62.328	44.6858	82.9631	79.4507	43.6559	50.1337	33.2464	30.8452	36.7731	44.9224	32.9504	21.0575	32.847	22.7258	48.9188	49.2987	89.6088	107.135	94.0546	76.1526	63.6141	34.0601
ARHGAP1	22.6708	20.1906	16.2595	14.6815	17.7607	18.8939	13.9382	16.1626	11.6185	21.3216	16.4033	13.5525	21.1309	16.8295	9.53795	20.5912	24.2548	12.8516	16.1252	24.6922	26.3106	38.9555	27.6649	33.6812	23.3739	31.4979	40.3653	16.5471	31.8003	36.3581	24.5307	12.8856	22.5435	19.1254	22.6179	16.4044	19.3901	21.5182
ARHGAP10	12.9282	30.53	5.08419	7.49224	14.4074	14.2276	19.4948	16.8776	21.9728	7.13702	7.48616	5.01773	13.299	14.7501	12.7987	15.3675	24.8473	11.8951	34.6271	27.3502	4.26993	16.1597	12.8576	11.1803	18.4311	3.54401	1.84873	2.69043	4.65317	13.8005	10.8865	12.3454	16.7565	14.126	16.9461	1.1436	8.22505	10.8974
ARHGAP11A	19.0687	2.64538	7.34832	7.45156	9.1694	29.2089	30.154	31.3269	4.17414	7.53093	8.21691	10.603	10.366	8.46195	15.3795	22.497	5.29984	11.09	2.32867	3.61417	7.83047	1.59472	8.55331	5.41676	11.8295	2.90328	10.3183	2.29769	1.50862	3.6082	12.2412	12.9233	11.0592	4.4931	8.33968	7.61176	7.47234	10.4874
ARHGAP11B	29.3325	7.17083	22.0776	21.2697	16.4803	67.7547	59.433	86.8889	10.4617	15.0322	22.1494	21.3771	26.7196	20.2162	29.6272	56.0778	12.9409	27.6083	4.71497	6.7467	15.2608	3.43754	14.9876	9.10167	22.0698	5.45209	16.6495	3.52858	3.15978	4.89192	29.6565	32.117	31.4081	12.2658	21.6357	16.8713	19.0849	23.6667
ARHGAP12	10.116	13.5967	10.2427	9.20258	15.0622	9.03994	15.6318	12.4742	14.3826	10.0889	12.144	17.9823	13.0676	16.2089	22.0936	17.2106	13.1286	12.1619	20.4648	13.8669	18.5746	14.2092	12.6009	17.5003	15.7171	28.4612	1.59853	22.3433	13.3385	16.0071	11.6286	11.8527	10.657	7.40442	9.40996	8.09528	10.1661	12.4235
ARHGAP15	5.03628	9.91779	7.89104	7.82674	14.817	2.29768	6.41377	8.50826	30.2333	11.355	9.54965	2.77653	4.71251	11.3136	5.45118	12.7545	13.3965	5.12699	9.35557	14.3944	3.9663	5.96662	7.02262	7.64387	13.4074	2.55241	5.26821	5.08451	5.97577	4.1364	5.20576	7.62911	6.02188	8.04223	6.91034	2.72927	9.24988	4.71008
ARHGAP17	9.84704	16.4413	10.8163	9.47637	11.9382	12.1105	12.4883	8.9395	11.0845	14.4122	10.526	10.5496	12.6007	15.4177	11.5665	14.1749	16.5025	7.1127	18.9475	24.4931	13.7071	12.7009	16.6663	13.4544	15.3767	20.4078	11.4745	10.2203	10.6695	13.3093	11.8125	9.01545	11.8011	12.326	14.8566	10.3906	11.2413	12.439
ARHGAP18	7.62124	11.1001	9.25417	11.7409	19.9523	8.16469	9.90054	8.6273	11.2275	16.4426	17.2814	7.92693	8.18762	12.2959	11.2479	18.2115	18.4376	7.81228	10.3519	17.9592	8.36562	11.5856	16.9301	17.6471	14.4483	11.356	16.7185	17.3029	13.8574	16.9814	13.4964	5.65218	9.26188	12.3243	9.70596	4.7758	10.4537	8.84642
ARHGAP19	0.185903	0.298329	0.062261	0.0596132	0.269522	0.182423	0.163286	0.0640346	0.00569506	0.00999824	0.15539	0.0596956	0.232864	0.00843333	0.0553284	0.115862	0.170779	0.105827	0.268293	0.571835	0.133493	0.29039	0.198003	0.29174	0.191072	0.170775	0.146622	0.102946	0.111095	0.117662	0.171858	0.166433	0.085437	0.119305	0.115117	7.76452e-09	0.162839	0.198021
ARHGAP19-SLIT1	10.3309	12.4913	8.61639	5.97666	10.4049	7.22828	7.52007	3.54878	9.66406	8.32285	8.29183	9.77184	10.0823	7.85498	14.9632	8.63657	10.3313	11.3096	15.9614	12.7709	8.47746	11.8872	9.69292	15.6786	8.15318	7.859	8.55041	6.509	6.2148	5.8945	7.9515	11.4495	12.9007	7.80317	7.78113	6.91933	7.1565	10.3233
ARHGAP20	0.10951	2.42796	0.371912	0.337518	0.424052	0.296258	0.463224	0.11507	1.3041	1.18081	0.878646	0.219232	0.509452	1.18467	1.2001	0.351656	1.33843	0.278265	1.63693	1.89275	0.254511	0.575547	1.29302	1.82275	0.137478	0.112168	0.0854329	0.30926	0.114211	0.231655	0.657374	0.172874	1.13984	0.298322	0.47847	0.0128825	0.790238	0.561699
ARHGAP21	12.5767	38.6443	11.7546	11.4898	6.58368	24.6252	19.3741	13.0011	45.3553	18.2233	26.0763	18.1247	21.8503	27.3185	34.0825	18.9495	32.4273	32.3712	40.523	21.8032	15.7644	21.1518	22.2995	16.0071	16.9096	9.5448	11.6277	10.0241	11.812	12.8635	19.1387	9.67923	17.399	12.7085	14.0005	4.65165	14.4607	17.0693
ARHGAP22	0.717292	1.52556	0.768665	1.61034	0.756029	2.236	2.34173	2.83965	9.16799	2.05783	0.80117	0.609521	1.34117	4.56191	0.919321	1.27063	2.77232	2.81515	0.700183	3.69871	0.488449	0.723268	0.568708	0.847659	1.33852	0.437725	1.11612	0.978033	0.596625	0.812837	1.62279	0.796531	1.93354	2.42219	1.25245	2.5269	1.62634	0.60616
ARHGAP23	2.17234	4.74082	1.72166	1.66435	1.21126	6.51324	1.07705	3.88098	4.79455	2.144	3.33472	1.20305	2.61162	5.38777	2.25009	1.97962	5.45791	2.23809	5.08802	6.30546	2.44842	5.44696	5.39224	2.77735	1.20241	1.10055	1.47843	0.376036	3.19987	2.33679	3.29902	1.45415	4.08096	4.81322	2.91855	2.36997	3.33267	1.7977
ARHGAP24	2.65513	14.1959	5.02752	2.88064	5.98613	4.54316	2.27025	2.48379	12.5456	5.24744	3.86706	3.0803	5.11726	8.03375	8.13415	3.78505	9.79495	4.33525	13.2951	8.45887	3.92607	8.04503	8.78592	8.24318	4.89271	1.71782	1.56745	2.4069	3.19205	5.62591	6.02714	2.29385	9.38173	8.07606	5.87132	1.77296	5.62286	5.46449
ARHGAP25	5.0771	5.63222	7.78059	5.48231	7.01694	4.96812	4.65986	4.74437	8.16451	6.26788	4.74891	2.98558	3.20683	12.2527	1.4438	6.25492	6.77981	3.60136	4.87087	16.8698	3.07237	3.39063	2.36575	3.60627	7.06186	1.84074	3.57582	2.84482	3.13135	3.13484	4.07417	8.06952	6.24242	10.1085	4.56341	0.771861	6.98669	3.95797
ARHGAP26	1.36633	5.5886	2.67447	4.00463	2.96419	4.00235	1.95484	3.24012	5.21931	2.49639	3.47398	0.974928	2.21432	4.40189	2.47935	3.32943	6.66602	5.18899	8.20385	6.56286	1.52364	5.10562	2.9321	2.17395	2.08667	0.854268	0.942526	1.32437	1.52994	1.85884	3.20186	1.95759	5.01913	4.64761	3.22225	1.21413	3.43826	2.33877
ARHGAP27	3.86988	0.373742	1.58598	1.37261	0.607544	3.19596	4.55267	9.99455	2.1716	3.11093	1.30511	0.580892	1.46656	1.58309	0.210133	0.297985	0.868866	0.376472	0.927217	1.68182	1.22918	0.770014	0.600613	1.12555	1.55375	0.551159	0.582343	0.790753	0.52369	0.64007	0.564026	1.05984	1.66023	3.22971	2.35179	3.17778	1.22908	0.378205
ARHGAP28	0.452429	4.48297	1.70115	0.714783	1.30121	0.950276	0.681815	1.086	1.18977	1.16742	0.784399	0.518981	1.40282	2.8542	2.0958	0.875852	4.76171	0.781992	2.37679	1.56963	0.530601	3.38398	1.35089	2.50754	0.982931	0.401909	0.200188	0.0686648	0.465989	1.61113	2.58403	0.556964	2.89769	3.09418	1.61477	0.0028894	1.91303	1.95232
ARHGAP29	12.4348	24.8231	10.3718	11.8889	18.2717	10.5848	26.9527	9.58685	13.3961	25.9503	13.6734	53.3117	16.4906	19.1589	27.6834	13.0506	19.1686	36.5672	35.3929	19.9397	29.2143	21.1915	37.0984	18.2586	15.6164	12.6449	2.13245	31.7003	10.1728	21.1229	13.0221	4.18484	16.9871	4.29395	7.68381	6.07842	21.0746	12.6334
ARHGAP30	4.54521	5.49684	7.86739	6.96601	6.00058	5.90038	9.20143	11.0516	37.4425	21.4152	8.93919	9.68803	6.07223	22.0934	11.2077	12.6608	11.4446	11.9276	7.42774	13.9226	4.35986	3.41086	3.96502	4.8359	7.89087	2.32185	4.2612	2.39255	3.42792	3.34751	8.02351	6.50674	7.47554	12.254	5.63265	8.10318	12.0744	6.72777
ARHGAP31	7.7132	20.684	11.1138	8.5832	9.4777	16.9552	10.4337	9.18909	14.7995	12.2155	12.6918	5.11961	11.1732	16.4854	8.04305	10.8071	17.0526	8.55466	19.7858	31.2675	9.53169	17.3508	16.3391	13.4842	10.0372	4.38994	5.16239	3.08338	5.77935	11.4033	13.5084	6.76583	13.5843	14.4299	11.1002	3.28193	14.5854	8.36274
ARHGAP32	14.1179	9.77595	10.1051	8.5583	6.15075	4.97235	7.7233	15.4307	8.95778	12.7949	15.4742	20.7656	23.2287	19.3467	5.88725	13.7737	10.4083	11.8087	9.45534	7.33558	8.83944	15.2968	11.0825	8.26794	7.67926	17.4936	8.68268	9.40514	19.7918	9.30656	14.2676	16.3085	13.9283	6.94931	16.5395	7.13703	11.8944	8.52746
ARHGAP33	2.60406	2.34268	5.91462	3.96446	0.770548	5.40692	3.64193	5.81407	6.69601	7.06637	5.19486	4.07307	4.00469	5.58962	4.51978	1.93999	2.24081	8.91332	1.49115	0.976969	0.878035	2.4479	1.09529	0.316799	0.697048	1.15262	0.753792	0.670107	0.407286	0.293758	3.34973	3.45067	6.08654	4.38264	4.54513	6.68856	2.68306	2.92634
ARHGAP35	38.2792	17.049	21.729	15.6802	14.0611	21.3787	26.8346	15.0383	33.0576	27.7648	41.0621	31.2647	28.6025	18.2761	30.3216	28.4983	17.2459	61.0884	20.0832	15.1669	38.7386	20.1838	21.7388	9.50537	16.282	39.7741	26.8981	4.85394	28.2633	25.9235	24.8228	22.7847	21.8037	10.9804	25.1435	16.2474	28.167	18.3995
ARHGAP36	2.10808	0	0.645351	0	0	0.00660939	0	0	0	0	0	0	0.146966	0	3.77296	0.00587314	0.00678018	0.992117	0.0109236	0	0.00907805	0.209316	0	0.0817529	0	0.0184147	0.547409	0	0	0.0948457	0.00895811	0.0422915	0	0.012744	0	0.00526365	0	0.803862
ARHGAP39	4.02822	1.35297	1.53033	2.16904	0.873655	2.21925	2.28214	4.275	1.92243	2.74531	2.78366	2.17446	5.65692	2.11325	2.13624	1.85657	0.897176	1.86566	1.65511	1.13793	2.5648	1.54737	0.998822	1.99193	2.70744	2.10641	2.25409	0.783414	1.08683	0.940627	1.35383	4.76509	1.78248	5.66099	4.60225	1.67751	2.26132	1.25812
ARHGAP4	7.80244	4.65436	5.68594	4.40789	4.31662	5.36395	10.1147	20.1893	12.02	8.10494	3.91506	2.0784	3.73091	14.5818	1.28149	3.49986	6.20187	3.98064	4.44265	10.3096	2.61414	3.52404	3.54316	5.4252	9.77362	1.72363	2.81542	2.17594	2.22567	1.9287	3.92341	5.03907	6.75126	20.7152	5.43626	11.3373	6.11728	2.39979
ARHGAP40	0.265563	3.22484	4.55714	0	0.0495186	0.368184	0.0527892	8.36521	1.87724	1.03196	9.77888	0.418264	2.5129	0.136228	2.96286	7.26304	2.39297	39.5944	8.36619	2.1905	0.0397198	0.890523	0	0.631562	1.79331	6.22602	0.00851175	0.00965107	12.565	0.00324319	0.368704	6.42381	13.7083	0.320105	2.76123	0.0344674	1.1339	1.93306
ARHGAP42	1.83821	7.15363	1.8256	2.69696	2.51505	3.56461	1.48252	0.722478	5.41732	2.96127	4.29445	1.26046	2.59872	2.93781	3.60421	2.38169	6.35972	1.56059	6.20287	4.57552	3.14203	3.89415	4.15665	3.16415	1.18928	2.07606	0.518067	0.48972	1.7735	2.41482	3.09261	1.47079	3.2378	2.22469	1.92335	1.21147	2.85544	3.7518
ARHGAP44	1.02389	1.78274	3.01018	0.509425	1.05456	1.86456	0.18504	1.1864	0.565017	0.759561	3.4622	0.442769	2.0195	1.19369	0.390276	1.65185	1.84267	1.94553	1.79753	1.65235	1.1612	2.04445	0.929053	1.10731	0.36713	0.194297	0.159151	0.207585	2.77662	1.52601	2.17603	0.745639	1.32205	1.09784	1.52335	2.39937	1.33324	1.16008
ARHGAP5	13.5445	17.5386	10.0669	8.42914	11.7026	13.8992	17.7735	6.35597	19.7805	7.31694	17.0601	13.8162	14.9077	15.9734	40.4249	13.9018	15.4859	0	20.0344	9.19628	8.8521	8.41552	7.17785	9.24257	6.13871	9.01112	4.27746	8.92752	17.0459	12.6252	10.3493	9.76184	10.0684	5.99139	10.4842	1.18298	9.71216	13.4386
ARHGAP5-AS1	0	0.0779509	0	0	0	0	0	0	0.0176232	0	0	0	0	0	0	0	0.0528622	0	0	0.0410411	0	0	0	0.00676301	0.0240559	0	0.0136875	0	0.0448086	0	0.0155262	0.00838472	0	0.106641	0.0320861	0	0.0209466	0.0232734
ARHGAP6	0.87145	3.72268	1.1845	0.483051	0.574671	0.983153	1.14278	0.651132	4.79764	2.12302	1.25146	2.32947	2.00318	2.0414	0.975378	1.08286	3.54497	2.13532	4.05324	2.92546	1.20075	1.83608	1.73148	2.27384	10.9243	0.429027	0.700075	0.791402	0.610307	4.62622	1.09223	0.726347	3.41552	2.98956	2.09699	5.97669	1.75901	1.57244
ARHGAP8	14.7542	0.00276626	20.2688	9.73304	9.97713	12.4112	35.1849	32.2184	6.9296	5.1418	17.6779	35.4919	41.2732	20.8113	3.3236	24.7371	6.02848	10.9909	7.60669	9.60418	10.0014	11.3519	8.70023	4.62359	29.2033	7.39372	14.1013	22.3682	15.0921	5.28377	13.4846	22.5783	15.4999	22.6488	17.2011	8.14857	5.75427	6.71586
ARHGAP9	2.21366	4.3282	5.83174	4.32591	4.40191	2.28231	4.7374	3.88187	5.33527	3.71662	4.04596	0.828844	2.11317	7.56445	1.81525	4.35153	6.13284	5.12483	3.0618	7.08534	1.61656	1.59804	1.99011	2.8029	4.66034	1.53571	4.33598	2.03604	2.22802	1.9575	3.75343	4.96404	3.19793	6.70759	3.43614	5.69527	4.98732	2.53718
ARHGDIA	165.174	34.0054	39.4566	47.0717	34.866	93.8482	67.7037	90.7487	37.6249	40.3264	47.0478	45.4851	81.0473	57.3372	29.5659	52.8305	42.9888	24.2742	31.7732	60.7701	57.1507	58.8966	88.5526	88.2775	237.478	50.9329	93.8798	59.7142	63.119	69.2947	41.9917	75.3154	49.6581	70.7471	78.5769	63.5652	46.3119	42.9599
ARHGDIB	49.4478	33.2394	71.2732	56.1642	103.884	21.4107	79.3969	23.6041	36.4724	50.9021	70.2959	35.3114	36.0271	48.2748	41.0273	110.191	61.8859	45.2394	50.4475	70.321	141.833	83.065	57.084	82.4756	112.464	143.052	85.6768	147.316	52.8909	175.925	71.9947	46.1537	69.6844	52.5339	67.4705	58.4062	74.664	72.9508
ARHGDIG	0	1.35586	0.0268197	0.022418	0	0.0971179	0.637019	0	0	0.162947	0.0571417	0	0.0207723	0	0	0.0650198	0.0251768	0	0	0.744137	1.44952	0.270596	0.366106	0.13706	0.02621	0.02821	0.0494098	0	0	0.0459127	0	0.142939	0.29273	0.349365	0.0569606	0.0377571	0.134101	0.0995556
ARHGEF1	15.9931	19.4802	22.8428	19.0661	14.5795	31.0603	17.0803	28.4293	31.9262	33.0482	17.1067	14.0554	19.9228	45.8505	8.01979	26.8422	19.9692	31.4692	13.0425	20.2091	17.2581	17.0846	10.7247	8.09933	11.8918	10.4326	12.6034	7.56927	18.6948	9.2834	15.7182	22.7581	24.4463	41.9524	28.3303	28.4414	19.8485	13.0228
ARHGEF10	5.29287	15.5858	8.07491	8.18647	5.97978	21.4138	5.8889	3.96046	4.57577	12.697	6.26694	3.77327	5.76649	7.70163	9.69033	7.48489	12.6164	11.329	16.1385	12.5046	6.59059	13.377	10.3188	8.08237	7.89966	6.83771	4.56862	5.16062	6.36337	9.85024	14.4896	7.06586	11.4911	8.43533	7.02652	11.3767	17.543	10.7844
ARHGEF10L	14.8463	6.87762	8.86992	5.18004	9.43591	10.8902	6.41111	15.2847	9.08315	9.79359	5.17539	2.98299	7.30439	14.0954	5.41846	4.52133	6.46455	6.37102	5.86361	9.03398	3.76732	9.08367	3.54409	4.41083	4.13127	11.0566	1.37464	4.14386	3.78355	4.45607	7.81751	11.2968	13.3583	18.4905	12.1183	11.5726	5.46036	3.85037
ARHGEF11	18.7422	10.5541	8.95562	14.1306	9.72758	14.0051	11.0602	13.3111	11.6734	16.3587	15.2529	19.1617	14.9533	11.0768	11.5309	17.9999	14.111	13.2068	15.7906	19.577	15.6807	13.4927	12.0247	9.80139	10.6608	12.2703	12.9485	8.35184	19.118	10.741	13.4392	8.46334	14.0684	13.3147	16.1122	15.6878	10.3441	14.783
ARHGEF12	24.7475	28.4557	24.5099	26.4323	22.5255	19.2911	31.5904	26.4247	22.3121	30.6132	40.3198	39.5117	44.8579	33.3667	44.8023	28.2492	28.3299	25.7027	40.4947	35.232	24.7281	49.4198	45.5822	27.2534	22.3405	69.018	42.199	21.754	33.5626	36.1007	43.0649	18.9814	33.8806	21.2185	27.2032	17.6778	24.3846	25.5108
ARHGEF15	0.647685	2.29915	0.718931	0.342089	0.550961	0.993398	0.722077	0.740739	0.509917	1.32297	0.790923	0.677739	1.24648	2.24901	1.43255	0.872686	1.56366	0.522643	2.11609	3.54392	0.866809	1.68205	2.95761	1.2505	0.733482	0.414416	0.58869	0.438053	0.315033	0.879461	0.82149	0.746768	1.77802	1.73068	1.31657	1.11179	1.11198	0.63658
ARHGEF16	5.67032	1.34112	3.18199	2.12447	1.64269	1.06409	4.47059	8.55411	0.699256	2.25984	2.35396	3.90219	4.89977	2.73756	2.82197	1.89132	1.18588	2.21927	1.3105	2.03803	3.42989	3.74914	4.47923	2.48675	2.36263	3.93859	6.49224	2.83135	1.94434	1.97128	3.61177	2.93069	3.22752	3.0059	4.35515	6.30983	2.77716	2.75837
ARHGEF17	4.71451	8.43042	5.44205	4.47067	1.69265	7.4586	5.84538	6.22632	7.66084	10.9796	5.20692	4.05995	6.68	7.44268	3.90273	4.49125	7.07394	5.82251	8.25596	8.08527	4.11479	10.215	4.18212	4.6891	3.40127	4.43696	3.15988	1.40014	3.37892	5.08046	7.38254	4.82315	8.54443	9.50842	6.02967	10.1676	8.77837	8.71222
ARHGEF18	2.29271	2.71734	2.9636	3.14006	3.25383	3.62079	3.08125	4.26097	3.35279	3.9886	3.00954	2.20494	3.05089	3.85426	4.42174	2.95306	3.06436	2.57208	2.56796	5.14844	2.4479	3.61156	2.68431	2.03549	5.28413	5.36038	2.95404	2.45226	3.32404	2.94734	3.03551	4.1877	3.97242	4.75759	4.08101	4.32507	3.19189	2.67201
ARHGEF19	2.98096	1.18476	1.61579	2.02602	0.743615	3.00022	0.363689	4.8245	0.873535	1.41986	0.654572	1.90649	0.939859	1.17208	1.02771	1.25816	0.774686	1.48041	0.902625	2.19021	2.24169	2.17142	1.72833	2.15588	1.44414	2.38259	1.26269	1.34748	2.42748	1.89037	2.32733	3.50756	2.69921	2.10914	1.34666	3.18342	1.32781	1.02161
ARHGEF2	20.1009	15.0716	14.1362	14.9089	16.0997	24.5984	6.05185	15.4078	14.0781	17.432	17.702	15.0435	13.4471	15.8162	12.4394	34.6606	14.8589	21.826	19.4755	33.8538	27.2084	18.215	23.3933	16.946	13.3882	16.2374	8.65843	7.72088	16.1193	12.8708	21.0238	11.787	26.5412	13.0795	9.15104	9.27304	16.277	18.5504
ARHGEF25	4.95223	38.2069	10.163	9.61017	4.44106	15.2364	5.22134	19.2599	30.7082	12.9285	5.0829	2.71181	14.0545	21.9314	5.6326	8.48697	18.8787	12.0028	28.03	16.9002	7.80305	22.7922	6.51314	8.64782	3.07563	7.03697	1.95065	3.20186	7.20111	7.09238	16.3414	8.90949	24.3161	16.4628	14.4903	19.9134	11.7379	14.4458
ARHGEF26	6.97849	4.5204	4.08556	3.39632	2.94018	3.1361	10.811	5.55903	9.70458	4.941	7.60702	5.3113	8.12884	3.48038	8.35577	4.1835	4.46872	10.8328	6.04042	3.14025	3.47166	4.8032	3.21702	3.99887	5.1709	2.48503	1.30031	3.61791	3.35913	3.10022	3.54177	4.68491	4.6129	10.3259	10.5235	2.29047	8.17085	3.86665
ARHGEF26-AS1	0	0.0709722	0.028126	0.00724303	0	0.0079241	0.0253392	0.0122786	0.0310065	0.0306044	0.0215558	0.0506603	0.0304969	0.0249034	0.0352333	0.0669159	0.0366091	0.0513414	0.0786217	0.0185989	0	0	0	0.00307242	0.0149622	0	0.0124747	0.0141473	0.00967446	0.0142686	0.0421006	0.0272955	0.0377006	0.0343649	0.0615766	0.107088	0.0704959	0.0924676
ARHGEF3	3.85865	6.81727	7.31283	8.65878	10.5171	4.62862	2.31641	3.71159	6.53514	7.11789	5.9018	16.4076	6.54765	5.45116	10.3722	8.53578	6.89946	7.13337	5.69247	13.6971	9.8121	14.6384	6.51235	10.998	22.1423	16.1414	11.3105	22.5128	5.56881	7.20823	7.92159	3.52797	12.2065	4.63917	7.13037	7.52273	8.69736	10.6859
ARHGEF33	0.131127	0.761901	0.482939	0.226165	0.0509974	0.102912	0.274063	0.312253	0.597735	0.307566	0.580646	0.326247	0.340037	0.0884994	0.15119	0.303292	0.273206	0.130239	0.463505	0.15242	0.189751	0.226017	0.0856054	0.0810007	0.151185	0.256909	0.250581	0.0621718	0.112148	0.0563223	0.223742	0.0875249	0.369908	0.0383544	0.260154	0	0.157846	0.152468
ARHGEF35	83.4914	41.2038	38.4959	72.5195	18.1967	66.1925	35.2248	62.3287	131.365	78.7175	44.9983	71.7159	55.6899	46.8331	136.247	51.5643	47.8777	212.195	100.167	58.8487	57.5319	76.568	64.5942	51.4331	1.39321	67.638	53.8687	32.911	64.9033	28.6435	60.6084	85.2077	59.6856	39.3357	66.1684	29.0851	62.3764	51.2717
ARHGEF37	1.8741	1.53393	1.68435	1.12781	2.22145	2.20964	4.23945	2.47421	1.20976	1.35957	0.642635	1.39497	2.55596	1.17705	0.565375	1.58151	1.20767	3.24582	1.71181	1.67984	3.53858	1.25281	0.518164	1.64763	2.41835	6.819	2.11891	0.866419	9.34609	3.95897	0.764261	1.11653	2.04192	2.2332	3.88542	3.62705	2.63793	2.5861
ARHGEF38	1.63204	4.54219	13.1733	4.08564	2.78352	0.25283	24.9905	7.67697	6.16304	14.8993	7.75419	9.52334	2.33522	6.85453	1.78196	7.77369	9.21742	8.75018	9.48324	3.52044	5.61354	12.5521	4.32396	2.2277	0.830313	13.8774	5.20348	5.66705	1.99736	8.18766	18.4302	1.1893	20.4538	0.194375	2.109	14.0352	15.876	6.86603
ARHGEF4	0.118059	1.82037	0.711123	0.262053	0.0641296	2.60459	0.293156	0.625714	0.00577989	0.368418	0.154319	0.0705175	0.325977	0.726726	0.430516	0.147167	0.4247	0.215281	0.876028	1.45173	0.426304	0.715079	0.266446	0.832785	0.062136	0.0157568	0.0259637	0.00980823	0.130713	0.271642	0.606008	0.190371	0.659881	0.799167	0.363352	0.352475	0.451741	0.29642
ARHGEF40	4.08148	9.79548	8.12617	4.78848	3.58685	7.87871	4.34487	6.92385	10.9772	7.67802	6.23371	2.46666	5.48771	9.19127	3.45228	4.34836	7.38335	5.52504	7.63046	10.915	4.28359	10.5185	7.59084	6.67341	3.31275	2.42557	1.71369	1.42468	2.37284	5.81407	6.80332	3.63836	10.7113	12.5729	6.41184	8.3736	6.85831	5.97474
ARHGEF5	61.9591	32.6929	34.0275	56.0021	9.53632	50.271	23.2555	53.0065	100.041	51.179	38.9745	55.5786	51.3153	34.1813	76.5953	36.7904	35.7584	138.476	77.8567	39.4914	35.7767	49.1945	37.7751	32.5289	0.862537	42.0944	32.3875	25.2931	40.6573	19.231	45.8927	68.4762	44.7762	24.6059	46.6785	23.1967	49.6993	33.736
ARHGEF6	15.6835	36.6406	21.7506	10.0242	12.2978	6.02602	11.8824	7.74763	19.6302	11.2997	24.3591	5.33339	12.4357	18.0103	16.5104	26.9277	21.1071	15.3816	33.7987	48.0199	10.8946	32.5151	60.0885	38.1702	12.9504	31.9363	17.5082	9.90556	7.68203	8.4817	14.3593	10.0527	15.1225	12.3413	12.5283	1.08393	13.2412	15.2868
ARHGEF7	16.2334	20.5212	7.16837	8.08061	7.23133	10.7985	7.78635	7.07174	11.7328	10.2335	12.8262	10.9861	17.2697	14.8326	9.57948	15.338	15.2193	11.5754	17.2497	12.3919	7.62416	11.8751	10.6726	13.372	8.46062	9.50069	8.32955	5.90936	6.82563	6.37316	13.4958	9.33753	12.2025	15.1337	14.5353	6.07068	8.19336	9.87764
ARHGEF9	1.62803	2.64277	1.6375	1.84559	1.64578	5.28632	2.0654	1.02566	5.01636	2.50821	2.55849	2.03907	1.92598	2.56947	2.70511	2.31588	2.46252	2.4283	2.9795	2.27526	2.19141	2.48091	2.04938	2.02331	2.36254	1.86905	1.72376	1.99666	2.20888	2.0278	2.93431	2.50862	3.07346	1.94989	2.78923	2.58419	2.47907	2.46162
ARID1A	33.5882	22.6824	26.7285	17.5151	11.3678	19.0473	26.0078	18.013	23.3747	25.8594	22.7199	38.6275	33.0159	18.8235	51.7573	27.4987	22.3758	27.6606	30.3124	24.5631	41.8073	26.121	22.2216	20.8046	41.4693	37.2058	40.228	27.4682	20.2694	22.7575	30.969	32.5357	22.8691	18.1068	32.7079	17.2834	27.0612	32.7504
ARID1B	8.89458	18.8255	11.2401	15.2983	7.78983	11.4177	10.3415	11.9257	12.364	17.0823	11.1024	16.4384	12.9033	13.2768	10.9669	15.579	15.9402	12.2848	19.2529	16.9624	14.7354	18.6087	10.359	15.6769	18.4882	27.1363	16.138	10.3412	17.5381	13.3565	16.3129	11.1471	13.3673	14.3669	12.5336	19.2413	12.5729	14.9003
ARID2	15.0655	17.3689	12.8688	15.4169	11.2987	7.9674	21.3059	14.2248	21.9909	24.9836	27.3621	25.1057	22.6247	19.5422	62.9921	24.3179	20.4696	20.8905	22.0419	8.75443	15.8072	10.8566	10.5238	37.897	11.6538	20.5613	12.5323	12.8171	13.5857	11.1711	16.3939	19.0744	12.4412	8.71447	25.3329	5.8212	15.1203	16.3698
ARID3A	2.66831	1.5678	1.36769	1.93964	0.930889	1.54654	1.22016	1.80925	1.11977	1.93049	1.27526	1.32706	2.00895	1.64028	0.243394	1.32264	1.35508	1.56056	1.46531	1.57837	2.01386	0.847577	1.00964	1.15232	1.395	1.368	0.865966	0.637259	0.333453	0.701476	0.77485	2.50596	1.07296	2.06378	1.64247	3.02979	1.06971	0.922388
ARID3B	1.08268	2.13502	1.26014	1.29557	1.37569	1.46765	1.29131	2.87545	3.09402	0.895511	2.43574	1.96341	1.93752	2.78542	0.545201	2.01648	1.50064	1.40634	1.6041	1.26412	0.930909	1.30956	0.963196	0.719753	0.812866	1.18327	0.8103	0.557712	0.849587	0.561401	1.14666	2.29186	1.53249	1.46837	1.26477	1.30833	1.32143	0.999841
ARID3C	0.011144	0	0	0	0	0.21264	0	0	0	0	0	0	0	0	0	0	0	0	0	0	0.0249891	0.0421564	0	0.035162	0	0	0.00711475	0.00809171	0	0.0164238	0	0.034816	0	0.008515	0	0	0.0543678	0
ARID4A	5.93307	11.9928	7.28244	7.42774	10.0511	5.93221	10.5921	13.5032	15.5879	16.6895	14.4977	16.3824	11.532	16.66	25.2546	11.9654	13.2821	16.8962	21.3475	12.2114	15.0049	8.69202	7.75482	10.3923	6.49626	10.385	8.44016	7.01729	8.86027	7.94889	12.9155	12.161	12.8314	8.96687	16.3806	8.50942	15.3965	13.9211
ARID4B	20.5289	23.2876	18.5283	23.931	19.2243	17.531	19.6825	20.8454	32.5062	27.9815	32.1799	48.114	25.6239	25.8736	66.8403	45.8246	23.7864	37.6004	32.709	22.4835	25.4622	19.4276	24.4204	21.2957	36.1428	24.9067	25.5901	20.0508	26.9102	17.3141	27.1866	26.2534	24.7085	21.8965	26.5917	15.6403	26.3585	33.1419
ARID5A	4.54962	5.5668	3.09403	2.94977	2.75126	4.83624	2.92585	2.50314	8.77902	4.58472	9.43812	2.83164	3.59611	5.67246	2.60621	2.57367	6.07409	5.79561	6.91824	6.60883	5.75262	6.33918	6.31066	4.06441	3.22745	8.74045	6.6102	1.08094	1.47317	1.99915	3.39216	3.15835	7.03219	8.33685	4.03892	7.41165	6.24119	4.87271
ARID5B	5.1089	16.1723	10.1685	4.84541	5.97109	8.97284	8.66032	3.81446	14.6811	10.8882	8.71782	15.9071	8.3614	11.891	18.3562	12.1868	20.2973	11.9481	31.942	12.4171	9.1935	14.5657	10.2462	16.5363	9.39524	12.9735	13.6297	9.42327	20.4937	7.74446	10.5291	5.61215	16.6819	12.8285	9.47261	9.3154	11.9961	10.4627
ARIH1	16.5458	13.4897	6.96116	5.92453	8.74962	9.37161	7.70392	8.66273	11.6294	9.96315	11.9746	15.5126	10.3382	11.4324	9.36807	11.5908	12.1969	6.6188	13.9516	11.6815	9.68561	12.9973	14.3478	12.3042	9.29499	11.6253	12.7948	10.6337	10.1574	10.2389	9.61982	12.4999	9.09946	9.0863	8.47103	11.0966	8.45013	8.67224
ARIH2	15.285	15.2712	6.68712	12.1304	9.31638	10.8964	19.6645	11.4394	15.7197	17.9576	14.4894	10.3067	14.9738	13.581	16.4631	14.0016	10.6706	21.8099	16.229	10.914	7.49295	10.166	7.53319	6.46187	10.3148	8.59628	9.65881	8.98958	7.84457	8.40965	11.2474	12.7301	13.5066	14.9984	7.77068	17.4502	10.2044	9.57853
ARL1	36.8099	9.28787	8.8566	10.5387	41.995	8.31778	13.6402	6.15977	9.24556	17.3179	14.5666	19.0193	28.0852	7.07492	26.6503	13.902	15.4749	14.1652	16.6133	16.5471	57.1439	23.51	55.9162	25.5998	33.5474	32.4528	37.8957	76.9203	34.8859	50.5642	16.4476	12.1843	12.1088	10.6409	14.4315	5.61062	13.4801	14.8115
ARL10	0.391425	0.767739	0.896438	0.377442	0.260473	0.507354	0.353403	0.899074	0.00896585	0.348622	0.314245	0.337345	0.286829	0.168791	0.74518	0.183485	0.432772	0.357974	0.369824	0.431343	0.261061	0.432605	0.115835	0.340627	0.215918	0.0914634	0.0915029	0.0345972	0.214544	0.228844	0.501807	0.426066	0.5454	1.17657	0.287496	0.867371	0.358771	0.222173
ARL11	0.16422	0.0685591	0.00597213	0.0441953	0.0404032	0.0914725	0.236333	0.19204	0.0619419	0.0728153	0.183744	0.160254	0.285301	0.262789	0	0.0334589	0.121345	0.124769	0.0488866	0.154733	0.0368464	0.0209898	0.0754943	0.0788078	0.104546	0.0508269	0.145374	0.138483	0.442517	0.278905	0.238046	0.203976	0.0993659	0.129732	0.0481758	0.0343391	0.0561203	0.0365456
ARL13A	0.0781807	0.585196	0.276092	0.5501	0.13628	0.250937	0.342657	0.741838	0.274478	0.778689	0.424021	0.381855	0.357736	0.116567	1.00243	0.620569	0.287302	0.346693	0.39694	0.0923396	0.0974134	0.0280374	0	0.0383798	0.0885373	0.0632194	0.133473	0.0126197	0.010372	0	0.189842	0.150756	0.160529	0.315192	0.229482	0	0.348196	0.294347
ARL13B	2.52342	4.4666	3.12153	2.67427	4.32715	7.33504	1.71921	4.03132	4.49622	5.38928	4.73041	4.67389	3.06578	3.8574	10.6511	3.86821	5.32225	4.7453	8.1114	3.71981	2.96355	3.99442	7.86358	5.01434	4.32057	3.30762	3.78227	4.68167	2.16895	3.99523	5.41901	2.35657	4.96624	2.22123	3.8071	0.982524	4.03759	5.40312
ARL14	0	0.0154947	0	0	0	0.0848193	0	0.156916	0	0	0	0	0	0	0	0	0.0175122	0	0.0563147	0.00679659	0.00795978	0	0	0.0201603	0	0	0.0136011	0	0	0	0	0	0	0	0	0	0	0
ARL15	2.99438	4.23632	1.35358	2.93754	6.08222	1.071	1.32714	2.73316	0.770678	4.2159	3.21417	5.04731	3.52192	3.09725	3.50587	2.33231	4.2884	1.65168	3.01401	5.8453	5.28551	7.01126	4.6844	6.37945	3.64935	5.42939	1.23607	5.06634	2.11173	6.83583	2.47828	2.09571	2.73699	1.78471	3.56566	1.28634	1.85927	2.28593
ARL16	3.90994	1.21744	0.948998	1.61176	1.65025	1.4966	2.33664	0.951294	1.8255	1.29826	1.327	2.03698	2.29509	0.766302	0.663984	2.01709	1.37649	1.42391	2.1672	2.16461	1.64936	1.34246	3.01885	2.78496	6.78528	3.54296	2.8464	4.81493	1.57239	2.15603	1.93568	2.83265	2.20936	1.53457	2.79557	4.00589	1.81994	1.92327
ARL17A	8.79259	38.8123	11.3765	15.7654	6.11027	19.9643	19.6122	10.1041	63.7565	32.0487	23.3117	14.5178	40.1148	44.6126	48.1668	10.4651	26.1406	55.3683	13.6344	9.79489	6.01928	4.2083	4.92025	5.9444	7.41947	5.48879	5.70359	4.36983	7.50399	3.18003	12.3243	17.4331	20.1393	11.0332	23.75	4.2536	14.6751	19.5691
ARL17B	38.5145	50.8537	80.6058	52.7515	40.9184	36.4228	44.9081	53.4698	82.0346	162.177	83.0285	54.584	110.214	111.022	52.3599	38.1654	91.7097	64.2435	44.1455	41.5876	43.371	26.46	28.5794	23.043	35.1586	37.8602	34.083	39.1715	32.0825	26.2798	63.531	62.9238	59.3711	87.7749	100.422	70.8579	53.539	34.903
ARL2	17.9615	8.25601	5.45577	7.40067	9.60945	9.09607	10.5862	7.33648	3.94495	4.07579	6.72456	7.1926	7.00523	8.96317	0.365508	4.88215	9.32985	3.74612	8.30321	19.2602	7.92168	14.6018	14.3189	13.81	19.2849	8.73132	13.6373	10.5989	8.96367	16.5224	7.1985	9.6489	6.68815	9.13326	6.36412	9.63944	6.85061	6.27127
ARL2-SNX15	5.23063e-06	0.000135976	5.23453e-06	0.000262551	4.67533e-06	0.000288067	0.000117227	2.28366e-05	0.000902413	1.1064	8.25491e-08	6.95369e-05	0.000153217	3.75117e-05	3.37867e-09	9.84241e-05	7.58712e-05	1.36075	0.000489982	9.48181e-12	6.07578e-06	0.044767	4.62956e-06	4.46878e-23	1.21273e-05	0.00015856	2.0497e-06	1.33539e-05	3.23788e-05	1.30354e-05	1.67943e-06	8.67185e-06	2.58638e-05	1.86061e-05	0.00463666	7.0453e-24	0.0004074	1.92206e-05
ARL2BP	19.5863	10.3246	7.4252	7.13902	12.5082	16.0783	8.10677	7.79785	5.34828	11.2928	13.0133	6.27698	7.76818	12.5755	11.1495	9.78339	12.38	7.48385	10.9696	11.9815	14.1779	14.248	22.7134	16.5379	22.3076	8.74969	22.6307	10.4983	22.2181	19.1332	10.8113	11.4952	8.30204	7.55648	8.43412	6.85376	10.2339	10.5343
ARL3	2.98874	1.25092	1.25644	2.26109	3.4419	1.15284	2.21503	1.52194	1.61077	1.47246	3.23042	2.09492	1.76661	0.982248	6.40397	1.04259	2.09652	2.52114	2.31785	1.53188	8.61273	2.44216	6.98633	2.47809	4.70904	9.15014	1.63554	10.9562	4.64691	5.88285	3.19289	3.0742	2.08328	1.03641	1.03984	1.15712	1.03053	3.06453
ARL4A	1.09987	3.53818	1.80207	1.0016	3.29221	1.86221	1.8619	2.30051	2.34845	1.76761	1.71944	0.986518	3.81568	2.38259	1.14366	3.0332	3.21341	2.13325	5.27893	2.62079	1.72674	2.74119	2.21619	1.83256	0.99397	0.450848	1.07894	0.616368	2.28051	3.2982	1.73134	1.01427	1.57347	1.22225	1.87254	1.00935	2.02251	1.90469
ARL4C	1.84586	1.59476	3.7619	2.35253	1.06811	4.58004	2.11319	2.34864	3.80124	3.99693	1.50635	0.287036	1.41687	7.97407	0.0168322	1.98889	4.69577	2.56966	2.62415	1.60814	0.601838	1.4241	0.821447	1.74155	0.980924	0.461326	0.609848	0.144016	1.45282	0.775546	3.26602	2.57978	2.28442	6.12598	3.4625	2.53204	4.41752	1.83477
ARL4D	0.536884	0.147568	0.641934	1.11255	1.00573	1.02432	0.994107	1.37407	2.68298	1.76561	0.451864	0.634314	0.518777	0.0526499	0.119322	0.611885	0.624784	2.95566	1.12812	2.01697	0.783953	2.83235	2.38887	1.05368	1.12809	0.549461	0.6223	2.30951	3.13483	1.91805	0.801207	0.0927574	0.675195	1.01804	0.976286	0.44661	1.18261	0.477274
ARL5A	4.59777	5.80065	3.54627	4.52456	4.64141	4.41774	7.85985	3.69687	8.664	7.85318	7.77673	13.5188	5.40548	6.10744	18.1779	7.50151	6.39704	6.09038	7.43203	5.12551	2.98715	4.65562	8.24554	7.60046	6.16587	5.26568	5.47865	9.703	5.3168	5.6448	7.47896	7.58169	4.74499	4.74605	7.90901	1.95164	4.2569	7.82092
ARL5B	3.34939	2.17091	1.84899	1.36604	3.56074	1.59259	1.15738	1.75243	1.71344	0.840579	2.04719	2.29753	2.18306	1.2186	2.02512	1.81621	2.07283	0.424198	1.57679	1.61638	2.89455	1.90742	6.41433	5.71523	4.33462	2.16972	1.58194	2.31195	1.21334	2.77552	1.90222	2.30203	1.31007	1.11918	1.48756	1.25649	1.05332	1.41167
ARL5C	0	0	0	0	0	0	0.0879728	0	0	0.116534	0.0190713	0.0209583	0	0	0	0.0217005	0.0252087	0	0.0202369	0.0298051	0	0	0	0	0.00874833	0	0	0	0.00929365	0	0	0.13119	0	0.0116599	0.0570313	0	0	0
ARL6	2.51929	2.69528	0.976633	1.67502	2.58692	3.28858	0.510475	0.049484	1.87947	1.23479	1.34052	1.59634	1.34536	0.887546	2.88259	3.25974	1.40964	2.15355	2.36884	2.23802	1.99034	2.29404	4.79459	2.02272	2.2288	1.67058	3.94493	2.6668	1.8503	3.1369	1.48677	0.918714	1.20883	0.40875	1.41749	0.0126087	0.835772	1.33378
ARL6IP1	49.1831	9.70913	25.3728	20.1402	35.7335	32.8744	34.6341	29.2147	7.93992	11.0174	16.3398	25.0584	36.5633	11.2252	15.6954	25.4971	13.6801	11.5315	16.1106	31.7964	58.2646	18.7955	48.3706	42.5842	57.6911	96.1806	50.1253	46.7935	35.2878	42.9679	33.2867	30.1217	26.2261	20.9062	21.9801	15.1005	21.0311	45.2913
ARL6IP4	45.1099	18.5795	15.0208	18.0921	31.4914	16.979	36.7912	49.4133	15.9329	19.0011	16.0309	21.0684	23.7967	21.7167	14.0501	16.7642	15.9603	16.6593	26.005	29.6731	105.459	24.6898	38.5088	23.8873	61.438	42.6334	43.5441	45.2907	31.3724	43.1495	22.5027	23.6407	25.0853	34.9624	23.593	33.5382	21.1629	21.5133
ARL6IP5	23.6072	24.5363	26.9048	16.9268	52.6118	18.0856	17.8195	14.6645	26.7057	12.9461	21.7933	27.2104	13.9517	25.0385	14.419	29.9726	17.5719	13.9301	14.2761	52.1057	22.1444	30.4207	51.5889	44.7039	34.2147	41.4987	25.0576	48.4175	42.104	68.6656	19.2781	12.4831	24.4575	21.3083	9.03049	20.7339	22.0911	18.6919
ARL6IP6	3.2069	1.63873	2.36853	1.2783	1.44453	4.27119	3.61985	3.29444	1.89313	2.00327	1.62776	4.55105	2.4124	2.63875	3.51747	3.61331	2.64623	3.28587	2.59127	3.07942	1.37893	2.43396	4.5902	4.31359	3.26988	4.49098	3.40222	4.25517	2.32485	3.6271	4.0613	6.9379	2.49193	1.8918	4.60835	0.56553	3.11433	3.53911
ARL8A	72.7706	17.4495	24.0868	26.8161	18.5721	30.2917	24.6506	28.4578	11.2226	18.5925	32.0551	35.7998	34.7076	27.1055	8.58094	35.2348	23.1919	11.9442	31.0092	46.5879	78.348	35.5427	51.4222	54.9839	68.9212	40.5933	54.0385	43.9837	51.9532	44.8608	33.8091	56.7524	31.2618	32.6019	32.4066	13.8383	27.8417	31.5169
ARL8B	36.6483	6.72623	7.45165	6.52265	10.1669	5.50444	8.85044	9.64107	4.6278	4.7353	8.08848	7.23126	9.28047	7.81896	6.46674	5.78593	6.28319	1.94715	5.48842	12.1737	9.86974	15.8886	21.7678	9.66546	8.24644	15.9165	8.77199	18.1386	13.0269	11.5867	6.86459	13.1154	4.71556	5.26694	7.46454	3.46111	5.75112	5.36492
ARL9	0.288767	0.384606	0	0	0.162365	0.0279755	0.555595	0.921579	0	0	0.263919	0.241803	0.430853	0.0215409	0.0306036	1.27482	0.290753	0.789769	0.279889	0.219425	0.148315	0.0889321	0.0987908	0.318726	0.254434	0.0655927	0.33277	0.117821	0.064805	0.588595	0.0128144	0.356603	0.080227	0.482555	0.30821	0	0	0.172275
ARMC1	8.21993	2.22443	1.93119	2.85064	3.97239	6.83939	4.44299	2.64346	2.77026	1.67288	2.85153	2.89832	4.36827	4.0497	4.78706	3.31022	2.84381	1.25616	2.67907	3.50197	3.53165	3.22685	4.32163	5.01875	5.38508	3.76712	3.53107	4.60361	4.07067	3.94412	2.48668	8.13669	2.55549	1.33942	3.31365	1.30406	2.35547	2.76374
ARMC10	7.97383	5.08704	3.94871	4.29379	9.91538	5.12349	7.14821	4.8812	8.67556	8.79002	4.71022	8.81324	7.80749	3.19124	11.2237	9.45321	5.57774	7.92696	5.98507	5.06665	4.89426	6.00358	9.19255	8.40871	4.80215	8.52094	7.97924	16.2481	6.41913	8.59686	5.99067	10.9866	4.03357	3.23947	6.30178	3.32264	4.66045	7.60454
ARMC12	0.095497	0.605379	0.0837332	0.191578	0.200894	0.246026	0.549658	0	1.67694	0.0727457	0.414437	0.130041	0.339978	0.0147047	0	0.185573	0.430325	0.312494	0.487292	0.106713	0.0535322	0.096909	0.114647	0.0225974	0.207832	0.249652	0.12188	0.112666	0.577729	0.0616159	0.146508	0.0836448	0.304675	0.354548	0.0800153	0	0.0929058	0.426054
ARMC2	1.31315	4.05204	3.07759	3.53182	2.08712	2.01744	2.33534	4.25581	3.78414	3.34135	1.91738	3.74886	2.2292	3.75278	5.0223	3.1671	4.44871	1.56138	5.01976	3.14524	2.17364	2.51419	1.7507	1.85811	1.5909	1.73833	2.53585	2.19204	1.5268	1.86455	3.33521	1.91739	2.04999	2.33058	2.4563	2.29121	1.75257	2.15477
ARMC3	0.411855	0.0398892	1.5226	1.18734	0.195336	0.0146009	0.326953	0.780819	0.0228695	0.16217	0.192851	0.0933065	0.20604	1.03885	0.560224	0.194651	0.29969	0.0270428	0.337939	0.909538	1.05792	0.019115	1.14002	3.71965	3.05234	1.11642	2.15508	0.172451	0.120135	3.07158	0.386067	0.201202	0.130536	0.0774057	0.312922	0.0871277	0.0582285	1.10642
ARMC4	1.04695	0.723209	0.623578	0.10361	0.430368	0.0794564	0.311542	1.12269	1.0826	0.0109705	0.207058	2.48802	0.800861	1.97545	0.669941	0.216807	0.459686	0.70522	0.473511	0.264865	0.76227	0.108965	0.169652	0.269246	0.100682	0.388154	2.0746	0.0705632	0.208751	1.78944	0.0743144	0.0642617	0.448675	0.147773	0.149759	1.70165	0.132317	0.486094
ARMC5	1.28318	1.49855	1.40019	1.39362	0.702315	2.72877	1.57195	3.36048	1.25648	1.57294	1.23646	1.87061	1.45311	2.91748	0.593023	0.928274	1.13291	1.34097	0.672827	1.54916	1.36214	1.46961	1.08175	1.23007	0.966801	2.55465	1.40493	1.13501	1.07861	1.64214	1.29752	0.959239	1.90734	2.55995	1.07514	2.67809	1.68241	1.28647
ARMC6	9.38753	2.1263	2.5712	3.28775	4.48729	7.61139	13.663	3.97965	2.82637	2.58115	2.60556	2.85797	4.00161	4.04801	2.46754	2.07476	1.92545	3.47339	2.22453	3.41338	2.92988	3.11114	3.34645	3.15286	6.37472	2.45332	4.02908	3.4371	3.35301	4.29903	2.90079	3.19143	3.73272	3.77955	4.45249	4.19133	2.9168	2.38811
ARMC7	1.99652	0.214507	1.34822	0.708988	0.548605	1.28473	0.465399	1.96583	0.163375	0.605535	0.351	0.870545	1.22462	0.83827	0.326548	0.601802	0.463682	1.3867	0.511245	0.832763	0.429773	0.47931	0.480598	0.683672	1.73637	1.0075	0.751649	0.945212	0.465613	0.603733	0.617133	0.776705	0.474831	0.741533	1.36194	1.25974	0.734102	0.382443
ARMC8	10.1901	8.33514	6.04592	6.27208	11.0042	9.72337	6.87364	9.04668	9.34232	7.0611	11.7256	7.38366	8.26356	5.68879	7.02174	9.90237	9.587	6.88199	9.53889	9.3166	8.38853	9.7612	12.9132	10.1859	10.1723	9.97325	7.68176	15.7598	8.96616	9.18113	8.71514	9.49674	6.88323	5.46945	9.35445	3.08121	6.90265	6.67687
ARMC9	13.6954	14.0499	12.5231	14.3717	12.1425	17.1056	10.5325	15.767	17.0184	19.0203	17.6512	8.19764	15.3916	15.6847	7.37836	9.77667	18.4066	17.3132	13.4151	10.3128	12.2278	17.3527	6.97846	8.719	11.6605	28.6218	19.3317	10.9046	11.0437	13.0913	23.3654	19.1621	19.0948	12.5521	16.9613	6.67039	15.1304	14.0873
ARMCX1	10.1848	9.46741	8.46188	6.77867	15.6026	1.69066	4.81612	9.67381	12.6685	9.63582	5.58856	15.5727	5.90101	5.60991	16.4549	6.92678	7.74425	10.3505	8.98398	5.52407	8.06873	7.34422	4.81707	12.1648	4.1347	6.80224	7.79456	11.9414	4.46674	7.0815	7.06531	5.42269	8.38746	4.09004	4.1819	18.7298	4.68895	6.7866
ARMCX2	4.39551	5.51836	7.7397	6.26082	6.91113	1.56261	1.26725	2.8997	9.69777	7.94258	5.14118	6.3323	5.49598	3.77764	8.46872	7.87626	5.3833	8.79755	5.59124	3.26653	4.18882	5.00438	4.37301	5.50199	1.26216	1.32711	0.50756	9.93734	4.60121	7.51019	4.56255	4.63678	7.23137	1.84206	3.88731	9.6245	4.1721	6.02277
ARMCX3	2.22996	2.98498	2.93125	2.51822	4.01978	2.01031	1.18282	1.69219	3.05692	3.78445	2.87429	1.85241	2.04423	2.79808	3.43186	2.06388	1.73481	3.33492	1.94443	1.23134	1.365	1.95179	2.0297	1.50962	1.25535	1.29656	0.19959	2.26257	2.31266	1.80037	1.45869	1.42393	2.28783	1.40644	1.87413	1.83161	1.8388	2.24434
ARMCX4	1.62751	6.08514	3.44547	3.66204	1.13954	1.18011	3.11264	1.49385	7.44817	7.7955	3.5524	8.3259	1.84319	3.87627	6.21685	2.40075	3.43447	9.88158	4.66688	2.70636	0.74871	3.3117	1.15688	1.95239	1.03171	1.51492	1.17944	0.805012	1.31017	1.27939	2.55789	1.92273	3.68045	1.54796	1.18207	6.48146	1.9733	2.62588
ARMCX5	2.78818	5.32042	2.48966	3.56156	4.55033	1.89086	3.60313	1.67362	7.3006	7.02902	6.92304	4.77571	4.98952	2.42831	10.2806	4.89862	3.92934	10.681	4.27671	1.37628	2.43787	2.21434	2.47934	2.33527	1.72727	2.78238	2.05913	5.03017	1.89073	2.2821	3.16576	2.3868	2.96568	1.89647	4.24287	2.73223	3.44737	3.56834
ARMCX5-GPRASP2	5.55269e-40	4.92441e-33	5.45765e-36	3.48054e-39	1.37708e-41	2.94544e-35	0.0812668	9.9587e-36	1.46289e-42	4.68692e-42	2.95529e-43	0.0751672	3.42338e-41	1.23583e-37	2.7433e-43	0.0782271	2.66573e-38	5.57164e-45	2.07068e-40	1.96883e-38	8.56663e-41	2.04703e-42	2.40986e-38	3.74318e-41	0.0295978	2.73363e-40	9.31919e-41	1.24068e-44	7.93193e-41	5.97036e-40	4.49738e-42	1.15474e-40	4.82787e-39	5.62941e-39	1.18431e-33	1.07571e-38	5.41528e-41	6.31134e-32
ARMCX6	3.23359	2.59208	4.59883	4.6563	4.39976	3.78907	2.38417	5.43004	7.16684	7.94509	5.81192	4.98504	4.73865	5.10343	4.41933	1.45288	3.5291	10.2711	5.64188	2.82121	7.09449	4.39764	3.44506	4.39178	6.09861	7.26194	1.60342	10.7637	6.72889	4.85811	6.19972	6.35859	9.25014	3.16771	5.15458	19.8388	6.49384	7.13656
ARMS2	0.113159	0	0.803941	0.674861	0	0	0	0	0	0	0.435672	0.0756418	0.0249397	0	0	0	0.0303153	3.3944	0.510575	0	0	0.0620506	0.0919254	0	0	0	0.0119851	0	0	0	0	0	0	0	0.136611	0	0	0.139659
ARNT	14.5061	14.9903	13.3802	12.2788	12.5669	9.90757	8.28546	7.65276	12.3871	10.958	10.9733	18.1085	12.62	11.3344	13.6729	16.7444	18.4962	12.8284	22.8422	18.9056	12.5937	18.9513	18.1072	16.8695	10.6804	21.7427	21.0722	17.0464	20.8701	18.9383	21.4135	9.90718	19.7315	10.2944	11.9209	11.6168	15.5082	19.3673
ARNT2	4.6334	3.57727	4.84024	5.32987	9.58546	0.446154	0.328176	4.34334	10.5899	10.393	70.1316	5.75779	4.72115	1.92201	1.28031	7.28322	1.68075	3.75409	1.49763	2.43489	12.1893	3.90113	9.5794	0.829524	3.3983	19.0047	18.324	6.98454	3.23003	2.98503	8.41157	0.710063	3.21959	4.22071	2.44841	11.392	1.71863	3.14123
ARNTL	4.55285	5.40121	4.73717	2.7051	3.94096	13.61	2.47833	3.07689	6.76241	7.09893	4.05165	2.44261	7.64741	3.30291	6.99521	3.4943	3.55829	3.163	2.81825	2.73546	4.49822	2.80045	3.11859	4.37748	4.69378	6.12972	2.70288	4.10564	7.06968	3.70817	7.25673	2.84846	3.04784	2.72935	3.17557	1.87703	3.16129	3.2534
ARNTL2	0.417779	0.908152	0.513011	0.49889	0.612288	0.700981	0.661232	0.377967	0.767005	0.362539	0.766242	0.0769657	0.243504	0.599602	0.246691	0.451589	0.751733	0.807866	0.830984	1.30624	0.332945	0.417276	1.09419	0.929888	0.487419	0.219593	0.164966	0.0669316	0.59765	1.45595	1.04532	0.442765	1.80686	0.495139	0.505355	0.132056	0.572352	0.397163
ARPC1A	80.715	25.7505	27.1025	25.1817	43.2227	51.1962	64.2402	30.6616	39.522	35.3452	23.2413	35.7451	42.9998	29.9435	41.5254	46.9129	29.7963	40.8144	41.7715	47.9035	84.2105	53.1733	109.487	76.5167	63.0477	61.7456	87.4937	164.033	76.4558	83.4752	51.8258	102.605	43.1632	37.037	54.2591	34.0607	31.6053	37.2547
ARPC1B	87.9987	12.9811	23.3831	23.0322	40.4117	37.1448	46.6349	37.415	15.4215	21.654	12.4702	7.91005	25.0962	27.3104	8.39433	20.9251	23.9353	10.8062	10.5378	50.7956	31.0307	34.0438	40.6115	46.5501	32.6831	19.4782	47.9584	35.4951	35.6506	92.965	26.5918	70.6278	23.691	34.0421	18.2662	33.7114	21.1483	19.0596
ARPC2	135.027	75.8276	72.5684	78.4884	103.502	115.049	91.3495	64.2895	74.1929	81.182	85.3674	42.1005	63.611	78.1168	84.6394	102.749	117.442	60.3825	87.4724	108.737	84.5329	94.0236	108.41	161.047	224.585	104.312	115.922	137.208	151.986	185.486	129.272	107.723	82.4196	68.3357	92.9661	45.1631	98.2853	89.6458
ARPC3	527.772	167.079	190.704	307.494	722.103	369.662	351.243	253.633	251.98	240.643	282.584	235.036	488.395	227.26	320.45	356.302	292.103	207.485	189.407	407.195	602.082	339.509	745.654	333.171	757.984	384.452	513.528	663.32	583.37	712.477	315.956	299.442	222.316	275.265	241.936	168.313	271.949	315.172
ARPC4	41.0077	11.2541	14.5063	12.5525	26.9119	18.233	14.2962	17.1623	11.3015	9.34864	13.027	15.5003	15.728	9.43002	6.75145	19.4006	13.9495	4.53868	11.498	28.8973	16.9765	0	39.645	25.1321	22.7822	22.1263	22.64	30.6758	24.2851	37.8644	18.3143	33.3566	16.3976	15.8852	0	8.76563	15.9093	15.2121
ARPC4-TTLL3	0.844052	6.75351	4.92958	4.36424	1.05534	4.63101	6.28943	4.12316	5.51873	5.58453	2.7119	2.56212	3.91673	6.94998	1.7793	3.44605	5.22687	3.28606	4.05807	2.44967	0.913534	0	0.730981	0.446123	0.762589	1.2705	0.341645	0.621821	0.222898	0.490203	2.9406	3.23304	4.2498	3.16924	0	1.0123	2.89952	2.24978
ARPC5	20.0167	6.73262	5.18039	9.69025	19.8514	19.5506	9.17247	11.5254	4.46573	5.47613	5.41562	8.53302	8.94411	10.2737	9.65255	9.39593	7.48061	4.96098	7.11105	17.8517	14.2144	11.1132	16.1402	21.5923	15.0969	12.9185	22.0822	14.0552	14.7195	19.7636	11.4845	13.4123	9.91381	13.0029	7.71391	9.78222	10.5164	12.2365
ARPC5L	49.5339	6.703	6.65464	8.48023	13.0172	19.5169	9.54834	4.78639	1.58141	4.54004	9.79179	7.40531	7.36016	8.86273	8.31952	10.8749	7.19994	4.49829	4.48332	9.83868	19.3027	10.812	22.1428	19.7991	52.4705	16.3362	15.9546	17.8236	13.4518	14.0384	7.27552	13.0673	6.69947	7.31842	6.23898	6.46968	6.64336	6.20567
ARPM1	0.135649	0.543193	0	0.0478538	1.28013	0.37636	0.0381482	0.137499	0.152276	0.241997	0.0650969	0.133907	0.143066	0.262171	0.893002	0.39056	0.257992	0.202788	0.328814	0.19761	0.193197	0.190321	0.226122	0.236509	0.137361	0.376175	0.0992559	0.370792	0.254369	0.218098	0.232008	0.056563	0.17472	0.2517	0.19191	0.538339	0.397699	0.142247
ARPP19	13.5035	6.47285	4.4186	4.1059	5.76519	5.94408	7.53994	6.57396	9.41332	8.16355	9.96189	10.9822	10.4976	6.85595	17.9425	9.82286	6.85823	8.56733	13.6971	7.43959	6.63104	6.04787	11.3973	10.3934	9.70588	12.6987	18.6771	11.5905	10.7115	9.99842	11.7837	16.1138	11.5099	7.8161	13.2783	6.66205	9.37016	12.3912
ARPP21	0.0115269	0.165827	0.0764374	0.0975041	0	0	0	0	0	0	0.0341414	0	0	0	0	0	0.130137	0	0.00518989	0.073399	2.89946	0.0245804	0.0725506	0.0145563	0.118056	0.0349741	0.00585217	0.00279296	0.00916384	0.759761	0.0312088	0	0	0	0.0325521	0	0.0312582	0.21337
ARR3	0.0104496	0.867252	0	0.0306191	0.0234349	0.19991	1.22641	0.0128437	0.550697	0.640986	0.143136	0.457168	0.285009	0	0.919448	0.445253	0.292307	1.69945	0.414723	0.14672	0.0156222	0.0394784	0.0437688	0	0.0175892	0.0285109	0.0133485	0.0151767	0.0187238	0.0230873	0.287857	0.0900302	0.182103	0.13613	0.313207	0.418781	0.255562	0.283914
ARRB1	10.6891	6.02649	2.56279	2.74143	4.01799	1.40424	3.29631	3.48908	5.89937	7.61735	3.58058	5.18109	5.83274	6.13343	2.16032	3.15886	3.64584	2.27757	4.95773	7.10533	5.04747	4.9748	8.36966	6.1063	3.83507	18.5092	11.7755	4.30649	13.6538	4.252	2.50309	3.32354	3.61021	3.7939	5.18211	2.7124	2.69818	6.23658
ARRB2	17.991	17.7311	17.9597	14.8174	16.9236	18.9286	29.5146	32.532	32.5294	13.8191	20.9018	10.0441	20.743	35.4435	8.20672	16.0919	33.0477	16.5171	18.1219	45.7967	13.4192	11.8489	14.9586	17.4224	23.7894	13.7492	26.3813	16.9019	18.189	15.8071	22.5427	19.2266	24.1432	37.9618	18.5023	20.7755	16.3776	16.2816
ARRDC1	21.2112	6.14237	7.8863	8.26917	6.01592	10.7263	30.4961	27.8676	8.83706	9.04573	10.5703	8.8405	14.9218	8.29772	5.39607	17.2173	6.6595	11.8292	5.50148	6.19119	10.6134	8.83763	5.9014	9.76842	12.5457	14.7331	16.0901	17.3701	17.281	13.7235	10.5281	13.5535	11.4379	8.34835	23.6059	17.8345	10.8027	11.8978
ARRDC2	1.97173	2.74718	1.91067	2.52189	2.58943	2.97026	1.64501	2.71407	3.14672	3.19438	3.38098	1.50057	3.64023	3.28447	1.97857	1.7586	1.80547	3.4884	1.68875	4.34794	1.19432	4.2268	0.816661	2.07698	1.33329	1.8989	1.40837	0.773442	14.5174	1.39078	1.50075	1.97852	2.38128	8.17441	2.7059	4.73675	2.28527	2.02108
ARRDC3	5.70246	24.8832	11.4806	8.51187	15.4572	13.3166	6.8063	4.90629	16.3808	14.5096	11.6963	6.20194	12.3163	15.4093	19.2928	8.403	20.8043	17.2295	24.5011	13.8339	7.72384	33.1692	17.2537	21.1518	7.84157	6.00847	3.67767	13.1756	8.052	9.68663	10.7522	15.2457	13.8036	11.4851	21.7297	1.80985	20.4145	17.353
ARRDC4	0.925537	4.00815	3.16037	1.24	2.88161	0.838261	1.38466	2.46743	1.5061	1.62564	2.11291	16.5912	1.9852	3.65871	3.87981	2.0002	4.29531	0.925042	2.72801	2.94977	1.10168	2.42792	2.95224	1.52219	1.16357	1.34643	1.3215	13.1262	1.57226	2.63431	2.67731	1.27969	2.61276	0.916175	1.18516	0.352364	2.25495	1.23621
ARRDC5	0.0404135	0.889543	1.42583	1.38283	0.253549	0.936086	1.97765	1.00441	4.24839	1.57824	1.29715	0.32252	0.622747	5.27429	0	1.45806	2.50376	1.67777	1.41117	0.742219	0.344446	0.299671	0.0673703	0.188767	0.194703	0.0882387	0.149926	0.0234864	0.414916	0.190105	0.866996	1.22082	1.0632	2.52109	0.697216	5.87105	2.04222	0.708184
ARSA	5.63055	3.08727	5.88799	2.92879	5.14454	3.23965	4.83006	7.84181	1.83987	4.00997	3.41773	4.75748	1.63731	5.04499	2.20155	1.78721	2.47439	10.906	1.79648	4.9824	2.22601	7.49436	4.56407	1.97678	1.81259	1.15805	7.4485	3.54114	5.09518	3.2087	3.50497	4.86086	6.3341	9.05248	2.44223	36.9709	3.28221	3.23139
ARSB	5.40023	6.52386	7.68213	7.39721	6.92659	6.9536	3.72595	7.00271	4.26057	4.95476	3.88493	1.47187	4.17574	6.39862	3.57682	5.54373	8.10962	3.79653	5.56283	10.411	6.02929	10.7263	7.78202	12.1185	8.91783	2.50635	5.91246	2.74657	6.1692	12.6676	9.77866	5.12449	6.53389	8.43467	4.03354	3.02954	7.25953	5.55237
ARSD	5.46423	2.16795	8.17857	3.68306	5.33256	4.91701	3.88786	7.87646	3.47436	3.97888	7.21308	12.1862	6.19505	3.83658	5.02268	10.3626	2.91934	5.59937	3.21218	4.56609	4.52953	8.20922	7.42791	7.56714	4.06368	8.6056	4.65082	12.1201	10.091	4.253	4.33491	4.25096	4.92555	5.31055	5.74091	13.799	5.82936	4.39505
ARSE	0.282755	0.622892	1.23553	1.73904	0.839709	1.1424	0.79495	0.724893	0	1.4186	0.568137	0.551307	1.76192	0.337932	0.0103968	0.268121	1.84742	0.138512	1.255	1.08836	2.61489	5.903	0.605132	2.8379	0.254992	1.80644	0.314168	0.276763	3.15323	2.86582	2.61907	0.621898	2.11061	1.44329	0.859671	1.84246	2.80543	1.73215
ARSF	0	0	0.000803225	0.0351679	0.0141104	0.112281	0	0	0	0	0	0.00820022	0	0	0	0.0453908	0.0734565	0.00942506	0	0.00401481	0	0.00337376	0.00373649	0.159169	0	0	0	0.00457769	0.0564121	0.0277541	0.110937	0.00501809	0	0.0138836	0.00252806	0	0	0
ARSG	10.0844	7.87754	6.20285	9.06472	6.74939	2.38471	6.99861	5.60381	18.836	8.55426	26.731	4.82773	20.053	15.4161	12.3701	10.631	4.73637	13.9419	7.92196	3.19699	3.28381	12.2841	8.64354	9.84162	10.1439	12.8249	16.5367	18.6013	3.51298	4.22431	7.71123	13.1429	14.3823	16.2754	33.8132	10.8935	4.70741	7.1021
ARSH	0.0468512	0.137623	0	0.0345765	0.0699781	0.0251465	0.114553	0	0	0	0.0391922	0.225794	0.161315	0.00983214	0.0417725	0.223796	0.0906147	0	0.062495	0.0946007	0.0642187	0.0587104	0	0.069004	0.00437358	0.113665	0	0.289306	0.116516	0.166401	0.119747	0.0370909	0.137592	0	0.0591519	0	0.169725	0.196873
ARSI	0.240197	0.19918	0.599765	0.752165	0.140948	0.920166	0.176529	0.663613	1.43934	0.721178	0.404757	0	0.132075	2.21521	0.00716135	0.263013	0.475222	0.72751	0.186098	0.263281	0.153132	1.21775	0.33	0.310781	0.19359	0.250892	0.0959466	0.00858673	0.152612	0.539334	0.587174	0.174203	0.629246	0.884059	1.17171	0.123019	1.73277	0.568351
ARSJ	0.101917	0.644357	0.824417	0.254454	0.426573	1.46798	1.32843	0.379889	1.24587	0.485665	1.09199	2.83832	0.44783	1.39459	0.617302	0.29733	1.28834	1.85292	1.08791	0.936607	0.263868	0.81315	1.71952	0.467005	0.227558	0.140366	0.147579	0.423686	0.174458	1.52097	0.637058	0.112022	0.773077	0.213256	0.293362	0.00685853	1.01386	0.571202
ARSK	0.43475	1.38584	1.06558	1.12639	1.77467	1.00581	0.650373	0.520835	0.502047	1.12903	0.572832	0.706245	0.904362	0.495134	0.067656	0.950341	1.22155	1.41406	1.59419	0.958228	1.11215	1.05757	1.02585	1.75028	1.02122	1.04176	0.672001	0.888655	2.38976	2.88169	1.14182	0.700042	0.899255	0.46001	0.90878	1.35093	0.734025	1.36452
ART1	0	0.197285	0	0.01527	0	0	0	0	0	0	0.129788	0.170994	0	0.0129411	0	0.0296073	0.0514502	0	0.234404	0	0.0311613	0	0	0	0.0116947	0	0.0133132	0	0.0186738	0.138152	0.0226668	0	0.0573597	0.0319491	0.070292	0	0.101963	0.067964
ART3	0.0521134	0.139927	0	0	0	1.11527	0	0	0	0.0402654	0.0652339	0	0.0238385	0	0	0.0496347	0.0143518	0.29532	0.262556	0.0554015	0.0129885	0.0373791	0.0466015	0.0822423	0.0389423	0.0395041	0.00554936	0.0220844	0	1.00392	0.183514	0.0274042	0.031718	0	0.0131081	0.0109823	0.0769799	0.113941
ART4	0.0693218	0.780033	0	0	16.6647	0	0.172628	0	0.605262	0.0761164	0.19762	0.135593	6.11676	0.887822	0	0.338194	0.456971	0.189141	0.446197	0.385466	0.0962378	0.0427148	0	2.65624	0.0666531	0.0270217	0.0189818	0	0.544089	0.269727	0.194127	0.108831	0.0455193	0.456375	0.349555	0	0.0388305	0.215635
ART5	0.0551954	0.288762	0.0582902	0	0.0800124	0	0	0	0	0.0675386	0	0.136025	0.0979232	0.573845	0	0.0127408	0.253882	0	0.0874629	0.0493272	0.10717	0.19683	0.291004	0.0835957	0.0300144	0.0100388	0.00704797	0.00801544	0.0263773	0.0328208	0.047937	0	0.121203	0.151777	0.148536	0	0.0323261	0.25146
ARTN	0.0473841	0.0107301	0.358995	0.183294	0.0151529	0.164119	0.0858155	0.154661	0	0.102093	0.0274982	0.0560789	0.116574	0.1842	0.0260802	0.0209408	0.0556684	0.11944	0.146183	0.00431434	0.0455485	0.00391319	0.0562597	0.0128152	0.00757409	0.203239	0.0840064	0.0953899	0.0696491	0.035699	0.0495716	0.177584	0.0684339	0.536652	0.0276864	0.284406	0.0505437	0.0240275
ARV1	7.00027	3.60993	4.858	5.6717	17.7821	5.0143	5.18658	2.21121	9.03646	7.29425	9.50241	13.6519	4.03381	2.74759	5.75707	12.5851	4.47754	6.77112	4.10846	6.86839	7.44211	5.26115	14.873	5.18883	13.5552	8.99162	13.285	18.0426	10.2396	12.5778	6.71735	4.76721	4.50967	1.65786	6.6733	3.38428	5.72323	6.92871
ARVCF	0.304898	0.973625	2.27534	0.670566	0.531872	0.989918	3.55089	3.81393	0.622907	2.00105	1.30734	2.12732	1.22924	1.38682	0.178259	1.09688	0.750633	1.35913	0.763823	1.70804	0.859707	1.60927	0.781309	0.773959	1.47088	0.707776	1.39276	0.866679	0.381692	0.477556	1.21283	1.34032	1.69957	1.73479	2.44099	4.35355	1.04136	1.37508
ARX	0.0305675	0.0129748	0	0.0781047	0	0.933277	0.996359	0.287149	0.00744068	0.00688119	0.00553462	0.0121391	0.0792078	4.41436	0.00792433	0.196276	0.146213	0.0923785	0.0294427	0	0.404944	0.0908796	0.0696475	0.0192998	0.0317241	0.0914151	0.0279936	0.0222178	0.466125	0.627123	0	0	0.0328752	2.9049	0.17853	0.0113394	0.187953	0.246916
AS3MT	0.207928	5.61172e-05	1.43349	0.5881	0.260262	0.0807742	2.56935	0.756219	6.0581e-07	7.17644e-06	7.26452	1.68847	0.319382	0.294039	1.11982e-05	4.15667	0.304586	0.0298276	3.09746	0.3587	4.39649	0.213577	4.02229	0.807531	0.0372506	0.995783	6.76546	0.404385	1.37868	0.604525	1.80997	0.0607397	0.179575	0.496962	0.341243	1.63895	0.068265	0.503943
ASAH1	200.801	68.4198	126.305	69.3862	193.204	35.5371	74.6687	47.5128	54.0542	57.9577	108.146	171.141	98.1479	50.0903	106.079	51.4167	101.166	56.097	85.386	276.95	134.727	110.786	212.921	168.127	149.578	587.549	142.808	303.912	250.28	272.221	222.968	69.6832	47.4955	130.187	72.6788	418.865	132.117	133.64
ASAH2	7.7177	2.54184	3.43902	2.39539	2.23944	1.49137	3.62008	2.23825	1.49152	6.89874	3.97051	5.66628	7.39246	2.60971	7.7275	7.71101	3.10828	4.81191	2.06546	2.59268	9.54736	2.7987	4.67007	11.0674	11.7981	6.75416	4.49853	6.70776	3.43236	4.56596	2.60611	6.43939	1.434	1.20747	7.13498	0.014229	5.18739	4.9423
ASAH2B	30.3205	7.85133	10.8387	8.78546	7.6064	6.176	8.76106	4.71306	1.18142	9.8772	13.5582	18.4091	20.6017	8.30128	26.6987	24.0862	9.61598	8.21765	6.79265	11.0757	33.9019	11.7181	19.6392	45.1926	42.9413	22.595	16.9014	24.5479	13.9023	18.8716	7.78806	19.5709	4.79548	4.75039	23.3617	0.0301488	16.6572	16.253
ASAP1	27.4916	25.7733	11.2295	18.2298	11.9529	17.8078	52.5462	12.0563	36.8651	20.7414	20.2376	25.6158	25.5942	18.6456	22.8529	19.8587	28.6445	20.2211	27.8045	23.2661	20.6736	19.4138	17.0694	21.8042	15.9542	14.5951	17.1663	11.4306	11.0244	12.441	22.1778	11.9911	16.8839	21.0076	27.5865	9.05518	17.9365	16.6284
ASAP1-IT1	0	0.0513874	0.0414657	0.0172467	0	0.0562289	0.0680536	0.0144333	0.077263	0.0540385	0.0146574	0.0643867	0.0641344	0.0291318	0	0.0334144	0.0387397	0.0859815	0.0622668	0.00754531	0	0	0.0567319	0	0.00663624	0	0.00754137	0	0	0	0.0341367	0.00920475	0.0107771	0.018008	0.0704433	0.0293649	0.0345044	0.0383572
ASAP2	14.7025	10.4793	5.91736	4.8432	7.29241	9.71081	14.8837	15.8358	9.39559	10.7389	10.0725	6.49747	13.5402	9.08936	10.3491	7.45524	8.33285	5.59366	11.3091	9.16208	9.14293	9.77356	15.5307	8.94362	11.8454	11.7222	6.10221	4.9619	9.93729	5.35623	5.58123	14.4313	8.76669	9.71895	13.5449	6.77926	4.72671	7.58829
ASAP3	13.7542	11.2286	6.99775	6.37599	6.80436	10.5525	6.84804	10.4444	10.3491	9.39956	4.88768	5.78201	8.10568	10.634	5.58815	3.44386	10.4434	4.04162	8.16949	7.05369	14.755	16.2853	12.1201	7.76986	4.65091	12.7289	17.5329	8.39436	17.0135	15.1117	9.56695	4.21357	8.74599	6.57349	10.0901	11.0431	9.26567	7.64683
ASB1	0.826531	1.30749	1.24119	0.663012	0.448083	1.20198	0.960152	1.65522	1.32261	0.673075	0.857124	0.630449	0.791446	1.37671	0.581432	0.625257	0.87877	0.741141	1.09983	0.97432	0.574644	0.840376	0.381834	0.564344	0.492636	0.614256	0.585117	0.450745	0.608851	0.797334	1.08482	1.1045	1.68068	1.8243	1.18972	1.19974	1.26592	0.906576
ASB10	0	0	0	0	0	0	0	0	0	0	0	0	0.0416962	0	0	0	0	0	0	0	0	0	0	0	0.00846893	0	0	0	0	0.084404	0	0	0	0	0	0	0	0
ASB11	0	0.148411	0.100959	0	0	0	0	0	0	0	0.0287744	0.00638996	0	0.0707665	0	0.0200026	0.0227335	0	0.0122069	0.00293029	0.00688257	0.00241306	0	0.00290473	0	0	0	0	0	0.29266	0.00672726	0.0295369	0.0170345	0.000357426	0.0246573	0	0.0414275	0.0175633
ASB12	0	0.154271	0.112153	0	0.0356623	0	0	0	0	0.649814	0.0131946	0.014487	0.0144482	0	0	0.0601943	0.034871	0.0620793	0.112138	0.0270632	0	0.148795	0	0.0869673	0.0475869	0.0289223	0.00677006	0.0230934	0.0443218	0.312317	0	0.0248933	0	0	0.0555688	0.0397929	0.0932789	0.011515
ASB13	2.79954	0.671968	1.09411	1.18282	1.22494	0.76425	0.92439	1.75035	2.12999	0.777984	1.56709	0.832553	1.77608	1.12822	1.43159	1.16675	0.655405	1.00383	0.840258	1.68884	1.12332	2.20623	2.28118	1.85507	0.565635	4.00747	2.63464	1.29338	2.85004	1.41118	0.879226	0.859003	2.0823	2.67177	2.07145	2.22172	0.77314	1.30176
ASB14	0.152988	1.17755	0.618472	0.414443	0.20207	0.57632	0.898642	0.0149648	2.80563	0.803156	1.5314	1.12197	0.607489	1.79758	1.51229	1.26569	0.757516	4.78324	2.06459	0.600499	0.244159	0.174235	0.259119	0.198076	0.0790159	0.286064	0.130588	0.050563	0.114687	0.198519	0.766481	0.201635	0.855251	0.778199	0.832687	0.0450242	0.700961	1.10066
ASB15	0	0.0138261	0	0	0	0	0	0.164697	0	0.0146604	0.011797	0.00646896	0.0259674	0.00596587	0	0	0.0155828	0.0843329	0.0251009	0.00296679	0.00696655	0	0	0	0	0	0	0.00338538	0	0.221891	0.013726	0.0298839	0.0394007	0	0.121555	0	0.0139715	0.0103184
ASB16	1.00363	0.488373	0.43209	0.365549	0.00672773	0.506651	0.880321	0.233771	2.58705	0.770818	0.780795	1.11432	0.608329	1.06975	0.0324441	0.311937	0.180254	1.01756	0.241861	0.279566	0.175259	0.0772029	0.270741	0.011382	0.087415	0.404694	0.277113	0.0960763	0.304754	0.220476	0.366093	2.92284	0.263956	0.441096	0.243099	0.857615	0.573898	0.351231
ASB17	0.122932	0.275538	0	0	0.0920088	0	0	0	0	0	0	0.034623	0.312932	0	0	0	0	0.295457	0.0715628	0	0	0.00741547	0	0	0.0307198	0	0	0	0.0489897	0	0	0	0	0	0.0303055	0	0	0
ASB18	0	0	0	0	0	0	0	0	0	0	0.0964393	0	0	0	0	0.0137549	0	0	0	0	0	0.0208207	0	0	0	0	0	0	0	0.0924111	0	0.0379465	0.0355529	0.0148523	0.0145221	0	0.0379067	0.010524
ASB2	0.171884	0.83954	0.0991061	0.208907	0.517715	0.228628	0.108865	0.300039	0.27206	0.0790882	0.0687637	0.10055	0.132457	0.573976	0	0.229745	0.363507	0	0.811249	1.39766	0.209725	0.212471	0.0701735	0.280109	0.32708	0.0494028	0.155158	0.243284	0.145663	0.858504	0.0900074	0.295661	0.250974	0.401706	0.441172	0.325746	0.565613	0.10526
ASB3	1.4794	1.03322	0.136481	0.879487	1.95406	0.967294	0.188368	0.211802	0.178994	3.71773e-06	0.811085	1.44859	0.633003	0.0537511	3.81561e-06	1.76938	1.57554	2.12614	2.79956	2.66593	2.05816	2.37755	2.76707	2.19215	1.92125	3.00731	2.24125	4.19286	2.14351	1.04608	1.72384	1.25262	2.84245	1.34386	1.95362	4.7402e-25	2.13165	1.20748
ASB4	0.00862292	0.0756238	0.0919823	0	0	0	0	0.0123074	0	0.213293	0	0.438656	0.0118397	0	0	0	0.0216785	0.00490442	0.0230748	0.0184875	0.00241323	0.0887409	0.0300748	0.0101871	0.0594598	0.0058745	0.170959	0.0188371	0.0205912	0.124617	0.00954694	0.0476278	0.0398481	0	0	0	0.02548	0.0188546
ASB5	0.00412875	0.0613863	0	0	0	0	0	0	0	0	0	0	0	0	0	0	0	0	0	0	0	0	0	0.00782061	0.00461387	0	0.00794143	0.0090032	0	0.85596	0	0.00331841	0.00388935	0	0	0	0.0124094	0
ASB6	2.36592	0.9791	1.31385	0.755087	0.576942	2.5805	2.03786	3.31822	1.38751	0.495935	1.03353	1.06674	0.876303	1.64977	0.113128	0.999318	1.00886	0.922986	0.832779	1.40745	1.07099	1.27123	1.00774	1.34397	0.99752	1.83306	1.13103	1.4126	1.00205	1.41211	0.822148	1.08019	1.3722	1.2983	1.3147	0.871751	1.22906	0.885218
ASB7	8.11954	2.66661	3.13045	2.27938	2.07229	3.57418	1.10007	4.42388	3.02176	2.64054	3.30119	4.27397	2.39582	1.63449	4.57501	3.45957	2.48604	0.779623	2.79007	3.84903	5.86365	3.09566	4.55294	4.17057	4.51709	5.50629	4.31353	4.00474	3.3707	3.58733	3.35594	6.12143	2.83777	1.66789	2.35203	0.620392	2.59299	2.47495
ASB8	6.85324	3.08466	2.44176	2.80397	5.26015	1.79574	3.24903	2.746	2.08755	1.23199	2.73009	3.11843	3.75868	3.92035	1.47964	3.05126	2.3287	1.72051	3.33737	4.30365	3.73964	4.21551	3.45452	14.1222	3.67815	4.84767	4.78587	4.8208	4.11745	4.24338	2.27857	2.5554	3.42929	3.0153	5.89783	2.73629	3.19173	2.56443
ASB9	0.215965	0.716948	0.317923	1.02757	9.31753	0.494235	0.957955	0.617065	0	0.060109	0.194439	0.104588	0.332575	0.224418	0.193448	0.602199	0.399467	0.644299	0.523651	1.21273	1.04514	0.411831	0.403355	0.350187	0.0807739	0.204387	0.123898	0.327905	1.08498	0.505116	0.31002	0.22697	0.440474	0.138098	0.111526	0.00985694	0.308615	0.241504
ASB9P1	0.0407785	1.51953	0.639232	0.829803	0.13706	1.03608	1.39757	0.324203	0.993034	2.48905	1.7073	2.14294	0.751595	1.32227	6.5911	1.1907	0.756403	2.69559	2.12994	0.312058	0.128047	0.617987	0	0.128696	0.0456908	0.393237	0.0417305	0.0888685	0.155785	0.107907	0.934148	0.425537	0.89876	0.574242	0.592253	1.15946	0.788629	0.910872
ASCC1	21.2408	13.2546	16.6421	13.5261	18.3241	17.4931	18.7982	10.8142	4.50267	14.9357	17.7088	15.573	17.045	15.6347	20.5375	16.2538	15.8332	11.0675	16.4446	17.8866	24.6372	17.4397	21.7004	35.5228	19.8769	23.5363	24.8757	19.7162	25.6972	30.3611	20.4858	16.0456	15.5893	14.1306	18.4949	7.9216	12.5775	19.1087
ASCC2	19.7078	15.696	12.8082	11.2543	14.3	20.1453	25.7254	15.7363	14.5781	15.2256	19.8922	14.4195	15.3902	21.5231	3.40342	16.5705	14.2364	19.8312	15.1907	21.0357	23.3001	21.3721	21.1411	14.3473	22.4261	16.3122	28.3412	21.0862	29.6339	13.0455	15.9594	20.0242	20.2838	18.3116	30.4041	9.87875	13.4021	12.5254
ASCC3	17.3082	23.9739	20.9039	27.0574	28.2809	13.464	17.8729	16.916	29.8692	26.3976	16.7204	18.1373	20.78	20.86	19.6271	35.8937	28.7793	24.6865	25.9435	23.1794	14.289	22.6664	17.7835	23.921	17.2175	18.7259	17.9162	28.2389	23.4634	23.9931	28.9277	14.6422	14.1081	11.9981	15.9794	6.24817	30.3225	26.5316
ASCL1	0.38308	0.00756939	0	0.0835674	0	0	0	0.238148	2.67799	0	0	0.290487	0.0284268	0	0	0.000923379	0	0	0.013743	0.00650767	0.110768	0.00545876	0.821964	0.00644949	0.00285577	0	0.0850948	0	0	0.292096	0	0.0204434	0	0.232207	0.0626088	0	0.0101965	0.0056491
ASCL2	0.0846898	0.0207826	0.0126296	0.0417564	0.0079037	0.0113963	0.238979	0.20268	0.0947516	0	0	0.0584265	0.0877268	0.00892243	0.0252655	0	0.0117249	0	0	0	0.163582	0.0416344	0	0.0579156	0.00395096	0.00642138	0.0045169	0.143574	0	0.0466451	0	0.0728571	0.0196978	0.131666	0.0160888	0.00901673	0.0349625	0.0232665
ASCL3	0.0252743	0.491327	0	0.390982	0	1.45041	0.582219	0	0.0769602	0.181863	0.211253	0.465157	0.620633	0.960138	0.952636	0.547108	0.55888	0.965208	0.319606	0.1297	0.0377407	0.0561192	0	0	0.0716041	0.183525	0.0159999	0	0	0	0.228801	0.933928	0	0.51063	0.321362	0	0.140554	0.104817
ASCL4	0	0	0	0	0	0	0.0251625	0.213387	0	0	0	0	0	0	0	0	0	0	0	0	0	0.00908157	0	0	0	0	0	0	0	0	0	0	0	0	0	0	0	0
ASF1A	2.64879	3.10938	3.16557	3.30865	5.80953	3.33122	2.63725	3.20487	3.27742	2.15196	2.67266	5.53314	2.89829	3.83752	4.31448	5.98123	3.0997	1.68211	3.25118	3.31032	5.14852	2.83866	3.53761	4.06908	7.11063	6.54653	4.52186	6.34829	4.51414	5.18835	4.51597	2.52552	2.9976	1.74772	2.9206	2.44447	3.23989	4.3112
ASF1B	1.62561	0.100483	0.759543	1.50335	2.17827	1.73892	0.858951	1.37186	0	0.176964	0.467344	0.376773	0.544461	0.0574551	0.094922	1.16561	0.365422	0.261568	0.121674	0.256696	1.94239	0.191667	1.53158	0.843918	2.95237	1.66559	2.35233	1.52316	0.330961	1.01017	0.638311	0.68015	1.08588	0.435969	0.604748	1.59624	0.593377	0.908285
ASGR1	0.0891481	0.256867	0	0.200962	0.175011	0.585912	0.312115	0.277313	0.399615	0.13537	0.134213	0.269137	0.12222	0.463021	0	0.278433	0.427104	0.143763	0.175618	0.551356	0.256533	0.278058	0.181142	0.196854	0.230352	0.0486359	0.181211	0.107003	0.287792	0.17696	0.120741	0.276493	0.255001	0.542949	0.088266	0.553295	0.2113	0.175194
ASGR2	0.149616	0.737271	0	0.0549562	0.27208	0.146696	0.133192	0.946309	0	0.0176249	0.0977661	0	0.250981	0.028512	0	0.245155	1.11624	0	0.182314	0.631421	0.0938971	0.11851	0.150715	0.146152	0.259919	0.11909	0.182993	0.0747092	0.489131	0.102164	0.225159	0.0810547	0.284325	0.398937	0.137849	0	0.156622	0.0750431
ASH1L	24.938	29.9855	23.6457	29.9872	16.8955	23.8202	19.2818	20.7796	41.7395	32.6862	46.266	60.2865	35.571	28.3917	59.1546	50.4995	28.597	56.7247	47.3098	32.433	32.7218	29.6094	29.6504	19.2444	16.686	31.5388	34.0141	21.2324	50.5593	24.1575	41.7284	20.5034	39.0849	21.651	41.4102	18.2248	36.2418	45.847
ASH2L	32.0241	16.6922	8.13244	9.59891	20.4467	21.5844	23.8007	4.92709	11.6498	10.9315	17.6022	20.3372	13.84	11.9557	21.0662	70.7912	13.0393	13.233	18.7215	18.2813	30.0288	19.7545	24.1366	25.8992	27.5458	21.6049	28.1006	15.4865	22.3852	23.3075	23.1735	30.2149	13.4221	13.7895	22.2958	16.5122	16.437	16.0296
ASIP	0.176746	0.0807479	0	0.327639	0	0.175326	0.235189	0.53259	0.570815	0.91657	0.451872	0	0.037516	0.0332284	0	0.0393252	0.368033	0.0788075	0.110383	0.0756852	0.109921	0.049446	0	0.0185609	0.117162	0	0.0775072	0.0213303	0.0176821	0.022045	0.365155	0.32143	0.0250321	0.418211	0.204774	0	0.080697	0.241185
ASL	29.5704	9.60473	10.9674	12.8725	59.156	19.1881	16.4037	25.7572	5.9094	19.8268	15.7248	18.0605	25.8078	27.05	3.88447	10.1356	12.0963	18.1746	12.6807	21.8987	42.9526	34.6354	29.3632	21.0098	23.0404	17.4378	28.767	48.5971	32.1818	49.2131	17.4201	19.1062	25.6881	22.3865	22.2258	39.6958	17.7745	14.1612
ASMT	0.15274	1.16263	0.0871393	6.61563e-225	0.0228974	0	0.277221	0.00632593	1.14461	0.125535	1.24009	0.743614	0.998482	3.0321	0	0.0772841	0.451451	1.45996	1.12721	0.877607	0.736783	0.158397	0.00304895	0.307999	0.0624684	0.239749	0.0265513	0.0907039	0.0437169	0.113042	0.637585	1.34454	0.841247	0.690472	2.37102	0	1.36269	0.194011
ASMTL	11.9047	15.1154	15.3094	12.3742	18.4707	17.3557	6.38113	31.0711	27.1796	13.5611	16.8533	12.9081	22.2879	15.1139	14.9731	12.1607	12.8051	12.6889	14.8183	19.0767	27.6825	22.0647	20.2445	18.3482	12.1094	30.5944	21.081	18.7055	24.3658	19.9945	12.2946	9.28883	17.5939	15.9445	11.4695	12.0655	16.7217	14.3158
ASMTL-AS1	0.416922	0.741921	0.310985	0.963337	0.304233	0.429659	0.472349	0.45754	0.568021	0.106554	0.97946	0.933889	0.906106	0.415424	0.092635	0.378976	0.479084	0.428656	0.998173	0.570155	0.136511	0.367264	0.147968	0.0462165	0.252429	0.19002	0.0327962	0.122989	0.0611718	0.0343912	0.503093	1.01482	0.821136	0.413432	0.434413	1.48454	0.347289	0.571758
ASNA1	27.8031	9.9085	10.87	22.2825	37.8919	9.53224	13.7369	22.0945	8.81918	9.38106	17.1503	17.7462	16.9949	10.2261	6.23943	12.7703	13.4213	4.45718	11.2575	20.108	28.648	29.4592	39.8783	25.4521	54.8408	40.1325	53.5871	71.901	39.6022	44.7463	19.7202	11.5391	15.9983	11.2892	19.783	15.5714	14.9585	14.4772
ASNS	5.49445	15.4091	6.99265	7.22842	10.339	24.2173	5.97412	7.25595	11.3982	23.6726	7.14855	11.5575	14.6785	10.763	6.45465	13.2342	6.78017	15.2246	9.08663	5.15444	6.44193	5.42333	7.7322	9.49785	7.72577	5.26719	14.4618	5.37796	5.32139	6.44932	9.93684	5.40315	7.73842	6.00852	11.7019	4.41742	9.65665	8.73016
ASNSD1	5.67101	7.70305	5.97732	4.17123	6.53036	8.63151	7.94511	5.55958	6.70143	7.33235	9.68537	6.59755	9.90482	5.10534	11.3555	7.62888	6.43558	5.51242	9.26625	4.61405	3.04615	4.55404	13.3182	7.37477	7.82927	6.46544	6.91201	8.37732	5.07983	6.90976	6.95006	8.26949	6.01304	3.37768	10.868	3.45869	4.63451	7.79391
ASPA	0.956938	6.80273	0.759217	1.10801	1.28747	0.884484	0.629166	0.793749	5.16992	2.08884	0.841795	0.841103	1.6368	1.64109	0	2.3781	5.17016	0.739318	5.89655	6.45794	0.549678	0.949446	3.28227	2.82484	1.28818	0.219911	0.180184	0.359112	0.19908	0.644894	1.91894	0.410883	2.13773	0.859349	1.33059	0.0126407	1.25323	0.844803
ASPDH	0.0177204	0.311133	0.0607074	0.0763309	0	0	0.603791	0	0.19643	0.526617	0.0648444	0.213865	0.211775	0.397629	0.150602	0.288655	0.0285744	0.350761	0.112481	0	0	0.0401109	0	0.0335315	0.0199813	0	0	0	0.0212086	0	0.0251869	0	0.110429	0.765594	0.0646373	0.0212912	0.013219	0.0335223
ASPG	0	0.290744	0.0471365	0.0194675	0	0.0956818	0.281224	0.148035	0.0331759	0.297338	0.256544	0	0.0818366	0.174929	0	0.0378272	0.163991	0.0294556	0.176001	0.0502617	0.113015	0.11972	0.00390001	0.0829694	0.0110333	0.00597964	0.0126214	0.00954987	0.00784214	0.014472	0.182989	0.230072	0.0612646	0.0665458	0.0600457	0	0.0587073	0.0289324
ASPH	9.63998	48.8004	56.7397	20.6911	11.3067	118.347	39.5126	30.7114	40.8136	44.4412	79.7673	57.777	23.2728	52.9348	70.3339	55.9449	55.2779	85.3185	68.0992	102.204	79.1746	67.8197	119.68	128.38	49.6091	134.545	123.603	67.5914	92.2423	85.0137	102.667	16.147	64.0145	41.1424	38.0972	30.7213	79.8115	36.1513
ASPHD1	0.0999161	0.345409	0.0805894	0.0801536	1.16053	0.916998	1.81464	0.0112351	0	3.39135	1.97587	2.71722	0.473114	9.11031	0.0666747	0.324014	0.120032	0.308197	0.132747	0.139064	0.258038	0.616118	0.991742	0.120391	0.0152755	0.123937	0.406444	0.362861	0.103042	0.173727	0.548601	0.157384	0.779236	0.77707	4.39429	0	0.169695	0.208229
ASPHD2	0.206461	0.055882	0.217986	0.179357	0.285513	0.135051	0.0842188	0.00887962	0.243909	0.16609	0.190652	0.0574898	0.110248	0.309238	0.0205005	0.136355	0.12591	0.0569022	0.106509	0.10278	0.157215	0.126056	0.114052	0.10903	0.15727	0.0717556	0.204621	0.0900471	0.239484	0.192435	0.15249	0.15411	0.070837	0.142056	0.199564	0.0146758	0.203377	0.136059
ASPM	12.1592	0.815948	6.59591	10.8646	8.20949	13.2485	33.0695	12.2292	4.0018	4.58955	4.62975	1.72285	7.41786	2.55865	20.8654	28.2645	3.54195	23.1074	1.4946	2.21555	6.65656	0.508555	7.90312	4.55921	14.7919	1.37595	11.3283	1.92427	0.913823	3.16637	11.0292	10.709	8.07082	1.92868	4.88541	2.14368	5.0728	15.2177
ASPN	7.7489	58.1487	70.4046	38.3504	8.71067	9.80405	19.8839	29.9591	56.4685	48.502	23.6567	9.49299	11.7306	40.5416	86.9827	43.2526	45.3103	45.377	18.2606	8.73079	31.1699	227.956	55.7791	99.7459	32.7133	32.8287	10.812	3.23982	9.09933	225.416	100.113	5.99948	111.148	43.2312	29.4567	3.83066	72.0731	99.1559
ASPRV1	0.017712	0.567208	0.509608	0.175231	0.0594815	0.172362	0.1748	0.140827	0.468716	0.323371	0.12664	0.171608	0.122848	0.458162	0.265752	0.246949	0.255861	0.0619585	0.126764	0.376213	0.0353182	0.341231	0.0384879	0.0409997	0.079265	0.134316	0.139908	0.115838	0.0352214	0.0346522	1.06193	0	0.215269	0.382796	0.112701	0.919004	0.217384	0.130253
ASPSCR1	13.3008	3.38821	6.10284	7.46769	4.33551	10.0426	12.5777	15.8367	5.7117	6.08855	4.18345	4.55802	12.1826	5.19303	2.21075	4.8301	4.12906	7.43921	4.23879	5.47552	6.35629	6.17714	7.47064	5.09797	14.2899	5.26754	7.38665	7.71571	4.65628	6.25793	5.07216	12.2902	7.53412	9.81061	13.3376	18.7258	7.08892	4.09618
ASRGL1	1.75973	1.23299	2.73665	0.398648	0.865224	0.822604	0.363456	2.71235	2.06521	0.426851	2.05995	0.160342	0.211818	1.20115	1.29689	8.93242	0.849658	0.875354	0.702352	1.98327	0.411169	5.89623	1.07655	0.95498	3.3783	0.064407	5.68343	0.195838	1.46499	2.30036	1.75662	0.377887	1.63731	0.903345	1.01206	1.86101	0.352753	0.366876
ASS1	139.247	79.9714	61.0471	15.9616	607.363	259.343	15.2179	121.735	32.7555	43.0595	29.8995	9.23356	27.2951	49.7574	21.5947	36.1839	64.7145	22.1618	126.843	150.967	39.792	70.0579	163.318	203.637	20.6503	51.4016	9.12741	79.4917	51.2469	73.7544	98.5959	60.9497	84.3051	61.9147	52.2938	20.2656	19.5225	67.1476
ASTE1	2.66896	3.01756	2.81847	1.95517	2.93334	2.75713	1.72189	2.24407	3.72394	2.61762	4.06925	4.3773	3.07798	1.89357	6.4826	3.45294	2.36253	2.5238	4.82709	2.88672	4.61931	3.63014	3.63492	2.44832	2.30804	5.12143	4.07741	4.41712	2.73677	2.88739	3.56848	2.20052	3.9463	2.08413	4.88502	1.9836	3.83337	3.13786
ASTL	0.232583	0.0153869	0	0.0309669	0	0	0	0	0.295783	0.064814	0.0263201	0.014449	0	0.0655854	0.241708	0	0.208678	0	0.069903	0.148444	0.466247	0.233991	0.423944	0.233511	0.0949148	0.317287	0.00675188	0.230311	0.0126291	0.0155733	0.0459677	0.0413815	0.0193833	0.210529	0.0395894	0	0.0930368	0.0459397
ASTN1	0.066642	0.596405	0.242469	0.028477	0.102913	0.37952	0.0761568	0.367262	0.658758	0.0854742	0.0371464	0.070805	0.288964	0.340119	0	0.134449	0.511745	0.328092	0.26629	0.309244	0.0830706	1.08633	0.020569	0.547283	0.0212529	0.00577766	0.032573	0.0115469	0.0548326	0.236935	0.0778111	0.0793259	0.402213	0.243534	0.38236	0.00830028	0.357361	0.290816
ASTN2	11.5546	12.4013	3.4082	4.86401	14.903	2.35628	6.37228	6.56081	8.15131	9.68028	18.4879	28.9926	11.7394	5.05928	3.82178	2.74854	5.88093	3.61528	3.55458	5.84734	3.95599	10.0392	4.3079	3.08481	1.43109	4.38132	7.22347	12.2838	31.6793	10.9968	5.90865	2.84723	4.91907	5.34457	11.0115	26.2864	5.38769	7.35473
ASUN	10.6904	7.81698	13.5903	5.45809	11.9783	23.3926	14.7743	6.1868	14.2213	13.9921	9.1492	11.016	7.70051	6.85504	25.0011	12.5669	10.9152	16.4916	14.0826	9.71251	13.3625	6.57386	11.0296	11.4835	11.8613	14.6626	15.1291	11.1924	13.3039	13.3554	14.7133	16.0465	12.6305	10.1266	19.5706	5.09043	7.00752	13.847
ASXL1	21.9011	38.216	21.1779	26.6106	18.8014	46.4189	35.5224	25.8092	47.5207	54.5475	33.3587	22.6153	28.422	36.8064	30.7772	29.1822	33.7793	50.7858	49.0173	25.3083	27.9882	25.1996	24.377	29.1218	33.7371	23.2273	25.2247	14.2797	15.9989	29.1186	35.184	37.8374	37.0445	37.5507	39.5445	19.9721	28.2212	32.1534
ASXL2	8.82796	8.62524	5.93914	6.62944	5.55193	6.20042	9.79166	7.84971	9.38647	10.8722	9.52214	10.6408	10.311	7.71441	21.8264	11.7088	9.89148	9.89729	11.1408	10.1308	9.97114	9.33223	9.76542	9.32417	10.5159	12.9569	15.3204	10.1155	9.56439	7.69206	9.15892	9.0517	7.01281	6.4726	10.3717	7.76206	7.96487	9.58103
ASXL3	0.0173193	0.984578	0.288394	0.0946245	0.0404718	0.0259653	0.0809179	0.0423728	0.463444	0.346776	0.0764562	0.897546	0.117683	0.303572	0.611624	0.110636	0.284316	1.10795	0.404866	0.283507	0.16488	0.132902	0.145169	0.0914768	0.30827	0.00573429	0.0353862	0.0350823	0.0478497	0.0656043	0.365062	0.0396484	0.205442	0.0526285	0.0624415	0.00415858	0.0955776	0.112765
ASZ1	0	0	0	0	0	0	0.00256378	0	0	0	0.00879201	0	0	0	0	0	0	0	0	0	0	0	0	0.017626	0.140261	0	0.0268442	0	0	0.0102662	0	0	0	0	0.169805	0	0	0
ATAD1	16.6962	8.11348	5.69031	7.40151	10.7335	8.72935	7.33511	4.51355	5.4221	7.8608	11.6887	9.27515	10.2573	8.40224	10.3119	13.1699	10.0051	6.59738	11.3411	9.33862	12.713	8.67361	13.7353	9.7443	12.5861	16.3056	13.4993	14.4278	11.5926	14.5906	8.48122	8.12851	7.39255	6.1024	6.48072	2.29907	5.73565	7.79742
ATAD2	44.5899	6.14891	13.9172	13.2067	11.5585	31.7824	90.9881	76.3122	18.0172	11.697	23.4233	10.6388	18.6268	16.7295	33.2132	18.7218	8.40262	22.9605	10.4777	5.33841	20.0898	3.97335	12.8198	15.6456	46.7707	16.2351	16.9811	8.32889	19.7838	6.74495	20.1802	50.8364	26.7314	45.0899	30.1598	69.7212	16.1203	35.8699
ATAD2B	3.81134	7.65634	5.35119	4.1769	4.01696	4.86183	6.8209	7.14332	9.93721	10.2146	8.91964	5.09782	7.71384	9.39634	9.78123	9.01423	8.88792	9.17909	10.6913	5.65244	5.39096	4.9082	4.42049	4.41477	7.36928	4.43661	4.82463	2.99052	4.34515	2.44697	6.66025	5.23361	5.65931	4.54874	6.97682	4.72196	6.6394	5.63883
ATAD3A	24.391	4.44207	6.6798	5.96129	6.0114	20.8819	15.5805	23.0387	4.93718	6.12468	5.05987	4.59523	9.07902	7.33196	4.92808	4.05231	5.82159	5.92131	7.89432	8.42951	12.937	7.63164	8.80277	8.61091	10.2829	9.64297	17.0495	6.74961	5.83694	8.06548	7.70479	7.20008	9.78716	12.1214	8.09269	15.3212	7.94829	5.59807
ATAD3B	7.48301	5.87051	4.66309	3.60836	2.64139	9.73686	12.4023	14.4305	3.29498	6.74687	4.37078	3.23949	5.03763	7.73972	2.1172	3.73815	4.36927	8.14189	8.25596	4.28899	4.35826	5.43232	3.43078	2.75127	3.28877	2.92882	3.29888	1.60836	1.69338	1.97605	5.24125	6.55117	10.2647	10.5713	6.15386	14.4808	5.30037	2.90987
ATAD3C	1.84097	0.515737	0.460225	0.536065	0.496773	3.57487	1.40008	4.19814	2.9608	0.914287	0.44408	0.831705	2.30795	0.662648	0.174065	4.44166	0.789958	1.19352	1.43108	1.19301	1.28099	0.808463	1.21108	0.983949	1.3026	1.0269	1.26496	0.566697	1.00771	1.15936	2.33435	0.745915	2.31711	0.828828	1.48543	0.924525	2.94533	1.86454
ATAD5	2.01984	2.33136	1.99586	2.67373	1.18301	2.07814	5.10979	4.02725	3.30906	3.62908	2.41379	1.75215	2.29856	2.41688	4.38838	2.17095	1.75815	6.0332	2.64742	1.06699	2.01827	0.647725	1.38533	1.02826	1.57641	1.4366	0.910951	0.804794	0.501364	0.537916	2.37732	2.11465	2.39815	1.26149	3.71441	0.582363	1.88597	2.16443
ATAT1	2.40546	3.81377	5.0165	5.47942	1.18962	4.0894	2.61602	6.58994	1.63094	2.16659	7.95331	7.50329	6.33069	7.5758	4.08144	7.52375	5.15175	4.91019	4.54797	3.82296	6.17675	4.95454	2.32007	3.84873	6.01832	6.05631	3.0838	4.05379	2.52026	2.1213	6.98606	6.677	5.9138	3.55018	9.8966	4.54789	6.09881	4.02819
ATCAY	0.00242039	0.0102547	0.00441734	0.00544162	0	0.240699	0.0163961	0.00926778	0.00834077	0.01924	0.00583999	0.0084555	0.0153105	0.0235383	0.0133096	0.017959	0.010187	0.0381753	0.00492622	0.00141209	0	0.0147999	0	0	0.0283683	0	0.00170878	0	0	0.012394	0.0105742	0.0118245	0.0155037	0.0383846	0.00562617	0.097358	0.0227202	0.0255507
ATE1	6.95646	12.9274	7.12895	8.36272	16.5999	8.35937	12.8724	5.34156	8.40361	10.5369	14.0743	11.1855	12.1044	12.8353	22.1157	14.0634	11.7145	5.59581	13.3932	13.2239	11.0934	11.7591	14.9262	11.3877	10.1169	15.8112	16.1131	13.8817	8.12327	12.175	9.84636	13.7358	12.2804	9.37673	18.068	8.0956	7.47395	9.72007
ATF1	10.165	4.22364	2.18308	4.38202	8.7879	4.1343	5.19089	7.32373	3.65092	3.81641	4.91039	7.85036	5.72292	3.62241	10.4703	4.57582	5.6407	3.81808	7.36193	5.09444	5.53747	6.25536	6.42272	7.20919	5.30311	8.47128	7.1522	8.685	5.5869	8.86134	6.87198	7.08241	4.58282	3.55146	6.74449	1.36774	4.39103	5.82277
ATF2	10.051	21.846	11.6777	9.6148	12.3644	15.8598	14.9069	5.6122	19.2207	17.8101	16.948	19.8189	17.1966	11.8751	33.7946	18.0496	20.7549	22.1987	33.0118	16.3034	13.7653	15.2192	13.1159	17.4106	10.5221	20.4849	22.7499	31.1388	18.1403	16.082	20.7991	15.3641	15.8248	10.4183	29.4294	5.51478	12.7471	19.2674
ATF3	17.6134	17.5483	7.61925	5.80214	4.48972	14.1997	15.9385	10.9712	11.8168	4.50671	3.2101	1.10402	3.34363	19.5255	4.99271	5.94219	13.4993	13.8416	19.4116	15.6051	4.12737	60.3003	38.7376	26.1642	6.70183	1.06007	1.48919	0.511354	9.49108	4.00074	9.47848	5.7374	64.9771	21.1692	7.20998	10.1412	14.8233	8.00946
ATF4	66.6012	109.562	78.5964	62.8736	52.253	180.159	168.339	81.8813	117.225	95.4235	217.228	143.594	88.9219	164.052	175.766	124.558	111.279	85.6663	129.764	74.0249	150.292	64.3588	135.426	53.5013	124.8	49.8023	100.006	66.0257	82.1905	87.1004	116.545	111.942	140.412	163.419	133.774	115.446	85.6376	103.686
ATF5	2.23028	1.61883	6.14741	5.24692	3.66866	8.22463	2.91951	7.37589	3.08808	8.33078	2.23812	3.03244	5.09252	4.2405	1.8029	3.64388	3.40403	2.09794	1.57842	2.18744	3.708	1.60458	2.05785	2.73726	2.83521	3.61697	2.66506	4.011	1.02585	2.13961	3.31298	6.66172	3.76328	8.60676	3.09354	11.4941	5.28259	3.31099
ATF6	15.9899	11.3679	10.2259	14.055	15.9411	8.59826	7.91538	6.48989	14.4996	11.8917	22.6446	20.0618	15.2955	11.4887	11.5922	17.374	12.6989	13.0332	14.3922	12.2346	11.606	14.5354	18.5772	12.9004	12.4618	15.4592	18.8721	18.2768	23.8427	22.1963	13.7733	8.87138	10.8275	6.85522	10.1225	7.4374	9.46253	13.6472
ATF6B	31.5994	17.0812	19.7984	23.5506	16.4255	21.0395	13.4433	27.6873	12.4118	17.3049	26.4527	27.0546	29.2231	20.882	24.9662	21.9178	18.3363	12.9187	17.9852	25.7327	42.7761	35.8414	16.9094	23.6046	22.7893	31.2031	40.7614	26.9802	28.6109	27.0822	23.7325	27.2514	23.4115	30.0766	31.3698	26.8554	28.7526	22.668
ATF7	17.336	14.1617	10.9026	11.3235	13.6883	9.16034	13.3253	4.83382	20.9456	12.4379	14.8304	26.4001	13.1625	13.3872	20.1538	15.2308	12.6339	21.8444	19.9697	15.366	15.2292	17.3559	20.1282	13.0042	10.8215	14.3597	15.1824	16.0722	17.957	18.1836	12.8101	10.6555	14.8086	9.61919	17.0098	7.3354	14.9961	12.8491
ATF7IP	31.16	39.9731	30.6969	18.4055	25.9821	41.8665	29.9899	26.8124	43.1004	38.3032	34.7012	39.0717	33.6619	49.4724	62.1824	66.3973	43.3251	43.0689	53.2183	35.9091	42.5709	25.5732	28.8063	45.9732	42.5828	40.9287	32.4515	51.2365	52.0272	36.3167	38.0457	41.727	34.2103	27.5946	47.3663	24.0051	31.035	50.4696
ATF7IP2	2.5718	3.48738	1.92993	2.98712	2.04694	1.83354	5.50772	2.96356	6.15792	4.95716	3.18241	6.43425	7.31849	3.85166	3.50995	3.51648	3.70455	4.13933	3.94833	1.55884	1.29445	1.54369	1.58721	1.96343	1.00079	0.396	0.266156	1.40937	2.61301	1.6927	2.88671	3.64838	2.65077	1.61196	1.31113	0.556359	1.36154	2.1599
ATG10	3.31693	5.0138	2.94102	2.15934	4.25384	2.29742	2.46348	1.16376	1.15087	1.08328	1.95518	3.55358	2.81365	1.39177	3.04691	4.27118	3.4859	0.572067	3.65345	3.81716	3.14982	5.58872	3.11194	3.169	6.21232	2.2828	3.25822	5.41758	4.93637	3.24612	3.20825	2.16457	1.49971	1.91917	1.99978	0.20581	1.55659	2.65659
ATG12	1.95282	2.29838	1.84927	2.21125	3.09	1.5455	1.02441	0.678537	0.360409	1.71614	1.50963	1.99459	2.13004	0.81498	0.803278	1.58611	1.58689	1.24039	1.61841	2.11184	2.0461	1.98384	2.28468	2.00079	1.81887	2.22535	1.45989	2.16168	1.86796	1.60889	1.58034	2.27036	1.3023	1.70794	2.03299	0.154142	1.41941	1.62165
ATG13	9.59407	7.21234	6.85809	5.18221	3.44143	9.8716	7.37432	6.97514	7.12667	9.72021	8.38708	6.3575	7.93838	7.93507	9.28851	7.73466	6.12576	3.69473	6.93666	6.29362	5.96649	8.18982	7.82393	7.19484	7.02911	7.87259	9.99685	5.93185	6.53037	7.34844	7.099	8.82448	6.23385	7.52697	10.2116	4.76792	5.06286	6.56729
ATG14	1.22875	3.18008	1.34368	1.5244	1.58689	1.69269	2.17576	4.2579	2.43899	2.89952	2.56364	2.34678	2.6418	5.36977	2.68451	2.09433	2.78037	2.51961	3.29441	2.50857	3.09718	2.40997	1.11604	1.89588	1.7181	3.78102	2.64691	3.07147	1.77496	2.93081	2.11759	1.62458	2.42658	1.48092	3.18097	1.89625	4.60927	2.21896
ATG16L1	21.499	9.47204	11.2226	7.95887	13.3313	7.05022	13.161	11.4383	13.6397	10.8556	16.8706	25.8082	13.378	9.64382	9.28729	11.1778	9.17968	7.21636	10.8627	8.5948	11.5735	9.39466	10.2922	9.135	13.1176	19.2871	12.2605	16.2955	18.5351	14.4562	10.7806	18.7271	12.3403	7.33251	19.9414	12.1604	18.1129	9.4335
ATG16L2	10.7845	8.79974	10.9531	7.72454	2.92429	6.61533	15.6479	19.5783	24.0036	21.2937	7.00602	9.82458	14.8553	22.6762	4.25913	4.64774	9.16528	7.94571	6.165	8.7545	3.40934	8.94705	8.00116	2.58715	5.41313	3.36395	3.69508	1.55864	2.24112	2.01334	9.80857	14.9499	15.5801	18.9948	10.7948	41.4292	5.54896	9.2896
ATG2A	7.3021	6.33252	6.12908	5.1931	2.85458	7.56284	8.29854	13.3311	9.36188	7.13052	6.63721	7.6496	8.242	10.415	4.63815	4.9997	5.22418	5.50888	5.60634	6.35265	4.04335	5.51014	4.46572	4.91325	5.11847	6.4108	10.8069	2.62265	3.9904	3.53226	5.11659	7.23737	8.17487	13.7116	7.47052	13.3016	7.91835	5.54222
ATG2B	2.90235	8.8522	5.71462	5.49027	7.26746	3.45187	6.81186	8.76687	6.98627	9.76913	9.81589	4.97299	6.21905	7.89651	8.32978	6.80148	8.43591	7.34168	9.19361	6.51905	5.81064	7.19315	4.10716	5.55323	2.96633	8.79815	7.35553	4.80281	7.79523	6.44399	5.95701	4.05875	5.65449	4.35689	5.63501	3.50267	5.29966	5.77597
ATG3	44.3159	35.5347	24.813	33.8492	63.2905	53.8989	35.0722	35.2969	30.0681	44.4915	44.6794	46.9599	40.6343	23.3857	106.459	48.7777	43.7657	55.6281	58.2712	41.9802	79.813	38.8246	102.702	73.8516	95.4042	77.4383	85.3135	113.807	53.8823	64.7946	54.3563	44.9037	35.8488	28.1678	47.0702	16.4003	40.3449	53.2163
ATG4A	5.46053	3.85288	4.56207	4.76089	6.8464	3.73279	3.26635	0.853267	1.24185	4.20224	3.96441	7.46664	4.52343	2.33568	5.86224	4.6999	3.48414	3.69532	2.76881	3.64041	4.34283	4.08522	7.3585	5.13377	4.33072	4.74105	5.1746	8.27018	3.6435	5.08333	3.87935	3.26179	3.12494	2.785	2.62216	7.41855	3.61696	3.29603
ATG4B	12.2506	6.71398	6.58828	5.44186	5.43137	6.81347	7.76673	13.9535	6.48122	7.64984	8.73144	7.47873	6.90181	7.82709	2.99212	7.16057	6.0453	5.74328	6.28397	7.54161	6.9071	8.0035	5.30529	6.89821	7.76391	8.58676	6.74982	10.0359	6.83513	6.66975	7.40363	13.9258	8.97513	12.583	15.3883	6.93781	7.82038	5.28674
ATG4C	3.47987	6.04592	3.54415	3.66386	5.18261	3.37916	4.5969	5.14788	7.78327	4.30093	2.92444	4.23518	2.94275	2.77047	13.9529	3.90606	5.42599	4.13111	4.14673	5.31435	2.02817	3.96696	6.01944	3.76125	4.93588	3.14897	2.64932	4.89276	2.13954	3.63305	4.57506	5.11381	3.45503	2.01713	4.38688	2.90723	1.91317	4.2461
ATG4D	3.40433	1.35505	1.89306	1.60494	2.39033	1.34205	2.64992	4.30608	2.12171	3.22976	2.21944	2.5583	2.80801	2.15421	1.15598	1.73663	1.33485	1.26114	1.52431	2.28813	1.54471	2.31448	2.49847	2.16635	4.65063	3.3099	6.30878	4.88215	2.93245	2.44419	2.79913	3.60012	2.65856	3.97887	6.11009	11.7552	2.24985	2.48303
ATG5	3.53911	4.18166	3.99017	4.49803	6.19564	6.11197	4.09758	7.22151	3.94273	4.30492	2.96742	3.96476	3.41853	4.51384	2.35381	5.67599	4.92995	5.14138	4.72341	5.58018	3.11761	5.58038	5.53104	7.6679	5.1293	6.1529	4.16484	6.7356	5.90945	6.70493	5.09061	3.74369	3.41046	3.86312	3.92614	1.55992	10.907	6.348
ATG7	6.46131	5.74104	6.14779	4.72695	7.29563	4.77151	5.703	5.75823	8.39857	4.20843	5.06701	4.57335	5.41346	8.01622	4.70064	5.00494	7.20943	6.04402	5.63266	9.72758	3.00102	5.47566	6.95809	3.68891	4.62921	4.3276	4.85113	7.25173	4.42091	4.93345	4.99286	7.38856	5.40172	6.36972	6.28333	6.1693	4.90241	3.69435
ATG9A	6.30966	4.79481	4.70263	3.47979	3.52532	6.09721	5.31037	4.81091	6.29537	4.09566	4.60579	4.75525	6.20518	6.06657	3.91372	5.82704	5.44752	3.59697	4.93716	6.12796	3.34428	6.47423	4.24633	7.02157	7.94861	7.96534	7.0519	6.8671	4.65335	5.88125	4.64368	3.97919	5.38957	4.77944	7.29707	3.48838	5.86932	4.51763
ATG9B	0.211244	0.0918874	0.336365	0.0881083	0.00298968	0.605962	0.619139	1.10445	0.15182	0.360931	0.102179	0.112019	0.315432	0.266605	0.0195797	0.0779933	0.175439	1.04755	0.217518	0.268918	0.131998	0.113796	0.111752	0.0759836	0.125383	0.102242	0.482175	0.0797063	0.063755	0.113476	0.243662	0.391355	0.144479	1.026	0.366329	0.375317	0.261313	0.137144
ATHL1	4.44467	9.61985	42.6249	4.09665	1.01817	6.38888	24.7336	5.0367	90.833	9.29607	104.809	29.4915	3.53076	43.1647	45.6651	35.916	5.32626	45.6836	4.95977	2.66769	2.66324	4.50726	2.68989	2.44088	0.942536	16.8882	8.40298	0.654753	11.4554	5.29974	48.254	41.661	29.9736	7.34887	48.4734	70.8184	2.68194	3.16229
ATIC	155.871	28.6819	54.6466	48.5071	51.7986	42.0293	161.77	58.4197	33.4874	51.0117	76.5993	56.7271	48.1733	36.3293	53.8342	108.006	37.1077	42.7057	37.3345	53.8873	61.5357	64.6383	55.565	74.8271	164.009	80.4073	94.9593	129.353	243.077	96.6011	89.2477	76.5758	73.3451	51.7565	79.8851	73.4778	51.858	65.1624
ATL1	5.36938	8.85171	4.04331	2.8312	4.17557	2.15113	5.36754	6.60015	7.72978	8.30843	8.31867	2.30187	6.81423	19.3239	11.7481	2.91975	5.86263	4.57805	8.07772	4.38624	7.27886	10.9874	2.52078	7.10447	6.14411	5.22896	16.9596	10.1347	4.38009	13.5684	5.69007	4.94638	5.1698	4.05102	9.33644	4.50894	5.98826	6.13647
ATL2	10.0109	9.82033	11.5401	7.0241	11.1781	11.6942	9.0284	10.2383	11.8851	10.4969	8.47027	8.98934	10.9294	8.94162	13.1034	14.2831	7.7673	9.46645	12.8809	10.7616	8.40175	9.85137	11.6366	9.48496	8.48539	8.93476	8.26881	13.9284	10.024	7.52097	9.51421	10.4932	9.46077	6.03263	10.8985	4.0658	10.0687	7.28417
ATL3	36.2098	26.6294	21.0763	24.1321	29.6393	17.2035	22.0585	15.0792	19.5164	12.4801	25.0789	22.3188	27.782	18.692	16.8855	31.8264	26.6036	20.7239	22.0367	34.7519	34.0048	36.1181	48.5582	43.991	34.5066	27.214	30.9759	32.5203	20.9382	45.0645	26.7853	13.223	22.9873	14.3979	20.1215	7.03422	22.0989	22.96
ATM	7.16461	33.8585	23.8035	19.73	26.7744	13.5797	15.2709	13.7064	42.1825	22.705	26.7908	23.0882	12.9377	29.4038	21.0413	26.6083	26.3797	22.4187	24.7192	22.3315	7.63835	19.1073	22.3022	15.9116	11.4335	11.4863	13.4198	10.6748	17.8096	11.7267	25.2553	13.6569	19.289	10.5718	17.0559	10.2976	16.6217	16.3035
ATMIN	5.45305	6.56565	3.8988	3.54808	5.28885	14.7141	5.59353	5.73461	5.37799	6.78844	10.4654	4.66759	7.66096	8.56598	14.6047	7.54841	6.12995	4.32813	7.98221	5.86222	6.60568	6.91765	10.5323	6.06749	8.94752	4.62647	10.2985	5.47733	11.2637	8.32362	5.53647	3.99733	3.94974	4.4237	5.34622	0.790472	6.51378	5.81749
ATN1	48.2059	38.7797	28.3306	36.4835	10.5748	47.4483	47.7668	23.1716	39.0817	31.3248	59.6339	68.2889	49.7797	36.3728	58.5951	44.1697	37.1513	30.9997	51.5	30.9247	33.4298	40.3173	25.136	27.3369	21.8972	67.0396	20.8883	15.6337	29.2662	35.6335	36.4355	37.6231	42.7952	45.2449	66.1522	48.3362	24.7236	43.7154
ATOH1	0	0	0	0	0	0	0	0	0	0	0	0	0	0.0163225	0	0	0	0	0	0	0	0.00724377	0	0	0	0	0.00851104	0	0	0	0	0	0	0	0	0	0	0
ATOH7	0	0.0128883	0	0	0	0	0	0	0	0	0	0	0	0.0110267	0	0	0	0	0.0234142	0	0	0	0	0	0	0	0	0	0	0	0	0	0.00813078	0.00679337	0	0	0.0173316	0
ATOH8	0.0144748	0.55724	0	0.0155123	0.0231144	0.183795	0.00935455	0.0211498	0.0678331	0.210739	0.0290247	0.0260311	0.116427	0.147759	0.224036	0.0362638	0.219542	0.167588	0.688189	0.417146	0.0850675	0.252718	0.110622	0.249412	0.00923067	0.00753061	0.021239	0.0180421	0.802276	0.105855	0.0629169	0.0586698	0.180804	0.17147	0.0962769	0.0272257	0.148257	0.0646864
ATOX1	175.493	26.0721	22.4036	46.8518	99.9824	63.2518	19.2017	100.827	45.394	31.5593	21.2925	27.9881	97.2142	28.4009	63.2308	66.7538	40.8907	28.0345	21.7752	50.6641	79.3784	41.8234	61.063	48.7983	65.9999	116.686	44.9217	109.164	104.052	102.139	36.5227	107.486	37.7218	41.9263	63.4713	11.0673	40.6913	29.3989
ATP10A	1.47667	3.86508	2.06347	4.56024	2.60228	10.248	5.56865	4.11269	2.46154	4.50501	6.82863	0.416051	1.07177	5.78647	1.93614	2.50273	3.63018	2.9937	2.86908	3.0636	2.75166	5.0835	4.16229	1.93987	2.2556	4.70006	0.879138	0.339844	2.35206	3.4207	6.28579	3.26719	5.83927	7.91937	2.15046	5.51781	4.92888	4.42848
ATP10B	0.00954415	0.496138	0	0.150561	0	0.396089	0	0	0.00550791	0.0177699	0.0426852	0.0601528	0.0179452	0.0642351	0.368965	0.0605414	0.11006	0.117047	0.28566	0.0414966	0.0499732	0.0548922	0.0252234	0.0130592	0.00976048	0.0144833	0.00612862	0.00231333	0.548831	0.00930256	0.261236	0.019381	0.0636264	0.0519008	0.189858	0.00210049	0.0498872	0.0302599
ATP10D	3.74089	6.87606	6.25697	3.73031	3.90292	4.80898	6.5898	4.03239	7.03471	5.20741	3.17971	4.01458	6.72155	7.06652	6.81646	9.65565	6.87917	5.67061	7.17025	6.22272	1.50117	7.91161	3.5422	4.24136	4.21791	1.20419	4.90542	1.08642	2.64158	4.51286	7.94335	4.33005	6.32788	3.85059	4.66953	0.907141	4.17051	5.51484
ATP11A	6.64866	5.10243	3.16986	2.37724	2.26568	6.489	3.31406	3.43233	8.52486	3.35438	4.96208	2.49318	4.90344	3.78804	3.45139	6.03254	7.06434	4.01618	7.60533	7.23552	1.99077	4.2245	2.98545	4.26604	2.09521	1.50162	1.45759	1.01491	2.72505	2.73541	4.52833	4.62967	4.42947	6.52201	4.29242	3.52713	3.48651	3.76941
ATP11B	7.7439	14.1314	6.73146	7.5763	4.43409	10.6511	6.33558	12.7139	12.3689	9.20738	6.46269	1.67757	8.75572	6.15868	14.7877	6.80358	16.6105	9.7545	14.9229	8.23437	4.10861	11.3415	7.62199	15.3846	3.80832	5.01992	1.42221	0.802876	8.92388	14.5788	8.73083	9.53924	5.99319	5.64662	5.53036	1.24249	6.93305	11.3251
ATP11C	3.35503	7.28739	3.3399	2.77919	6.65781	5.60977	4.79163	3.41365	7.98894	4.27035	4.0693	3.02619	6.30244	5.00655	7.26492	6.15978	8.11061	3.85607	8.05172	6.80685	4.6052	5.20729	6.39593	6.78759	8.20783	2.40786	3.29318	3.50662	1.70894	3.3844	4.36444	3.4551	3.77159	2.69023	3.67145	0.780086	3.26647	3.98884
ATP12A	0	0	0	0	0	0.0108785	0	0	0.017086	0.00525187	0	0	0	4.25606	0	0	0.00556983	0	0.040482	0.0190492	0.00248703	0.0106226	0	9.10863	0.0129953	0	0.00212771	0.0024113	0.00197747	0.00973224	0.115569	0	0.0345702	0	0.053896	0	0.00333351	0
ATP13A1	21.8382	7.74136	11.0016	19.3498	13.0627	17.9929	18.8791	18.8276	7.67566	11.1944	11.0427	10.4628	28.2969	13.8376	3.88645	14.2499	8.6663	8.49581	6.34156	10.5695	10.1746	14.6336	9.37602	17.3071	22.7931	10.6131	27.8878	11.3096	19.7941	12.5547	7.81484	9.47265	9.79384	18.2324	13.8944	23.4211	11.0358	8.49186
ATP13A2	46.3355	7.48073	13.3806	16.9022	19.4503	21.237	17.1195	24.3415	9.60919	13.872	7.83657	11.2564	20.6148	8.58284	17.4157	6.78396	8.15051	8.66125	7.1249	18.0846	29.5821	16.4381	28.4232	15.384	18.1559	37.7463	25.0868	35.0575	8.73301	17.1959	10.169	20.4006	15.0937	18.8917	10.9904	38.8483	8.7261	13.1595
ATP13A3	21.2059	17.817	12.3162	15.0345	20.586	16.8979	20.8906	21.1271	24.4399	14.631	22.9848	13.6956	15.2603	39.4804	28.1449	26.9868	26.9909	15.9934	19.298	24.3889	11.5432	15.1155	34.7551	19.9565	14.7275	16.0134	41.0624	13.715	11.605	13.1441	21.0488	15.5814	17.4885	18.4668	19.1027	13.2812	17.1292	17.543
ATP13A4	0.0430724	1.70264	2.74603	0.481411	19.5278	1.91298	3.41176	5.58443	4.54004	9.99084	3.43246	4.2801	0.790064	0.750249	0.00192124	2.83315	2.78574	2.49679	1.245	0.345465	0.133156	3.03477	16.6692	0.415228	0.0256499	0.107177	9.05566	17.7164	1.22729	1.27132	1.23103	0.364238	1.6209	0.345419	0.353087	11.7569	7.61205	1.59701
ATP13A5	0	0.811557	0.221284	0.0454939	0.38956	6.37459	0.0152019	1.09564	0	0.0374712	0.154753	0.127258	0.305024	0.423109	0.697001	1.02828	1.34562	0.148951	1.50964	0.327272	0.126464	0.805212	0.470488	0.0918225	0	0.00307849	0.0282003	0.162257	0.0141133	0.0544696	0.102517	0.166319	0.50816	0.0774446	0.754211	0.12368	1.70913	0.0789972
ATP1A1	92.446	54.0761	90.0966	69.6444	205.75	167.854	67.9545	37.5812	49.2443	63.9536	110.686	140.109	121.571	72.4991	51.901	84.082	76.21	58.3721	71.0663	119.317	158.055	179.99	188.372	100.852	93.4177	145.236	169.132	232.384	219.576	155.519	103.574	69.1246	94.6006	63.9505	91.4333	84.9344	142.018	68.5776
ATP1A1OS	5.00008	4.41555	9.43469	3.00482	6.63243	16.8857	7.10363	11.2208	6.27117	9.22175	7.11356	7.21787	14.7282	17.2621	5.33327	8.26015	6.23831	5.47796	5.72203	4.21224	6.0431	4.36062	7.13596	5.32143	3.59718	6.05947	8.29333	8.54781	6.94751	22.3112	6.37759	7.68131	12.6074	12.0268	9.28635	24.7319	11.3361	4.57037
ATP1A2	0.0668127	10.0639	1.10037	0.156974	0.689622	0.589823	0.31544	0.133723	1.86318	1.01353	0.553896	0.871847	1.56803	2.4399	0.764139	0.956365	1.37679	2.06037	6.4859	8.92077	0.620505	2.41958	1.62271	3.55111	0.163432	0.312252	0.551802	1.59659	0.371656	8.97301	0.283319	0.488934	1.54407	2.64054	1.87037	0.184552	1.03501	4.51131
ATP1A3	0.860334	0	0.214472	0.251269	9.70589	0.197205	0.310719	0.0136266	2.41954	3.09015	0.199997	0.259218	0.816367	2.51295	0.00651909	0.379862	0.363927	0	0.0651595	0.348377	0.751861	0.256656	0.768957	0.248536	0.611748	0.0716674	0.240598	2.4722	0.860046	0.789072	0.0952026	0.755326	0.371711	0.766792	19.8171	0.0140051	0.420361	0.190952
ATP1A4	0.436921	0.740062	0.606395	1.574	1.394	0.130506	1.10853	0.697184	1.81389	1.12991	0.324232	0.788847	1.19912	0.935548	0	1.30677	0.518318	0.358248	0.652008	1.17532	0.350616	1.56527	0.834148	0.487343	1.06003	3.17114	1.9344	1.56883	6.50368	0.0511354	0.88507	0.60165	2.20403	0.390591	0.0848314	0	0.399315	1.69519
ATP1B1	43.6969	14.7417	50.5709	16.8162	38.0455	47.7752	10.8656	27.5923	15.6685	24.7217	106.653	68.6024	18.6556	17.2296	5.77332	117.443	25.1934	45.5287	27.3862	74.2869	66.5046	116.657	99.1617	57.3986	47.2035	115.033	62.0836	138.035	400.576	97.4757	126.536	4.89781	39.1164	14.8413	18.9701	10.8607	81.3602	56.5214
ATP1B2	0.432815	1.91643	0.883692	0.122571	0.10016	0.402741	0.150695	0.714618	0.0510457	0.294828	0.530637	0.47795	1.35685	0.78053	0.951023	0.683132	1.47686	0.197978	2.96445	2.30688	0.666921	1.20118	0.920069	0.772738	0.570039	0.271705	0.423527	0.501763	2.71851	0.390736	0.297645	0.349943	1.3426	1.16647	1.15002	0.136166	0.79182	0.522334
ATP1B3	26.3317	8.35578	8.34136	7.17562	24.7474	21.3068	12.5329	8.45766	11.1766	6.00699	12.0062	3.21561	10.4637	9.44486	3.93229	8.92192	17.429	3.72543	9.5271	16.5342	16.977	12.2485	33.3636	18.4486	18.915	7.3861	23.4408	9.87261	12.2478	18.1529	10.0317	10.7354	11.0051	15.3154	11.0754	2.91471	11.3991	6.23371
ATP1B4	0.00128126	0	0.00934778	0.00383921	0	0	0.0134921	0.00980533	0	0	0.00979525	0	0.00180008	0.00498018	0	0	0	0.00977107	0	0.00326201	0	0	0.00150801	0.00161816	0.00930067	0	0	0	0.00152739	0.322205	0	0.0103784	0.00931587	0.00406136	0	0.0370325	0.018735	0.0142909
ATP2A1	0.645802	0.755915	0.427092	0.967541	0.27384	1.62605	0.972217	2.52266	1.70697	0.471863	1.06412	0.568577	1.66009	1.24833	2.2374	2.55138	0.789199	1.94385	0.717814	0.2053	0.357879	0.334823	0.21031	0.062735	0.330985	0.406991	0.188238	0.0799641	0.0673106	80.6367	0.528982	0.676036	1.37682	1.52019	1.40482	3.60682	1.34102	0.66884
ATP2A2	343.547	91.0684	96.1262	111.262	211.094	121.525	138.663	73.4344	92.3438	88.2815	133.498	87.3616	207.43	117.445	89.5932	116.503	115.539	76.7145	97.8455	128.076	156.835	128.454	163.278	113.673	173.044	94.188	193.558	87.4931	250.968	210.789	132.123	157.388	110.146	121.651	122.032	63.5679	114.669	91.3943
ATP2A3	29.0545	6.33845	10.2537	9.01553	14.9082	2.43451	36.2732	47.0813	6.97057	16.1137	33.8723	13.3393	44.7913	22.0007	4.70056	8.25281	5.33861	3.82745	7.5488	9.13227	12.2121	12.7073	9.17902	15.6678	4.39017	4.53619	57.6626	13.2548	80.173	49.3934	8.43674	6.72506	8.88846	22.6948	12.7187	43.6916	5.97462	6.75609
ATP2B1	10.9998	10.7754	5.94723	7.70981	19.4561	12.3528	8.2608	18.1752	15.4826	7.9097	10.956	9.91138	10.6261	21.5234	18.386	12.4211	15.7923	6.81122	14.0647	10.4442	10.7799	12.1439	7.23811	8.82413	17.8862	9.29028	6.91308	8.57471	15.048	16.141	10.7641	5.65482	10.3017	8.37615	10.2595	1.52181	8.75865	8.97333
ATP2B2	0.0326049	0.0733958	0.0149431	0.00119002	0.0971652	0.503432	0.0553991	0	0.19963	0.0803048	0.026057	0.00571076	0.0536898	0.198465	0	0.00811314	0.0903624	0.0938319	0.103817	0.219571	0.0345512	0.0288378	0.0141335	0.0346361	0.0283501	0.00371027	0.026632	1.36084	0.29341	0.205923	0.0420294	0.0165682	0.385155	0.159626	0.0793681	0	0.0266668	0.0322534
ATP2B3	0.0150639	0	0	0.00565241	0	0.102357	0.0255782	0.387956	0	0.0029999	0.0168283	0.00351261	0	0	0	0	0.0190496	0	0	0.00479261	0.32165	0.0234258	0	0.306807	0.0063033	0.0017138	0.00483543	0.00136865	0.00112176	0	0.0139813	0	0.0125371	0.0306788	0.0102362	0	0.0171256	0.00210426
ATP2B4	14.6201	22.3327	16.1973	9.08512	10.0072	19.4958	7.44586	12.2677	19.555	15.1538	9.42804	7.79067	14.1822	19.7478	6.12706	11.0853	16.5693	16.5799	25.4552	37.4375	12.9108	16.9318	25.9907	32.3554	7.19226	10.5624	2.36066	9.99869	13.5286	19.0466	25.8891	14.8451	22.3582	22.0597	14.276	3.41076	16.4097	11.7477
ATP2C1	66.8309	43.985	46.4249	48.6728	99.7874	67.5258	45.206	54.3585	60.2368	38.1574	48.5117	64.7385	62.0321	37.7721	80.4592	73.6087	48.4384	57.3681	49.9423	63.4959	80.3947	72.7255	126.83	74.8315	67.6648	76.7449	83.469	77.6514	67.1901	74.157	65.8575	60.8093	51.8182	33.8506	74.527	37.7614	49.8546	74.5428
ATP2C2	3.14097	4.87934	3.53708	2.37288	16.6873	8.09735	5.23242	19.1622	1.73879	3.50351	5.99301	6.94438	18.2172	20.4605	3.77568	10.634	2.1359	3.4111	2.07784	2.39245	5.73549	0.842842	8.38697	1.43879	14.7491	1.52976	31.5191	1.23231	9.217	7.78161	4.14164	1.01941	7.30778	1.12574	6.76071	6.87503	10.1716	4.04505
ATP4A	0	0.0207418	0	0	0	0	0	0	0	0.0550607	0	0.00484887	0.00974432	0	0	0.0101225	0.210276	0	0.0141183	0.0221573	0.00260275	0.0315186	0	0	0.00194367	0.00633575	0	0	0.00207481	0	0	0	0	0.00274692	0	0	0	0
ATP4B	0	0	0	0.0395108	0	0	0	0	0	0	0.0111953	0.0245762	0.0613802	0.0672167	0	0	0.0591684	0	0.0237959	0	0	0	0	0	0.0100353	0	0	0	0	0	0.00651628	0	0	0	0	0	0	0
ATP5A1	143.253	51.5564	62.4133	47.8148	136.024	60.7552	62.3835	38.4235	41.12	48	80.4357	67.1304	57.7992	32.5709	47.9265	48.4807	58.5467	34.1006	51.3784	118.488	115.186	116.238	136.798	129.566	113.959	368.656	165.823	231.565	111.356	125.093	72	72.3393	79.8097	41.7249	49.773	67.6862	71.0386	59.5145
ATP5B	296.124	93.8163	66.2597	94.2641	337.757	86.1052	172.156	64.333	39.2975	59.3557	96.9376	88.4005	147.183	58.6275	79.5597	109.623	79.0117	41.8092	70.7668	149.718	127.923	138.41	200.818	116.824	144.003	116.044	182.868	149.769	149.587	232.835	97.2568	105.01	87.8272	75.2818	112.674	59.6082	92.5256	83.4657
ATP5C1	112.231	43.4115	40.1958	41.067	114.652	66.041	49.4742	49.4575	28.224	31.3855	59.001	51.6987	59.7983	26.3262	41.7827	57.955	46.2464	32.1936	46.5073	59.5177	101.125	53.7706	105.815	167.716	134.725	86.8434	91.4984	121.961	83.0223	122.679	56.3681	67.9797	38.4068	26.0721	35.3427	23.6967	37.787	47.5616
ATP5D	17.4662	8.77434	14.4284	10.6878	23.8508	14.4481	18.7579	23.0443	1.40733	10.7606	10.3017	18.6605	12.1936	5.02589	11.9912	8.71289	10.6182	9.03637	8.58153	22.332	22.2847	19.2124	28.1108	18.0049	27.7875	27.7899	33.5389	31.5229	16.1097	23.8235	7.61363	13.6225	17.1814	24.6027	19.2322	37.6632	14.0295	11.4496
ATP5E	938.978	251.963	245.468	413.427	873.435	487.228	320.905	306.849	155.092	300.139	276.789	223.099	590.54	169.306	239.925	447.876	337.869	220.879	246.614	750.396	765.227	557.28	1334.23	580.039	1011.16	732.706	774.557	979.196	915.91	995.614	512.925	612.499	324.551	385.174	357.703	204.642	302.618	498.059
ATP5EP2	0.205991	0.317399	0.46174	0.325543	0.145559	0	0	0	12.7073	0	0.515317	0.229327	0.728452	0.0620124	0.17804	0.925529	0	0	0	0	0.0593423	0.00943017	0	0.0802123	0.0863026	0.230195	0.277171	0.0460287	0.116033	0	0.728127	0.866668	0.384415	0.722667	0.545071	0	1.17073	0.607701
ATP5F1	28.028	9.24518	6.23223	7.23534	26.5883	11.11	12.2718	6.29507	9.55898	7.40655	9.20433	12.4373	13.8847	8.09909	16.9307	8.6124	11.0669	11.3256	15.7391	19.3905	29.4653	18.0287	39.3958	25.8535	37.1888	32.7803	26.8577	52.3034	19.9495	20.6298	18.5772	15.165	13.6246	7.89782	19.1226	4.0905	12.8613	13.6467
ATP5G1	145.777	18.3	20.9994	17.0766	60.6868	22.1425	39.4928	31.3404	14.3846	13.8244	19.1359	24.0269	23.0079	16.2967	1.9276	15.661	16.0197	14.8768	15.6456	41.3104	33.525	40.9176	53.303	24.8728	71.6779	52.9685	56.8736	79.8871	66.9708	54.3987	32.7889	32.8464	30.2507	22.9878	51.6455	3.26041	23.1002	18.1731
ATP5G2	175.365	43.9982	74.2149	74.7271	175.186	40.1207	97.6319	49.2527	21.9839	48.9399	81.4132	163.04	83.4565	36.2173	59.1196	77.3898	49.3138	22.4014	34.6894	92.1423	96.3761	108.135	137.331	50.5242	78.4993	115.565	136.612	194.157	204.057	154.843	47.952	48.8658	50.4302	54.57	74.8543	50.3599	51.6985	62.0477
ATP5G3	15.5426	4.65303	5.70597	4.36372	15.6972	9.33145	5.63079	8.37334	2.38326	3.66022	4.39172	4.86609	8.93966	3.36237	1.70695	6.23772	5.18886	2.09896	3.59369	12.6402	7.73539	7.12165	12.2283	13.7072	8.94406	9.46379	11.6398	18.1807	14.0953	13.5223	5.65711	11.3801	6.57227	4.61887	10.571	4.52387	6.16028	4.95622
ATP5H	324.011	60.4381	38.424	77.6062	157.094	129.313	90.3227	103.464	43.4937	63.6495	62.7242	79.7329	111.113	73.565	46.1507	74.7816	61.9783	55.823	54.9136	117.37	122.605	108.979	321.053	141.068	433.148	155.962	179.503	312.801	166.002	158.184	90.1992	137.459	79.1728	70.4792	185.528	77.897	89.2873	76.7599
ATP5I	1020.68	176.492	121.485	171.481	419.202	303.212	445.048	279.034	149.783	108.816	189.457	175.064	303.314	157.553	136.162	250.811	156.803	178.537	202.186	392.336	521.716	325.462	505.024	483.816	619.118	576.361	588.067	921.845	360.145	623.457	201.844	160.19	201.56	174.327	365.631	163.21	237.303	233.187
ATP5J	20.3474	15.7365	6.72005	13.1087	32.5934	16.3257	17.1077	11.9918	12.1065	10.3261	15.3905	17.358	22.4446	4.53123	23.9332	25.6255	16.5624	21.065	21.2877	21.1809	40.5207	18.4748	44.1771	35.2577	36.6386	37.1271	28.3177	27.6745	49.0135	34.9855	20.5671	15.4421	14.2412	9.64396	14.8386	3.10592	13.207	20.2547
ATP5J2	224.381	30.09	51.185	49.5059	138.357	114.345	86.489	62.7746	53.2828	72.2568	34.984	79.0685	107.523	39.2213	40.4369	87.7312	63.7246	56.0078	60.2732	100.826	162.1	84.2618	274.098	150.642	178.346	172.17	185.29	425.857	234.657	229.063	122.497	282.037	97.472	84.9884	113.78	44.2552	88.3158	106.255
ATP5J2-PTCD1	3.4894	1.64366	8.38659e-05	1.72716	1.84912	1.71366	7.58934	3.0424e-05	2.54507	3.01003	0.570517	2.33764	3.51675	0.000993135	0.4467	2.68179	2.05323	4.86023	2.68021	2.45599	1.47168	1.1789	1.50398	1.79541	2.54056	2.02619	1.97131	2.84091	1.68208	3.47181	0.623298	6.43133	3.14472	1.59973	2.66864	1.47462	1.66221	1.3546
ATP5L	81.3265	37.8525	48.2976	37.6659	113.217	62.4185	49.8952	77.579	37.8113	37.9994	51.5643	69.0415	34.5359	57.2783	23.3346	40.5653	44.2569	27.1545	50.2494	81.4797	69.3443	67.579	142.035	79.999	84.26	94.8505	92.0106	92.3966	111.728	89.9091	59.0536	78.3637	68.3481	58.226	52.733	56.2961	53.7344	44.5766
ATP5L2	0.363592	0.189648	2.41191	0.520024	0.215285	0.0886362	0.266466	0.18092	0.12031	0	1.41815	0.468696	0.101121	0.749568	0	0.739476	0.468733	1.20925	1.72544	0.195997	0.514627	0.0629941	0.194437	0.00603429	0.0178183	0.173847	0.0881524	0.00346964	0.117419	0.125644	0.731556	0.057924	0.304895	1.07542	0.0969246	0	0.440636	0.242715
ATP5O	54.0749	50.6621	41.7037	71.984	150.775	100.773	64.0566	44.024	39.7454	54.4291	71.8753	90.7869	54.1066	39.3893	65.4648	81.9969	65.4378	43.964	57.2606	123.166	123.363	103.016	211.031	125.376	134	127.543	95.1527	98.3074	160.076	113.706	59.3991	50.8847	61.3659	40.6223	55.9859	31.1405	49.701	58.4143
ATP5S	2.13634	2.18632	1.64176	1.76469	2.38325	0.967665	2.33411	4.99178	3.7569	2.75751	3.07233	1.61686	2.08801	2.19271	3.62236	2.43947	1.91381	2.41806	1.95357	1.69529	2.65755	1.92847	1.15804	1.43283	2.18751	2.15656	1.85457	3.4275	2.96952	2.51789	1.88966	2.15361	1.72263	2.23528	2.82846	2.27746	2.92205	1.96495
ATP5SL	5.91763	2.516	6.30023	2.33333	5.9646	5.71607	6.66744	7.04451	2.05887	1.79802	2.58854	4.16037	4.57029	2.09069	2.89243	4.16385	2.33656	3.38407	2.25364	4.22409	6.10333	5.80438	6.62981	3.21841	5.70785	5.63007	6.403	9.24387	6.27015	4.58122	3.45392	4.57482	3.27293	2.86397	3.99954	2.91548	3.20663	2.66892
ATP6AP1	260.958	20.9045	31.1047	34.1757	57.8688	38.0687	36.9435	64.2803	32.3646	30.8936	50.9659	66.7399	117.9	38.2133	38.4194	33.2735	30.6593	10.0509	19.5563	63.0119	105.632	64.4806	98.281	58.006	112.855	103.918	161.845	108.538	124.021	94.7639	37.2735	76.4696	32.652	64.6697	65.8216	81.0255	37.5465	35.031
ATP6AP1L	3.05553	2.6016	4.30743	3.7694	1.82349	1.3862	6.2437	15.0311	1.21604	4.1253	3.84677	7.04281	2.80361	1.64378	8.45457	2.47943	2.78921	4.43439	3.05138	3.04693	0.903726	1.59053	0.489021	1.08625	2.93047	3.092	1.21077	2.78356	1.06838	1.40129	4.96117	2.91734	2.99666	0.889736	0.914992	7.32705	2.45569	1.85599
ATP6AP2	134.969	35.7867	52.938	64.0684	232.19	68.5896	53.796	48.5239	33.1705	81.5967	47.0967	58.1153	80.2089	37.5131	45.5891	55.1041	64.4881	23.611	36.9317	116.892	130.264	99.6534	160.361	107.8	85.2364	139.752	157.908	255.915	370.353	126.953	67.8341	56.3537	51.9741	61.7144	44.3448	68.2542	54.4378	52.9807
ATP6V0A1	18.8684	14.0236	9.94762	10.4233	7.72262	10.2384	14.9425	13.0361	27.6748	14.1399	11.5173	12.864	13.959	28.591	8.31232	8.83248	19.0812	10.7291	17.2851	15.8717	8.2942	11.875	14.4542	8.20876	8.35432	9.58085	11.3107	15.1507	9.11119	11.3251	16.0465	11.1141	15.4224	12.5639	21.5646	12.6166	12.4486	9.04072
ATP6V0A2	8.23374	9.09127	6.36745	8.91571	13.3461	6.6723	10.8562	13.5819	9.60628	9.93574	7.89678	5.0337	8.7539	8.21237	9.32154	10.5355	10.399	5.05284	8.56017	5.41822	7.15171	6.71584	4.84598	5.34236	11.0705	7.60968	5.96611	5.25174	6.86953	8.46728	5.02487	6.20948	7.3982	7.98235	7.80169	9.10791	10.0287	6.75863
ATP6V0A4	11.5388	0.14712	7.83636	0.615722	1.90946	1.81537	6.53691	25.5367	1.04156	2.38521	0.224858	0.147594	4.16376	2.90763	1.06375	5.59538	1.00154	0.0124726	0.588132	0.750921	0.518007	0.915836	1.98692	3.57688	0.0806279	2.15872	0.262012	0.23675	4.0253	1.48332	2.26312	3.73838	0.575425	0.989506	1.31841	3.99776	1.66893	0.165937
ATP6V0B	134.012	13.0277	21.1561	19.2134	89.0147	22.8475	39.3095	49.7027	21.3714	15.4579	14.6342	26.9682	42.5268	24.0431	6.85276	12.579	15.1136	9.07052	7.73434	27.2379	31.4849	32.5365	71.2143	42.338	92.7617	41.4675	70.4054	127.62	27.874	62.8099	13.7469	40.4722	11.1849	19.1173	27.8899	36.6225	18.3747	14.3558
ATP6V0C	59.2336	11.9976	15.6777	12.975	17.3457	18.9232	31.1199	28.4685	16.9721	13.5629	17.5682	27.1326	32.2026	25.7549	11.8754	11.3355	16.102	6.22772	11.2595	19.7751	33.8851	17.6219	30.7658	23.3518	47.755	56.2209	36.2755	42.5297	21.6534	46.4362	17.7469	22.6771	14.863	17.9913	20.7941	7.08498	21.3355	20.4062
ATP6V0CP3	0	0	0	0.0378958	0	0	0	0.247305	0	0	0	0	0	0.0309005	0	0	0	0	0	0	0	0	0	0	0.0230443	0	0	0	0	0	0	0	0	0	0	0	0.0249382	0
ATP6V0D1	44.6196	9.14992	9.74695	12.4633	22.6716	25.7769	13.3591	11.3109	7.85938	10.6279	11.121	4.22407	16.2883	17.5913	7.4987	9.79973	16.6589	5.24603	11.3368	28.452	29.6228	34.1289	39.3386	24.2307	40.006	28.3774	53.5618	30.7856	40.9306	53.5565	14.1379	12.6795	14.0394	17.5862	11.39	9.18858	22.4788	14.2693
ATP6V0D2	0.128983	0.350123	0.0871731	0.239623	0.697725	0.262025	0.311064	1.08221	0.517475	0.210757	0.13583	0	0.283861	0.884509	0	0.147544	1.48028	0.210052	0.21672	9.28577	0.0281318	0.143662	0.0127257	0.359654	0.390693	0.078255	1.52186	0.0234341	0.426356	0.338938	0.723099	0.124623	0.382721	4.28133	0.131605	0.0485491	0.321531	0.599806
ATP6V0E1	83.2854	30.7693	29.8423	34.8488	72.9195	34.718	24.0696	37.2686	18.6359	19.3063	37.3658	45.3657	65.927	21.2436	9.48639	38.1671	41.7985	10.6015	32.4446	52.948	49.0403	52.1442	73.9912	68.3124	106.64	95.0603	76.1611	108.237	113.747	124.658	44.9295	69.8157	29.9959	39.9661	66.1401	15.5889	32.3628	42.9475
ATP6V0E2	2.61964	0.88453	0.751678	0.543538	1.63325	0.956185	3.70169	3.76994	1.06107	1.73047	0.269119	1.53347	2.29233	2.3257	0.87067	1.03725	0.642057	0.759845	0.504155	0.85445	1.00585	0.971675	2.5418	1.28675	3.27588	2.41955	1.97777	2.60603	1.47485	2.58982	1.33758	3.43102	1.02915	1.28949	3.96462	4.10211	2.41592	0.701062
ATP6V1A	19.5833	6.68612	6.00964	7.34284	20.3734	11.9811	6.6264	8.46915	4.9452	5.56395	9.77169	6.84045	9.89443	4.69442	6.65615	8.02203	10.2575	5.36807	6.50419	16.1694	16.0337	14.0263	24.7628	15.4712	13.9924	17.5651	20.211	18.9531	22.9101	24.3772	11.1577	8.26645	7.44006	6.95226	9.0666	5.82679	9.89869	7.68365
ATP6V1B1	57.8872	2.68459	0.971972	5.0856	4.64065	34.6225	3.37693	45.9152	15.7306	10.5342	2.45264	1.63673	15.7601	9.42244	3.66194	3.36113	5.47819	3.62892	8.15556	3.50361	31.1982	10.6464	73.7577	20.2745	3.23765	21.3223	25.6903	12.4318	83.795	0.992887	6.77793	15.3722	7.85426	55.1327	112.18	5.6492	1.84003	54.9299
ATP6V1B2	22.6629	19.2	16.8485	14.6701	28.7934	24.3071	12.7434	12.033	21.1658	11.2356	19.1915	12.9277	12.7574	17.7812	6.56744	13.4463	23.4641	12.5199	18.2971	50.9837	18.5612	23.3234	31.6704	26.4376	25.945	17.0056	22.138	32.4669	34.7221	26.2356	36.0743	20.6067	15.6591	24.7104	18.6488	7.90447	25.0844	17.1954
ATP6V1C1	30.3815	6.03432	4.74276	5.71881	6.36377	8.70318	14.7591	4.35604	10.5269	4.46035	7.0948	7.77312	10.2479	8.49903	9.56634	5.11334	6.41281	3.60337	7.60178	10.2257	5.25586	6.59171	13.6301	11.7699	14.2336	7.39501	6.88827	9.90887	10.7543	6.62954	8.02355	14.1484	4.14583	7.55556	12.8131	1.5232	3.93048	5.61128
ATP6V1C2	1.33552	0.431337	0.488862	0.042039	2.49013	6.46425	1.34464	1.72411	0.0282739	0.655883	0.178746	0.29112	1.58578	0.553585	0	0.403191	0.762264	0.194985	4.80877	1.04177	0.206963	0.435784	0.337417	1.59522	0.130978	0.0109913	0.0387184	0.00877739	0.460872	0.140755	2.43368	1.08129	0.436272	0.95727	9.30437	0	0.342862	0.308295
ATP6V1D	34.1735	9.98883	12.3198	14.5876	18.0875	16.263	15.4415	16.838	8.65972	16.8476	19.4767	17.4349	13.1537	15.2255	15.3006	17.891	14.5197	8.14445	12.7692	23.1854	28.4218	22.6946	28.6389	22.0428	19.7096	24.5472	26.7325	25.2439	31.9117	39.7889	15.8064	10.7558	13.564	14.5863	9.09859	18.5376	10.1498	15.6251
ATP6V1E1	48.9019	18.8055	21.0045	15.5675	25.949	26.5248	17.8401	14.8267	18.4964	8.96842	29.6744	30.3897	23.1643	19.352	20.9367	25.7978	21.7875	8.48293	18.7472	42.9987	40.3553	41.3961	105.25	53.3693	44.4856	25.9373	59.3727	59.6511	72.5787	37.8243	21.868	21.736	14.9462	18.9354	22.1052	5.4395	24.5618	20.4328
ATP6V1E2	0.104735	0.164126	0.375661	0.0581788	0.0586352	0.137681	0.164232	0.253985	0	0.0919277	0.148391	0.235157	0.226459	0.0497915	0.798827	0.103628	0.174253	0.283663	0.254226	0.143937	0.0881016	0.133276	0.0660378	0.190085	0.201484	0.262078	0.100579	0.294892	0.328082	0.124931	0.283026	0.119808	0.0549289	0.224377	0.199392	0.109052	0.155957	0.0792601
ATP6V1F	38.5106	12.965	8.82998	13.9155	26.6649	15.5099	15.8923	12.4629	5.16142	10.1575	10.8629	13.251	23.3255	7.43056	3.64941	12.9583	14.8741	8.3986	7.59772	22.7904	22.4051	12.2288	42.6094	24.6094	51.9031	25.2271	34.0736	41.8326	29.5612	33.9	10.2268	24.3829	6.30002	9.50445	17.3874	1.99393	10.0633	9.04666
ATP6V1G1	89.7373	8.40707	10.8673	11.4191	35.0732	19.4625	11.5634	41.1127	11.575	12.3334	13.6449	32.0903	35.2082	17.3302	17.3363	11.1368	11.073	11.9576	12.2656	21.8912	47.362	29.5659	64.4308	34.7356	51.9927	36.9523	35.9256	83.7396	47.3208	48.4146	16.6757	31.7735	16.1328	36.533	28.5646	15.6213	20.1227	19.1173
ATP6V1G2	0.459476	0.722874	2.70239e-172	0.259493	0.237464	0.223163	0.303524	0.129585	0.631417	0.0997268	1.09932	0.786118	0.832626	0.114139	0	0.62268	0.258172	0.859981	0.136384	0.0592753	0.118042	0.223442	0.49503	0.255809	0.638757	2.41959	0.459411	0.421884	0.352415	0.386461	0.279358	0.194856	0.478137	0.349077	0.160888	0.386621	0.582311	0.36728
ATP6V1G2-DDX39B	1.46253	0.170105	0.449751	0.858345	2.02713	3.82604e-08	6.17679	5.87664	4.19978e-10	3.23605	2.8383	0.862209	5.6338	4.86504	2.04782e-05	1.28482	1.35519	2.44734	2.282	0.460474	2.12573	2.75816	1.10617	1.13431	3.49818	7.84433	0.779627	0.978811	1.43185	0.525339	1.83518	1.83361	4.65729	3.13328	1.64026	4.50217e-18	1.12623	1.80271
ATP6V1G3	0	0	0	0	0	0	0	0	0	0	0	0	0	0	0	0	0	0	0	0	0	0	0	0	0	0	0	0	0	0.0196219	0	0	0	0	0	0	0	0
[truncated: 22,001 more rows]
